# Supplementary material for: Evidence of Immune Modulators in the Secretome of the Equine Tapeworm Anoplocephala perfoliata
Source: MDPI journal article supplement (doi:10.3390/pathogens10070912), 2021-07-20
Supplement: s1 [file s1]

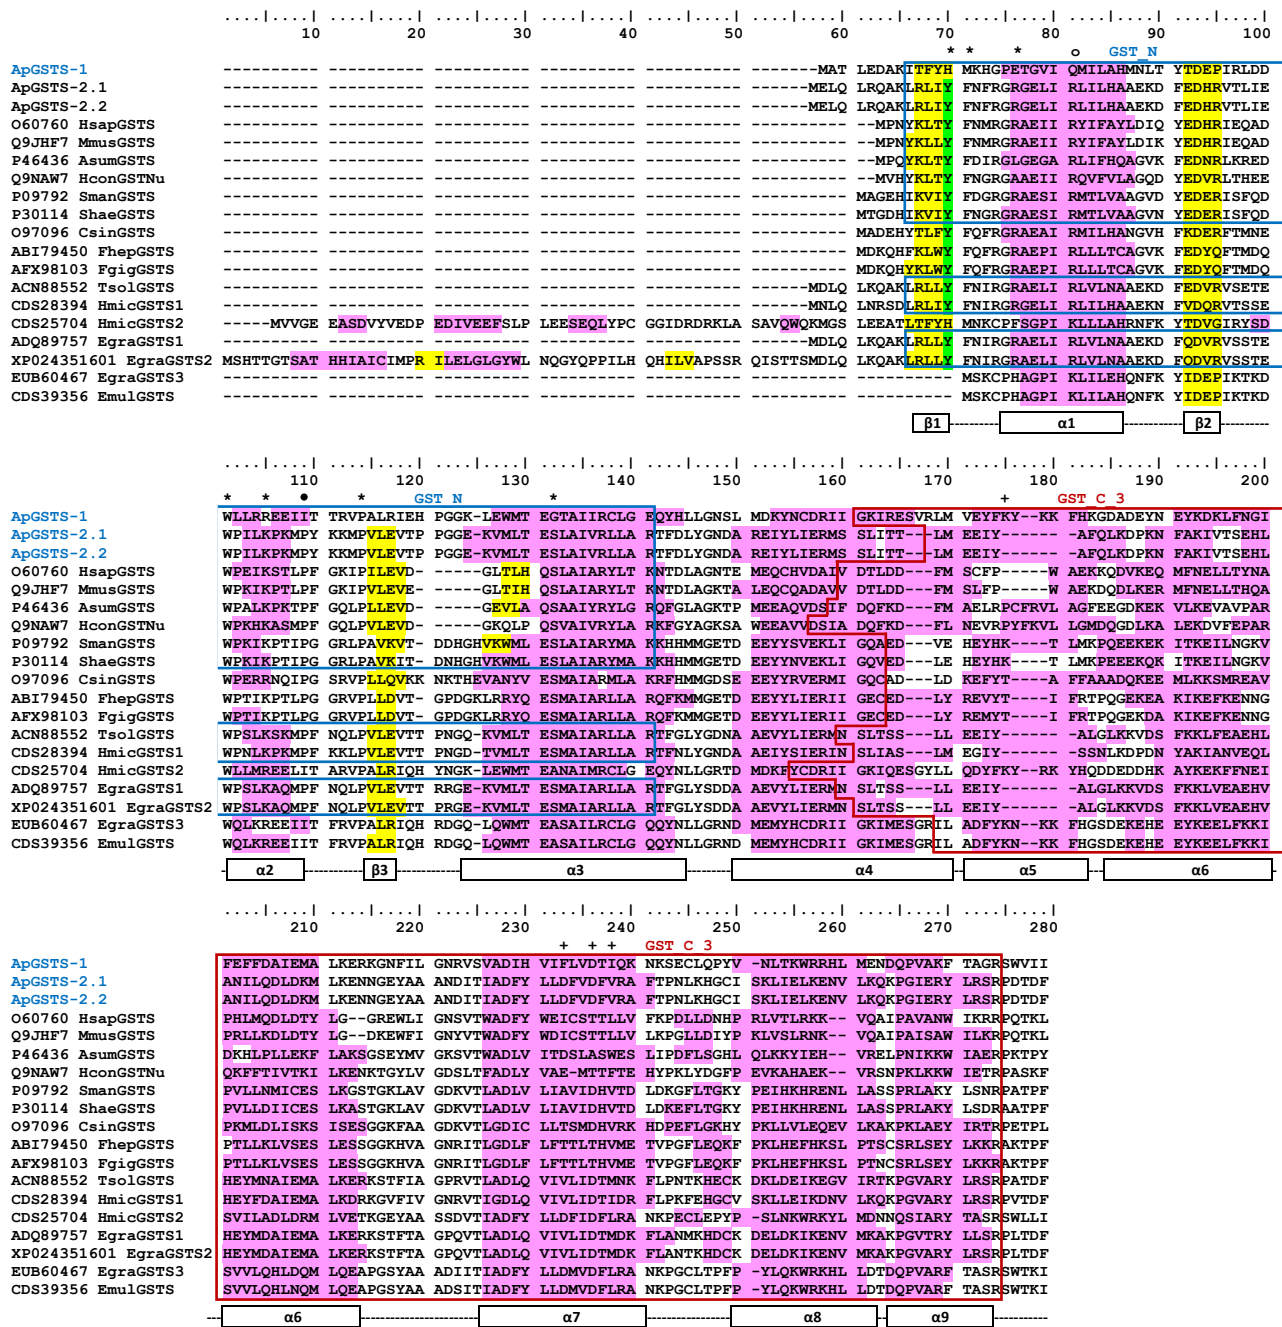

**Supplementary Figure S2.** Multiple sequence alignment of the two novel Sigma class GSTs identified in *A. perfoliata* (AperGST-S1 and S2). Secondary protein structure prediction using the PSIPRED Protein Analysis Workbench is presented below the alignment: the alignment is comprised of 3  $\beta$ -strands, shaded in yellow, and 9  $\alpha$ -helices, shaded in pink. The catalytic Tyrosine residues (Y) as denoted by Nguyen et al. (2010); Yamamoto et al. (2007); Zhang et al. (2020) and Xie et al. (2015) are shaded in green. The GSH-binding sites (Tyr-8, Phe-9, Arg-14, Trp-39, Lys-43, Pro-52, and Ser-64 (Nguyen et al. 2010; Zhang et al. 2020; Xie et al. 2015; Yamamoto et al. 2007) are indicated by asterisks (\*) and the substrate binding sites (Nguyen et al. 2010; Zhang et al. 2020; Xie et al. 2015) are indicated by a cross (+). The predicted N- and C-terminal GST domain profiles are indicated by blue- and red-boxes
