# Supplementary material for: Evidence of Immune Modulators in the Secretome of the Equine Tapeworm Anoplocephala perfoliata
Source: MDPI journal article supplement (doi:10.3390/pathogens10070912), 2021-07-20
Supplement: s1 [file s1]

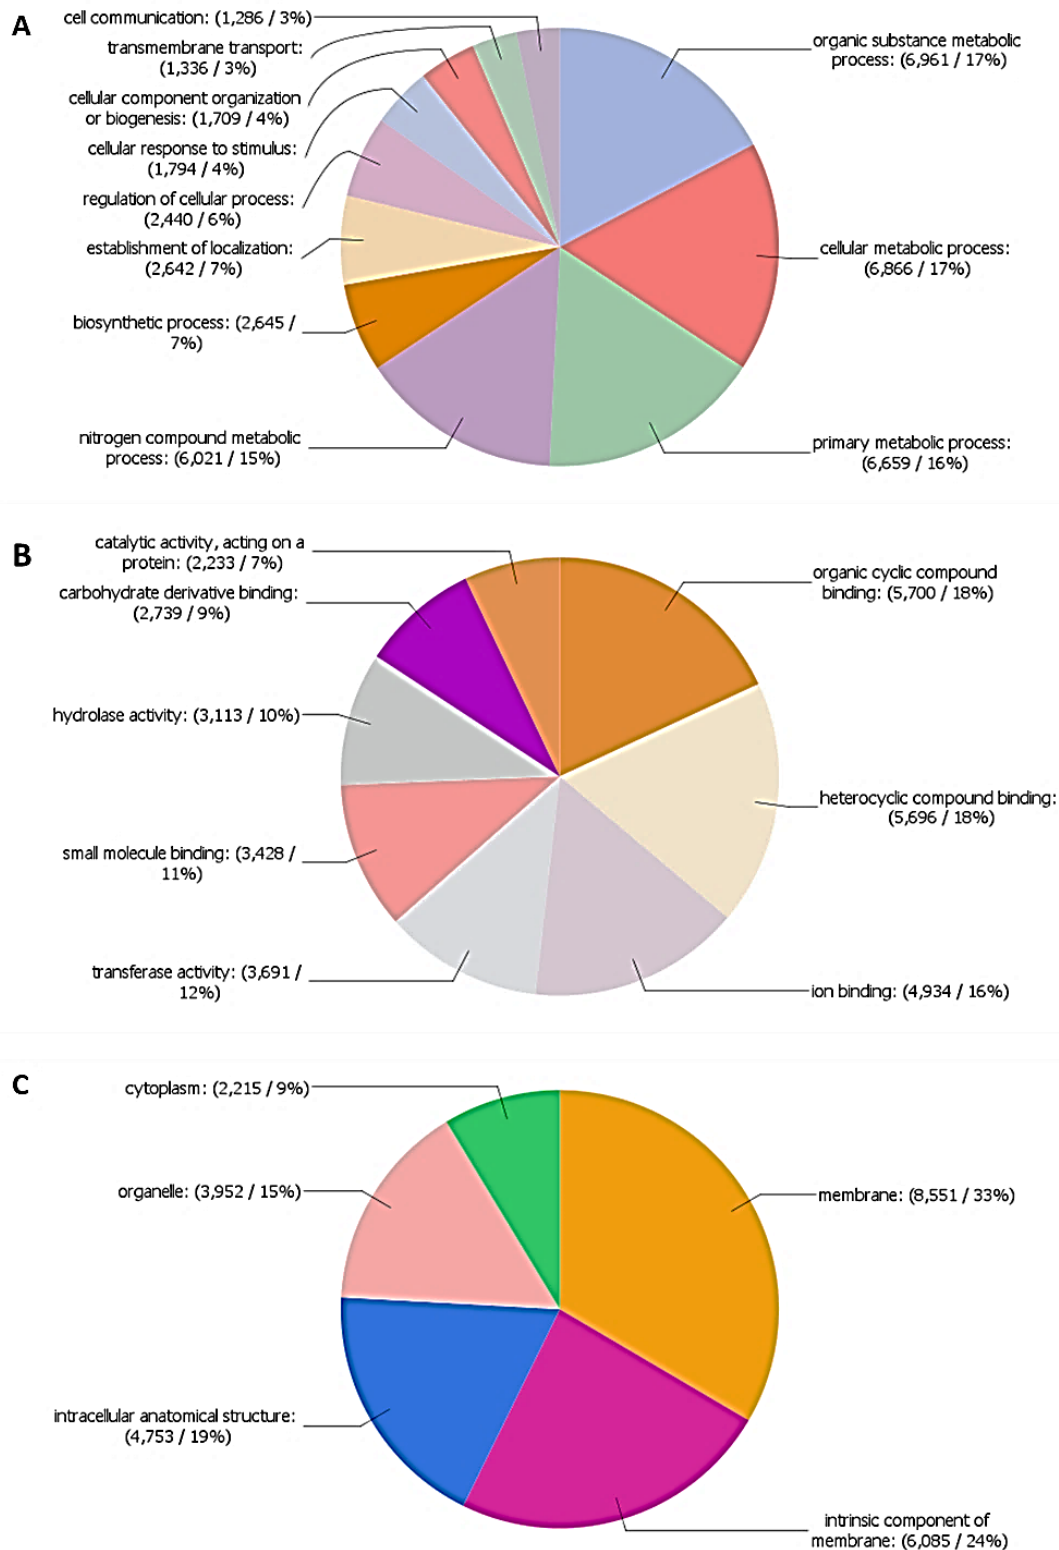

**Supplementary Figure S1.** Summary of the distribution of GO terms in the novel adult *Anoplocephala perfoliata* transcriptome at level 3 representing the relative abundance of GO terms in each three main categories. (A) Biological process category, (B) Molecular Functions category and (C) Cellular Components category
