# Supplementary material for: Evidence of Immune Modulators in the Secretome of the Equine Tapeworm Anoplocephala perfoliata
Source: MDPI journal article supplement (doi:10.3390/pathogens10070912), 2021-07-20
Supplement: s1 [file s1]

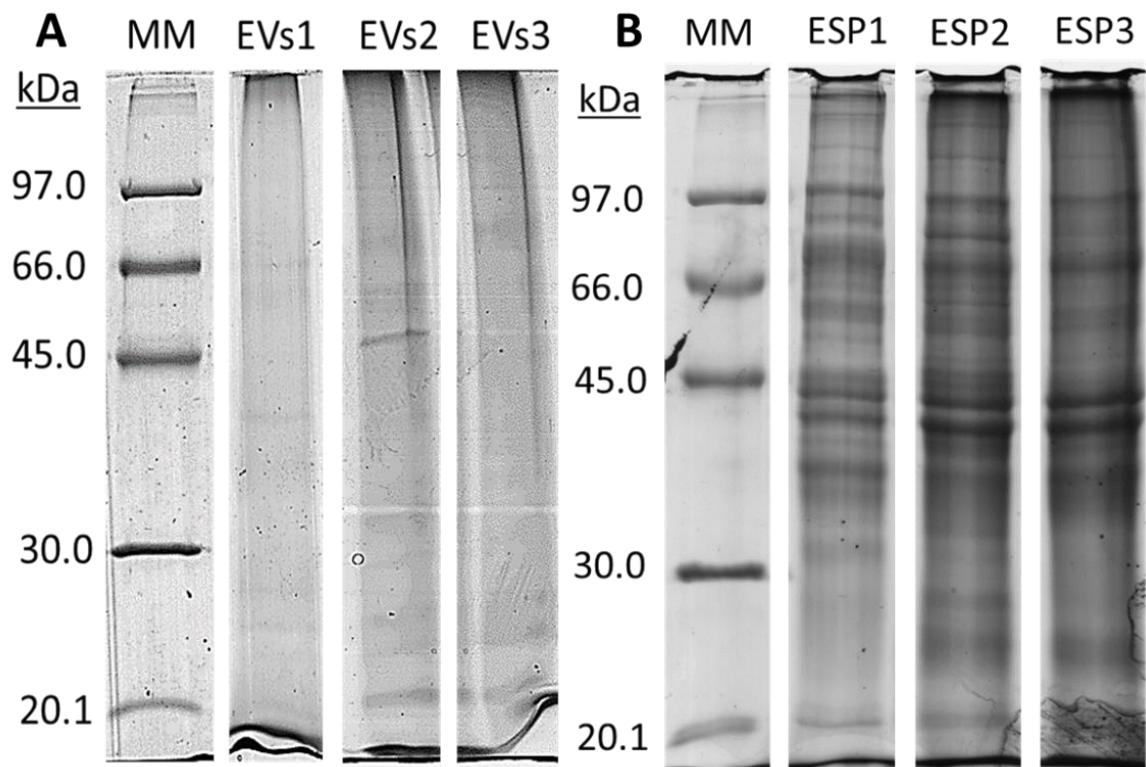

**Supplementary Figure S5.** Protein profiles of the *A. perfoliata* secretome fractions. (A) whole extracellular vesicles (EVs) and (B) EV depleted excretory/secretory protein (ESP) from 3 biological replicates displayed on a 12.5% one-dimension sodium dodecyl sulphate polyacrylamide gel electrophoresis (1D SDS-PAGE) gel stained with colloidal Coomassie blue. A total of 10  $\mu$ g of each protein sample was loaded per lane. MM: Molecular weight markers.
