# Supplementary material for: Evidence of Immune Modulators in the Secretome of the Equine Tapeworm Anoplocephala perfoliata
Source: MDPI journal article supplement (doi:10.3390/pathogens10070912), 2021-07-20
Supplement: s1 [file s1]

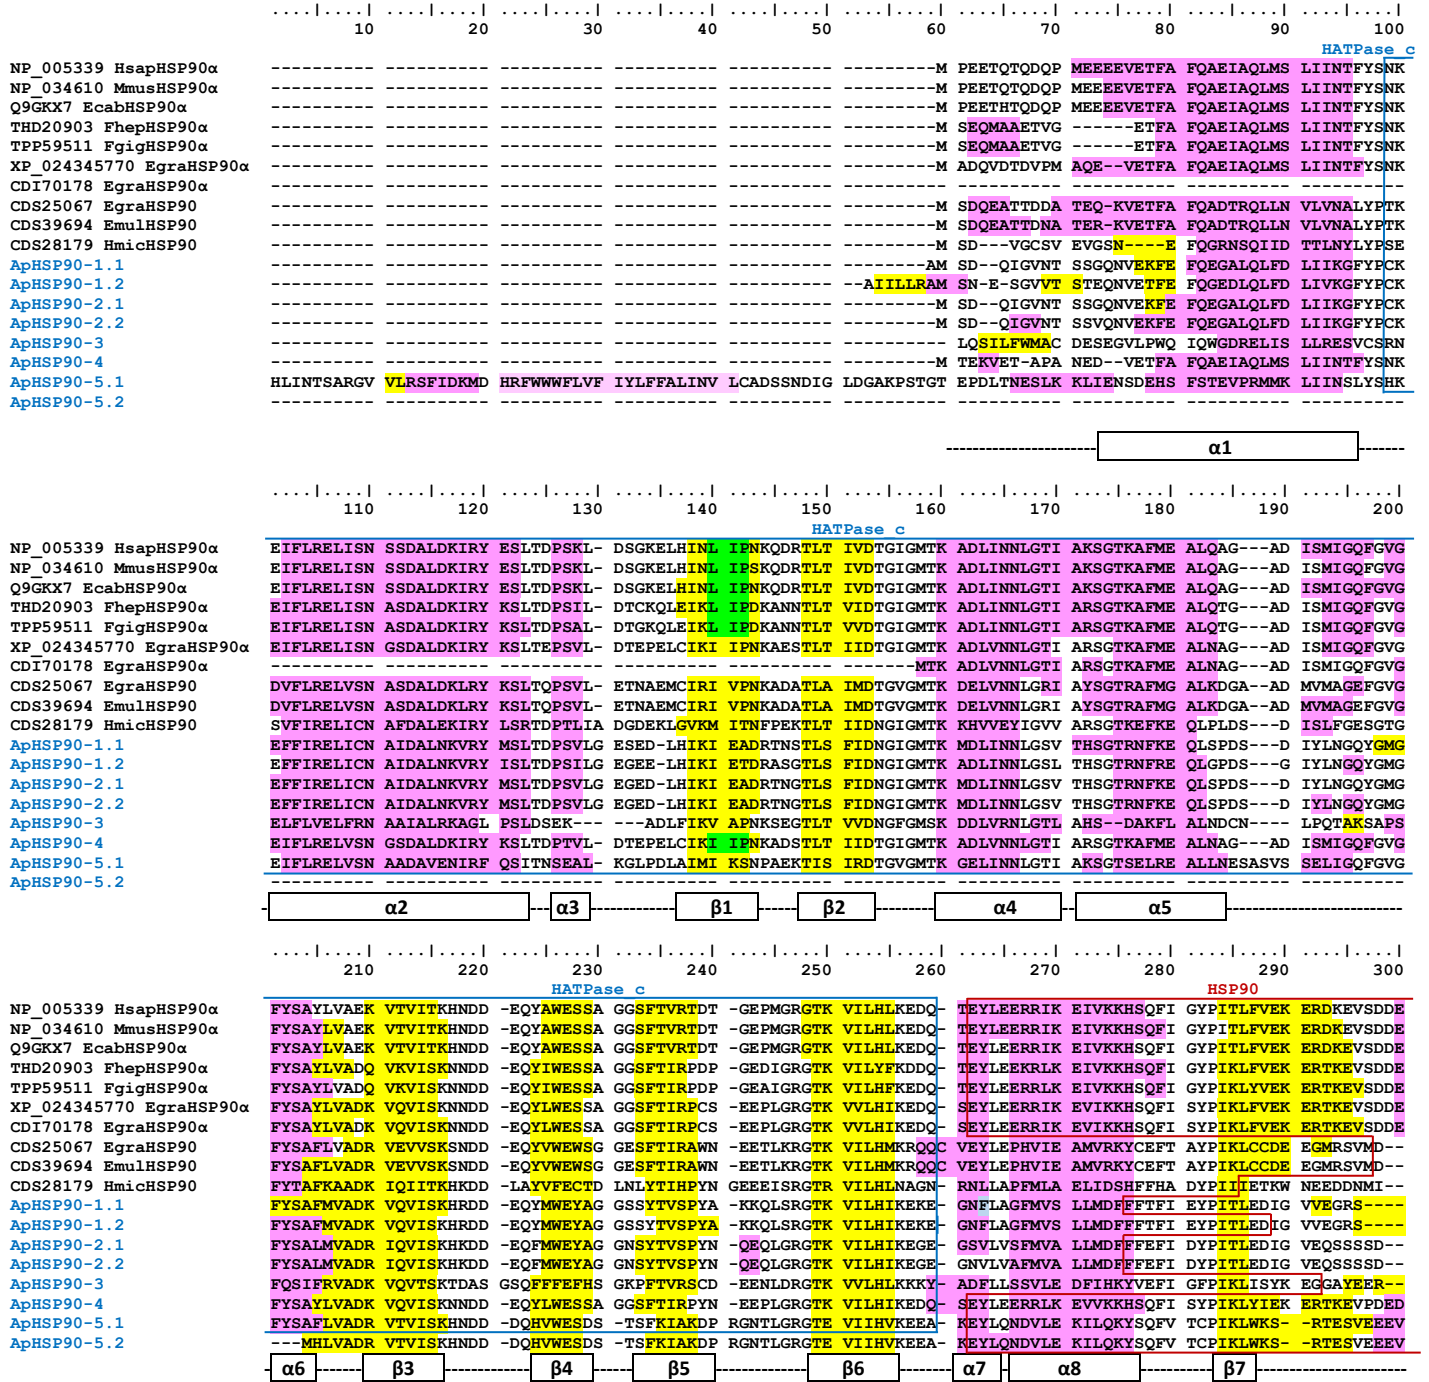

**Supplement Figure S3.** Multiple sequence alignment of the 5 (including isoforms of each) novel *A. perfoliata* Heat Shock Protein 90 alpha (HSP90 alpha/α) sequences with recognised HSP90 alpha isoforms BLAST hits sequences. The secondary protein structure prediction the HSP90 alpha characteristic structure using the PSIPRED Protein Analysis Workbench (presented below the alignment). Each β-strand or α-helix is numbered and shaded in yellow (β-strand) and pink (α-helix). The domain analysis of C-terminal and N-terminal domains of HSP90 alpha isoforms using SMART tools is boxed in blue and red, respectively. Unique cytosolic HSP90, MEEVD peptide sequences are in green type and the unique cytosolic HSP90 alpha, LIP and EDD peptide sequences are shaded in green (Chen et al., 2006; Skantar & Carta, 2004).

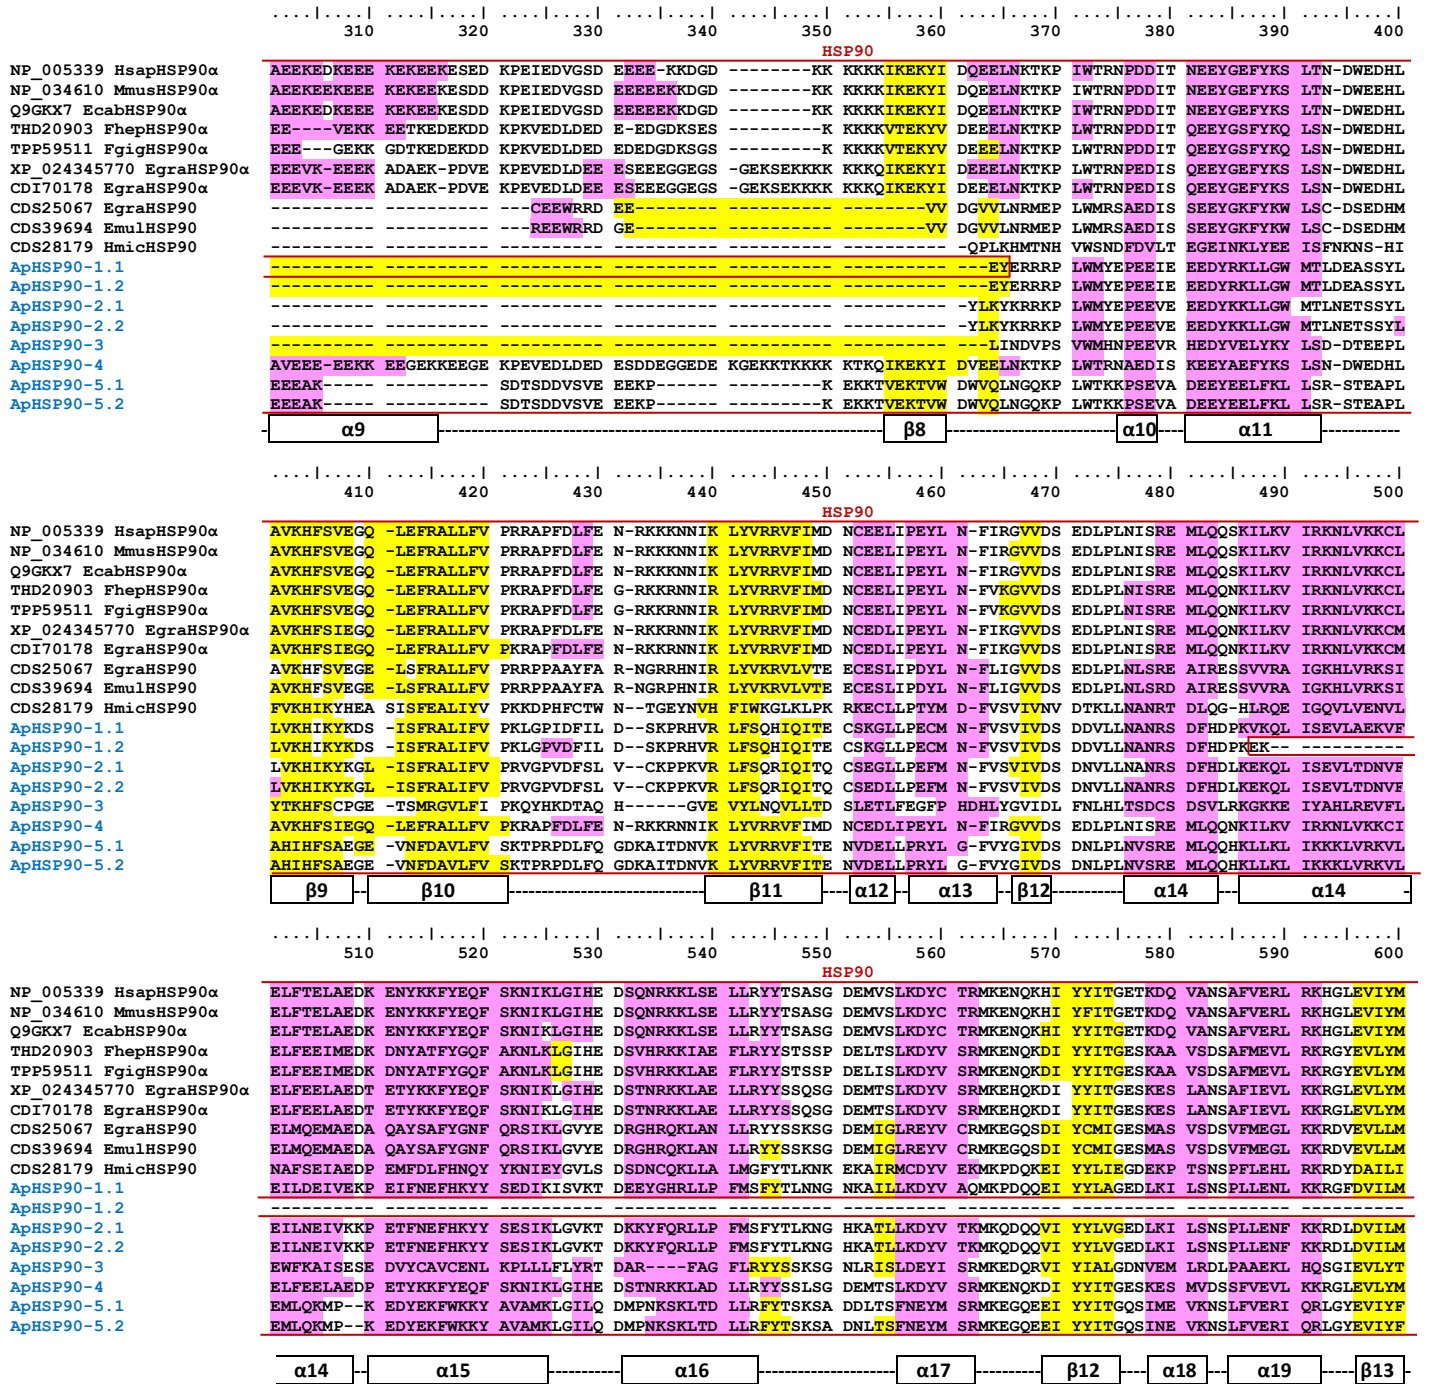

|                          |             |               |             |             |            |             |             |            |             |              |
|--------------------------|-------------|---------------|-------------|-------------|------------|-------------|-------------|------------|-------------|--------------|
|                          | 610         | 620           | 630         | 640         | 650        | 660         | 670         | 680        | 690         | 700          |
|                          | HSP90       |               |             |             |            |             |             |            |             |              |
| NP_005339 HsapHSP90α     | IEPIDEYCVQ  | QLKEFEGKTL    | VSVTKEGLEL  | PED-----    | -----EEKK  | KQEE-----   | KKTKFENLCK  | IMKDI-LEKK | VEKVVVSNRL  | VTSPCCIVTS   |
| NP_034610 MmusHSP90α     | IEPIDEYCVQ  | QLKEFEGKTL    | VSVTKEGLEL  | PED-----    | -----EEKK  | KQEE-----   | KKTKFENLCK  | IMKDI-LEKK | VEKVVVSNRL  | VTSPCCIVTS   |
| Q9GKX7 EcabHSP90α        | IEPIDEYCVQ  | QLKEFEGKTL    | VSVTKEGLEL  | PED-----    | -----EEKK  | KQEE-----   | KKTKFENLCK  | IMKDI-LEKK | VEKVVVSNRL  | VTSPCCIVTS   |
| THD20903 FhepHSP90α      | LDPIDEYAVT  | QLREYDGKKL    | VCVTKEGLQL  | PED-----    | -----EEKK  | EFEE-----   | LKAAYEPLCK  | QIQEI-LGKR | VEKVAVSNRM  | TSSPCCIVTS   |
| TPP59511 FgigHSP90α      | LDPIDEYAVT  | QLREYDGKKL    | VCVTKEGLQL  | PED-----    | -----EEKK  | EFEE-----   | LKAAYEPLCK  | QIQEI-LGKR | VEKVAVSNRM  | TSSPCCIVTS   |
| XP_024345770 EgrahHSP90α | VDPIDEYAVP  | QLREYDGKKL    | VCVTKEGLEL  | PED-----    | -----EEKK  | RFEE-----   | VKASFEPTCK  | KIKDI-LGNK | VEKVTVSNRL  | TSSPCCIVTS   |
| CDI70178 EgrahHSP90α     | VDPIDEYAVP  | QLREYDGKKL    | VCVTKEGLEL  | PED-----    | -----EEKK  | RFEE-----   | VKASFEPTCK  | KIKDI-LGNK | VEKVTVSNRL  | TSSPCCIVTS   |
| CDS25067 EgrahHSP90      | VDFMDEYVNV  | AMTEYLGKSL    | VCVSRDLQL   | PEEKVEAVVA  | E----E-EKG | TTTQGEWMEC  | VVADFESTCG  | KMKEI-LGER | VESVRVSSRL  | TSSPCCVITS   |
| CDS39694 EmulHSP90       | VDFMDEYVNV  | AMTEYLGKSL    | VCVSRDLQL   | PEERVEAVVA  | EAAAAEEERK | TTTQGEWMEC  | VVADFESTCG  | KMKEI-LGER | VESVRVSSRL  | TSSPCCVITS   |
| CDS28179 HmichHSP90      | QGETRQRIIG  | MVISYEDMEL    | VDVSKMTREP  | ENNLN----   | -----EDYS  | KILD-----   | ---EYRFMLE  | KIKEL-LGDK | IVDLKISQVP  | LDVPCICIST-  |
| ApHSP90-1.1              | DTVIDQYIAD  | LIVSYADKKL    | VDVSATNFEM  | STDLEQ----  | -----DENL  | RISS-----   | ---EFESTCK  | SVRAI-LADQ | VEGVIVSNKL  | CDAPCCISAS   |
| ApHSP90-1.2              | -----       | -----         | -----       | -----       | -----      | -----       | -----       | -----      | -----       | -----        |
| ApHSP90-2.1              | NTKIDQSIQV  | MIVSYDNKEL    | VDVSATNFEM  | LNDLEQ----  | -----KENDK | RISS-----   | ---EFESTCK  | SIKKI-LANE | VEDVVVSNKI  | SYTPCCICISTS |
| ApHSP90-2.2              | NTKIDQSIQV  | MIVSYDNKEL    | VDVSATNFEM  | LNDLEQ----  | -----KENDK | RISS-----   | ---EFESTCK  | SIKKI-LANE | VEDVVVSNKI  | SYTPCCICISTS |
| ApHSP90-3                | SNPADYSFIC  | DKNCYKLYKI    | RSVGSYANIK  | ELS-----    | -----KEEER | EYRES-----  | -CVEFASTCS  | TMENY-YEGG | HASVVRVSRRL | VNSPCCAFVG   |
| ApHSP90-4                | CDPIDEYAVT  | QLREYDGKKL    | VCVTKEGLEL  | PED-----    | -----DEEKK | RFEE-----   | VKAAPFEPTCK | KIKDI-LGNK | VEKVVVSNRL  | VSSPCCIVTS   |
| ApHSP90-5.1              | TEPMDEYVMQ  | ALSEVKGKKT    | QNLAKGGLDL  | KLE-----    | -----KESKE | KFEE-----   | QERAFKPLTD  | WLRDKGLSGK | IKDAKISQRL  | DSSPCALVAD   |
| ApHSP90-5.2              | TEPMDEYVMQ  | ALSEVKGKKT    | QNLAKGGLDL  | KLE-----    | -----KESKE | KFEE-----   | QERAFKPLTD  | WLRDKGLSGK | IKDAKISQRL  | DSSPCALVAD   |
|                          | α20         | β14           |             |             |            | α21         |             | β15        |             | β16          |
|                          | 710         | 720           | 730         | 740         | 750        | 760         | 770         | 780        | 790         | 800          |
|                          | HSP90       |               |             |             |            |             |             |            |             |              |
| NP_005339 HsapHSP90α     | TYGWTANMER  | IMKAQALR--    | -DNSTMGYMA  | AKKHLEINPD  | HSIIETLRQK | AEA-DKNDKS  | VKDLVILLYE  | TALLSSGFSL | EDPQTHANRI  | YRMIKLGLGI   |
| NP_034610 MmusHSP90α     | TYGWTANMER  | IMKAQALR--    | -DNSTMGYMA  | AKKHLEINPD  | HSIIETLRQK | AEA-DKNDKS  | VKDLVILLYE  | TALLSSGFSL | EDPQTHANRI  | YRMIKLGLGI   |
| Q9GKX7 EcabHSP90α        | TYGWTANMER  | IMKAQALR--    | -DNSTMGYMA  | AKKHLEINPD  | HSIIETLRQK | AEA-DKNDKS  | VKDLVILLYE  | TALLSSGFSL | EDPQTHANRI  | YRMIKLGLGI   |
| THD20903 FhepHSP90α      | EFGWSANMER  | IMKAQALR--    | -DSSTMGYMA  | AKKHLEINPR  | HKIVQSLKSL | FEK-GESNKL  | AKDLVFLLYS  | TALLSSGFSL | EDPKVHSGRI  | HQLISMCLDI   |
| TPP59511 FgigHSP90α      | EFGWSANMER  | IMKAQALR--    | -DSSTMGYMA  | AKKHLEINPR  | HKIVQSLKSL | FEK-GESNKL  | AKDLVFLLYS  | TALLSSGFSL | EDPKVHSGRI  | HQLISMCLDI   |
| XP_024345770 EgrahHSP90α | TFGWSANMER  | IMKAQALR--    | -DSSTMGYMS  | AKKHLEINPD  | HKVMIRLKEM | LSAEGEPNKI  | CKDLINMLFS  | TALLASGFTL | EDPKAHANKI  | HELISMCLDI   |
| CDI70178 EgrahHSP90α     | TFGWSANMER  | IMKAQALR--    | -DSSTMGYMS  | AKKHLEINPD  | HKVMIRLKEM | LSAEGEPNKI  | CKDLINMLFS  | TALLASGFTL | EDPKAHANKI  | HELISMCLDI   |
| CDS25067 EgrahHSP90      | TFGWSANMQR  | IGKAQALR--    | -NPHSLRNNS  | AKKHLEINAN  | DSIIIGLKKM | LSATEGMPNKI | SRDMLEILYN  | TALLDSGFVL | KEPKTHTNTI  | HALIRMFLEI   |
| CDS39694 EmulHSP90       | TFGWSANMQR  | IGKAQALR--    | -NPHSLRNNS  | AKKHLEINAN  | DSIIIGLKKM | LSATEGMPNKI | SRDMLEILYN  | TALLDSGFVL | KEPKTHTNTI  | HALIRMFLEI   |
| CDS28179 HmichHSP90      | VEEVEVNV    | -----         | -----       | -----       | -----      | -----       | -----       | -----      | -----       | -----        |
| ApHSP90-1.1              | TEGISLNMAR  | ILKSQ-RG--    | -GDSSTTEKPA | SKKYFEINAK  | HPMINWLKKT | LDQEEESPSTA | SKNLVNMLYS  | AALLRSGNTL | ERPRSFTKLM  | YSFINMYLKE   |
| ApHSP90-1.2              | -----       | -----         | -----       | -----       | -----      | -----       | -----       | -----      | -----       | -----        |
| ApHSP90-2.1              | TEDASLNRVIS | ILKSPGRG--    | -DSSSTTKKPA | SKKYFEINPK  | DPIINRLKKM | LDQGESPNTS  | SKNIVNMLYS  | AALLRSGKTL | ERPHSFTKLM  | YNFVNMCLKE   |
| ApHSP90-2.2              | TEDASLNRVIS | ILKSPGRG--    | -DSSSTTKKPA | SKKYFEINPK  | DPIINRLKKM | LDQGESPNTS  | SKNIVNMLYS  | AALLRSGKTL | ERPHSFTKLM  | YNFVNMCLKE   |
| ApHSP90-3                | -----       | GK LPFGEPLK-- | -----       | PSSPRE      | EEVNFNPN   | HEVLIRLKEK  | CCNNDGNLNA  | YAPIINILLE | TALIDSGFMP  | PDPIRYADMV   |
| ApHSP90-4                | TFGWSANMER  | IMKAQALR--    | -DSSTMGYMS  | AKKHLEINPD  | HKVMIRLKEM | LSADGEPNKI  | CKDLINMLFS  | TALLTSGFTL | EDPKAHANKI  | HELISMCLDI   |
| ApHSP90-5.1              | EYMASGNFQK  | VMLSQAYGSI    | DPATNAYYLN  | QRTLEVNP    | HPLIKKLNEL | VQN-DPNDV   | AKENTMLLYD  | TAVLRSGFIM | QDLVGFAERI  | ERELRKNLVD   |
| ApHSP90-5.2              | EYMASGNFQK  | VMLSQAYGSI    | DPATNAYYLN  | QRTLEVNP    | HPLIKKLNEL | VQN-DPNDV   | AKENTMLLYD  | TAVLRSGFIM | QDLVGFAERI  | ERELRKNLVD   |
|                          | α22         |               | β17         |             | α23        |             | α24         |            | α25         |              |
|                          | 810         | 820           | 830         | 840         |            |             |             |            |             |              |
|                          | HSP90       |               |             |             |            |             |             |            |             |              |
| NP_005339 HsapHSP90α     | DEDDPTA--D  | DTSAAVTTEE--  | --MPFLEGDD  | DTSRMEEVD-- | -----      | -----       | -----       | -----      | -----       | -----        |
| NP_034610 MmusHSP90α     | DEDDPTV--D  | DTSAAVTTEE--  | --MPFLEGDD  | DTSRMEEVD-- | -----      | -----       | -----       | -----      | -----       | -----        |
| Q9GKX7 EcabHSP90α        | DEDDPTA--D  | DSSAAVTTEE--  | --MPFLEGDD  | DTSRMEEVD-- | -----      | -----       | -----       | -----      | -----       | -----        |
| THD20903 FhepHSP90α      | PTDDEMKT--T | DTPEVPSST--   | --ATPAEAGD  | D-AGMEEVD-- | -----      | -----       | -----       | -----      | -----       | -----        |
| TPP59511 FgigHSP90α      | PTDDEMKT--T | DTPEVPSST--   | --ATPAEAGD  | D-AGMEEVD-- | -----      | -----       | -----       | -----      | -----       | -----        |
| XP_024345770 EgrahHSP90α | PEDETMTK--E | EEKNTASSD--   | -VAAPVEAGD  | DGAAMEEVD-- | -----      | -----       | -----       | -----      | -----       | -----        |
| CDI70178 EgrahHSP90α     | PEDETMTK--E | EEKNTASSD--   | -VAAPVEAGD  | DGAAMEEVD-- | -----      | -----       | -----       | -----      | -----       | -----        |
| CDS25067 EgrahHSP90      | PECESVK--D  | AEQVTADSD--   | -EAALVQAGD  | DGGAMGEVG-- | -----      | -----       | -----       | -----      | -----       | -----        |
| CDS39694 EmulHSP90       | PECESVK--D  | AEQVTADSD--   | -EAALVQAGD  | DGGAMGEVG-- | -----      | -----       | -----       | -----      | -----       | -----        |
| CDS28179 HmichHSP90      | VKLTYSVDAE  | -----SKDE     | INYEIDSSPM  | NRLA-----   | -----      | -----       | -----       | -----      | -----       | -----        |
| ApHSP90-1.1              | HKEIMKATKE  | GIDEERSPGE    | FNFEIDSCPM  | NVLL-----   | -----      | -----       | -----       | -----      | -----       | -----        |
| ApHSP90-1.2              | -----       | -----         | -----       | -----       | -----      | -----       | -----       | -----      | -----       | -----        |
| ApHSP90-2.1              | QKEIKVATKE  | LLNENRSPKE    | FSLGINHCPK  | IVRKEKKSSW  | VRIYF      | -----       | -----       | -----      | -----       | -----        |
| ApHSP90-2.2              | HKEIMKATKE  | GIDEERSPGE    | FNFEIDSCPM  | NVLL-----   | -----      | -----       | -----       | -----      | -----       | -----        |
| ApHSP90-3                | SKTTEMPKET  | EERALYSEST    | --SSPFLAAD  | KGGDVCCTP-- | -----      | -----       | -----       | -----      | -----       | -----        |
| ApHSP90-4                | PEDETMTKDV  | EEKANATTEG    | GATAPIEAGD  | DGAAMEEVD-- | -----      | -----       | -----       | -----      | -----       | -----        |
| ApHSP90-5.1              | DVAEQVEPDD  | SIPEPVEDEK    | -KEESSEQAE  | PMDVKEEL--  | -----      | -----       | -----       | -----      | -----       | -----        |
| ApHSP90-5.2              | DVAEQVEPDD  | SIPEPVEDEK    | -KEESSEQAE  | PMDVKEEL--  | -----      | -----       | -----       | -----      | -----       | -----        |

**Supplement Figure S3-Continued 3.** Multiple sequence alignment of the 5 (including isoforms of each) novel *A. perfoliata* Heat Shock Protein 90 alpha (HSP90 alpha/α) sequences with recognised HSP90 alpha isoforms BLAST hits sequences. The secondary protein structure prediction the HSP90 alpha characteristic structure using the PSIPRED Protein Analysis Workbench (presented below the alignment). Each β-strand or α-helix is numbered and shaded in yellow (β-strand) and pink (α-helix). The domain analysis of C-terminal and N-terminal domain of HSP90 alpha isoforms using SMART tools is boxed in blue and red, respectively. Unique cytosolic HSP90, MEEVD peptide sequences are in green type and the unique cytosolic HSP90 alpha, LIP and EDD peptide sequences are shaded in green (Chen et al., 2006; Skantar & Carta, 2004).
