# Supplementary material for: Evidence of Immune Modulators in the Secretome of the Equine Tapeworm Anoplocephala perfoliata
Source: MDPI journal article supplement (doi:10.3390/pathogens10070912), 2021-07-20
Supplement: s1 [file s1]

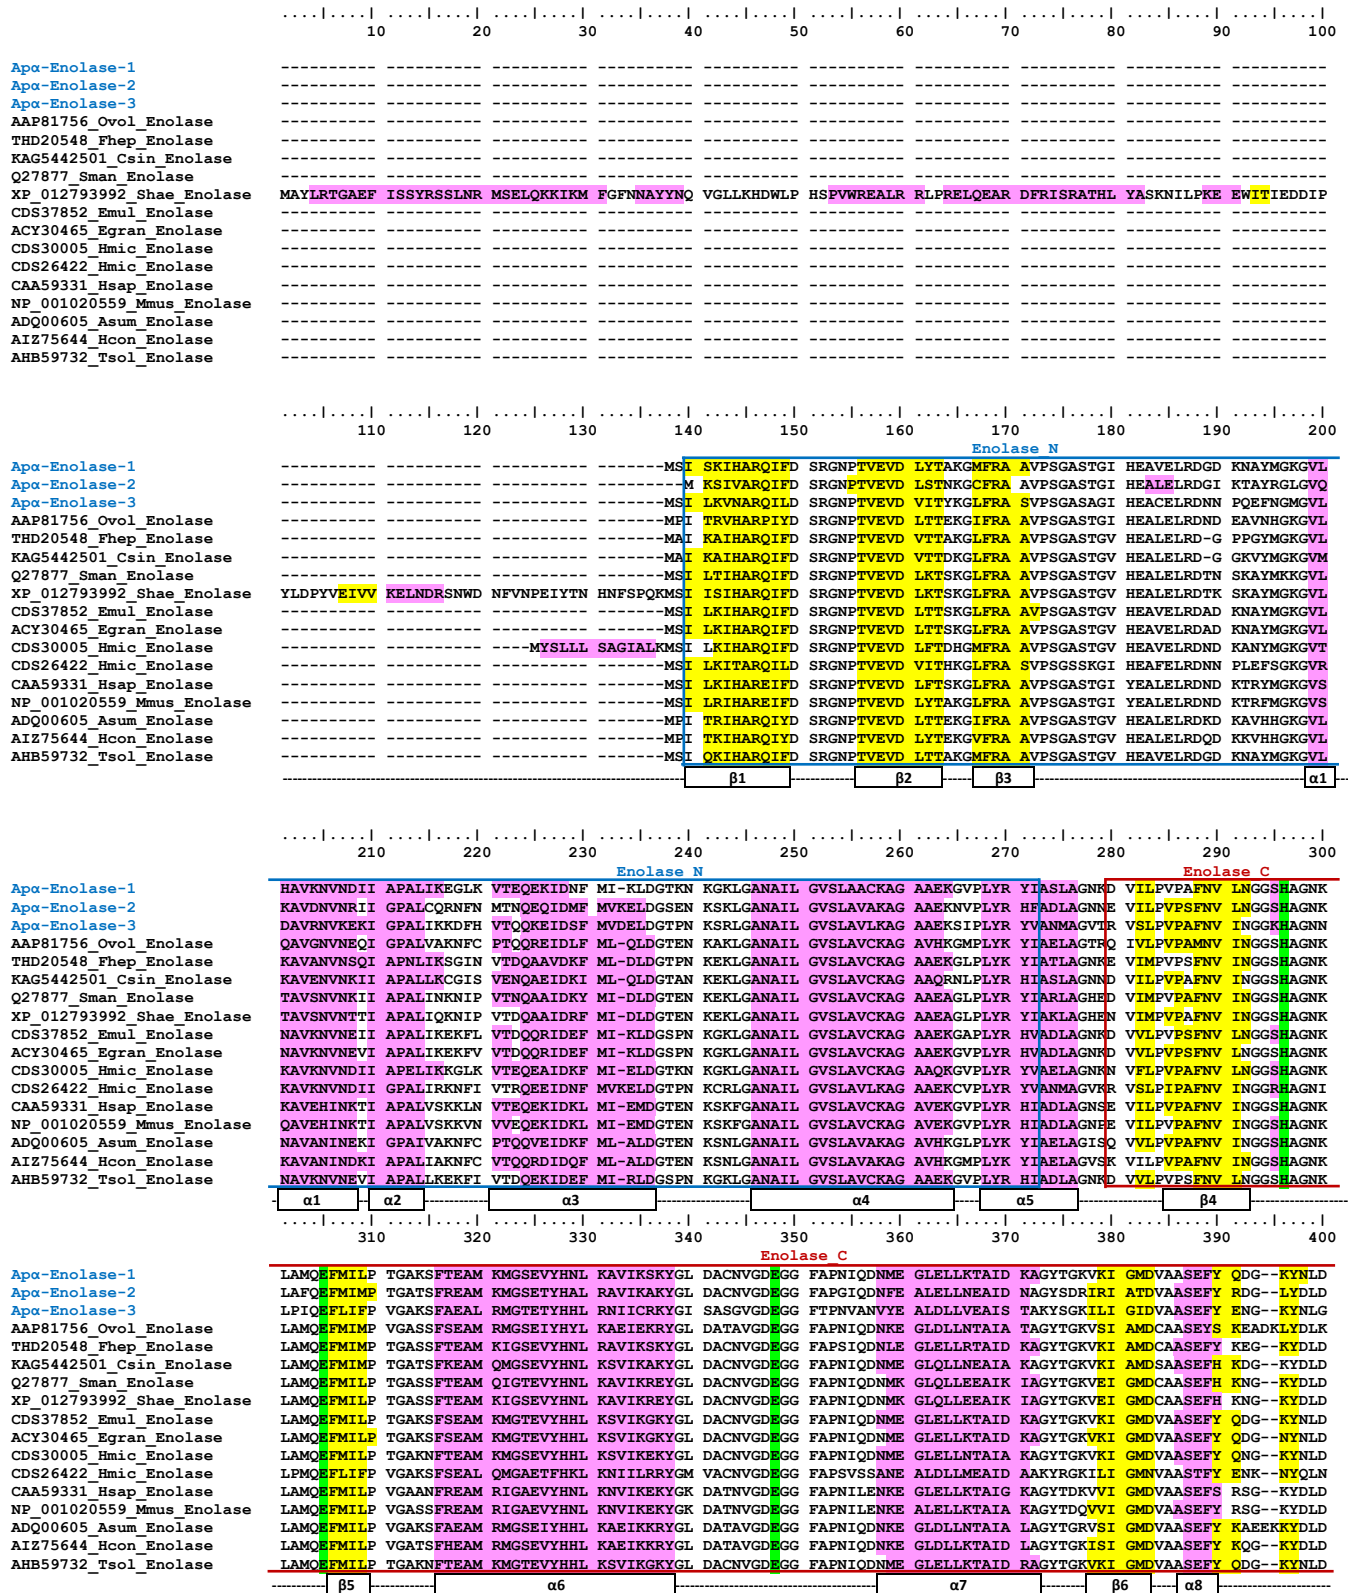

**Supplementary Figure S4.** Multiple sequence alignment of the 11 novel  $\alpha$ -Enolase from *Anoplocephala perfoliata* (Apa-Enolase-1, 2 and 3). Secondary protein structure prediction using the PSIPRED Protein Analysis Workbench is presented below the alignment and comprises of 10  $\beta$ -strands and 15  $\alpha$ -helices, highlighted in yellow and pink, respectively. The 5 essential residues necessary for proper catalytic function are highlighted in green (Pancholi, 2001). The predicted N- and C-terminal Enolase domain profiles are indicated by blue- and red-boxes, respectively.
