# Supplementary material for: Evidence of Immune Modulators in the Secretome of the Equine Tapeworm Anoplocephala perfoliata
Source: Pathogens. 2021 Jul 20;10(7):912. doi: 10.3390/pathogens10070912 (PMC8308605; doi:10.3390/pathogens10070912)
Supplement: Supplementary file 1 [file pathogens-10-00912-s001.zip]

Archive with 9 entries (9 files):
- Supplementary Figure S1. Summary of the distribution of GO terms in the novel adult A. perfoliata transcriptome at level 3.pdf
- Supplementary Figure S2. A. perfoliata Sigma class GST multiple sequences alignment and secondary structure prediction.pdf
- Supplementary Figure S3. A. perfoliata Heat shock Protein alpha multiple sequences alignment and secondary structure prediction.pdf
- Supplementary Figure S4. A. perfoliata alpha Enolase multiple sequences alignment and secondary structure prediction.pdf
- Supplementary Figure S5. Protein profiles of A. perfoliata.pdf
- Supplementary Figure S6. Gene enrichment analysis of A perfoliata proteomics datasets.pdf
- Supplementary Table S1. Immune modulators for transcriptome and proteome analysis.xlsx
- Supplementary Table S2-S4. The full list of proteins identified in A. perfoliata secretome proteomics dataset.xlsx
- Supplementary Table S5. Protein sequences of recognised Sigma class GST, HSP90 family and alpha-Enolases.xlsx
