# Supplementary material for: Evidence of Immune Modulators in the Secretome of the Equine Tapeworm Anoplocephala perfoliata
Source: Pathogens. 2021 Jul 20;10(7):912. doi: 10.3390/pathogens10070912 (PMC8308605; doi:10.3390/pathogens10070912)
Supplement: Supplementary file 1 [file pathogens-10-00912-s001.zip › Supplementary Table S1. Immune modulators for transcriptome and proteome analysis.xlsx]

## Sheet: Table S1. Immune modulators
Supplementary Table S1. Immune modulator bait sequences for trancriptome and proteome analysis and contig ID hits from the A. perfoliata transcriptome analysis. The top 5 translated hits (in the legend) from each bait sequence were confirmed using PFAM, and the hits have >70% functional domains are shaded in green or <70% functional domains are shaded in yellow.
Name of bait sequence	Total Hits found in transcriptome database	Hits Contig ID	Description
Schistosoma mansoni Calpain 1 (Smp_214180)	14	DN4288_c0_g1_i1_31793	calpain
		DN8134_c0_g1_i2_2225	calpain
		DN9786_c0_g1_i2_72693	calpain A
		DN9786_c0_g1_i1_72692	calpain A
		DN8870_c0_g2_i5_9689	calpain A
		DN11280_c0_g3_i1_60806	calpain A
		DN11727_c0_g1_i2_61275	family C2 unassigned peptidase (C02 family)
		DN10504_c0_g1_i5_29015	family C2 unassigned peptidase (C02 family)
		DN10213_c0_g1_i1_1219	family C2 unassigned peptidase (C02 family)
		DN10504_c0_g1_i8_29017	family C2 unassigned peptidase (C02 family)
		DN10504_c0_g1_i2_29012	family C2 unassigned peptidase (C02 family)
		DN12669_c0_g1_i4_72035	family C2 unassigned peptidase (C02 family)
		DN10504_c0_g1_i4_29013	family C2 unassigned peptidase C02 family
		DN10504_c0_g1_i7_29016	family C2 unassigned peptidase (C02 family)
Schistosoma mansoni Calpain 2 (Smp_137410)	19	DN9786_c0_g1_i2_72693	calpain A
		DN9786_c0_g1_i1_72692	calpain A
		DN11727_c0_g1_i2_61275	family C2 unassigned peptidase (C02 family)
		DN8870_c0_g2_i5_9689	calpain A
		DN11280_c0_g3_i1_60806	calpain A
		DN10504_c0_g1_i5_29015	family C2 unassigned peptidase (C02 family)
		DN10213_c0_g1_i1_1219	family C2 unassigned peptidase (C02 family)
		DN4288_c0_g1_i1_31793	calpain
		DN10504_c0_g1_i8_29017	family C2 unassigned peptidase (C02 family)
		DN8134_c0_g1_i2_2225	calpain
		DN10504_c0_g1_i2_29012	family C2 unassigned peptidase (C02 family)
		DN6578_c0_g1_i1_66215	calpain C (C02 family)
		DN12669_c0_g1_i4_72035	family C2 unassigned peptidase (C02 family)
		DN6578_c0_g3_i1_66217	Uncharacterised
		DN12524_c0_g1_i1_33698	calpain C (C02 family)
		DN15546_c0_g1_i1_70302	Uncharacterised
		DN10504_c0_g1_i4_29013	family C2 unassigned peptidase C02 family
		DN10504_c0_g1_i7_29016	family C2 unassigned peptidase (C02 family)
		DN12669_c0_g1_i8_72036	family C2 unassigned peptidase (C02 family)
Schistosoma mansoni TSP2 (Smp_335630)	37	DN12118_c0_g3_i5_41623	Leukocyte surface antigen CD51
		DN10515_c0_g1_i10_29170	Leukocyte surface antigen CD51
		DN11070_c1_g1_i4_16427	Leukocyte surface antigen CD51
		DN12587_c0_g3_i1_73053	Leukocyte surface antigen CD51
		DN10391_c0_g1_i10_3751	Leukocyte surface antigen CD51
		DN11950_c0_g1_i3_46360	Uncharacterised
		DN12118_c0_g2_i1_41622	Leukocyte surface antigen CD51
		DN10515_c0_g1_i7_29168	Leukocyte surface antigen CD51
		DN10515_c0_g1_i4_29167	Leukocyte surface antigen CD51
		DN10619_c0_g1_i7_33102	Leukocyte surface antigen CD51
		DN11070_c1_g3_i3_16431	Leukocyte surface antigen CD51
		DN11070_c1_g1_i5_16429	Leukocyte surface antigen CD51
		DN10391_c0_g1_i15_3758	Leukocyte surface antigen CD51
		DN10391_c0_g1_i6_3750	Leukocyte surface antigen CD51
		DN10391_c0_g1_i3_3749	Leukocyte surface antigen CD51
		DN10391_c0_g1_i13_3756	Leukocyte surface antigen CD51
		DN9883_c0_g1_i1_76430	integral membrane protein
		DN11551_c0_g1_i6_61981	Leukocyte surface antigen CD51
		DN10391_c0_g1_i2_3748	Leukocyte surface antigen CD51
		DN12587_c0_g3_i2_73055	Leukocyte surface antigen CD51
		DN10619_c0_g1_i2_33101	Leukocyte surface antigen CD51
		DN10391_c0_g1_i14_3757	Leukocyte surface antigen CD51
		DN11551_c0_g3_i1_61980	Leukocyte surface antigen CD51
		DN10391_c0_g2_i4_3755	Leukocyte surface antigen CD51
		DN10391_c0_g1_i17_3759	Leukocyte surface antigen CD52
		DN9904_c0_g1_i4_4304	Uncharacterised
		DN10391_c0_g1_i20_3761	Leukocyte surface antigen CD51
		DN11950_c0_g1_i2_46359	Uncharacterised
		DN552_c0_g1_i2_19396	Uncharacterised
		DN12118_c0_g1_i3_41624	Leukocyte surface antigen CD51
		DN9477_c0_g1_i2_44187	Uncharacterised
		DN11397_c0_g1_i1_39146	Uncharacterised
		DN10391_c0_g2_i2_3752	Leukocyte surface antigen CD52
		DN11195_c0_g1_i1_62399	cd63 antigen
		DN5365_c0_g1_i1_10846	CD9 antigen
		DN10465_c0_g1_i1_8632	Leukocyte surface antigen CD53
		DN8619_c0_g1_i2_38952	tetraspanin, putative
Schistosoma mansoni Sm23 transmembrane protein (Smp_017430)	47	DN11950_c0_g1_i3_46360	Uncharacterised
		DN11950_c0_g1_i2_46359	Uncharacterised
		DN5933_c0_g1_i1_30778	Uncharacterised
		DN9904_c0_g1_i4_4304	Uncharacterised
		DN10515_c0_g1_i7_29168	Leukocyte surface antigen CD52
		DN10515_c0_g1_i4_29167	Leukocyte surface antigen CD52
		DN12118_c0_g3_i5_41623	Leukocyte surface antigen CD52
		DN10515_c0_g1_i10_29170	Leukocyte surface antigen CD52
		DN11070_c1_g3_i3_16431	Leukocyte surface antigen CD52
		DN10391_c0_g1_i15_3758	Leukocyte surface antigen CD52
		DN10391_c0_g1_i6_3750	Leukocyte surface antigen CD52
		DN11070_c1_g1_i4_16427	Leukocyte surface antigen CD52
		DN10391_c0_g1_i3_3749	Leukocyte surface antigen CD52
		DN10619_c0_g1_i2_33101	Leukocyte surface antigen CD52
		DN10391_c0_g1_i13_3756	Leukocyte surface antigen CD52
		DN12118_c0_g2_i1_41622	Leukocyte surface antigen CD52
		DN9883_c0_g1_i1_76430	integral membrane protein
		DN11070_c1_g1_i5_16429	Leukocyte surface antigen CD52
		DN10391_c0_g1_i10_3751	Leukocyte surface antigen CD52
		DN11551_c0_g1_i6_61981	Leukocyte surface antigen CD52
		DN12587_c0_g3_i2_73055	Leukocyte surface antigen CD52
		DN12587_c0_g3_i1_73053	Leukocyte surface antigen CD52
		DN10619_c0_g1_i7_33102	Leukocyte surface antigen CD52
		DN10391_c0_g1_i14_3757	Leukocyte surface antigen CD52
		DN9477_c0_g1_i2_44187	Uncharacterised
		DN8619_c0_g1_i2_38952	tetraspanin, putative
		DN5365_c0_g1_i1_10846	CD9 antigen
		DN9532_c0_g1_i2_51092	CD81 antigen
		DN11551_c0_g3_i1_61980	Leukocyte surface antigen CD52
		DN10391_c0_g2_i4_3755	Leukocyte surface antigen CD52
		DN9532_c0_g1_i7_51095	proteasome subunit beta 3 (T01 family)
		DN9532_c0_g1_i4_51094	CD81 antigen
		DN9532_c0_g1_i3_51093	Uncharacterised
		DN9503_c0_g1_i1_40430	proteasome subunit beta 3 (T01 family)
		DN9046_c0_g1_i2_22095	CD81 antigen
		DN9174_c0_g1_i3_6499	CD81 antigen
		DN552_c0_g1_i2_19396	Uncharacterised
		DN11482_c0_g1_i12_70165	CD81 antigen
		DN9753_c0_g1_i5_33490	CD81 antigen
		DN11331_c0_g2_i2_50080	CD63 antigen
		DN10391_c0_g1_i20_3761	Leukocyte surface antigen CD52
		DN11397_c0_g1_i1_39146	Uncharacterised
		DN10391_c0_g1_i2_3748	Leukocyte surface antigen CD52
		DN11195_c0_g1_i1_62399	cd63 antigen
		DN14404_c0_g1_i1_11435	Leukocyte surface antigen CD53
		DN11716_c0_g1_i3_48093	CD63 antigen
		DN12118_c0_g1_i3_41624	Leukocyte surface antigen CD52
Schistosoma mansoni Cathepsin B (Smp_085180)	2	DN9013_c0_g2_i3_9574	cathepsin b
		DN6585_c0_g1_i2_52284	cathepsin b
Schistosoma mansoni Cathepsin D (Smp_013040)	1	DN1780_c0_g1_i1_17249	cathepsin d (lysosomal aspartyl protease)
Fasciola hepatica Cathepsin L Peptidase	27	DN10215_c0_g1_i10_1389	cysteine protease
		DN10215_c0_g1_i8_1388	cysteine protease
		DN12594_c0_g1_i4_73468	cathepsin L cysteine protease
		DN11706_c0_g1_i7_61136	cathepsin L cysteine protease
		DN12173_c0_g1_i11_41498	cathepsin L cysteine protease
		DN11240_c0_g1_i6_23221	Cathepsin L
		DN7738_c0_g1_i2_11006	cathepsin l cysteine peptidase
		DN12173_c0_g1_i1_41495	cathepsin L cysteine protease
		DN12173_c0_g1_i6_41497	cathepsin L cysteine protease
		DN12304_c0_g1_i1_64829	cathepsin L
		DN11240_c0_g1_i2_23219	cathepsin L cysteine protease
		DN10564_c0_g1_i3_29100	cathepsin L cysteine protease
		DN9682_c0_g2_i1_7975	cathepsin L
		DN11240_c0_g1_i3_23220	cysteine protease
		DN10880_c0_g1_i3_49012	Cathepsin L-like proteinase
		DN10880_c0_g1_i2_49011	Cathepsin L-like proteinase
		DN10880_c0_g1_i4_49013	Cathepsin L-like proteinase
		DN10880_c0_g1_i5_49014	Cathepsin L-like proteinase
		DN10564_c0_g1_i5_29101	cysteine protease
		DN9624_c0_g1_i2_20819	Cathepsin L
		DN12594_c0_g1_i10_73469	Cathepsin L
		DN7191_c0_g1_i1_59474	Uncharacterised
		DN10564_c0_g2_i2_29102	cysteine protease
		DN7738_c0_g1_i1_11005	Uncharacterised
		DN12594_c0_g1_i2_73466	Uncharacterised
		DN11706_c0_g1_i3_61135	Uncharacterised
		DN10215_c0_g1_i4_1387	Uncharacterised
Fasciola hepatica Cathepsin 2L Peptidase	27	DN10215_c0_g1_i10_1389	cysteine protease
		DN11706_c0_g1_i7_61136	cathepsin L cysteine protease
		DN12594_c0_g1_i4_73468	cathepsin L cysteine protease
		DN10215_c0_g1_i8_1388	cysteine protease
		DN12173_c0_g1_i11_41498	cathepsin L cysteine protease
		DN7738_c0_g1_i2_11006	cathepsin l cysteine peptidase
		DN11240_c0_g1_i6_23221	Cathepsin L
		DN12173_c0_g1_i1_41495	cathepsin L cysteine protease
		DN12173_c0_g1_i6_41497	cathepsin L cysteine protease
		DN12304_c0_g1_i1_64829	cathepsin L
		DN11240_c0_g1_i2_23219	cathepsin L cysteine protease
		DN10564_c0_g1_i3_29100	cathepsin L cysteine protease
		DN11240_c0_g1_i3_23220	cysteine protease
		DN9682_c0_g2_i1_7975	cathepsin L
		DN10880_c0_g1_i3_49012	Cathepsin L-like proteinase
		DN10880_c0_g1_i2_49011	Cathepsin L-like proteinase
		DN10880_c0_g1_i4_49013	Cathepsin L-like proteinase
		DN10880_c0_g1_i5_49014	Cathepsin L-like proteinase
		DN10564_c0_g1_i5_29101	cysteine protease
		DN9624_c0_g1_i2_20819	Cathepsin L
		DN12594_c0_g1_i10_73469	Cathepsin L
		DN10564_c0_g2_i2_29102	cysteine protease
		DN7191_c0_g1_i1_59474	Uncharacterised
		DN7738_c0_g1_i1_11005	Uncharacterised
		DN12594_c0_g1_i2_73466	Uncharacterised
		DN10215_c0_g1_i4_1387	Uncharacterised
		DN11706_c0_g1_i3_61135	Uncharacterised
Schistosoma mansoni Leucine aminopeptidase 1 (Smp_030000)	3	DN8903_c0_g1_i1_52178	Putative aminopeptidase W07G4.4
		DN11744_c0_g1_i1_48021	Putative aminopeptidase W07G4.2
		DN11744_c0_g1_i2_48022	leucyl aminopeptidase
Schistosoma mansoni Leucine aminopeptidase 2 (Smp_083870)	3	DN8903_c0_g1_i1_52178	Putative aminopeptidase W07G4.4
		DN11744_c0_g1_i1_48021	Putative aminopeptidase W07G4.3
		DN11744_c0_g1_i2_48022	leucyl aminopeptidase
Schistosoma mansoni Arginase (Smp_059980)	6	DN10464_c0_g1_i2_59297	agmatinase mitochondrial-like
		DN11086_c0_g1_i4_42134	agmatinase mitochondrial-like
		DN11086_c0_g1_i2_42133	agmatinase mitochondrial-like
		DN11086_c0_g1_i6_42135	agmatinase mitochondrial-like
		DN9955_c0_g1_i1_17555	agmatinase mitochondrial-like
		DN9485_c0_g1_i1_31367	agmatinase mitochondrial-like
Schistosoma mansoni BMP (Smp_343950)	1	DN15780_c0_g1_i1_57523	bone morphogenetic protein 2
Schistosoma mansoni Acetylcholinesterase (Smp_154600)	7	DN10838_c0_g1_i1_62967	acetylcholinesterase
		DN11171_c0_g1_i1_62356	BC026374 protein (S09 family)
		DN11307_c0_g1_i1_39219	acetylcholinesterase
		DN5821_c0_g1_i2_36524	Neuroligin-4, Y-linked
		DN6095_c0_g2_i1_68248	Neuroligin-4, Y-linked
		DN5090_c0_g2_i1_63985	Uncharacterised
		DN12839_c0_g1_i1_18179	Uncharacterised
Nippostrongylus brasiliensis Acetylcholinesterase	6	DN10838_c0_g1_i1_62967	acetylcholinesterase
		DN11171_c0_g1_i1_62356	BC026374 protein (S09 family)
		DN5821_c0_g1_i2_36524	Neuroligin-4, Y-linked
		DN5090_c0_g2_i1_63985	Uncharacterised
		DN6095_c0_g2_i1_68248	Neuroligin-4, Y-linked
		DN12839_c0_g1_i1_18179	Uncharacterised
Schistosoma mansoni Phosphatidylserine decarboxylase proenzyme 1 (Smp_021830)	4	DN6014_c0_g1_i2_68245	Phosphatidylserine decarboxylase proenzyme
		DN6014_c0_g1_i1_68244	Phosphatidylserine decarboxylase proenzyme
		DN979_c0_g1_i1_39046	phosphatidylserine decarboxylase proenzyme
		DN13199_c0_g1_i1_36812	phosphatidylserine decarboxylase proenzyme
Schistosoma mansoni Phosphatidylserine synthase 1 (Smp_127890)	1	DN6150_c0_g1_i2_49591	phosphatidylserine synthase 1
Schistosoma mansoni Phosphatidylserine synthase 2 (Smp_125780)	1	DN6150_c0_g1_i2_49591	phosphatidylserine synthase 0
Schistosoma mansoni Serpin (Serine protease inhibitor) (Smp_090080)	4	DN12464_c0_g1_i3_71373	unnamed protein product
		DN10645_c0_g1_i6_57768	serine protease inhibitor
		DN5832_c0_g1_i1_36564	Serpin B8
		DN11133_c0_g2_i3_24057	serine protease inhibitor
Schistosoma mansoni Superoxide dismutases (SODs) (Smp_176200)	1	DN7926_c0_g1_i1_57618	Superoxide dismutase [Cu-Zn]
Schistosoma mansoni Glutathione-S-transferase 28 kD (GST 28) (Smp_306860)	2	DN3993_c0_g1_i1_58938	glutathione S-transferase class-mu 28 kda isozyme
	2	DN10944_c0_g1_i2_40229	ADP ribosylation factor 2
Schistosoma mansoni Glutathione-S-transferase 26 kD (GST 26) (Smp_163610)	227	DN10359_c1_g2_i1_29384	Glutathione S-transferase
		DN10325_c1_g7_i1_3824	Glutathione S-transferase
		DN11650_c5_g1_i4_54174	Glutathione S-transferase
		DN12274_c0_g2_i15_43535	Glutathione S-transferase
		DN12275_c2_g2_i1_68703	Glutathione S-transferase
		DN11163_c0_g1_i6_24147	Glutathione S-transferase
		DN12314_c2_g1_i19_39898	Glutathione S-transferase
		DN10638_c0_g6_i5_32860	glutathione S-transferase
		DN10325_c1_g6_i3_3823	Glutathione S-transferase
		DN12314_c2_g1_i14_39894	Glutathione S-transferase
		DN10325_c1_g2_i3_3822	Glutathione S-transferase
		DN12623_c0_g1_i17_72318	glutathione S-transferase
		DN11163_c0_g2_i3_24146	Glutathione S-transferase
		DN12352_c0_g1_i3_39500	glutathione S-transferase
		DN11457_c1_g2_i8_56894	glutathione S-transferase
		DN11163_c0_g3_i11_24148	Glutathione S-transferase
		DN10373_c1_g1_i10_3783	glutathione S-transferase
		DN10661_c0_g2_i2_33176	glutathione S-transferase
		DN11251_c0_g1_i1_23156	glutathione S-transferase
		DN12623_c0_g1_i7_72307	glutathione S-transferase
		DN11200_c0_g3_i1_23022	glutathione S-transferase
		DN12470_c0_g2_i3_71479	glutathione S-transferase
		DN12274_c0_g2_i9_43530	glutathione S-transferase
		DN11692_c1_g2_i7_54163	glutathione S-transferase
		DN11692_c1_g3_i1_54158	glutathione S-transferase
		DN12344_c0_g1_i10_39404	Glutathione S-transferase
		DN11163_c0_g1_i4_24144	Glutathione S-transferase
		DN11457_c0_g1_i3_56887	Glutathione S-transferase
		DN12352_c0_g1_i16_39505	glutathione S-transferase
		DN12425_c1_g4_i1_71592	Glutathione S-transferase
		DN12274_c0_g2_i11_43533	Glutathione S-transferase
		DN12129_c0_g1_i2_41717	Glutathione S-transferase
		DN12274_c0_g3_i4_43536	glutathione S-transferase
		DN12129_c0_g1_i15_41722	Glutathione S-transferase
		DN12470_c0_g1_i10_71477	glutathione S-transferase
		DN11740_c0_g1_i7_61456	glutathione S-transferase
		DN12425_c1_g1_i8_71597	glutathione S-transferase
		DN12352_c0_g1_i15_39504	glutathione S-transferase
		DN11457_c1_g2_i12_56895	glutathione S transferase
		DN12425_c1_g1_i2_71593	Glutathione S-transferase
		DN12685_c0_g1_i4_72099	Glutathione S-transferase
		DN12344_c0_g1_i21_39408	Glutathione S-transferase
		DN10661_c0_g1_i5_33175	Glutathione S-transferase
		DN11163_c0_g1_i5_24145	Glutathione S-transferase
		DN11740_c0_g2_i7_61457	Glutathione S-transferase
		DN12314_c2_g1_i11_39892	glutathione S-transferase
		DN12623_c0_g1_i12_72311	Glutathione S-transferase
		DN11650_c5_g1_i13_54177	Glutathione S-transferase
		DN10452_c0_g1_i1_8685	Glutathione S-transferase
		DN12470_c0_g1_i3_71475	glutathione S-transferase
		DN10373_c1_g1_i9_3782	glutathione S-transferase
		DN11457_c1_g2_i3_56890	glutathione S-transferase
		DN12334_c0_g2_i1_39606	Glutathione S-transferase
		DN11200_c0_g1_i27_23029	Glutathione S-transferase
		DN12623_c0_g1_i5_72305	Glutathione S-transferase
		DN12623_c0_g1_i4_72303	Glutathione S-transferase
		DN10373_c1_g2_i8_3787	Glutathione S-transferase
		DN11251_c0_g1_i6_23158	Glutathione S-transferase
		DN12352_c0_g1_i9_39503	glutathione S-transferase
		DN11200_c0_g1_i24_23028	glutathione S-transferase
		DN10786_c1_g2_i11_10292	Glutathione S-transferase
		DN10359_c1_g1_i20_29386	Glutathione S-transferase
		DN11692_c1_g2_i3_54159	glutathione S-transferase
		DN11163_c0_g4_i3_24150	glutathione S-transferase
		DN10786_c1_g2_i7_10291	Glutathione S-transferase
		DN12623_c0_g3_i7_72309	glutathione S-transferase
		DN12274_c0_g3_i1_43531	glutathione S-transferase
		DN11298_c0_g3_i8_22780	glutathione S-transferase
		DN10373_c1_g1_i7_3781	glutathione S transferase
		DN11740_c0_g2_i11_61459	Glutathione S-transferase
		DN11200_c0_g1_i16_23021	Glutathione S-transferase
		DN12300_c0_g1_i26_39706	glutathione S-transferase
		DN12300_c0_g1_i9_39697	Glutathione S-transferase
		DN11163_c0_g3_i3_24140	Glutathione S-transferase
		DN12115_c1_g1_i5_41734	Glutathione S-transferase
		DN12344_c0_g1_i11_39405	Glutathione S-transferase
		DN12623_c0_g1_i11_72310	Glutathione S-transferase
		DN12623_c0_g1_i8_72308	Glutathione S-transferase
		DN11692_c1_g1_i7_54162	Glutathione S-transferase
		DN11692_c1_g2_i2_54157	glutathione S transferase mu 2
		DN11200_c0_g3_i2_23026	glutathione S transferase
		DN12129_c0_g1_i5_41719	glutathione S-transferase
		DN12623_c0_g1_i1_72301	Glutathione S-transferase
		DN11163_c0_g3_i8_24143	Glutathione S-transferase
		DN12129_c0_g1_i16_41723	Glutathione S-transferase
		DN11457_c1_g2_i6_56892	Uncharacterised
		DN12344_c0_g1_i20_39407	Glutathione S-transferase
		DN10661_c0_g1_i8_33177	Glutathione S-transferase
		DN10916_c0_g1_i1_14307	Glutathione S-transferase
		DN11457_c1_g2_i2_56889	glutathione S-transferase
		DN11200_c0_g1_i7_23018	glutathione S-transferase
		DN10764_c0_g1_i12_10262	glutathione S-transferase
		DN10373_c1_g1_i11_3785	glutathione S-transferase
		DN12274_c0_g2_i1_43527	Glutathione S-transferase
		DN11127_c1_g3_i1_24349	glutathione S-transferase
		DN11802_c0_g1_i2_55995	Glutathione S-transferase
		DN11200_c0_g1_i15_23020	glutathione S-transferase
		DN12300_c0_g1_i10_39698	glutathione S-transferase
		DN12314_c2_g1_i15_39895	Glutathione S-transferase
		DN12685_c0_g1_i13_72104	Glutathione S-transferase
		DN12662_c0_g1_i1_71915	glutathione S-transferase
		DN11251_c0_g1_i4_23157	Glutathione S-transferase
		DN11802_c0_g1_i1_55994	Glutathione S-transferase
		DN12344_c0_g1_i18_39406	Glutathione S-transferase
		DN10764_c0_g1_i15_10263	glutathione S-transferase
		DN11127_c0_g1_i1_24345	Glutathione S-transferase
		DN10764_c0_g1_i3_10259	glutathione S-transferase
		DN12623_c0_g1_i6_72306	Glutathione S-transferase
		DN12300_c0_g1_i25_39705	glutathione S-transferase
		DN12314_c2_g1_i16_39896	Glutathione S-transferase
		DN12274_c0_g2_i10_43532	glutathione S-transferase
		DN12662_c0_g1_i13_71921	glutathione S-transferase
		DN11298_c0_g3_i4_22779	glutathione S-transferase
		DN11200_c0_g1_i14_23019	glutathione S-transferase
		DN12274_c0_g2_i7_43528	glutathione S-transferase
		DN10916_c0_g1_i2_14308	glutathione S-transferase
		DN10764_c0_g1_i19_10264	glutathione S-transferase
		DN10373_c1_g2_i2_3780	glutathione S-transferase
		DN10373_c1_g2_i1_3779	glutathione S-transferase
		DN11457_c1_g2_i13_56896	Uncharacterised
		DN10373_c1_g2_i11_3788	Glutathione S-transferase
		DN12300_c0_g1_i30_39709	glutathione S-transferase
		DN12662_c0_g1_i10_71920	glutathione S-transferase
		DN12300_c0_g1_i8_39696	glutathione S-transferase
		DN12115_c0_g4_i2_41732	glutathione S-transferase
		DN12300_c0_g1_i19_39702	glutathione S-transferase
		DN12300_c0_g1_i21_39703	Glutathione S-transferase
		DN10327_c0_g1_i4_29600	Glutathione S-transferase
		DN10671_c2_g1_i9_7021	glutathione S transferase
		DN12115_c0_g1_i3_41733	Glutathione S-transferase
		DN12334_c0_g1_i3_39608	Glutathione S-transferase
		DN10916_c0_g1_i8_14312	glutathione S transferase
		DN11127_c1_g1_i3_24347	Glutathione S-transferase
		DN10325_c1_g1_i6_3821	Glutathione S-transferase
		DN11251_c0_g1_i8_23159	Glutathione S-transferase
		DN10916_c0_g1_i6_14310	Glutathione S-transferase
		DN11163_c0_g3_i12_24149	glutathione S-transferase
		DN10622_c0_g1_i3_33160	glutathione S-transferase
		DN10359_c1_g1_i13_29383	glutathione S transferase mu 2
		DN10373_c1_g4_i1_3786	glutathione S-transferase
		DN12300_c0_g1_i2_39694	glutathione S-transferase
		DN12300_c0_g1_i23_39704	glutathione S-transferase
		DN12685_c0_g2_i1_72100	glutathione S-transferase
		DN12274_c0_g1_i3_43529	Glutathione S-transferase
		DN12275_c2_g2_i7_68713	Glutathione S-transferase
		DN10359_c1_g1_i3_29380	glutathione S-transferase
		DN11740_c0_g1_i10_61458	glutathione S transferase
		DN11692_c1_g1_i8_54164	Glutathione S-transferase
		DN10373_c1_g2_i5_3784	Glutathione S-transferase
		DN10679_c0_g1_i2_32993	glutathione S transferase
		DN10359_c1_g1_i23_29387	glutathione S-transferase
		DN12300_c0_g1_i34_39711	Uncharacterised
		DN11200_c0_g2_i1_23017	glutathione S-transferase
		DN12685_c0_g1_i8_72102	glutathione S-transferase
		DN12300_c0_g1_i29_39708	glutathione S-transferase
		DN12300_c0_g1_i4_39695	glutathione S-transferase
		DN12623_c0_g1_i13_72313	Glutathione S-transferase
		DN10764_c0_g1_i20_10265	glutathione S-transferase
		DN11163_c0_g4_i1_24142	glutathione S-transferase
		DN10638_c0_g2_i8_32863	Glutathione S-transferase
		DN11298_c0_g4_i5_22781	glutathione S transferase
		DN10764_c0_g1_i6_10261	glutathione S-transferase
		DN11802_c1_g3_i1_55999	Glutathione S-transferase
		DN10694_c0_g1_i2_32852	glutathione S-transferase
		DN10916_c0_g1_i11_14314	glutathione S-transferase
		DN10622_c0_g1_i6_33161	glutathione S-transferase
		DN12351_c0_g2_i1_39712	glutathione S transferase
		DN12274_c0_g3_i2_43534	glutathione S-transferase
		DN11127_c1_g1_i7_24350	Uncharacterised
		DN10916_c0_g1_i9_14313	Uncharacterised
		DN12425_c0_g1_i2_71590	Uncharacterised
		DN12662_c0_g1_i4_71918	glutathione S-transferase
		DN10710_c1_g1_i12_36297	glutathione S-transferase
		DN12662_c0_g1_i2_71916	glutathione S-transferase
		DN11200_c0_g1_i22_23025	glutathione S transferase
		DN10325_c1_g1_i4_3819	Glutathione S-transferase
		DN11298_c0_g3_i2_22778	Uncharacterised
		DN12129_c0_g1_i3_41718	Glutathione S-transferase
		DN12623_c0_g3_i3_72304	glutathione S transferase
		DN12129_c0_g1_i8_41721	glutathione S-transferase
		DN12129_c0_g1_i6_41720	glutathione S-transferase
		DN12300_c0_g1_i16_39700	glutathione S-transferase
		DN10710_c1_g1_i7_36296	glutathione S-transferase
		DN11127_c1_g2_i7_24353	glutathione S-transferase
		DN12623_c0_g3_i15_72317	glutathione S-transferase
		DN12623_c0_g3_i10_72312	glutathione S transferase
		DN10694_c0_g2_i7_32855	glutathione S-transferase
		DN10916_c0_g1_i4_14309	Uncharacterised
		DN11457_c1_g2_i4_56891	Uncharacterised
		DN12129_c0_g1_i1_41716	glutathione S-transferase
		DN12129_c0_g1_i19_41724	Uncharacterised
		DN12623_c0_g3_i11_72314	Uncharacterised
		DN10764_c0_g1_i4_10260	Uncharacterised
		DN12425_c1_g5_i1_71594	Uncharacterised
		DN10694_c0_g2_i4_32853	Glutathione S-transferase
		DN12662_c0_g1_i21_71923	glutathione S-transferase
		DN11740_c0_g1_i6_61455	Uncharacterised
		DN12300_c0_g1_i32_39710	glutathione S-transferase
		DN10710_c1_g1_i18_36299	glutathione S-transferase
		DN12300_c0_g1_i17_39701	Uncharacterised
		DN12275_c2_g1_i3_68705	glutathione S-transferase
		DN11200_c0_g1_i21_23024	glutathione S transferase
		DN11127_c1_g1_i9_24352	Uncharacterised
		DN11740_c0_g2_i4_61454	glutathione S transferase
		DN10325_c1_g1_i10_3826	glutathione S-transferase
		DN11200_c0_g1_i23_23027	Uncharacterised
		DN9831_c0_g2_i1_76383	Uncharacterised
		DN9831_c0_g2_i3_76385	Uncharacterised
		DN12470_c0_g1_i8_71476	glutathione S transferase
		DN10638_c0_g1_i2_32859	glutathione S-transferase
		DN12300_c0_g1_i1_39693	Uncharacterised
		DN12275_c2_g3_i7_68710	Uncharacterised
		DN12351_c0_g2_i2_39713	Uncharacterised
		DN12300_c0_g1_i13_39699	Uncharacterised
		DN10325_c1_g5_i2_3820	glutathione S-transferase
		DN9969_c0_g1_i3_42807	Uncharacterised
		DN5595_c0_g1_i1_60507	Uncharacterised
		DN10638_c0_g1_i6_32864	Uncharacterised
		DN10638_c0_g1_i4_32861	Uncharacterised
		DN10786_c1_g1_i7_10293	Glutathione S-transferase
		DN11802_c0_g1_i3_55996	Uncharacterised
		DN12334_c0_g1_i5_39610	Uncharacterised
		DN12685_c0_g1_i7_72101	glutathione S transferase
		DN12275_c2_g3_i1_68704	Uncharacterised
		DN12300_c0_g1_i28_39707	Uncharacterised
		DN12314_c2_g1_i2_39888	Uncharacterised
		DN12275_c2_g3_i2_68706	Uncharacterised
Schistosoma mansoni thioredoxin glutathione reductase (TGR) (Smp_048430)	4	DN10093_c0_g1_i4_2011	thioredoxin glutathione reductase
		DN6580_c0_g2_i1_15786	thioredoxin glutathione reductase
		DN10491_c0_g1_i3_59313	dihydrolipoamide dehydrogenase
		DN10491_c0_g1_i2_59312	dihydrolipoamide dehydrogenase
Fasciola hepatica TPx (Thioredoxin peroxidase)	2	DN3303_c0_g1_i1_3647	peroxiredoxin 3
		DN10337_c2_g3_i2_29708	Uncharacterised
Schistosoma mansoni Peroxiredoxin (Smp_322080)	2	DN3303_c0_g1_i1_3647	peroxiredoxin 2
		DN10337_c2_g3_i2_29708	Uncharacterised
Fasciola hepatica Peroxiredoxin (A0A2H1CGV5/D915_05992)	2	DN3303_c0_g1_i1_3647	peroxiredoxin 1
		DN10337_c2_g3_i2_29708	Uncharacterised
Fasciola hepatica Peroxiredoxin (A0A2H1C7L1/D915_10207)	2	DN3303_c0_g1_i1_3647	peroxiredoxin 0
		DN10337_c2_g3_i2_29708	Uncharacterised
Schistosoma mansoni Thioredoxin (Smp_054470)	18	DN11064_c0_g2_i2_53099	hypothetical transcript
		DN12253_c1_g2_i7_68485	hypothetical transcript
		DN12253_c1_g2_i1_68480	hypothetical transcript
		DN16298_c0_g1_i1_39003	Uncharacterised
		DN10913_c1_g1_i4_14323	hypothetical transcript
		DN11826_c4_g3_i1_44731	structural maintenance of chromosomes protein 2
		DN6474_c0_g1_i1_18755	structural maintenance of chromosomes protein 2
		DN12253_c1_g2_i4_68482	hypothetical transcript
		DN12958_c0_g1_i1_55474	thioredoxin 1
		DN8728_c0_g1_i3_26235	Thioredoxin
		DN8034_c0_g1_i2_4804	Thioredoxin
		DN11064_c0_g3_i3_53097	Thioredoxin
		DN11064_c0_g1_i5_53100	Thioredoxin
		DN10913_c1_g2_i1_14320	Thioredoxin
		DN10180_c1_g4_i2_35288	Thioredoxin
		DN8728_c0_g1_i5_26236	Thioredoxin
		DN10913_c1_g1_i3_14322	Thioredoxin
		DN12253_c1_g1_i10_68489	Thioredoxin
Schistosoma mansoni VAL6 (Smp_124050)	3	DN5797_c0_g1_i1_52760	Golgi-associated plant pathogenesis-related protein
		DN4751_c0_g1_i2_8068	hypothetical transcript
		DN10072_c0_g1_i1_40924	venom allergen val protein
Ancylostoma caninum, Ancylostoma secreted protein	8	DN11836_c0_g2_i1_69709	Peptidase inhibitor
		DN11047_c0_g2_i1_67118	venom allergen (val) protein
		DN11047_c0_g1_i4_67120	Venom allergen
		DN11047_c0_g1_i3_67119	Venom allergen
		DN4099_c0_g1_i2_36713	Uncharacterised
		DN4099_c0_g1_i1_36712	Uncharacterised
		DN9093_c0_g1_i2_60117	Uncharacterised
		DN5846_c0_g1_i1_10567	Uncharacterised
Necator americanus, Ancylostoma secreted protein	9	DN9093_c0_g1_i2_60117	Uncharacterised
		DN11047_c0_g1_i4_67120	Venom allergen
		DN11047_c0_g1_i3_67119	Venom allergen
		DN4099_c0_g1_i2_36713	Uncharacterised
		DN4099_c0_g1_i1_36712	Uncharacterised
		DN5846_c0_g1_i1_10567	Uncharacterised
		DN11836_c0_g2_i1_69709	Peptidase inhibitor
		DN11047_c0_g2_i1_67118	venom allergen (val) protein
		DN7073_c0_g1_i2_44910	Peptidase inhibitor
Schistosoma mansoni Sm14 (Fatty acid binding protein) (Smp_095360)	3	DN10318_c0_g1_i1_67570	fatty acid binding protein FABP0
		DN1125_c0_g1_i1_57386	Fatty acid-binding protein
		DN9249_c0_g1_i2_7433	fatty acid binding protein FABP2
Fasciola hepatica Fatty acid-binding protein type 3	2	DN10318_c0_g1_i1_67570	fatty acid binding protein FABP1
		DN9249_c0_g1_i2_7433	fatty acid binding protein FABP2
Brugia malayi Asparagine tRNA Synthetase (AsnRS)	7	DN12226_c0_g1_i2_68698	asparaginyl tRNA synthetase cytoplasmic
		DN9945_c0_g1_i1_4316	asparaginyl tRNA synthetase cytoplasmic
		DN10561_c0_g1_i7_29119	asparaginyl tRNA synthetase cytoplasmic
		DN11509_c1_g1_i9_62133	asparaginyl tRNA synthetase cytoplasmic
		DN10561_c0_g1_i5_29118	asparaginyl tRNA synthetase cytoplasmic
		DN11509_c1_g1_i5_62132	asparaginyl tRNA synthetase cytoplasmic
		DN9632_c0_g1_i1_58637	aspartyl tRNA synthetase cytoplasmic
Necator americanus Metalloproteinase	2	DN9257_c0_g1_i1_57880	Family M13 unassigned peptidase (M13 family)
		DN9191_c0_g1_i2_6454	Endothelin-converting enzyme
Schistosoma mansoni SmInAct	1	DN12824_c0_g1_i1_54884	Inhibin beta B chain
Schistosoma mansoni SmATPDase1 (Smp_042020)	1	DN8415_c0_g1_i1_7791	ectonucleoside triphosphate diphosphohydrolase
Schistosoma mansoni Ectonucleotide pyrophosphatase (SmNPP-5) (Smp_153390)	5	DN1832_c0_g1_i1_13035	ectonucleotide pyrophosphatase:phosphodiesterase
	5	DN8881_c0_g1_i1_47537	ectonucleotide pyrophosphatase:phosphodiesterase
	5	DN14098_c0_g1_i1_63192	ectonucleotide pyrophosphatase:phosphodiesterase
	5	DN5273_c0_g1_i1_59766	ectonucleotide pyrophosphatase:phosphodiesterase
	5	DN3258_c0_g1_i1_44766	Uncharacterised
Onchocerca volvulus Alpha-enolase	5	DN14469_c0_g1_i1_24672	enolase
		DN7852_c0_g1_i1_40713	enolase
		DN9213_c0_g1_i1_45970	enolase
		DN13262_c0_g1_i1_2554	enolase B
		DN14116_c0_g1_i1_34224	enolase
Brugia malayi BmK1	2	DN10317_c0_g1_i12_53432	astacin protein
		DN10317_c0_g1_i9_53429	astacin protein
Schistosoma mansoni Serine Protease-2 (SmSP-2)	26	DN11035_c1_g3_i1_42129	Mastin precursor
		DN11087_c0_g1_i2_53046	Mastin precursor
		DN11087_c0_g1_i1_53045	Mastin precursor
		DN12112_c0_g1_i3_66557	subfamily S1A unassigned peptidase (S01 family)
		DN10312_c2_g3_i6_3805	Mastin precursor
		DN10312_c2_g3_i2_3801	Mastin precursor
		DN10610_c6_g1_i8_20266	glycoprotein Antigen 5
		DN9013_c0_g1_i2_47406	glycoprotein Antigen 5
		DN10610_c6_g1_i11_20270	glycoprotein Antigen 5
		DN11419_c0_g1_i2_44968	Chymotrypsinogen A
		DN10312_c2_g3_i7_3806	Mastin precursor
		DN10312_c2_g1_i1_3799	subfamily S1A unassigned peptidase (S01 family)
		DN11087_c0_g4_i1_53049	Mastin precursor
		DN10312_c2_g3_i3_3803	Mastin precursor
		DN10610_c6_g1_i2_20263	glycoprotein Antigen 5
		DN10312_c2_g3_i8_3807	subfamily S1A unassigned peptidase (S01 family)
		DN768_c0_g1_i1_36917	Mastin precursor
		DN10537_c0_g2_i1_3546	Uncharacterised
		DN12112_c0_g1_i2_66556	chymotrypsinogen A
		DN6951_c0_g1_i1_17895	subfamily S1A unassigned peptidase S01 family
		DN8391_c0_g1_i2_47699	subfamily S1A unassigned peptidase S01 family
		DN8391_c0_g1_i1_47698	subfamily S1A unassigned peptidase S01 family
		DN10400_c0_g1_i2_34705	chymotrypsinogen A
		DN10312_c1_g1_i2_3798	subfamily S1A unassigned peptidase (S01 family)
		DN5387_c0_g1_i1_75492	subfamily S1A unassigned peptidase (S01 family)
		DN8531_c0_g1_i3_1871	subfamily S1A unassigned peptidase S01 family
Fasciola hepatica Heat shock protein 90 alpha (Fhep THD20903.1 )	9	DN11960_c0_g1_i1_46290	molecular chaperone HtpG
		DN9350_c0_g1_i2_37241	putative endoplasmin
		DN11414_c0_g1_i1_45013	endoplasmin
		DN11437_c0_g1_i3_56596	heat shock protein 90
		DN11205_c0_g2_i1_23358	heat shock protein 90
		DN10172_c0_g2_i2_35191	heat shock protein
		DN10943_c0_g2_i1_50836	Heat shock protein
		DN11738_c0_g1_i3_48033	heat shock protein 90
		DN5627_c0_g2_i1_9552	heat shock protein 75 kDa mitochondrial
Hymenolepis microstoma Sigma Class Glutathione Transferase like (Hmic CDS25704 )	1	DN5806_c0_g1_i1_22697	AChain A, Glutathione S-transferase 28 Kda
Hymenolepis microstoma Sigma Class Glutathione Transferase like (Hmic CDS28394)	3	DN3993_c0_g1_i1_58938	glutathione S-transferase class-mu 28 kda isozyme
		DN10944_c0_g1_i2_40229	glutathione S-transferase class-mu 28 kda isozyme
		DN8069_c0_g1_i1_4835	Uncharacterised
Schistosoma mansoni Sm16 (SPO-1 and SmSLP) (Smp_341790)	No hits	Nohits	No hits
Schistosoma mansoni Alpha-1/IPSE (Smp_334590)	No hits	Nohits	No hits
Schistosoma mansoni Omega-1 (Smp_334170, Smp_333930, Smp_334240)	No hits	Nohits	No hits
Toxocara canis TES-32	No hits	Nohits	No hits
Toxocara canis TES-70	No hits	Nohits	No hits
Schistosoma mansoni Cystatin B (cysteine protease inhibitor) (Smp_006390)	No hits	Nohits	No hits
Schistosoma mansoni SmKL-1 (Serine-protease inhibitor) (Smp_307450)	No hits	Nohits	No hits
Schistosoma mansoni Sm29 Tegumental Protein (Smp_072190)	No hits	Nohits	No hits
Heligmosomoides polygyrus Alarmin Release Inhibitor (HpARI)	No hits	Nohits	No hits
Opisthorchis viverrini (Ov-GRN-1)	No hits	Nohits	No hits
Fasciola hepatica helminth defense molecule‐1 (FhHDM-1 Fragment)	No hits	Nohits	No hits
Brugia malayi Macrophage Migration Inhibitory Factor (MIF)	No hits	Nohits	No hits
Trichinella spiralis Macrophage Migration Inhibitory Factor (MIF)	No hits	Nohits	No hits
Ancylostoma caninum Neutrophil Inhibitory Factor (AcNIF)	No hits	Nohits	No hits
Brugia malayi TGF-ß homolog-2 (TGH-2)	No hits	Nohits	No hits
Heligmosomoides polygyrus TGF-ß mimic (TGM)	No hits	Nohits	No hits
Acanthocheilonema viteae ES-62	No hits	Nohits	No hits
Fasciola hepatica Fatty acid binding protein Fh15	No hits	Nohits	No hits
Fasciola hepatica Mucin-like polypeptide Fhmuc	No hits	Nohits	No hits
Brugia malayi Abundant larval transcript-2 protein (alt-2)	No hits	Nohits	No hits
Ancylostoma caninum AcK1 (Inhibitor of potassium channel) (ANCCAN_23812)	No hits	Nohits	No hits
Necator americanus Anti-inflammatory protein-1 (W2TPY4)	No hits	Nohits	No hits
Necator americanus Anti-inflammatory protein-2 (W2SWZ9)	No hits	Nohits	No hits
Acanthocheilonema viteae Cystatin	No hits	Nohits	No hits
Brugia malayi Cystatin (CPI2_BRUMA)	No hits	Nohits	No hits
Onchocerca volvulus Cystatin (CYTX_ONCVO)	No hits	Nohits	No hits
Clonorchis sinensis Cystatin	No hits	Nohits	No hits
Schistosoma japonicum Cystatin	No hits	Nohits	No hits
Schistosoma mansoni SmKI-1 Kunitz-type serine protease inhibitor (Smp_307450)	No hits	Nohits	No hits
Ancylostoma ceylanicum Tissue Inhibitor of Metalloprotease Ace-MTP-2	No hits	Nohits	No hits
