# Supplementary material for: Evidence of Immune Modulators in the Secretome of the Equine Tapeworm Anoplocephala perfoliata
Source: Pathogens. 2021 Jul 20;10(7):912. doi: 10.3390/pathogens10070912 (PMC8308605; doi:10.3390/pathogens10070912)
Supplement: Supplementary file 1 [file pathogens-10-00912-s001.zip › Supplementary Table S2-S4. The full list of proteins identified in A. perfoliata secretome proteomics dataset.xlsx]

## Sheet: Table S2. EV proteomic dataset
Supplementary Table S2. The full list of proteins identified in A. perfoliata whole extracellular vesicles (EVs) proteomic dataset (Protein hits shaded in grey and in bold represent known helminth released immune modulators, as also identified in the A. perfoliata transcriptome).
Sample set	Immunomodulators	Accession	Score	Mass	Mean Number Reads	Num. of matches	Num. of significant matches	Num. of sequences	Num. of significant sequences	emPAI	Frame	Description	Column1	Tags	Length	#Hits	e-Value	sim mean	#GO	GO IDs	GO Names	Enzyme Codes	Enzyme Names	InterPro IDs	InterPro GO IDs	InterPro GO Names
EV		DN11838_c0_g1_i2_56054	1933	412370	78	99	63	80	50	0.55		WD repeat and FYVE domain-containing protein 3	TRUE	[INTERPRO, BLASTED, MAPPED, ANNOTATED]	665	20	0	72.52	1	F:GO:0046872	F:metal ion binding			IPR013083 (G3DSA:3.30.40.GENE3D); IPR036372 (G3DSA:1.10.1540.GENE3D); IPR001680 (PFAM); IPR000409 (PFAM); IPR000306 (PFAM); IPR015943 (G3DSA:2.130.10.GENE3D); PTHR46108 (PANTHER); IPR019775 (PROSITE_PATTERNS); IPR001680 (PROSITE_PROFILES); IPR000409 (PROSITE_PROFILES); IPR017986 (PROSITE_PROFILES); IPR017455 (PROSITE_PROFILES); IPR011011 (SUPERFAMILY); IPR036372 (SUPERFAMILY); IPR036322 (SUPERFAM…	F:GO:0005515; F:GO:0046872	F:protein binding; F:metal ion binding
EV		DN10334_c0_g1_i3_17117	958	106374	41	55	29	23	16	1.01		actin, cytoplasmic type 5	TRUE	[INTERPRO, BLASTED, MAPPED, ANNOTATED]	376	20	0	99.35	15	P:GO:0000281; P:GO:0007409; P:GO:0048870; P:GO:0098974; F:GO:0005524; F:GO:0019901; F:GO:0098973; C:GO:0005884; C:GO:0005886; C:GO:0005925; C:GO:0030424; C:GO:0035060; C:GO:0035267; C:GO:0045202; C:GO:0097433	P:mitotic cytokinesis; P:axonogenesis; P:cell motility; P:postsynaptic actin cytoskeleton organization; F:ATP binding; F:protein kinase binding; F:structural constituent of postsynaptic actin cytoskeleton; C:actin filament; C:plasma membrane; C:focal adhesion; C:axon; C:brahma complex; C:NuA4 histone acetyltransferase complex; C:synapse; C:dense body			IPR004000 (PRINTS); G3DSA:3.30.420.40 (GENE3D); G3DSA:3.30.420.40 (GENE3D); IPR004000 (PFAM); G3DSA:3.90.640.10 (GENE3D); PTHR11937:SF192 (PANTHER); IPR004000 (PANTHER); IPR004001 (PROSITE_PATTERNS); IPR020902 (PROSITE_PATTERNS); IPR004001 (PROSITE_PATTERNS); cd00012 (CDD); IPR043129 (SUPERFAMILY); IPR043129 (SUPERFAMILY)	no GO terms	no GO terms
EV		DN10026_c0_g1_i2_27828	346	259539	35.6667	46	16	38	15	0.21		myosin XV	TRUE	[INTERPRO, BLASTED, MAPPED, ANNOTATED]	2186	20	0	80.26	5	P:GO:0007605; F:GO:0003774; F:GO:0003779; F:GO:0005524; C:GO:0016459	P:sensory perception of sound; F:motor activity; F:actin binding; F:ATP binding; C:myosin complex	EC:3.6.1.15	Nucleoside-triphosphate phosphatase	Coil (COILS); IPR001609 (PRINTS); G3DSA:1.20.120.720 (GENE3D); IPR036961 (G3DSA:3.40.850.GENE3D); IPR000048 (PFAM); IPR000857 (PFAM); IPR001609 (PFAM); G3DSA:1.20.58.530 (GENE3D); IPR038185 (G3DSA:1.25.40.GENE3D); G3DSA:3.30.70.3240 (GENE3D); G3DSA:1.20.5.190 (GENE3D); G3DSA:1.10.10.820 (GENE3D); mobidb-lite (MOBIDB_LITE); mobidb-lite (MOBIDB_LITE); mobidb-lite (MOBIDB_LITE); mobidb-lite (MOBIDB_…	F:GO:0003774; F:GO:0005515; F:GO:0005524; C:GO:0005856; C:GO:0016459	F:motor activity; F:protein binding; F:ATP binding; C:cytoskeleton; C:myosin complex
EV		DN10438_c0_g2_i2_34624	1235	253066	34	80	54	65	44	0.97		putative myosin-10 (Myosin heavy chain, nonmuscle IIb) (Nonmuscle myosin heavy chain IIb) (NMMHC II-b) (NMMHC-IIB) (Cellular myosin heavy chain, type B) (Nonmuscle myosin heavy chain-B) (NMMHC-B)	TRUE	[INTERPRO, BLASTED, MAPPED, ANNOTATED]	1999	20	0	82.97	5	F:GO:0003774; F:GO:0005524; F:GO:0051015; C:GO:0016021; C:GO:0016459	F:motor activity; F:ATP binding; F:actin filament binding; C:integral component of membrane; C:myosin complex	EC:3.6.1.15	Nucleoside-triphosphate phosphatase	Coil (COILS); Coil (COILS); Coil (COILS); Coil (COILS); Coil (COILS); Coil (COILS); Coil (COILS); Coil (COILS); Coil (COILS); Coil (COILS); Coil (COILS); IPR001609 (PRINTS); G3DSA:1.20.58.530 (GENE3D); IPR027401 (G3DSA:4.10.270.GENE3D); IPR002928 (PFAM); IPR001609 (PFAM); G3DSA:3.30.70.3240 (GENE3D); IPR036961 (G3DSA:3.40.850.GENE3D); IPR004009 (PFAM); IPR008989 (G3DSA:2.30.30.GENE3D); G3DSA:1.20…	F:GO:0003774; F:GO:0005515; F:GO:0005524; F:GO:0051015; C:GO:0016459	F:motor activity; F:protein binding; F:ATP binding; F:actin filament binding; C:myosin complex
EV		DN11834_c0_g1_i11_56034	611	107855	30.3333	40	22	36	21	0.93		Leucine-rich repeat-containing protein	TRUE	[INTERPRO, BLASTED, MAPPED]	879	17	0	57.12	2	F:GO:0000166; F:GO:0005524	F:nucleotide binding; F:ATP binding			IPR032675 (G3DSA:3.80.10.GENE3D); mobidb-lite (MOBIDB_LITE); SSF52047 (SUPERFAMILY)	no GO terms	no GO terms
EV		DN10250_c0_g1_i1_26991	245	257051	29	33	14	30	13	0.19		otoferlin	TRUE	[INTERPRO, BLASTED, MAPPED, ANNOTATED]	2180	20	0	82.76	1	C:GO:0016021	C:integral component of membrane			Coil (COILS); Coil (COILS); IPR012561 (PFAM); IPR035892 (G3DSA:2.60.40.GENE3D); IPR035892 (G3DSA:2.60.40.GENE3D); IPR032362 (PFAM); IPR000008 (PFAM); IPR035892 (G3DSA:2.60.40.GENE3D); IPR035892 (G3DSA:2.60.40.GENE3D); IPR035892 (G3DSA:2.60.40.GENE3D); IPR035892 (G3DSA:2.60.40.GENE3D); mobidb-lite (MOBIDB_LITE); mobidb-lite (MOBIDB_LITE); IPR037721 (PANTHER); IPR000008 (PROSITE_PROFILES); IPR00000…	C:GO:0016021	C:integral component of membrane
EV		DN10161_c0_g1_i1_59685	599	82878	28.6667	30	17	22	12	0.79		fascin 2	TRUE	[INTERPRO, BLASTED, MAPPED, ANNOTATED]	640	20	0	64.77	4	P:GO:0007015; P:GO:0016477; F:GO:0030674; F:GO:0051015	P:actin filament organization; P:cell migration; F:protein-macromolecule adaptor activity; F:actin filament binding			IPR022768 (PFAM); G3DSA:2.80.10.50 (GENE3D); G3DSA:2.80.10.50 (GENE3D); mobidb-lite (MOBIDB_LITE); IPR030146 (PTHR10551:PANTHER); IPR010431 (PANTHER); IPR030146 (PTHR10551:PANTHER); IPR010431 (PANTHER); IPR008999 (SUPERFAMILY); IPR008999 (SUPERFAMILY); IPR008999 (SUPERFAMILY)	P:GO:0007015; P:GO:0016477; P:GO:0030036; F:GO:0030674; F:GO:0051015	P:actin filament organization; P:cell migration; P:actin cytoskeleton organization; F:protein-macromolecule adaptor activity; F:actin filament binding
EV	Immunomodulators	DN9786_c0_g1_i1_72692	1113	114026	27	37	28	28	22	1.21	6	calpain A	TRUE	[INTERPRO, BLASTED, MAPPED, ANNOTATED]	871	20	0	77.64	4	P:GO:0006508; F:GO:0004198; F:GO:0005509; C:GO:0016021	P:proteolysis; F:calcium-dependent cysteine-type endopeptidase activity; F:calcium ion binding; C:integral component of membrane	EC:3.4.22; EC:3.4.22.1; EC:3.4.99; EC:3.4.22.41; EC:3.4.22.40; EC:3.4.22.34; EC:3.4.22.8; EC:3.4.22.28; EC:3.4.22.16; EC:3.4.22.27; EC:3.4.22.38; EC:3.4.22.15; EC:3.4.22.14	Acting on peptide bonds (peptidases); Cathepsin B; Acting on peptide bonds (peptidases); Cathepsin F; Bleomycin hydrolase; Legumain; Clostripain; Picornain 3C; Cathepsin H; Cathepsin S; Cathepsin K; Cathepsin L; Actinidain	IPR022684 (PRINTS); IPR001300 (PFAM); IPR002048 (PFAM); IPR022682 (PFAM); G3DSA:2.60.120.380 (GENE3D); G3DSA:3.90.70.10 (GENE3D); mobidb-lite (MOBIDB_LITE); PTHR10183 (PANTHER); PTHR10183:SF396 (PANTHER); IPR018247 (PROSITE_PATTERNS); IPR000169 (PROSITE_PATTERNS); IPR002048 (PROSITE_PROFILES); IPR001300 (PROSITE_PROFILES); IPR002048 (PROSITE_PROFILES); IPR002048 (PROSITE_PROFILES); IPR033883 (CDD…	P:GO:0006508; F:GO:0004198; F:GO:0005509	P:proteolysis; F:calcium-dependent cysteine-type endopeptidase activity; F:calcium ion binding
EV		DN8700_c0_g1_i1_600	747	46591	26.3333	50	32	26	18	4.53		Annexin A7	TRUE	[INTERPRO, BLASTED, MAPPED, ANNOTATED]	324	20	0	78.68	2	F:GO:0005509; F:GO:0005544	F:calcium ion binding; F:calcium-dependent phospholipid binding			IPR001464 (PRINTS); IPR037104 (G3DSA:1.10.220.GENE3D); IPR037104 (G3DSA:1.10.220.GENE3D); IPR037104 (G3DSA:1.10.220.GENE3D); IPR018502 (PFAM); IPR037104 (G3DSA:1.10.220.GENE3D); PTHR10502:SF226 (PANTHER); PTHR10502 (PANTHER); IPR018502 (PROSITE_PROFILES); IPR018502 (PROSITE_PROFILES); IPR018502 (PROSITE_PROFILES); IPR018502 (PROSITE_PROFILES); IPR037104 (SUPERFAMILY)	F:GO:0005509; F:GO:0005544	F:calcium ion binding; F:calcium-dependent phospholipid binding
EV		DN11364_c0_g2_i1_39228	691	80810	25	34	30	23	22	2.05	2	phosphoenolpyruvate carboxykinase	TRUE	[INTERPRO, BLASTED, MAPPED, ANNOTATED]	626	20	0	89.31	5	P:GO:0006094; P:GO:0016310; F:GO:0004613; F:GO:0005525; F:GO:0016301	P:gluconeogenesis; P:phosphorylation; F:phosphoenolpyruvate carboxykinase (GTP) activity; F:GTP binding; F:kinase activity	EC:4.1.1.32	Phosphoenolpyruvate carboxykinase (GTP)	IPR013035 (G3DSA:3.90.228.GENE3D); IPR008209 (PIRSF); IPR035077 (PFAM); IPR035078 (PFAM); G3DSA:2.170.8.10 (GENE3D); IPR008210 (G3DSA:3.40.449.GENE3D); PTHR11561:SF0 (PANTHER); IPR008209 (PANTHER); IPR018091 (PROSITE_PATTERNS); IPR008209 (HAMAP); IPR008209 (CDD); SSF53795 (SUPERFAMILY); IPR008210 (SUPERFAMILY)	P:GO:0006094; F:GO:0004611; F:GO:0004613; F:GO:0005525; F:GO:0017076	P:gluconeogenesis; F:phosphoenolpyruvate carboxykinase activity; F:phosphoenolpyruvate carboxykinase (GTP) activity; F:GTP binding; F:purine nucleotide binding
EV		DN10334_c0_g1_i1_17115	865	108822	23.6667	40	25	21	15	0.76		actin, cytoplasmic type 5	TRUE	[INTERPRO, BLASTED, MAPPED, ANNOTATED]	376	20	0	99.35	15	P:GO:0000281; P:GO:0007409; P:GO:0048870; P:GO:0098974; F:GO:0005524; F:GO:0019901; F:GO:0098973; C:GO:0005884; C:GO:0005886; C:GO:0005925; C:GO:0030424; C:GO:0035060; C:GO:0035267; C:GO:0045202; C:GO:0097433	P:mitotic cytokinesis; P:axonogenesis; P:cell motility; P:postsynaptic actin cytoskeleton organization; F:ATP binding; F:protein kinase binding; F:structural constituent of postsynaptic actin cytoskeleton; C:actin filament; C:plasma membrane; C:focal adhesion; C:axon; C:brahma complex; C:NuA4 histone acetyltransferase complex; C:synapse; C:dense body			IPR004000 (PRINTS); G3DSA:3.30.420.40 (GENE3D); G3DSA:3.30.420.40 (GENE3D); IPR004000 (PFAM); G3DSA:3.90.640.10 (GENE3D); PTHR11937:SF192 (PANTHER); IPR004000 (PANTHER); IPR004001 (PROSITE_PATTERNS); IPR020902 (PROSITE_PATTERNS); IPR004001 (PROSITE_PATTERNS); cd00012 (CDD); IPR043129 (SUPERFAMILY); IPR043129 (SUPERFAMILY)	no GO terms	no GO terms
EV		DN12581_c0_g1_i2_73130	440	79699	23.3333	23	14	19	12	0.76		Heat shock 70 kDa protein 4	TRUE	[INTERPRO, BLASTED, MAPPED, ANNOTATED]	647	20	0	95.29	3	P:GO:0006457; F:GO:0005524; F:GO:0051082	P:protein folding; F:ATP binding; F:unfolded protein binding			Coil (COILS); PR00301 (PRINTS); G3DSA:3.90.640.10 (GENE3D); IPR029048 (G3DSA:1.20.1270.GENE3D); G3DSA:3.30.30.30 (GENE3D); IPR013126 (PFAM); G3DSA:3.30.420.40 (GENE3D); IPR029047 (G3DSA:2.60.34.GENE3D); G3DSA:3.30.420.40 (GENE3D); mobidb-lite (MOBIDB_LITE); IPR013126 (PANTHER); PTHR19375:SF210 (PANTHER); IPR018181 (PROSITE_PATTERNS); IPR018181 (PROSITE_PATTERNS); IPR018181 (PROSITE_PATTERNS); cd1…	no GO terms	no GO terms
EV		DN11921_c1_g2_i1_46303	400	80410	22.3333	25	16	20	14	0.82		expressed conserved protein	TRUE	[INTERPRO, BLASTED]	534	16	4.87192e-115	46.82						Coil (COILS); mobidb-lite (MOBIDB_LITE); mobidb-lite (MOBIDB_LITE); mobidb-lite (MOBIDB_LITE)	no GO terms	no GO terms
EV		DN11931_c2_g1_i10_58523	396	83328	22.3333	23	16	22	16	0.85	6	von Willebrand factor A domain containing protein	TRUE	[INTERPRO, BLASTED, MAPPED]	749	20	0	73.89	2	P:GO:0000724; P:GO:0006281	P:double-strand break repair via homologous recombination; P:DNA repair			IPR002035 (PFAM); IPR013694 (PFAM); IPR036465 (G3DSA:3.40.50.GENE3D); PTHR45737 (PANTHER); PTHR45737:SF6 (PANTHER); IPR013694 (PROSITE_PROFILES); IPR002035 (PROSITE_PROFILES); IPR036465 (SUPERFAMILY)	no GO terms	no GO terms
EV		DN7822_c0_g2_i1_27391	131	355542	21.6667	26	5	24	5	0.05		expressed conserved protein	TRUE	[INTERPRO, BLASTED, MAPPED, ANNOTATED]	3027	20	0	58.28	3	P:GO:0045104; F:GO:0008092; C:GO:0005856	P:intermediate filament cytoskeleton organization; F:cytoskeletal protein binding; C:cytoskeleton			Coil (COILS); Coil (COILS); Coil (COILS); IPR041615 (PFAM); G3DSA:1.20.58.60 (GENE3D); G3DSA:2.30.30.40 (GENE3D); mobidb-lite (MOBIDB_LITE); mobidb-lite (MOBIDB_LITE); mobidb-lite (MOBIDB_LITE); mobidb-lite (MOBIDB_LITE); mobidb-lite (MOBIDB_LITE); mobidb-lite (MOBIDB_LITE); mobidb-lite (MOBIDB_LITE); mobidb-lite (MOBIDB_LITE); IPR043197 (PANTHER); PTHR23169:SF23 (PANTHER)	P:GO:0045104	P:intermediate filament cytoskeleton organization
EV		DN7793_c0_g1_i1_23754	321	41122	21.3333	23	13	18	9	1.53		Annexin A7	TRUE	[INTERPRO, BLASTED, MAPPED, ANNOTATED]	334	20	3.32411e-180	77.98	2	F:GO:0005509; F:GO:0005544	F:calcium ion binding; F:calcium-dependent phospholipid binding			IPR001464 (PRINTS); IPR037104 (G3DSA:1.10.220.GENE3D); IPR018502 (PFAM); IPR037104 (G3DSA:1.10.220.GENE3D); IPR037104 (G3DSA:1.10.220.GENE3D); IPR037104 (G3DSA:1.10.220.GENE3D); PTHR10502 (PANTHER); PTHR10502:SF226 (PANTHER); IPR018502 (PROSITE_PROFILES); IPR018502 (PROSITE_PROFILES); IPR018502 (PROSITE_PROFILES); IPR018502 (PROSITE_PROFILES); IPR037104 (SUPERFAMILY)	F:GO:0005509; F:GO:0005544	F:calcium ion binding; F:calcium-dependent phospholipid binding
EV		DN11165_c0_g1_i1_24177	416	42395	21	25	17	19	14	2.58		aldo keto reductase family 1 member B4	TRUE	[INTERPRO, BLASTED, MAPPED, ANNOTATED]	316	20	7.19063e-172	79.25	3	P:GO:0055114; F:GO:0016491; C:GO:0016021	P:oxidation-reduction process; F:oxidoreductase activity; C:integral component of membrane			IPR020471 (PRINTS); IPR036812 (G3DSA:3.20.20.GENE3D); IPR020471 (PIRSF); IPR023210 (PFAM); PTHR11732:SF482 (PANTHER); IPR020471 (PANTHER); IPR018170 (PROSITE_PATTERNS); IPR018170 (PROSITE_PATTERNS); IPR023210 (CDD); IPR036812 (SUPERFAMILY)	P:GO:0055114; F:GO:0016491	P:oxidation-reduction process; F:oxidoreductase activity
EV		DN10367_c0_g1_i3_29401	473	55896	20.6667	17	12	12	10	0.99	3	expressed conserved protein	TRUE	[INTERPRO, BLASTED]	418	8	1.18536e-33	61.91						IPR043792 (PFAM); mobidb-lite (MOBIDB_LITE); mobidb-lite (MOBIDB_LITE); mobidb-lite (MOBIDB_LITE); mobidb-lite (MOBIDB_LITE); mobidb-lite (MOBIDB_LITE); mobidb-lite (MOBIDB_LITE); mobidb-lite (MOBIDB_LITE); mobidb-lite (MOBIDB_LITE)	no GO terms	no GO terms
EV		DN12278_c0_g6_i1_68615	642	83102	20.3333	31	21	16	11	0.93		solute carrier family 5	TRUE	[INTERPRO, BLASTED, MAPPED, ANNOTATED]	693	20	0	78.96	3	P:GO:0055085; F:GO:0022857; C:GO:0016021	P:transmembrane transport; F:transmembrane transporter activity; C:integral component of membrane			Coil (COILS); IPR001734 (PFAM); IPR001734 (TIGRFAM); IPR038377 (G3DSA:1.20.1730.GENE3D); PTHR11819 (PANTHER); IPR001734 (PROSITE_PROFILES)	P:GO:0055085; F:GO:0022857; C:GO:0016020	P:transmembrane transport; F:transmembrane transporter activity; C:membrane
EV		DN5781_c0_g1_i1_2927	674	27485	20	26	19	16	10	3.42	5	tegumental antigen	TRUE	[INTERPRO, BLASTED, MAPPED, ANNOTATED]	194	20	1.11707e-95	72.23	3	P:GO:0007017; F:GO:0005509; C:GO:0030286	P:microtubule-based process; F:calcium ion binding; C:dynein complex			IPR001372 (PFAM); IPR037177 (G3DSA:3.30.740.GENE3D); IPR037177 (SUPERFAMILY)	P:GO:0007017; C:GO:0030286	P:microtubule-based process; C:dynein complex
EV		DN10491_c0_g3_i2_21343	303	102565	19	29	15	21	13	0.6		Programmed cell death 6-interacting protein	TRUE	[INTERPRO, BLASTED]	839	20	0	72.21						Coil (COILS); IPR025304 (PFAM); IPR004328 (PFAM); IPR038499 (G3DSA:1.25.40.GENE3D); G3DSA:1.20.140.50 (GENE3D); G3DSA:1.20.120.560 (GENE3D); mobidb-lite (MOBIDB_LITE); mobidb-lite (MOBIDB_LITE); mobidb-lite (MOBIDB_LITE); mobidb-lite (MOBIDB_LITE); mobidb-lite (MOBIDB_LITE); PTHR23030 (PANTHER); IPR004328 (PROSITE_PROFILES)	F:GO:0005515	F:protein binding
EV		DN10163_c0_g1_i1_35077	419	164151	18.3333	37	18	28	13	0.43		peroxidasin	TRUE	[INTERPRO, BLASTED, MAPPED, ANNOTATED]	1347	20	0	77.54	5	P:GO:0006979; P:GO:0055114; P:GO:0098869; F:GO:0004601; F:GO:0020037	P:response to oxidative stress; P:oxidation-reduction process; P:cellular oxidant detoxification; F:peroxidase activity; F:heme binding	EC:1.11.1.7	Peroxidase	IPR019791 (PRINTS); IPR019791 (PFAM); IPR013783 (G3DSA:2.60.40.GENE3D); PF13927 (PFAM); IPR001611 (PFAM); IPR013783 (G3DSA:2.60.40.GENE3D); IPR037120 (G3DSA:1.10.640.GENE3D); IPR032675 (G3DSA:3.80.10.GENE3D); IPR013098 (PFAM); PTHR11475 (PANTHER); PTHR11475 (PANTHER); PTHR11475:SF58 (PANTHER); PTHR11475:SF58 (PANTHER); PTHR11475:SF58 (PANTHER); PTHR11475 (PANTHER); IPR019791 (PROSITE_PROFILES); I…	P:GO:0006979; P:GO:0055114; F:GO:0004601; F:GO:0005515; F:GO:0020037	P:response to oxidative stress; P:oxidation-reduction process; F:peroxidase activity; F:protein binding; F:heme binding
EV	Immunomodulators	DN14469_c0_g1_i1_24672	447	56481	18.3333	19	12	18	12	0.97		enolase	TRUE	[INTERPRO, BLASTED, MAPPED, ANNOTATED]	433	20	0	93.4	8	P:GO:0006096; P:GO:0006122; P:GO:0006367; F:GO:0000287; F:GO:0004634; F:GO:0016787; C:GO:0000015; C:GO:0005750	P:glycolytic process; P:mitochondrial electron transport, ubiquinol to cytochrome c; P:transcription initiation from RNA polymerase II promoter; F:magnesium ion binding; F:phosphopyruvate hydratase activity; F:hydrolase activity; C:phosphopyruvate hydratase complex; C:mitochondrial respiratory chain complex III	EC:4.2.1.11	Phosphopyruvate hydratase	IPR000941 (PRINTS); IPR000941 (TIGRFAM); IPR000941 (PIRSF); IPR029017 (G3DSA:3.30.390.GENE3D); IPR036849 (G3DSA:3.20.20.GENE3D); IPR020811 (PFAM); IPR020810 (PFAM); IPR000941 (PANTHER); IPR020809 (PROSITE_PATTERNS); IPR000941 (HAMAP); IPR000941 (CDD); IPR036849 (SUPERFAMILY); IPR029017 (SUPERFAMILY)	P:GO:0006096; F:GO:0000287; F:GO:0004634; C:GO:0000015	P:glycolytic process; F:magnesium ion binding; F:phosphopyruvate hydratase activity; C:phosphopyruvate hydratase complex
EV		DN12547_c0_g1_i1_46361	335	19339	17.6667	29	16	8	4	1.62		ubiquitin-60S ribosomal protein L40	TRUE	[INTERPRO, BLASTED, MAPPED, ANNOTATED]	129	20	2.25642e-89	97.57	3	P:GO:0006412; F:GO:0003735; C:GO:0005840	P:translation; F:structural constituent of ribosome; C:ribosome			IPR019956 (PRINTS); IPR038587 (G3DSA:2.20.28.GENE3D); G3DSA:3.10.20.90 (GENE3D); IPR000626 (PFAM); IPR001975 (PFAM); PTHR10666 (PANTHER); PTHR10666:SF368 (PANTHER); IPR019954 (PROSITE_PATTERNS); IPR000626 (PROSITE_PROFILES); cd01803 (CDD); IPR029071 (SUPERFAMILY)	P:GO:0006412; F:GO:0003735; F:GO:0005515; C:GO:0005840	P:translation; F:structural constituent of ribosome; F:protein binding; C:ribosome
EV		DN9930_c0_g1_i1_67885	1023	46070	17.3333	35	27	21	17	3.91	5	Annexin A13 (Annexin XIII)	TRUE	[INTERPRO, BLASTED, MAPPED, ANNOTATED]	366	20	0	74.54	2	F:GO:0005509; F:GO:0005544	F:calcium ion binding; F:calcium-dependent phospholipid binding			IPR001464 (PRINTS); IPR018502 (PFAM); IPR037104 (G3DSA:1.10.220.GENE3D); IPR037104 (G3DSA:1.10.220.GENE3D); IPR037104 (G3DSA:1.10.220.GENE3D); IPR037104 (G3DSA:1.10.220.GENE3D); PTHR10502 (PANTHER); PTHR10502:SF226 (PANTHER); IPR018252 (PROSITE_PATTERNS); IPR018502 (PROSITE_PROFILES); IPR018502 (PROSITE_PROFILES); IPR018502 (PROSITE_PROFILES); IPR018502 (PROSITE_PROFILES); IPR037104 (SUPERFAMILY)	F:GO:0005509; F:GO:0005544	F:calcium ion binding; F:calcium-dependent phospholipid binding
EV		DN15763_c0_g1_i1_57495	260	30820	17	16	10	10	6	1.05		tegumental protein	TRUE	[INTERPRO, BLASTED, MAPPED, ANNOTATED]	169	20	1.00633e-100	81.53	2	P:GO:0007017; C:GO:0030286	P:microtubule-based process; C:dynein complex			Coil (COILS); IPR037177 (G3DSA:3.30.740.GENE3D); IPR001372 (PFAM); IPR037177 (SUPERFAMILY)	P:GO:0007017; C:GO:0030286	P:microtubule-based process; C:dynein complex
EV	Immunomodulators	DN11960_c0_g1_i1_46290	239	91406	16	20	10	19	9	0.42		molecular chaperone HtpG/HSP90alpha	TRUE	[INTERPRO, BLASTED, MAPPED, ANNOTATED]	743	20	0	90.05	3	P:GO:0006457; F:GO:0005524; F:GO:0051082	P:protein folding; F:ATP binding; F:unfolded protein binding			IPR020575 (PRINTS); IPR037196 (G3DSA:1.20.120.GENE3D); IPR001404 (PIRSF); G3DSA:3.40.50.11260 (GENE3D); IPR003594 (PFAM); G3DSA:3.30.70.2140 (GENE3D); IPR001404 (PFAM); G3DSA:3.30.230.80 (GENE3D); IPR036890 (G3DSA:3.30.565.GENE3D); mobidb-lite (MOBIDB_LITE); mobidb-lite (MOBIDB_LITE); mobidb-lite (MOBIDB_LITE); PTHR11528:SF79 (PANTHER); IPR001404 (PANTHER); IPR019805 (PROSITE_PATTERNS); IPR001404…	P:GO:0006457; F:GO:0005524; F:GO:0051082	P:protein folding; F:ATP binding; F:unfolded protein binding
EV		DN8957_c0_g1_i1_66134	299	53507	16	19	11	16	11	0.93		expressed conserved protein	TRUE	[INTERPRO, BLASTED]	407	15	8.87154e-75	55.45						mobidb-lite (MOBIDB_LITE); mobidb-lite (MOBIDB_LITE); mobidb-lite (MOBIDB_LITE); mobidb-lite (MOBIDB_LITE); mobidb-lite (MOBIDB_LITE); mobidb-lite (MOBIDB_LITE); mobidb-lite (MOBIDB_LITE)	no GO terms	no GO terms
EV	Immunomodulators	DN9013_c0_g1_i2_47406	476	61092	15.6667	26	15	17	12	1.2	3	glycoprotein Antigen 5	TRUE	[INTERPRO, BLASTED, MAPPED, ANNOTATED]	483	20	0	68.67	2	P:GO:0006508; F:GO:0004252	P:proteolysis; F:serine-type endopeptidase activity	EC:3.4.21.73; EC:3.4.24.7; EC:3.4.21.71; EC:3.4.24.3; EC:3.4.21.34; EC:3.4.21.78; EC:3.4.21.75; EC:3.4.21.26; EC:3.4.21.27; EC:3.4.21.68; EC:3.4.21.69; EC:3.4.24.34; EC:3.4.21.41; EC:3.4.21.83; EC:3.4.21.88; EC:3.4.21.45; EC:3.4.21.89; EC:3.4.21.42; EC:3.4.19.1; EC:3.4.21.43; EC:3.4.21.87; EC:3.4.21.38; EC:3.4.21.35; EC:3.4.21.79; EC:3.4.21.36; EC:3.4.21.102; EC:3.4.21.39; EC:3.4.21; EC:3.4.21.4;…	U-plasminogen activator; Interstitial collagenase; Pancreatic elastase II; Microbial collagenase; Plasma kallikrein; Granzyme A; Furin; Prolyl oligopeptidase; Coagulation factor XIa; T-plasminogen activator; Protein C (activated); Neutrophil collagenase; Complement subcomponent C1r; Oligopeptidase B; Repressor LexA; Complement factor I; Signal peptidase I; Complement subcomponent C1s; Acylaminoac…	Coil (COILS); IPR001314 (PRINTS); IPR043504 (G3DSA:2.40.10.GENE3D); IPR001254 (PFAM); IPR043504 (G3DSA:2.40.10.GENE3D); IPR043504 (G3DSA:2.40.10.GENE3D); mobidb-lite (MOBIDB_LITE); PTHR24260 (PANTHER); IPR018114 (PROSITE_PATTERNS); IPR001254 (PROSITE_PROFILES); IPR001254 (CDD); IPR009003 (SUPERFAMILY)	P:GO:0006508; F:GO:0004252	P:proteolysis; F:serine-type endopeptidase activity
EV		DN12676_c0_g1_i9_72045	480	48120	15.3333	25	16	15	12	1.53	5	Annexin A13 (Annexin XIII)	TRUE	[INTERPRO, BLASTED, MAPPED, ANNOTATED]	349	20	0	75.56	3	F:GO:0005509; F:GO:0005544; F:GO:0016817	F:calcium ion binding; F:calcium-dependent phospholipid binding; F:hydrolase activity, acting on acid anhydrides			IPR001464 (PRINTS); IPR037104 (G3DSA:1.10.220.GENE3D); IPR037104 (G3DSA:1.10.220.GENE3D); IPR018502 (PFAM); IPR037104 (G3DSA:1.10.220.GENE3D); IPR037104 (G3DSA:1.10.220.GENE3D); PTHR10502 (PANTHER); IPR018502 (PROSITE_PROFILES); IPR018502 (PROSITE_PROFILES); IPR018502 (PROSITE_PROFILES); IPR037104 (SUPERFAMILY)	F:GO:0005509; F:GO:0005544	F:calcium ion binding; F:calcium-dependent phospholipid binding
EV		DN12789_c0_g1_i5_70580	293	220523	15	23	10	22	9	0.14		alpha 2 macroglobulin	TRUE	[INTERPRO, BLASTED, MAPPED, ANNOTATED]	1910	20	0	60.11	1	C:GO:0005576	C:extracellular region			G3DSA:2.20.130.20 (GENE3D); G3DSA:2.10.25.140 (GENE3D); IPR036595 (G3DSA:2.60.40.GENE3D); IPR011626 (PFAM); IPR041555 (PFAM); G3DSA:1.50.10.20 (GENE3D); G3DSA:2.60.40.1940 (GENE3D); IPR001599 (PFAM); G3DSA:2.60.120.1540 (GENE3D); IPR013783 (G3DSA:2.60.40.GENE3D); IPR001774 (PFAM); IPR009048 (PFAM); G3DSA:2.10.25.10 (GENE3D); mobidb-lite (MOBIDB_LITE); mobidb-lite (MOBIDB_LITE); PTHR11412 (PANTHER…	P:GO:0007154; F:GO:0004866; C:GO:0005576; C:GO:0005615; C:GO:0016020	P:cell communication; F:endopeptidase inhibitor activity; C:extracellular region; C:extracellular space; C:membrane
EV		DN11218_c0_g1_i1_75075	338	52918	14.3333	19	14	14	10	1.19		Phosphoglycerate kinase	TRUE	[INTERPRO, BLASTED, MAPPED, ANNOTATED]	415	20	0	88.65	7	P:GO:0006094; P:GO:0006096; P:GO:1903862; F:GO:0004618; F:GO:0005524; F:GO:0043531; C:GO:0005829	P:gluconeogenesis; P:glycolytic process; P:positive regulation of oxidative phosphorylation; F:phosphoglycerate kinase activity; F:ATP binding; F:ADP binding; C:cytosol	EC:2.7.2.3	Phosphoglycerate kinase	IPR001576 (PRINTS); IPR015824 (G3DSA:3.40.50.GENE3D); IPR001576 (PIRSF); IPR015824 (G3DSA:3.40.50.GENE3D); IPR001576 (PFAM); IPR015824 (G3DSA:3.40.50.GENE3D); IPR001576 (PANTHER); PTHR11406:SF0 (PANTHER); IPR015911 (PROSITE_PATTERNS); IPR001576 (HAMAP); IPR001576 (CDD); IPR036043 (SUPERFAMILY)	P:GO:0006096; F:GO:0004618	P:glycolytic process; F:phosphoglycerate kinase activity
EV		DN11220_c0_g1_i12_22997	650	56392	14.3333	26	19	19	15	1.94		annexin B9-like isoform X1	TRUE	[INTERPRO, BLASTED, MAPPED, ANNOTATED]	492	20	0	65.63	1	F:GO:0043167	F:ion binding			IPR001464 (PRINTS); IPR037104 (G3DSA:1.10.220.GENE3D); IPR037104 (G3DSA:1.10.220.GENE3D); IPR037104 (G3DSA:1.10.220.GENE3D); IPR018502 (PFAM); IPR037104 (G3DSA:1.10.220.GENE3D); mobidb-lite (MOBIDB_LITE); mobidb-lite (MOBIDB_LITE); PTHR10502:SF226 (PANTHER); PTHR10502 (PANTHER); IPR018502 (PROSITE_PROFILES); IPR018502 (PROSITE_PROFILES); IPR018502 (PROSITE_PROFILES); IPR018502 (PROSITE_PROFILES);…	F:GO:0005509; F:GO:0005544	F:calcium ion binding; F:calcium-dependent phospholipid binding
EV		DN9975_c0_g1_i9_4448	274	51482	14.3333	16	12	16	12	1.1	5	non lysosomal glucosylceramidase	TRUE	[INTERPRO, BLASTED, MAPPED, ANNOTATED]	448	20	0	67.23	1	F:GO:0004553	F:hydrolase activity, hydrolyzing O-glycosyl compounds			IPR024462 (PFAM); PTHR12654 (PANTHER)	no GO terms	no GO terms
EV		DN10836_c0_g1_i4_11677	600	58447	14	26	18	15	12	1.68	4	solute carrier family 5	TRUE	[INTERPRO, BLASTED, MAPPED, ANNOTATED]	469	20	0	77.64	3	P:GO:0055085; F:GO:0022857; C:GO:0016021	P:transmembrane transport; F:transmembrane transporter activity; C:integral component of membrane			Coil (COILS); IPR001734 (TIGRFAM); IPR001734 (PFAM); IPR038377 (G3DSA:1.20.1730.GENE3D); PTHR11819 (PANTHER); IPR001734 (PROSITE_PROFILES)	P:GO:0055085; F:GO:0022857; C:GO:0016020	P:transmembrane transport; F:transmembrane transporter activity; C:membrane
EV		DN118_c0_g1_i1_52814	417	21882	13.6667	20	17	6	6	2.61	3	tegumental protein	TRUE	[INTERPRO, BLASTED, MAPPED, ANNOTATED]	99	20	6.72392e-63	80.3	2	P:GO:0007017; C:GO:0030286	P:microtubule-based process; C:dynein complex			IPR001372 (PFAM); IPR037177 (G3DSA:3.30.740.GENE3D); IPR037177 (SUPERFAMILY)	P:GO:0007017; C:GO:0030286	P:microtubule-based process; C:dynein complex
EV		DN11977_c0_g1_i2_72857	357	76076	13.6667	15	10	11	8	0.53		H17g protein tegumental antigen	TRUE	[INTERPRO, BLASTED, MAPPED, ANNOTATED]	563	20	0	87.45	2	F:GO:0003779; C:GO:0005856	F:actin binding; C:cytoskeleton			Coil (COILS); Coil (COILS); IPR000798 (PRINTS); IPR019749 (PRINTS); IPR011174 (PIRSF); IPR018979 (PFAM); IPR011259 (PFAM); IPR011993 (G3DSA:2.30.29.GENE3D); IPR018980 (PFAM); G3DSA:1.20.5.450 (GENE3D); G3DSA:3.10.20.90 (GENE3D); IPR014352 (G3DSA:1.20.80.GENE3D); IPR019748 (PFAM); IPR008954 (G3DSA:1.25.40.GENE3D); mobidb-lite (MOBIDB_LITE); mobidb-lite (MOBIDB_LITE); PTHR23281 (PANTHER); PTHR23281…	F:GO:0003779; F:GO:0008092; C:GO:0005856	F:actin binding; F:cytoskeletal protein binding; C:cytoskeleton
EV		DN9818_c0_g2_i1_37822	237	414851	13.6667	28	10	26	10	0.08		Basement membrane-specific heparan sulfate proteoglycan core protein	TRUE	[INTERPRO, BLASTED, MAPPED, ANNOTATED]	3697	20	0	68.46	1	C:GO:0016021	C:integral component of membrane			IPR013783 (G3DSA:2.60.40.GENE3D); mobidb-lite (MOBIDB_LITE); mobidb-lite (MOBIDB_LITE); mobidb-lite (MOBIDB_LITE); mobidb-lite (MOBIDB_LITE); PTHR12231 (PANTHER); IPR007110 (PROSITE_PROFILES); IPR007110 (PROSITE_PROFILES); IPR007110 (PROSITE_PROFILES); IPR007110 (PROSITE_PROFILES); IPR007110 (PROSITE_PROFILES); IPR007110 (PROSITE_PROFILES); cd00096 (CDD); IPR036179 (SUPERFAMILY)	no GO terms	no GO terms
EV		DN9865_c0_g1_i1_63028	594	48202	13.6667	24	17	13	11	1.53	5	hypothetical transcript	TRUE	[INTERPRO, BLASTED, MAPPED, ANNOTATED]	344	20	0	76.67	3	P:GO:0030833; F:GO:0043167; F:GO:0051015	P:regulation of actin filament polymerization; F:ion binding; F:actin filament binding			IPR007122 (PRINTS); IPR029006 (G3DSA:3.40.20.GENE3D); IPR029006 (G3DSA:3.40.20.GENE3D); IPR007123 (PFAM); IPR029006 (G3DSA:3.40.20.GENE3D); IPR007122 (PANTHER); PTHR11977:SF109 (PANTHER); SSF55753 (SUPERFAMILY); SSF55753 (SUPERFAMILY); SSF55753 (SUPERFAMILY)	F:GO:0051015	F:actin filament binding
EV		DN10181_c0_g1_i1_47181	139	56433	13.3333	16	6	16	6	0.41	6	cytosolic malate dehydrogenase	TRUE	[INTERPRO, BLASTED, MAPPED, ANNOTATED]	332	20	0	88.39	8	P:GO:0005975; P:GO:0006099; P:GO:0006108; P:GO:0006734; F:GO:0030060; F:GO:0042803; F:GO:0051287; C:GO:0005737	P:carbohydrate metabolic process; P:tricarboxylic acid cycle; P:malate metabolic process; P:NADH metabolic process; F:L-malate dehydrogenase activity; F:protein homodimerization activity; F:NAD binding; C:cytoplasm	EC:1.1.1.37	Malate dehydrogenase	IPR022383 (PFAM); G3DSA:3.40.50.720 (GENE3D); IPR010945 (TIGRFAM); IPR011274 (TIGRFAM); IPR001236 (PFAM); IPR015955 (G3DSA:3.90.110.GENE3D); IPR001557 (PIRSF); IPR010945 (PANTHER); IPR001252 (PROSITE_PATTERNS); IPR011274 (CDD); IPR036291 (SUPERFAMILY); IPR015955 (SUPERFAMILY)	P:GO:0005975; P:GO:0006108; P:GO:0019752; P:GO:0055114; F:GO:0003824; F:GO:0016491; F:GO:0016615; F:GO:0016616; F:GO:0030060	P:carbohydrate metabolic process; P:malate metabolic process; P:carboxylic acid metabolic process; P:oxidation-reduction process; F:catalytic activity; F:oxidoreductase activity; F:malate dehydrogenase activity; F:oxidoreductase activity, acting on the CH-OH group of donors, NAD or NADP as acceptor; F:L-malate dehydrogenase activity
EV		DN11493_c0_g1_i2_56859	145	125782	13.3333	16	6	15	5	0.17		putative anoctamin	TRUE	[INTERPRO, BLASTED, MAPPED, ANNOTATED]	551	20	0	81.82	3	P:GO:0006810; F:GO:0046983; C:GO:0016021	P:transport; F:protein dimerization activity; C:integral component of membrane			IPR007632 (PFAM); IPR007632 (PANTHER); PTHR12308:SF31 (PANTHER)	no GO terms	no GO terms
EV		DN11817_c3_g5_i1_69816	234	165049	13.3333	13	8	10	7	0.15		Plasma membrane calcium-transporting ATPase 3	TRUE	[INTERPRO, BLASTED, MAPPED, ANNOTATED]	1169	20	0	82.33	4	P:GO:0070588; F:GO:0005388; F:GO:0005524; C:GO:0016021	P:calcium ion transmembrane transport; F:calcium transmembrane transporter activity, phosphorylative mechanism; F:ATP binding; C:integral component of membrane	EC:7.2.2.10	P-type Ca(2+) transporter	PR00119 (PRINTS); IPR006068 (PFAM); PF00702 (PFAM); IPR004014 (PFAM); IPR022141 (PFAM); PF13246 (PFAM); IPR001757 (TIGRFAM); IPR006408 (TIGRFAM); PF00122 (PFAM),SFLDS00003 (SFLD),SFLDF00027 (SFLD); mobidb-lite (MOBIDB_LITE); mobidb-lite (MOBIDB_LITE); mobidb-lite (MOBIDB_LITE); mobidb-lite (MOBIDB_LITE); mobidb-lite (MOBIDB_LITE); IPR030320 (PTHR24093:PANTHER); PTHR24093 (PANTHER); IPR018303 (PRO…	P:GO:0070588; F:GO:0000166; F:GO:0005388; F:GO:0005524; C:GO:0016020; C:GO:0016021	P:calcium ion transmembrane transport; F:nucleotide binding; F:calcium transmembrane transporter activity, phosphorylative mechanism; F:ATP binding; C:membrane; C:integral component of membrane
EV		DN6547_c0_g1_i3_66219	75	21245	13.3333	6	4	5	4	0.8		Uncharacterised
EV		DN12676_c0_g1_i5_72043	547	49478	13	23	18	16	14	1.81		Annexin A13 (Annexin XIII)	TRUE	[INTERPRO, BLASTED, MAPPED, ANNOTATED]	349	20	0	75	2	F:GO:0005509; F:GO:0005544	F:calcium ion binding; F:calcium-dependent phospholipid binding			IPR001464 (PRINTS); IPR018502 (PFAM); IPR037104 (G3DSA:1.10.220.GENE3D); IPR037104 (G3DSA:1.10.220.GENE3D); IPR037104 (G3DSA:1.10.220.GENE3D); IPR037104 (G3DSA:1.10.220.GENE3D); PTHR10502 (PANTHER); IPR018502 (PROSITE_PROFILES); IPR018502 (PROSITE_PROFILES); IPR018502 (PROSITE_PROFILES); IPR037104 (SUPERFAMILY)	F:GO:0005509; F:GO:0005544	F:calcium ion binding; F:calcium-dependent phospholipid binding
EV		DN10879_c1_g1_i8_12057	381	94038	12.6667	30	16	23	13	0.67		von Willebrand factor A domain containing protein	TRUE	[INTERPRO, BLASTED]	796	20	0	73.96						IPR013694 (PFAM); IPR002035 (PFAM); IPR036465 (G3DSA:3.40.50.GENE3D); PTHR45737:SF6 (PANTHER); PTHR45737 (PANTHER); IPR002035 (PROSITE_PROFILES); IPR013694 (PROSITE_PROFILES); IPR036465 (SUPERFAMILY)	no GO terms	no GO terms
EV		DN11803_c0_g3_i1_69783	255	45463	12.6667	17	11	10	7	0.75		carbonic anhydrase	TRUE	[INTERPRO, BLASTED, MAPPED, ANNOTATED]	322	20	1.24101e-118	63.43	3	F:GO:0016829; F:GO:0046872; C:GO:0016020	F:lyase activity; F:metal ion binding; C:membrane			IPR001148 (PFAM); IPR036398 (G3DSA:3.10.200.GENE3D); IPR018431 (PTHR18952:PANTHER); IPR023561 (PANTHER); IPR018338 (PROSITE_PATTERNS); IPR001148 (PROSITE_PROFILES); cd00326 (CDD); IPR036398 (SUPERFAMILY)	F:GO:0004089; F:GO:0008270	F:carbonate dehydratase activity; F:zinc ion binding
EV		DN12342_c0_g1_i2_39792	824	58085	12.6667	30	19	19	11	1.29	4	annexin A4-like	TRUE	[INTERPRO, BLASTED, MAPPED, ANNOTATED]	493	20	0	65.95	1	F:GO:0043167	F:ion binding			IPR001464 (PRINTS); IPR037104 (G3DSA:1.10.220.GENE3D); IPR037104 (G3DSA:1.10.220.GENE3D); IPR037104 (G3DSA:1.10.220.GENE3D); IPR018502 (PFAM); IPR037104 (G3DSA:1.10.220.GENE3D); mobidb-lite (MOBIDB_LITE); mobidb-lite (MOBIDB_LITE); PTHR10502:SF226 (PANTHER); PTHR10502 (PANTHER); IPR018502 (PROSITE_PROFILES); IPR018502 (PROSITE_PROFILES); IPR018502 (PROSITE_PROFILES); IPR018502 (PROSITE_PROFILES);…	F:GO:0005509; F:GO:0005544	F:calcium ion binding; F:calcium-dependent phospholipid binding
EV		DN11263_c0_g1_i4_60744	320	47069	12.3333	16	9	13	9	0.84	2	Annexin A7	TRUE	[INTERPRO, BLASTED, MAPPED, ANNOTATED]	350	20	0	78.99	2	F:GO:0005509; F:GO:0005544	F:calcium ion binding; F:calcium-dependent phospholipid binding			IPR001464 (PRINTS); IPR037104 (G3DSA:1.10.220.GENE3D); IPR037104 (G3DSA:1.10.220.GENE3D); IPR018502 (PFAM); IPR037104 (G3DSA:1.10.220.GENE3D); IPR037104 (G3DSA:1.10.220.GENE3D); PTHR10502 (PANTHER); IPR018252 (PROSITE_PATTERNS); IPR018502 (PROSITE_PROFILES); IPR018502 (PROSITE_PROFILES); IPR018502 (PROSITE_PROFILES); IPR018502 (PROSITE_PROFILES); IPR037104 (SUPERFAMILY)	F:GO:0005509; F:GO:0005544	F:calcium ion binding; F:calcium-dependent phospholipid binding
EV	Immunomodulators	DN4288_c0_g1_i1_31793	321	95784	12.3333	21	13	18	13	0.55	2	calpain	TRUE	[INTERPRO, BLASTED, MAPPED, ANNOTATED]	754	20	0	76.76	4	P:GO:0006508; P:GO:0007586; F:GO:0004198; F:GO:0005509	P:proteolysis; P:digestion; F:calcium-dependent cysteine-type endopeptidase activity; F:calcium ion binding	EC:3.4.22; EC:3.4.22.1; EC:3.4.99; EC:3.4.22.41; EC:3.4.22.40; EC:3.4.22.34; EC:3.4.22.8; EC:3.4.22.28; EC:3.4.22.16; EC:3.4.22.27; EC:3.4.22.38; EC:3.4.22.15; EC:3.4.22.14	Acting on peptide bonds (peptidases); Cathepsin B; Acting on peptide bonds (peptidases); Cathepsin F; Bleomycin hydrolase; Legumain; Clostripain; Picornain 3C; Cathepsin H; Cathepsin S; Cathepsin K; Cathepsin L; Actinidain	Coil (COILS); IPR022684 (PRINTS); G3DSA:1.10.238.10 (GENE3D); G3DSA:2.60.120.380 (GENE3D); G3DSA:3.90.70.10 (GENE3D); IPR022682 (PFAM); IPR001300 (PFAM); PTHR10183:SF396 (PANTHER); PTHR10183 (PANTHER); IPR018247 (PROSITE_PATTERNS); IPR000169 (PROSITE_PATTERNS); IPR001300 (PROSITE_PROFILES); IPR002048 (PROSITE_PROFILES); IPR033883 (CDD); cd16182 (CDD); IPR001300 (CDD); IPR038765 (SUPERFAMILY); IPR…	P:GO:0006508; F:GO:0004198; F:GO:0005509	P:proteolysis; F:calcium-dependent cysteine-type endopeptidase activity; F:calcium ion binding
EV		DN11248_c0_g2_i1_22893	267	40946	12	21	11	11	5	0.59		unnamed protein product, partial	TRUE	[INTERPRO, BLASTED, MAPPED]	331	3	1.89237e-09	46.04	2	C:GO:0016020; C:GO:0016021	C:membrane; C:integral component of membrane			no IPS match	no IPS match	no IPS match
EV		DN11822_c0_g2_i2_55872	334	34766	12	20	11	14	9	1.73		P29	TRUE	[INTERPRO, BLASTED, MAPPED, ANNOTATED]	136	20	5.54159e-59	84.57	1	C:GO:0005737	C:cytoplasm			Coil (COILS); Coil (COILS); IPR004148 (PFAM); IPR027267 (G3DSA:1.20.1270.GENE3D); IPR004148 (PROSITE_PROFILES); IPR027267 (SUPERFAMILY)	F:GO:0005515; C:GO:0005737	F:protein binding; C:cytoplasm
EV		DN10685_c0_g1_i1_32729	393	55212	11.6667	17	14	14	12	1.25		annexin B9-like isoform X1	TRUE	[INTERPRO, BLASTED, MAPPED, ANNOTATED]	469	20	0	66.6	1	F:GO:0043167	F:ion binding			IPR001464 (PRINTS); IPR037104 (G3DSA:1.10.220.GENE3D); IPR037104 (G3DSA:1.10.220.GENE3D); IPR037104 (G3DSA:1.10.220.GENE3D); IPR037104 (G3DSA:1.10.220.GENE3D); IPR018502 (PFAM); mobidb-lite (MOBIDB_LITE); mobidb-lite (MOBIDB_LITE); PTHR10502 (PANTHER); PTHR10502:SF226 (PANTHER); IPR018502 (PROSITE_PROFILES); IPR018502 (PROSITE_PROFILES); IPR018502 (PROSITE_PROFILES); IPR018502 (PROSITE_PROFILES);…	F:GO:0005509; F:GO:0005544	F:calcium ion binding; F:calcium-dependent phospholipid binding
EV		DN10747_c0_g1_i5_35870	124	214996	11.6667	5	3	5	3	0.05		microtubule actin cross linking factor 1	TRUE	[INTERPRO, BLASTED, MAPPED]	1891	20	0	61.99	4	P:GO:0045104; P:GO:0098609; F:GO:0050839; C:GO:0030054	P:intermediate filament cytoskeleton organization; P:cell-cell adhesion; F:cell adhesion molecule binding; C:cell junction			mobidb-lite (MOBIDB_LITE); mobidb-lite (MOBIDB_LITE); mobidb-lite (MOBIDB_LITE); mobidb-lite (MOBIDB_LITE); mobidb-lite (MOBIDB_LITE); mobidb-lite (MOBIDB_LITE)	no GO terms	no GO terms
EV		DN12258_c0_g1_i7_43653	171	41181	11.6667	17	9	14	6	0.72		Annexin A13 (Annexin XIII)	TRUE	[INTERPRO, BLASTED, MAPPED, ANNOTATED]	313	20	1.26908e-172	75.82	3	F:GO:0005509; F:GO:0005544; F:GO:0016817	F:calcium ion binding; F:calcium-dependent phospholipid binding; F:hydrolase activity, acting on acid anhydrides			IPR001464 (PRINTS); IPR037104 (G3DSA:1.10.220.GENE3D); IPR018502 (PFAM); IPR037104 (G3DSA:1.10.220.GENE3D); IPR037104 (G3DSA:1.10.220.GENE3D); PTHR10502 (PANTHER); IPR018502 (PROSITE_PROFILES); IPR018502 (PROSITE_PROFILES); IPR018502 (PROSITE_PROFILES); IPR037104 (SUPERFAMILY)	F:GO:0005509; F:GO:0005544	F:calcium ion binding; F:calcium-dependent phospholipid binding
EV		DN8972_c0_g1_i1_2323	371	47626	11.6667	17	13	13	10	1.23		actin modulator protein	TRUE	[INTERPRO, BLASTED, MAPPED, ANNOTATED]	380	20	0	83.98	5	P:GO:0045010; P:GO:0051014; P:GO:0051016; F:GO:0005509; F:GO:0051015	P:actin nucleation; P:actin filament severing; P:barbed-end actin filament capping; F:calcium ion binding; F:actin filament binding			IPR007122 (PRINTS); IPR007123 (PFAM); IPR029006 (G3DSA:3.40.20.GENE3D); IPR029006 (G3DSA:3.40.20.GENE3D); IPR029006 (G3DSA:3.40.20.GENE3D); IPR007122 (PANTHER); PTHR11977:SF109 (PANTHER); cd11290 (CDD); SSF55753 (SUPERFAMILY); SSF55753 (SUPERFAMILY); SSF55753 (SUPERFAMILY)	F:GO:0051015	F:actin filament binding
EV		DN9599_c0_g3_i1_14720	140	38737	11.6667	14	4	12	4	0.39		syndecan binding protein syntenin	TRUE	[INTERPRO, BLASTED, MAPPED, ANNOTATED]	301	20	1.62914e-127	69.38	1	C:GO:0110165	C:cellular anatomical entity			IPR036034 (G3DSA:2.30.42.GENE3D); IPR001478 (PFAM); IPR036034 (G3DSA:2.30.42.GENE3D); PTHR12345 (PANTHER); PTHR12345:SF3 (PANTHER); IPR001478 (PROSITE_PROFILES); IPR001478 (PROSITE_PROFILES); cd00992 (CDD); cd00992 (CDD); IPR036034 (SUPERFAMILY); IPR036034 (SUPERFAMILY)	F:GO:0005515	F:protein binding
EV		DN12187_c0_g1_i1_66436	108	110338	11.3333	7	3	7	3	0.09		unnamed protein product	TRUE	[INTERPRO, BLASTED, MAPPED]	866	18	0	68.74	1	C:GO:0005856	C:cytoskeleton			mobidb-lite (MOBIDB_LITE); mobidb-lite (MOBIDB_LITE); mobidb-lite (MOBIDB_LITE); mobidb-lite (MOBIDB_LITE); IPR035915 (SUPERFAMILY)	no GO terms	no GO terms
EV		DN8932_c0_g1_i2_2337	310	77699	11.3333	19	12	18	12	0.64		NADP-dependent malic enzyme	TRUE	[INTERPRO, BLASTED, MAPPED, ANNOTATED]	574	20	0	80.39	4	P:GO:0055114; F:GO:0004471; F:GO:0046872; F:GO:0051287	P:oxidation-reduction process; F:malate dehydrogenase (decarboxylating) (NAD+) activity; F:metal ion binding; F:NAD binding	EC:1.1.1.38; EC:1.1.1.39	Malate dehydrogenase (oxaloacetate-decarboxylating); Malate dehydrogenase (decarboxylating)	IPR001891 (PRINTS); IPR001891 (PIRSF); IPR012301 (PFAM); G3DSA:3.40.50.720 (GENE3D); IPR012302 (PFAM); IPR037062 (G3DSA:3.40.50.GENE3D); PTHR23406 (PANTHER); PTHR23406:SF34 (PANTHER); IPR015884 (PROSITE_PATTERNS); IPR036291 (SUPERFAMILY); SSF53223 (SUPERFAMILY)	P:GO:0055114; F:GO:0004470; F:GO:0004471; F:GO:0051287	P:oxidation-reduction process; F:malic enzyme activity; F:malate dehydrogenase (decarboxylating) (NAD+) activity; F:NAD binding
EV		DN12211_c1_g1_i4_43567	280	73277	11	17	10	12	7	0.55		Deoxyhypusine hydroxylase	TRUE	[INTERPRO, BLASTED, MAPPED, ANNOTATED]	335	20	1.40464e-142	67.76	4	P:GO:0008612; P:GO:0055114; F:GO:0019135; F:GO:0046872	P:peptidyl-lysine modification to peptidyl-hypusine; P:oxidation-reduction process; F:deoxyhypusine monooxygenase activity; F:metal ion binding	EC:1.14.99.29	Deoxyhypusine monooxygenase	IPR004155 (PFAM); IPR011989 (G3DSA:1.25.10.GENE3D); PTHR12697:SF34 (PANTHER); PTHR12697 (PANTHER); IPR016024 (SUPERFAMILY)	no GO terms	no GO terms
EV		DN12296_c2_g2_i8_68465	247	44731	11	11	7	10	6	0.65		Annexin A5	TRUE	[INTERPRO, BLASTED, MAPPED, ANNOTATED]	331	20	0	73.49	2	F:GO:0005509; F:GO:0005544	F:calcium ion binding; F:calcium-dependent phospholipid binding			IPR001464 (PRINTS); IPR037104 (G3DSA:1.10.220.GENE3D); IPR037104 (G3DSA:1.10.220.GENE3D); IPR037104 (G3DSA:1.10.220.GENE3D); IPR037104 (G3DSA:1.10.220.GENE3D); IPR018502 (PFAM); PTHR10502 (PANTHER); PTHR10502:SF102 (PANTHER); IPR018252 (PROSITE_PATTERNS); IPR018252 (PROSITE_PATTERNS); IPR018502 (PROSITE_PROFILES); IPR018502 (PROSITE_PROFILES); IPR018502 (PROSITE_PROFILES); IPR018502 (PROSITE_PROF…	F:GO:0005509; F:GO:0005544	F:calcium ion binding; F:calcium-dependent phospholipid binding
EV		DN7852_c0_g1_i1_1626	191	66578	11	13	7	12	7	0.4	6	lysyl oxidase	TRUE	[INTERPRO, BLASTED, MAPPED, ANNOTATED]	508	20	0	77.89	6	P:GO:0006897; P:GO:0055114; F:GO:0005044; F:GO:0005507; F:GO:0016641; C:GO:0016020	P:endocytosis; P:oxidation-reduction process; F:scavenger receptor activity; F:copper ion binding; F:oxidoreductase activity, acting on the CH-NH2 group of donors, oxygen as acceptor; C:membrane			IPR001190 (PRINTS); IPR001695 (PRINTS); IPR036772 (G3DSA:3.10.250.GENE3D); IPR001695 (PFAM); IPR036772 (G3DSA:3.10.250.GENE3D); IPR001190 (PFAM); PTHR45817:SF4 (PANTHER); PTHR45817 (PANTHER); PTHR45817:SF4 (PANTHER); IPR001190 (PROSITE_PROFILES); IPR001190 (PROSITE_PROFILES); IPR036772 (SUPERFAMILY); IPR036772 (SUPERFAMILY)	P:GO:0055114; F:GO:0005044; F:GO:0005507; F:GO:0016641; C:GO:0016020	P:oxidation-reduction process; F:scavenger receptor activity; F:copper ion binding; F:oxidoreductase activity, acting on the CH-NH2 group of donors, oxygen as acceptor; C:membrane
EV		DN8664_c0_g1_i1_13160	151	72680	11	12	5	11	5	0.25		glycerol kinase	TRUE	[INTERPRO, BLASTED, MAPPED, ANNOTATED]	411	20	0	77.88	4	P:GO:0005975; P:GO:0016310; F:GO:0016301; F:GO:0016773	P:carbohydrate metabolic process; P:phosphorylation; F:kinase activity; F:phosphotransferase activity, alcohol group as acceptor			G3DSA:3.30.420.40 (GENE3D); IPR018485 (PFAM); IPR018484 (PFAM); G3DSA:3.30.420.40 (GENE3D); PTHR10196:SF69 (PANTHER); PTHR10196 (PANTHER); IPR018483 (PROSITE_PATTERNS); IPR043129 (SUPERFAMILY); IPR043129 (SUPERFAMILY)	P:GO:0005975; F:GO:0016773	P:carbohydrate metabolic process; F:phosphotransferase activity, alcohol group as acceptor
EV		DN11931_c2_g1_i4_58520	175	88572	10.6667	23	9	18	8	0.39		von Willebrand factor A domain containing protein	TRUE	[INTERPRO, BLASTED, MAPPED]	641	20	0	76.9	2	P:GO:0000724; P:GO:0006281	P:double-strand break repair via homologous recombination; P:DNA repair			IPR036465 (G3DSA:3.40.50.GENE3D); IPR013694 (PFAM); IPR002035 (PFAM); PTHR45737:SF6 (PANTHER); PTHR45737 (PANTHER); IPR013694 (PROSITE_PROFILES); IPR002035 (PROSITE_PROFILES); IPR036465 (SUPERFAMILY)	no GO terms	no GO terms
EV		DN1602_c0_g1_i1_69974	109	78036	10.6667	9	5	9	5	0.23		Putative actin-interacting protein 1	TRUE	[INTERPRO, BLASTED]	617	20	0	76.43						IPR015943 (G3DSA:2.130.10.GENE3D); IPR001680 (PFAM); IPR015943 (G3DSA:2.130.10.GENE3D); PTHR19856 (PANTHER); PTHR19856:SF0 (PANTHER); IPR019775 (PROSITE_PATTERNS); IPR001680 (PROSITE_PROFILES); IPR001680 (PROSITE_PROFILES); IPR001680 (PROSITE_PROFILES); IPR001680 (PROSITE_PROFILES); IPR017986 (PROSITE_PROFILES); IPR001680 (PROSITE_PROFILES); cd00200 (CDD); IPR036322 (SUPERFAMILY); SSF69322 (SUPER…	F:GO:0005515	F:protein binding
EV		DN7152_c0_g1_i2_8970	272	73954	10.6667	15	6	13	5	0.3		protein kinase C and casein kinase substrate in	TRUE	[INTERPRO, BLASTED, MAPPED, ANNOTATED]	474	20	0	83.52	3	P:GO:0016310; F:GO:0016301; C:GO:0016021	P:phosphorylation; F:kinase activity; C:integral component of membrane			Coil (COILS); IPR001452 (PRINTS); IPR027267 (G3DSA:1.20.1270.GENE3D); IPR001060 (PFAM); G3DSA:2.30.30.40 (GENE3D); IPR001452 (PFAM); mobidb-lite (MOBIDB_LITE); mobidb-lite (MOBIDB_LITE); mobidb-lite (MOBIDB_LITE); mobidb-lite (MOBIDB_LITE); PTHR23065 (PANTHER); PTHR23065:SF11 (PANTHER); IPR001452 (PROSITE_PROFILES); IPR031160 (PROSITE_PROFILES); cd11843 (CDD); IPR027267 (SUPERFAMILY); IPR036028 (…	F:GO:0005515	F:protein binding
EV		DN11187_c0_g1_i2_48677	329	33194	10.3333	13	10	9	7	1.59		endophilin B2	TRUE	[INTERPRO, BLASTED, MAPPED]	222	13	3.93802e-58	49.26	1	C:GO:0005737	C:cytoplasm			Coil (COILS); Coil (COILS); IPR004148 (PFAM); IPR027267 (G3DSA:1.20.1270.GENE3D); mobidb-lite (MOBIDB_LITE); mobidb-lite (MOBIDB_LITE); IPR027267 (SUPERFAMILY)	F:GO:0005515; C:GO:0005737	F:protein binding; C:cytoplasm
EV		DN8064_c0_g1_i1_68336	338	16913	10.3333	12	6	8	3	1.08		Uncharacterised
EV		DN8604_c0_g1_i1_49905	151	113519	10.3333	19	5	16	5	0.15		Band 3 anion transport protein	TRUE	[INTERPRO, BLASTED, MAPPED, ANNOTATED]	914	20	0	63.34	4	P:GO:0015698; P:GO:0098656; F:GO:0005452; C:GO:0016021	P:inorganic anion transport; P:anion transmembrane transport; F:inorganic anion exchanger activity; C:integral component of membrane			IPR013769 (PFAM); IPR016152 (G3DSA:3.40.930.GENE3D); G3DSA:1.10.287.570 (GENE3D); IPR011531 (PFAM); mobidb-lite (MOBIDB_LITE); IPR003020 (PANTHER); IPR016152 (SUPERFAMILY)	P:GO:0006820; F:GO:0005452; F:GO:0008509; C:GO:0016020; C:GO:0016021	P:anion transport; F:inorganic anion exchanger activity; F:anion transmembrane transporter activity; C:membrane; C:integral component of membrane
EV		DN10824_c0_g1_i8_11636	304	57674	10	19	11	14	9	0.84		annexin B9-like isoform X1	TRUE	[INTERPRO, BLASTED, MAPPED, ANNOTATED]	484	20	0	65.58	1	F:GO:0043167	F:ion binding			IPR001464 (PRINTS); IPR018502 (PFAM); IPR037104 (G3DSA:1.10.220.GENE3D); IPR037104 (G3DSA:1.10.220.GENE3D); IPR037104 (G3DSA:1.10.220.GENE3D); IPR037104 (G3DSA:1.10.220.GENE3D); mobidb-lite (MOBIDB_LITE); mobidb-lite (MOBIDB_LITE); PTHR10502:SF226 (PANTHER); PTHR10502 (PANTHER); IPR018502 (PROSITE_PROFILES); IPR018502 (PROSITE_PROFILES); IPR018502 (PROSITE_PROFILES); IPR018502 (PROSITE_PROFILES);…	F:GO:0005509; F:GO:0005544	F:calcium ion binding; F:calcium-dependent phospholipid binding
EV		DN11704_c0_g1_i7_61110	277	85995	10	21	14	15	10	0.57		Heat shock 70 kDa protein 4	TRUE	[INTERPRO, BLASTED, MAPPED, ANNOTATED]	664	20	0	95.23	3	P:GO:0006457; F:GO:0005524; F:GO:0051082	P:protein folding; F:ATP binding; F:unfolded protein binding			Coil (COILS); PR00301 (PRINTS); G3DSA:3.30.30.30 (GENE3D); IPR029047 (G3DSA:2.60.34.GENE3D); G3DSA:3.90.640.10 (GENE3D); G3DSA:3.30.420.40 (GENE3D); IPR029048 (G3DSA:1.20.1270.GENE3D); IPR013126 (PFAM); G3DSA:3.30.420.40 (GENE3D); mobidb-lite (MOBIDB_LITE); IPR013126 (PANTHER); PTHR19375:SF210 (PANTHER); IPR018181 (PROSITE_PATTERNS); IPR018181 (PROSITE_PATTERNS); IPR018181 (PROSITE_PATTERNS); cd1…	no GO terms	no GO terms
EV	Immunomodulators	DN12662_c0_g1_i1_71915	272	31740	10	13	8	10	7	1.22		glutathione S-transferase	TRUE	[INTERPRO, BLASTED, MAPPED, ANNOTATED]	134	20	2.80495e-51	72.53	1	F:GO:0016740	F:transferase activity			G3DSA:1.20.1050.130 (GENE3D); IPR004046 (PFAM); PTHR11571 (PANTHER); PTHR11571:SF222 (PANTHER); IPR010987 (PROSITE_PROFILES); IPR036282 (SUPERFAMILY)	no GO terms	no GO terms
EV		DN10354_c0_g1_i1_3720	214	133308	9.66667	15	6	12	6	0.16		paramyosin	TRUE	[INTERPRO, BLASTED, MAPPED, ANNOTATED]	863	20	0	95.58	5	F:GO:0003774; C:GO:0005576; C:GO:0016459; C:GO:0030016; C:GO:0032982	F:motor activity; C:extracellular region; C:myosin complex; C:myofibril; C:myosin filament	EC:3.6.1.15	Nucleoside-triphosphate phosphatase	Coil (COILS); Coil (COILS); Coil (COILS); Coil (COILS); Coil (COILS); Coil (COILS); IPR002928 (PFAM); G3DSA:1.20.5.340 (GENE3D); IPR042180 (G3DSA:1.20.5.GENE3D); PTHR22988:SF70 (PANTHER); PTHR22988 (PANTHER); SSF90257 (SUPERFAMILY); SSF90257 (SUPERFAMILY); SSF90257 (SUPERFAMILY); SSF57997 (SUPERFAMILY)	F:GO:0003774; C:GO:0016459	F:motor activity; C:myosin complex
EV		DN11247_c1_g1_i4_75101	105	147344	9.66667	18	2	16	2	0.04		ubiquitin modifier activating enzyme 1	TRUE	[INTERPRO, BLASTED, MAPPED, ANNOTATED]	1059	20	0	82.58	3	P:GO:0006464; F:GO:0005524; F:GO:0008641	P:cellular protein modification process; F:ATP binding; F:ubiquitin-like modifier activating enzyme activity			Coil (COILS); IPR000011 (PRINTS); G3DSA:3.40.50.12550 (GENE3D); IPR000594 (PFAM); IPR038252 (G3DSA:3.10.290.GENE3D); IPR018965 (PFAM); IPR000594 (PFAM); IPR019572 (PFAM); IPR042449 (G3DSA:3.50.50.GENE3D); IPR032420 (PFAM); IPR042063 (G3DSA:1.10.10.GENE3D); G3DSA:3.40.50.720 (GENE3D); IPR018075 (TIGRFAM); IPR042302 (G3DSA:2.40.30.GENE3D); IPR032418 (PFAM); mobidb-lite (MOBIDB_LITE); PTHR10953:SF19…	P:GO:0006464; F:GO:0008641	P:cellular protein modification process; F:ubiquitin-like modifier activating enzyme activity
EV		DN6894_c0_g1_i2_12735	152	167726	9.66667	12	5	11	5	0.1		Galectin carbohydrate recognition domain	TRUE	[INTERPRO, BLASTED, MAPPED]	891	20	0	57.43	1	F:GO:0030246	F:carbohydrate binding			G3DSA:2.60.120.200 (GENE3D); IPR001079 (PFAM); mobidb-lite (MOBIDB_LITE); mobidb-lite (MOBIDB_LITE); mobidb-lite (MOBIDB_LITE); mobidb-lite (MOBIDB_LITE); mobidb-lite (MOBIDB_LITE); mobidb-lite (MOBIDB_LITE); mobidb-lite (MOBIDB_LITE); IPR001079 (PROSITE_PROFILES); IPR013320 (SUPERFAMILY)	F:GO:0030246	F:carbohydrate binding
EV		DN10171_c0_g1_i2_35064	199	42753	9.33333	7	6	6	5	0.56		expressed conserved protein	TRUE	[INTERPRO, BLASTED]	336	2	0.000149664	48.39						mobidb-lite (MOBIDB_LITE); mobidb-lite (MOBIDB_LITE); mobidb-lite (MOBIDB_LITE); mobidb-lite (MOBIDB_LITE); mobidb-lite (MOBIDB_LITE)	no GO terms	no GO terms
EV		DN10685_c0_g1_i2_32730	274	54341	9.33333	17	10	16	9	0.8		annexin	TRUE	[INTERPRO, BLASTED, MAPPED, ANNOTATED]	451	20	0	69.12	1	F:GO:0043167	F:ion binding			IPR001464 (PRINTS); IPR037104 (G3DSA:1.10.220.GENE3D); IPR037104 (G3DSA:1.10.220.GENE3D); IPR018502 (PFAM); IPR037104 (G3DSA:1.10.220.GENE3D); IPR037104 (G3DSA:1.10.220.GENE3D); mobidb-lite (MOBIDB_LITE); mobidb-lite (MOBIDB_LITE); PTHR10502 (PANTHER); PTHR10502:SF226 (PANTHER); IPR018502 (PROSITE_PROFILES); IPR018502 (PROSITE_PROFILES); IPR018502 (PROSITE_PROFILES); IPR018502 (PROSITE_PROFILES);…	F:GO:0005509; F:GO:0005544	F:calcium ion binding; F:calcium-dependent phospholipid binding
EV		DN11220_c0_g1_i9_22996	489	42879	9.33333	23	14	20	11	1.83	5	annexin	TRUE	[INTERPRO, BLASTED, MAPPED, ANNOTATED]	348	20	3.20635e-178	76.19	2	F:GO:0005509; F:GO:0005544	F:calcium ion binding; F:calcium-dependent phospholipid binding			IPR001464 (PRINTS); IPR037104 (G3DSA:1.10.220.GENE3D); IPR018502 (PFAM); IPR037104 (G3DSA:1.10.220.GENE3D); IPR037104 (G3DSA:1.10.220.GENE3D); IPR037104 (G3DSA:1.10.220.GENE3D); PTHR10502 (PANTHER); PTHR10502:SF226 (PANTHER); IPR018502 (PROSITE_PROFILES); IPR018502 (PROSITE_PROFILES); IPR018502 (PROSITE_PROFILES); IPR018502 (PROSITE_PROFILES); IPR037104 (SUPERFAMILY)	F:GO:0005509; F:GO:0005544	F:calcium ion binding; F:calcium-dependent phospholipid binding
EV		DN11588_c0_g1_i3_75796	127	49132	9.33333	10	4	7	2	0.21	6	Mediator of RNA polymerase II transcription	TRUE	[INTERPRO, BLASTED, MAPPED, ANNOTATED]	271	20	1.5389e-136	71.41	3	P:GO:0006357; F:GO:0003712; C:GO:0016592	P:regulation of transcription by RNA polymerase II; F:transcription coregulator activity; C:mediator complex			IPR009244 (PFAM); mobidb-lite (MOBIDB_LITE); PTHR21428 (PANTHER); IPR037212 (SUPERFAMILY)	P:GO:0006357; F:GO:0003712; C:GO:0016592	P:regulation of transcription by RNA polymerase II; F:transcription coregulator activity; C:mediator complex
EV		DN10794_c0_g1_i8_9783	240	78883	9	14	9	7	5	0.28	6	unnamed protein product, partial	TRUE	[INTERPRO, BLASTED, MAPPED]	215	3	2.12906e-15	52.08	2	C:GO:0016020; C:GO:0016021	C:membrane; C:integral component of membrane			mobidb-lite (MOBIDB_LITE)	no GO terms	no GO terms
EV		DN7407_c0_g1_i1_28602	245	46080	9	12	9	11	8	0.86		14-3-3 protein epsilon isoform X1	TRUE	[INTERPRO, BLASTED, MAPPED, ANNOTATED]	255	20	2.17594e-171	86.86	6	P:GO:0040024; P:GO:0042308; P:GO:0051220; F:GO:0008134; C:GO:0005634; C:GO:0005737	P:dauer larval development; P:negative regulation of protein import into nucleus; P:cytoplasmic sequestering of protein; F:transcription factor binding; C:nucleus; C:cytoplasm			Coil (COILS); Coil (COILS); IPR000308 (PRINTS); IPR036815 (G3DSA:1.20.190.GENE3D); IPR023410 (PFAM); IPR000308 (PIRSF); PTHR18860:SF17 (PANTHER); IPR000308 (PANTHER); IPR023409 (PROSITE_PATTERNS); cd08774 (CDD); IPR036815 (SUPERFAMILY)	no GO terms	no GO terms
EV		DN8245_c0_g1_i1_16127	190	88233	9	12	7	11	7	0.29		T-cell immunomodulatory protein	TRUE	[INTERPRO, BLASTED, MAPPED, ANNOTATED]	200	20	3.19279e-115	76.83	1	C:GO:0016021	C:integral component of membrane			IPR024881 (PANTHER)	no GO terms	no GO terms
EV		DN9975_c0_g1_i2_4443	232	49018	8.66667	17	10	14	9	0.92		Non-lysosomal glucosylceramidase	TRUE	[INTERPRO, BLASTED, MAPPED, ANNOTATED]	425	20	0	67.84	1	F:GO:0004553	F:hydrolase activity, hydrolyzing O-glycosyl compounds			IPR024462 (PFAM); PTHR12654 (PANTHER)	no GO terms	no GO terms
EV		DN10213_c1_g2_i2_26882	203	44788	8.33333	16	8	15	7	0.77		annexin	TRUE	[INTERPRO, BLASTED, MAPPED, ANNOTATED]	318	20	8.31728e-179	75.39	5	P:GO:0044772; F:GO:0005509; F:GO:0005544; C:GO:0000307; C:GO:0043229	P:mitotic cell cycle phase transition; F:calcium ion binding; F:calcium-dependent phospholipid binding; C:cyclin-dependent protein kinase holoenzyme complex; C:intracellular organelle			Coil (COILS); IPR001464 (PRINTS); IPR037104 (G3DSA:1.10.220.GENE3D); IPR037104 (G3DSA:1.10.220.GENE3D); IPR037104 (G3DSA:1.10.220.GENE3D); IPR018502 (PFAM); IPR037104 (G3DSA:1.10.220.GENE3D); PTHR10502:SF226 (PANTHER); PTHR10502 (PANTHER); IPR018252 (PROSITE_PATTERNS); IPR018502 (PROSITE_PROFILES); IPR018502 (PROSITE_PROFILES); IPR018502 (PROSITE_PROFILES); IPR018502 (PROSITE_PROFILES); IPR037104…	F:GO:0005509; F:GO:0005544	F:calcium ion binding; F:calcium-dependent phospholipid binding
EV		DN10222_c0_g1_i2_1259	274	43377	8.33333	12	7	11	6	0.55	6	alpha tocopherol transfer protein	TRUE	[INTERPRO, BLASTED]	260	20	9.77975e-134	73.42						IPR001251 (PFAM); IPR036865 (G3DSA:3.40.525.GENE3D); PTHR10174 (PANTHER); IPR001251 (PROSITE_PROFILES); IPR001251 (CDD); IPR036865 (SUPERFAMILY)	no GO terms	no GO terms
EV		DN9249_c0_g1_i1_7430	208	25344	8.33333	10	5	9	4	0.86		fatty acid binding protein FABP2	TRUE	[INTERPRO, BLASTED, MAPPED]	133	20	2.5755e-39	63.58	1	F:GO:0008289	F:lipid binding			IPR000463 (PRINTS); IPR000566 (PFAM); IPR012674 (G3DSA:2.40.128.GENE3D); IPR033073 (PTHR11955:PANTHER); IPR031259 (PANTHER); IPR012674 (SUPERFAMILY)	P:GO:0050727; F:GO:0005504; F:GO:0008289	P:regulation of inflammatory response; F:fatty acid binding; F:lipid binding
EV		DN10760_c0_g1_i3_9986	201	32250	8	10	5	7	5	0.63	3	aldo keto reductase family 1 member B4	TRUE	[INTERPRO, BLASTED, MAPPED, ANNOTATED]	238	20	7.07267e-119	78.69	2	P:GO:0055114; F:GO:0016491	P:oxidation-reduction process; F:oxidoreductase activity			IPR020471 (PRINTS); IPR023210 (PFAM); IPR036812 (G3DSA:3.20.20.GENE3D); IPR020471 (PIRSF); IPR020471 (PANTHER); PTHR11732:SF482 (PANTHER); IPR018170 (PROSITE_PATTERNS); IPR018170 (PROSITE_PATTERNS); IPR023210 (CDD); IPR036812 (SUPERFAMILY)	P:GO:0055114; F:GO:0016491	P:oxidation-reduction process; F:oxidoreductase activity
EV		DN10811_c0_g1_i15_11953	255	23368	8	10	9	6	5	1.55	3	carbonyl reductase 1	TRUE	[INTERPRO, BLASTED]	189	20	4.26853e-100	81.87						IPR002347 (PRINTS); IPR002347 (PFAM); G3DSA:3.40.50.720 (GENE3D); PTHR43963:SF4 (PANTHER); PTHR43963 (PANTHER); IPR036291 (SUPERFAMILY)	P:GO:0055114	P:oxidation-reduction process
EV		DN9714_c0_g1_i3_20481	282	119463	8	14	7	13	6	0.18		Basement membrane-specific heparan sulfate proteoglycan core protein	TRUE	[INTERPRO, BLASTED]	845	20	0	76.13						IPR002172 (PRINTS); IPR013783 (G3DSA:2.60.40.GENE3D); IPR036055 (G3DSA:4.10.400.GENE3D); PF13927 (PFAM); IPR013151 (PFAM); IPR036055 (G3DSA:4.10.400.GENE3D); IPR036055 (G3DSA:4.10.400.GENE3D); IPR002172 (PFAM); IPR013783 (G3DSA:2.60.40.GENE3D); IPR013783 (G3DSA:2.60.40.GENE3D); IPR013783 (G3DSA:2.60.40.GENE3D); PTHR12231 (PANTHER); IPR023415 (PROSITE_PATTERNS); IPR002172 (PROSITE_PROFILES); IPR00…	F:GO:0005515	F:protein binding
EV		DN12196_c0_g1_i8_41451	161	23307	7.66667	10	3	7	2	0.31		aldo keto reductase family 1 member B4	TRUE	[INTERPRO, BLASTED, MAPPED, ANNOTATED]	201	20	3.13198e-98	80.54	2	P:GO:0055114; F:GO:0016491	P:oxidation-reduction process; F:oxidoreductase activity			IPR020471 (PRINTS); IPR036812 (G3DSA:3.20.20.GENE3D); IPR023210 (PFAM); IPR020471 (PANTHER); PTHR11732:SF482 (PANTHER); IPR018170 (PROSITE_PATTERNS); IPR023210 (CDD); IPR036812 (SUPERFAMILY)	P:GO:0055114; F:GO:0016491	P:oxidation-reduction process; F:oxidoreductase activity
EV		DN9626_c0_g1_i1_73563	175	52357	7.66667	10	5	9	4	0.36		basigin related	TRUE	[INTERPRO, BLASTED, MAPPED, ANNOTATED]	308	20	4.41078e-107	64.73	8	P:GO:0001682; P:GO:0006508; P:GO:0090502; F:GO:0003723; F:GO:0004198; F:GO:0004526; C:GO:0016021; C:GO:0030677	P:tRNA 5'-leader removal; P:proteolysis; P:RNA phosphodiester bond hydrolysis, endonucleolytic; F:RNA binding; F:calcium-dependent cysteine-type endopeptidase activity; F:ribonuclease P activity; C:integral component of membrane; C:ribonuclease P complex	EC:3.4.22; EC:3.4.22.1; EC:3.4.99; EC:3.1.30; EC:3.1.26; EC:3.4.22.41; EC:3.4.22.40; EC:3.1.26.5; EC:3.4.22.34; EC:3.4.22.8; EC:3.4.22.28; EC:3.4.22.16; EC:3.4.22.27; EC:3.4.22.38; EC:3.4.22.15; EC:3.4.22.14	Acting on peptide bonds (peptidases); Cathepsin B; Acting on peptide bonds (peptidases); Acting on ester bonds; Acting on ester bonds; Cathepsin F; Bleomycin hydrolase; Ribonuclease P; Legumain; Clostripain; Picornain 3C; Cathepsin H; Cathepsin S; Cathepsin K; Cathepsin L; Actinidain	IPR013783 (G3DSA:2.60.40.GENE3D); mobidb-lite (MOBIDB_LITE); IPR044157 (PTHR10075:PANTHER); IPR043204 (PANTHER); IPR007110 (PROSITE_PROFILES); cd00096 (CDD); IPR036179 (SUPERFAMILY)	P:GO:0007155; P:GO:0007411; F:GO:0005515; C:GO:0005886	P:cell adhesion; P:axon guidance; F:protein binding; C:plasma membrane
EV		DN11062_c0_g2_i2_16524	219	37773	7.33333	8	4	8	4	0.4	1	retinol dehydrogenase 11	TRUE	[INTERPRO, BLASTED]	317	20	6.76674e-159	73.06						IPR002347 (PRINTS); G3DSA:3.40.50.720 (GENE3D); IPR002347 (PFAM); PTHR43157 (PANTHER); PTHR43157:SF27 (PANTHER); PTHR43157:SF27 (PANTHER); PTHR43157 (PANTHER); cd05327 (CDD); IPR036291 (SUPERFAMILY)	P:GO:0055114	P:oxidation-reduction process
EV		DN11139_c0_g1_i1_62410	128	44198	7.33333	10	4	9	4	0.33	1	Glyceraldehyde-3-phosphate dehydrogenase	TRUE	[INTERPRO, BLASTED, MAPPED, ANNOTATED]	354	20	0	91.15	7	P:GO:0006006; P:GO:0006096; P:GO:0055114; F:GO:0004365; F:GO:0050661; F:GO:0051287; C:GO:0005737	P:glucose metabolic process; P:glycolytic process; P:oxidation-reduction process; F:glyceraldehyde-3-phosphate dehydrogenase (NAD+) (phosphorylating) activity; F:NADP binding; F:NAD binding; C:cytoplasm	EC:1.2.1.59; EC:1.2.1.12	Glyceraldehyde-3-phosphate dehydrogenase (NAD(P)(+)) (phosphorylating); Glyceraldehyde-3-phosphate dehydrogenase (phosphorylating)	IPR020831 (PRINTS); IPR020828 (PFAM); G3DSA:3.30.360.10 (GENE3D); IPR020831 (PIRSF); IPR020829 (PFAM); G3DSA:3.40.50.720 (GENE3D); IPR006424 (TIGRFAM); IPR020831 (PANTHER); IPR020830 (PROSITE_PATTERNS); SSF55347 (SUPERFAMILY); IPR036291 (SUPERFAMILY)	P:GO:0006006; P:GO:0055114; F:GO:0016620; F:GO:0050661; F:GO:0051287	P:glucose metabolic process; P:oxidation-reduction process; F:oxidoreductase activity, acting on the aldehyde or oxo group of donors, NAD or NADP as acceptor; F:NADP binding; F:NAD binding
EV		DN11178_c0_g1_i9_24359	209	48873	7.33333	15	8	13	8	0.69		alpha tocopherol transfer protein	TRUE	[INTERPRO, BLASTED]	357	20	0	73.21						G3DSA:1.10.8.20 (GENE3D); IPR036865 (G3DSA:3.40.525.GENE3D); IPR001251 (PFAM); PTHR10174 (PANTHER); IPR001251 (PROSITE_PROFILES); IPR001251 (CDD); IPR036273 (SUPERFAMILY); IPR036865 (SUPERFAMILY)	no GO terms	no GO terms
EV		DN6399_c0_g1_i2_2192	67	115009	7.33333	9	2	9	2	0.06		V type proton ATPase 116 kDa subunit a	TRUE	[INTERPRO, BLASTED, MAPPED, ANNOTATED]	896	20	0	75.22	4	P:GO:1902600; F:GO:0015078; C:GO:0000220; C:GO:0016021	P:proton transmembrane transport; F:proton transmembrane transporter activity; C:vacuolar proton-transporting V-type ATPase, V0 domain; C:integral component of membrane			Coil (COILS); IPR026028 (PIRSF); IPR002490 (PFAM); IPR002490 (PANTHER)	P:GO:1902600; F:GO:0015078; C:GO:0000220; C:GO:0033179	P:proton transmembrane transport; F:proton transmembrane transporter activity; C:vacuolar proton-transporting V-type ATPase, V0 domain; C:proton-transporting V-type ATPase, V0 domain
EV		DN8420_c0_g1_i2_7744	199	42992	7.33333	9	7	9	7	0.68		Annexin A7	TRUE	[INTERPRO, BLASTED, MAPPED, ANNOTATED]	310	20	6.64358e-154	75.86	2	F:GO:0005509; F:GO:0005544	F:calcium ion binding; F:calcium-dependent phospholipid binding			IPR001464 (PRINTS); IPR037104 (G3DSA:1.10.220.GENE3D); IPR037104 (G3DSA:1.10.220.GENE3D); IPR018502 (PFAM); IPR037104 (G3DSA:1.10.220.GENE3D); IPR037104 (G3DSA:1.10.220.GENE3D); PTHR10502:SF226 (PANTHER); PTHR10502 (PANTHER); IPR018252 (PROSITE_PATTERNS); IPR018502 (PROSITE_PROFILES); IPR018502 (PROSITE_PROFILES); IPR018502 (PROSITE_PROFILES); IPR018502 (PROSITE_PROFILES); IPR037104 (SUPERFAMILY)	F:GO:0005509; F:GO:0005544	F:calcium ion binding; F:calcium-dependent phospholipid binding
EV		DN8664_c0_g1_i2_13161	145	71797	7.33333	12	5	12	5	0.25		glycerol kinase	TRUE	[INTERPRO, BLASTED, MAPPED, ANNOTATED]	552	20	0	78.52	4	P:GO:0005975; P:GO:0016310; F:GO:0016301; F:GO:0016773	P:carbohydrate metabolic process; P:phosphorylation; F:kinase activity; F:phosphotransferase activity, alcohol group as acceptor			IPR018485 (PFAM); G3DSA:3.30.420.40 (GENE3D); G3DSA:3.30.420.40 (GENE3D); IPR000577 (PIRSF); IPR018484 (PFAM); PTHR10196 (PANTHER); PTHR10196:SF69 (PANTHER); IPR018483 (PROSITE_PATTERNS); IPR043129 (SUPERFAMILY); IPR043129 (SUPERFAMILY)	P:GO:0005975; F:GO:0016773	P:carbohydrate metabolic process; F:phosphotransferase activity, alcohol group as acceptor
EV		DN9590_c0_g2_i1_51137	210	17428	7.33333	12	7	7	3	1.9		Uncharacterised
EV		DN11340_c0_g2_i6_13360	186	46341	7	10	7	9	6	0.51		retinol dehydrogenase 11	TRUE	[INTERPRO, BLASTED, MAPPED, ANNOTATED]	331	20	7.35427e-143	71.96	1	C:GO:0016021	C:integral component of membrane			IPR002347 (PRINTS); IPR002347 (PFAM); G3DSA:3.40.50.720 (GENE3D); PTHR43157:SF45 (PANTHER); PTHR43157 (PANTHER); cd05327 (CDD); IPR036291 (SUPERFAMILY)	P:GO:0055114	P:oxidation-reduction process
EV		DN12720_c0_g3_i1_70960	167	37819	7	14	7	8	5	0.52		unnamed protein product, partial	TRUE	[INTERPRO, BLASTED, MAPPED]	233	3	7.2045e-15	53.46	2	C:GO:0016020; C:GO:0016021	C:membrane; C:integral component of membrane			mobidb-lite (MOBIDB_LITE)	no GO terms	no GO terms
EV		DN4767_c0_g1_i1_33895	69	90928	7	7	1	7	1	0.04		expressed conserved protein	TRUE	[INTERPRO, BLASTED]	746	18	0	54.78						mobidb-lite (MOBIDB_LITE); mobidb-lite (MOBIDB_LITE); mobidb-lite (MOBIDB_LITE); mobidb-lite (MOBIDB_LITE); mobidb-lite (MOBIDB_LITE); mobidb-lite (MOBIDB_LITE); mobidb-lite (MOBIDB_LITE); mobidb-lite (MOBIDB_LITE); mobidb-lite (MOBIDB_LITE); mobidb-lite (MOBIDB_LITE); mobidb-lite (MOBIDB_LITE); mobidb-lite (MOBIDB_LITE); mobidb-lite (MOBIDB_LITE); mobidb-lite (MOBIDB_LITE); mobidb-lite (MOBIDB_L…	no GO terms	no GO terms
EV		DN7797_c0_g1_i1_11009	114	41445	7	9	4	8	4	0.36		ADP-ribosylation factor	TRUE	[INTERPRO, BLASTED, MAPPED, ANNOTATED]	182	20	4.01092e-129	94.64	5	P:GO:0006886; P:GO:0016192; F:GO:0005525; C:GO:0005794; C:GO:0005886	P:intracellular protein transport; P:vesicle-mediated transport; F:GTP binding; C:Golgi apparatus; C:plasma membrane			Coil (COILS); IPR006689 (PRINTS); G3DSA:3.40.50.300 (GENE3D); IPR006689 (PFAM); IPR005225 (TIGRFAM); PTHR11711:SF383 (PANTHER); PTHR11711 (PANTHER); PS51417 (PROSITE_PROFILES); cd04150 (CDD); IPR027417 (SUPERFAMILY)	F:GO:0005525	F:GTP binding
EV		DN9481_c0_g1_i1_55273	290	50954	7	11	7	10	7	0.55	3	ornithine aminotransferase	TRUE	[INTERPRO, BLASTED, MAPPED, ANNOTATED]	431	20	0	88.89	4	F:GO:0004587; F:GO:0030170; F:GO:0050155; C:GO:0016021	F:ornithine-oxo-acid transaminase activity; F:pyridoxal phosphate binding; F:ornithine(lysine) transaminase activity; C:integral component of membrane	EC:2.6.1.13	Ornithine aminotransferase	IPR010164 (TIGRFAM); IPR015421 (G3DSA:3.40.640.GENE3D); IPR005814 (PFAM); IPR005814 (PIRSF); IPR015422 (G3DSA:3.90.1150.GENE3D); PTHR11986 (PANTHER); PTHR11986:SF118 (PANTHER); IPR005814 (PROSITE_PATTERNS); IPR005814 (CDD); IPR015424 (SUPERFAMILY)	F:GO:0003824; F:GO:0004587; F:GO:0008483; F:GO:0030170	F:catalytic activity; F:ornithine-oxo-acid transaminase activity; F:transaminase activity; F:pyridoxal phosphate binding
EV		DN10279_c0_g6_i1_14815	54	153664	6.66667	7	1	7	1	0.02		ATP binding cassette sub family A	TRUE	[INTERPRO, BLASTED, MAPPED, ANNOTATED]	1312	20	0	66.93	5	P:GO:0055085; F:GO:0005524; F:GO:0016887; F:GO:0042626; C:GO:0016021	P:transmembrane transport; F:ATP binding; F:ATPase activity; F:ATPase-coupled transmembrane transporter activity; C:integral component of membrane	EC:3.6.1.3; EC:3.6.1.15	Adenosinetriphosphatase; Nucleoside-triphosphate phosphatase	PF12698 (PFAM); IPR003439 (PFAM); G3DSA:3.40.50.300 (GENE3D); IPR003439 (PFAM); mobidb-lite (MOBIDB_LITE); mobidb-lite (MOBIDB_LITE); IPR026082 (PANTHER); IPR030369 (PTHR19229:PANTHER); IPR017871 (PROSITE_PATTERNS); IPR003439 (PROSITE_PROFILES); IPR003439 (PROSITE_PROFILES); cd03263 (CDD); cd03263 (CDD); IPR027417 (SUPERFAMILY); IPR027417 (SUPERFAMILY)	P:GO:0055085; F:GO:0005524; F:GO:0016887; F:GO:0042626; C:GO:0016021	P:transmembrane transport; F:ATP binding; F:ATPase activity; F:ATPase-coupled transmembrane transporter activity; C:integral component of membrane
EV		DN10593_c0_g1_i11_28936	192	44445	6.66667	13	9	12	9	0.91	5	putative zinc binding dehydrogenase	TRUE	[INTERPRO, BLASTED, MAPPED, ANNOTATED]	349	20	0	75.9	3	P:GO:0055114; F:GO:0016491; F:GO:0046872	P:oxidation-reduction process; F:oxidoreductase activity; F:metal ion binding			Coil (COILS); IPR013149 (PFAM); G3DSA:3.90.180.10 (GENE3D); G3DSA:3.40.50.720 (GENE3D); IPR013154 (PFAM); PTHR43981 (PANTHER); PTHR43981:SF2 (PANTHER); cd08290 (CDD); IPR036291 (SUPERFAMILY); IPR011032 (SUPERFAMILY)	P:GO:0055114	P:oxidation-reduction process
EV		DN10748_c2_g1_i6_10301	152	31897	6.66667	11	6	7	4	0.64		unnamed protein product, partial	TRUE	[INTERPRO, BLASTED, MAPPED]	291	5	1.14417e-22	50.16	2	C:GO:0016020; C:GO:0016021	C:membrane; C:integral component of membrane			mobidb-lite (MOBIDB_LITE); mobidb-lite (MOBIDB_LITE)	no GO terms	no GO terms
EV		DN10902_c1_g1_i1_852	107	37307	6.66667	13	4	11	4	0.41		Non-lysosomal glucosylceramidase	TRUE	[INTERPRO, BLASTED, MAPPED, ANNOTATED]	323	20	1.32788e-155	70.84	1	F:GO:0004553	F:hydrolase activity, hydrolyzing O-glycosyl compounds			IPR012341 (G3DSA:1.50.10.GENE3D); IPR006775 (PFAM); PTHR12654 (PANTHER); PTHR12654:SF0 (PANTHER); IPR008928 (SUPERFAMILY)	P:GO:0005975; F:GO:0004553	P:carbohydrate metabolic process; F:hydrolase activity, hydrolyzing O-glycosyl compounds
EV		DN12201_c0_g2_i5_43352	130	43119	6.66667	10	3	7	3	0.25	4	hypothetical protein EgrG_000663300	TRUE	[INTERPRO, BLASTED, MAPPED]	287	3	1.13439e-13	52.27	2	C:GO:0016020; C:GO:0016021	C:membrane; C:integral component of membrane			mobidb-lite (MOBIDB_LITE); mobidb-lite (MOBIDB_LITE); mobidb-lite (MOBIDB_LITE); mobidb-lite (MOBIDB_LITE)	no GO terms	no GO terms
EV		DN5237_c0_g1_i1_59781	81	51098	6.66667	8	4	8	4	0.28		eukaryotic initiation factor 4A	TRUE	[INTERPRO, BLASTED, MAPPED, ANNOTATED]	393	20	0	85.4	4	P:GO:0006413; F:GO:0003743; F:GO:0004386; F:GO:0005524	P:translational initiation; F:translation initiation factor activity; F:helicase activity; F:ATP binding	EC:3.6.1.3; EC:3.6.1.15	Adenosinetriphosphatase; Nucleoside-triphosphate phosphatase	G3DSA:3.40.50.300 (GENE3D); IPR001650 (PFAM); G3DSA:3.40.50.300 (GENE3D); IPR011545 (PFAM); PTHR24031 (PANTHER); PTHR24031:SF698 (PANTHER); IPR000629 (PROSITE_PATTERNS); IPR001650 (PROSITE_PROFILES); IPR014001 (PROSITE_PROFILES); IPR014014 (PROSITE_PROFILES); cd18046 (CDD); cd18787 (CDD); IPR027417 (SUPERFAMILY)	F:GO:0003676; F:GO:0004386; F:GO:0005524	F:nucleic acid binding; F:helicase activity; F:ATP binding
EV		DN8120_c0_g1_i1_66053	167	36341	6.66667	8	4	8	4	0.42		universal stress protein	TRUE	[INTERPRO, BLASTED]	175	20	8.62864e-92	76.11						IPR006015 (PRINTS); IPR006016 (PFAM); IPR014729 (G3DSA:3.40.50.GENE3D); PTHR46989 (PANTHER); cd00293 (CDD); SSF52402 (SUPERFAMILY)	no GO terms	no GO terms
EV		DN8639_c0_g2_i1_25958	338	37948	6.66667	10	7	7	5	0.65		expressed conserved protein	TRUE	[INTERPRO, BLASTED, MAPPED]	240	20	1.66222e-76	63.64	2	C:GO:0016020; C:GO:0016021	C:membrane; C:integral component of membrane			mobidb-lite (MOBIDB_LITE); mobidb-lite (MOBIDB_LITE)	no GO terms	no GO terms
EV		DN10436_c0_g1_i1_34321	108	29960	6.33333	7	3	6	2	0.37		Rho GDP-dissociation inhibitor	TRUE	[INTERPRO, BLASTED, MAPPED, ANNOTATED]	190	20	6.52866e-111	74.71	3	P:GO:0050790; F:GO:0005094; C:GO:0005737	P:regulation of catalytic activity; F:Rho GDP-dissociation inhibitor activity; C:cytoplasm			IPR000406 (PFAM); IPR024792 (G3DSA:2.70.50.GENE3D); IPR000406 (PANTHER); PTHR10980:SF3 (PANTHER); IPR014756 (SUPERFAMILY)	F:GO:0005094; C:GO:0005737	F:Rho GDP-dissociation inhibitor activity; C:cytoplasm
EV		DN10462_c0_g1_i2_8582	68	114559	6.33333	10	2	9	2	0.06		26S proteasome regulatory subunit RPN1	TRUE	[INTERPRO, BLASTED, MAPPED, ANNOTATED]	776	20	0	81.58	5	P:GO:0006325; P:GO:0042176; P:GO:0050790; F:GO:0030234; C:GO:0008540	P:chromatin organization; P:regulation of protein catabolic process; P:regulation of catalytic activity; F:enzyme regulator activity; C:proteasome regulatory particle, base subcomplex			Coil (COILS); Coil (COILS); IPR040892 (PFAM); IPR011989 (G3DSA:1.25.10.GENE3D); IPR002015 (PFAM); mobidb-lite (MOBIDB_LITE); mobidb-lite (MOBIDB_LITE); mobidb-lite (MOBIDB_LITE); IPR016643 (PTHR10943:PANTHER); PTHR10943 (PANTHER); IPR016643 (PTHR10943:PANTHER); PTHR10943 (PANTHER); IPR016024 (SUPERFAMILY)	P:GO:0042176; F:GO:0030234; C:GO:0000502	P:regulation of protein catabolic process; F:enzyme regulator activity; C:proteasome complex
EV		DN10715_c0_g2_i2_47603	95	43829	6.33333	7	4	5	3	0.34		putative carbonic anhydrase II (carbonate dehydratase II)	TRUE	[INTERPRO, BLASTED, MAPPED, ANNOTATED]	157	20	1.7344e-78	69.58	2	F:GO:0004089; F:GO:0008270	F:carbonate dehydratase activity; F:zinc ion binding	EC:4.2.1.1	Carbonic anhydrase	IPR036398 (G3DSA:3.10.200.GENE3D); IPR001148 (PFAM); PTHR18952:SF120 (PANTHER); IPR023561 (PANTHER); IPR018338 (PROSITE_PATTERNS); IPR001148 (PROSITE_PROFILES); IPR036398 (SUPERFAMILY)	F:GO:0004089; F:GO:0008270	F:carbonate dehydratase activity; F:zinc ion binding
EV		DN10723_c0_g1_i6_10228	199	45380	6.33333	15	9	13	7	0.75		Annexin A13 (Annexin XIII)	TRUE	[INTERPRO, BLASTED, MAPPED, ANNOTATED]	362	20	0	75.65	3	F:GO:0005509; F:GO:0005544; F:GO:0016817	F:calcium ion binding; F:calcium-dependent phospholipid binding; F:hydrolase activity, acting on acid anhydrides			IPR001464 (PRINTS); IPR018502 (PFAM); IPR037104 (G3DSA:1.10.220.GENE3D); IPR037104 (G3DSA:1.10.220.GENE3D); IPR037104 (G3DSA:1.10.220.GENE3D); PTHR10502 (PANTHER); IPR018502 (PROSITE_PROFILES); IPR018502 (PROSITE_PROFILES); IPR018502 (PROSITE_PROFILES); IPR037104 (SUPERFAMILY)	F:GO:0005509; F:GO:0005544	F:calcium ion binding; F:calcium-dependent phospholipid binding
EV		DN11008_c1_g1_i1_52970	103	63381	6.33333	6	3	5	3	0.16		39S ribosomal protein L54	TRUE	[INTERPRO, BLASTED, MAPPED, ANNOTATED]	141	20	7.76135e-84	82.44	1	C:GO:0005840	C:ribosome			IPR013870 (PFAM)	no GO terms	no GO terms
EV		DN1202_c0_g1_i1_62670	212	22790	6.33333	9	8	6	5	2	3	Profilin allergen	TRUE	[INTERPRO, BLASTED, MAPPED, ANNOTATED]	129	20	1.69877e-61	62.99	1	F:GO:0003779	F:actin binding			IPR005455 (PFAM); G3DSA:3.30.450.30 (GENE3D); IPR036140 (SUPERFAMILY)	F:GO:0003779	F:actin binding
EV		DN12307_c2_g1_i3_39943	212	36260	6.33333	15	5	10	5	0.55		aldo keto reductase family 1 member B4	TRUE	[INTERPRO, BLASTED, MAPPED, ANNOTATED]	278	20	9.58125e-146	79.54	2	P:GO:0055114; F:GO:0016491	P:oxidation-reduction process; F:oxidoreductase activity			IPR020471 (PRINTS); IPR023210 (PFAM); IPR036812 (G3DSA:3.20.20.GENE3D); IPR020471 (PIRSF); IPR020471 (PANTHER); PTHR11732:SF482 (PANTHER); IPR018170 (PROSITE_PATTERNS); IPR018170 (PROSITE_PATTERNS); IPR018170 (PROSITE_PATTERNS); IPR023210 (CDD); IPR036812 (SUPERFAMILY)	P:GO:0055114; F:GO:0016491	P:oxidation-reduction process; F:oxidoreductase activity
EV		DN12405_c2_g4_i1_45489	58	27409	6.33333	9	2	8	1	0.12		Uncharacterised
EV		DN4956_c0_g1_i1_17274	265	23467	6.33333	7	6	6	5	1.23	5	Calcium binding EF hand domain containing protein	TRUE	[INTERPRO, BLASTED, MAPPED, ANNOTATED]	100	20	6.24117e-46	76.73	3	P:GO:0007017; F:GO:0005509; C:GO:0030286	P:microtubule-based process; F:calcium ion binding; C:dynein complex			IPR001372 (PFAM); IPR037177 (G3DSA:3.30.740.GENE3D); IPR037177 (SUPERFAMILY)	P:GO:0007017; C:GO:0030286	P:microtubule-based process; C:dynein complex
EV		DN8296_c0_g1_i1_28547	69	25996	6.33333	6	2	5	2	0.27		Uncharacterised
EV		DN10262_c0_g3_i8_1206	96	11594	6	11	3	5	2	0.69	6	ubiquitin isoform X6	TRUE	[INTERPRO, BLASTED, MAPPED, ANNOTATED]	103	20	1.15814e-61	99.72	1	C:GO:0016021	C:integral component of membrane			IPR019956 (PRINTS); IPR000626 (PFAM); G3DSA:3.10.20.90 (GENE3D); G3DSA:3.10.20.90 (GENE3D); PTHR10666 (PANTHER); PTHR10666:SF238 (PANTHER); IPR019954 (PROSITE_PATTERNS); IPR000626 (PROSITE_PROFILES); cd01803 (CDD); cd01803 (CDD); IPR029071 (SUPERFAMILY)	F:GO:0005515	F:protein binding
EV		DN10357_c0_g1_i5_29610	146	65217	6	15	8	11	6	0.41		Alpha N acetylgalactosaminidase	TRUE	[INTERPRO, BLASTED, MAPPED, ANNOTATED]	421	20	0	74.68	3	P:GO:0005975; F:GO:0004553; C:GO:0016020	P:carbohydrate metabolic process; F:hydrolase activity, hydrolyzing O-glycosyl compounds; C:membrane			IPR002241 (PRINTS); IPR002241 (PFAM); IPR013785 (G3DSA:3.20.20.GENE3D); IPR035373 (PFAM); IPR013780 (G3DSA:2.60.40.GENE3D); IPR002241 (PANTHER); PTHR11452:SF58 (PANTHER); IPR000111 (PROSITE_PATTERNS); IPR002241 (CDD); SSF51011 (SUPERFAMILY); IPR017853 (SUPERFAMILY)	P:GO:0005975; F:GO:0003824; F:GO:0004553	P:carbohydrate metabolic process; F:catalytic activity; F:hydrolase activity, hydrolyzing O-glycosyl compounds
EV		DN10704_c1_g1_i2_35834	103	35072	6	8	5	6	3	0.44	4	unnamed protein product, partial	TRUE	[INTERPRO, BLASTED, MAPPED]	321	4	7.19644e-22	53.49	2	C:GO:0016020; C:GO:0016021	C:membrane; C:integral component of membrane			mobidb-lite (MOBIDB_LITE); mobidb-lite (MOBIDB_LITE); mobidb-lite (MOBIDB_LITE); mobidb-lite (MOBIDB_LITE); mobidb-lite (MOBIDB_LITE)	no GO terms	no GO terms
EV		DN10922_c1_g1_i5_14239	157	46870	6	12	6	10	6	0.5		Deoxyhypusine hydroxylase	TRUE	[INTERPRO, BLASTED, MAPPED, ANNOTATED]	386	20	6.89919e-143	67.85	4	P:GO:0008612; P:GO:0055114; F:GO:0019135; F:GO:0046872	P:peptidyl-lysine modification to peptidyl-hypusine; P:oxidation-reduction process; F:deoxyhypusine monooxygenase activity; F:metal ion binding	EC:1.14.99.29	Deoxyhypusine monooxygenase	IPR011989 (G3DSA:1.25.10.GENE3D); IPR004155 (PFAM); PTHR12697:SF34 (PANTHER); PTHR12697 (PANTHER); IPR016024 (SUPERFAMILY)	no GO terms	no GO terms
EV		DN11193_c0_g1_i3_62323	126	31085	6	9	3	8	3	0.36		non lysosomal glucosylceramidase	TRUE	[INTERPRO, BLASTED, MAPPED, ANNOTATED]	215	20	1.54525e-90	65.2	1	F:GO:0003824	F:catalytic activity			IPR006775 (PFAM); PTHR12654:SF0 (PANTHER); PTHR12654 (PANTHER)	F:GO:0004553	F:hydrolase activity, hydrolyzing O-glycosyl compounds
EV		DN12415_c2_g1_i9_45439	102	61582	6	13	4	8	3	0.17		non lysosomal glucosylceramidase	TRUE	[INTERPRO, BLASTED, MAPPED, ANNOTATED]	492	20	0	68.47	1	F:GO:0003824	F:catalytic activity			IPR006775 (PFAM); IPR012341 (G3DSA:1.50.10.GENE3D); PTHR12654 (PANTHER); PTHR12654:SF0 (PANTHER); IPR008928 (SUPERFAMILY)	P:GO:0005975; F:GO:0004553	P:carbohydrate metabolic process; F:hydrolase activity, hydrolyzing O-glycosyl compounds
EV		DN4632_c0_g1_i1_63339	224	36455	6	8	6	7	5	0.69		vesicle-associated membrane protein 7-like	TRUE	[INTERPRO, BLASTED, MAPPED, ANNOTATED]	228	20	9.62461e-104	67.43	2	P:GO:0016192; C:GO:0016021	P:vesicle-mediated transport; C:integral component of membrane			IPR001388 (PRINTS); G3DSA:1.20.5.110 (GENE3D); IPR001388 (PFAM); G3DSA:3.30.450.50 (GENE3D); PTHR21136 (PANTHER); PTHR21136:SF168 (PANTHER); IPR042855 (PROSITE_PROFILES); IPR010908 (CDD); SSF58038 (SUPERFAMILY); IPR011012 (SUPERFAMILY)	P:GO:0016192; C:GO:0016021	P:vesicle-mediated transport; C:integral component of membrane
EV		DN5903_c0_g1_i1_30730	118	29238	6	8	4	5	3	0.54		ras protein RABF2b	TRUE	[INTERPRO, BLASTED, MAPPED, ANNOTATED]	187	20	5.28496e-94	67.64	5	P:GO:0007186; F:GO:0003924; F:GO:0004930; F:GO:0005525; C:GO:0016021	P:G protein-coupled receptor signaling pathway; F:GTPase activity; F:G protein-coupled receptor activity; F:GTP binding; C:integral component of membrane	EC:3.6.1.15	Nucleoside-triphosphate phosphatase	PR00449 (PRINTS); IPR005225 (TIGRFAM); G3DSA:3.40.50.300 (GENE3D); IPR001806 (PFAM); PTHR47978 (PANTHER); PS51419 (PROSITE_PROFILES); cd00154 (CDD); IPR027417 (SUPERFAMILY)	F:GO:0003924; F:GO:0005525	F:GTPase activity; F:GTP binding
EV		DN8726_c0_g1_i1_26219	157	42005	6	5	4	5	4	0.35		Annexin A7	TRUE	[INTERPRO, BLASTED, MAPPED, ANNOTATED]	310	20	1.25087e-144	73.8	2	F:GO:0005509; F:GO:0005544	F:calcium ion binding; F:calcium-dependent phospholipid binding			IPR001464 (PRINTS); IPR037104 (G3DSA:1.10.220.GENE3D); IPR037104 (G3DSA:1.10.220.GENE3D); IPR018502 (PFAM); IPR037104 (G3DSA:1.10.220.GENE3D); IPR037104 (G3DSA:1.10.220.GENE3D); PTHR10502:SF226 (PANTHER); PTHR10502 (PANTHER); IPR018252 (PROSITE_PATTERNS); IPR018502 (PROSITE_PROFILES); IPR018502 (PROSITE_PROFILES); IPR018502 (PROSITE_PROFILES); IPR018502 (PROSITE_PROFILES); IPR037104 (SUPERFAMILY)	F:GO:0005509; F:GO:0005544	F:calcium ion binding; F:calcium-dependent phospholipid binding
EV	Immunomodulators	DN8870_c0_g2_i5_9689	66	117166	6	7	2	7	2	0.06		calpain A	TRUE	[INTERPRO, BLASTED, MAPPED, ANNOTATED]	700	20	0	82.6	4	P:GO:0006508; F:GO:0004198; F:GO:0005509; C:GO:0016021	P:proteolysis; F:calcium-dependent cysteine-type endopeptidase activity; F:calcium ion binding; C:integral component of membrane	EC:3.4.22; EC:3.4.22.1; EC:3.4.99; EC:3.4.22.41; EC:3.4.22.40; EC:3.4.22.34; EC:3.4.22.8; EC:3.4.22.28; EC:3.4.22.16; EC:3.4.22.27; EC:3.4.22.38; EC:3.4.22.15; EC:3.4.22.14	Acting on peptide bonds (peptidases); Cathepsin B; Acting on peptide bonds (peptidases); Cathepsin F; Bleomycin hydrolase; Legumain; Clostripain; Picornain 3C; Cathepsin H; Cathepsin S; Cathepsin K; Cathepsin L; Actinidain	IPR022684 (PRINTS); IPR001300 (PFAM); IPR022682 (PFAM); G3DSA:3.90.70.10 (GENE3D); G3DSA:2.60.120.380 (GENE3D); PTHR10183:SF396 (PANTHER); PTHR10183 (PANTHER); IPR000169 (PROSITE_PATTERNS); IPR001300 (PROSITE_PROFILES); IPR033883 (CDD); IPR001300 (CDD); IPR038765 (SUPERFAMILY); IPR036213 (SUPERFAMILY)	P:GO:0006508; F:GO:0004198	P:proteolysis; F:calcium-dependent cysteine-type endopeptidase activity
EV		DN9107_c0_g1_i1_32351	151	74769	6	13	7	13	7	0.35		transketolase	TRUE	[INTERPRO, BLASTED, MAPPED, ANNOTATED]	655	20	0	86.11	1	F:GO:0004802	F:transketolase activity	EC:2.2.1.1	Transketolase	IPR005474 (PFAM); IPR033248 (PFAM); IPR005475 (PFAM); IPR009014 (G3DSA:3.40.50.GENE3D); G3DSA:3.40.50.970 (GENE3D); G3DSA:3.40.50.970 (GENE3D); PTHR43195 (PANTHER); IPR020826 (PROSITE_PATTERNS); cd07033 (CDD); IPR005474 (CDD); IPR029061 (SUPERFAMILY); IPR029061 (SUPERFAMILY); IPR009014 (SUPERFAMILY)	F:GO:0003824	F:catalytic activity
EV		DN10230_c1_g1_i2_1253	70	100351	5.66667	5	2	5	2	0.07		putative hepatocyte growth factor-regulated tyrosine kinase substrate (hgs)	TRUE	[INTERPRO, BLASTED, MAPPED, ANNOTATED]	762	20	0	69.15	2	P:GO:0006886; F:GO:0046872	P:intracellular protein transport; F:metal ion binding			Coil (COILS); Coil (COILS); Coil (COILS); IPR002014 (PFAM); IPR008942 (G3DSA:1.25.40.GENE3D); IPR024641 (PFAM); IPR013083 (G3DSA:3.30.40.GENE3D); IPR000306 (PFAM); IPR017073 (PIRSF); mobidb-lite (MOBIDB_LITE); mobidb-lite (MOBIDB_LITE); mobidb-lite (MOBIDB_LITE); mobidb-lite (MOBIDB_LITE); mobidb-lite (MOBIDB_LITE); mobidb-lite (MOBIDB_LITE); mobidb-lite (MOBIDB_LITE); mobidb-lite (MOBIDB_LITE); …	P:GO:0006886; F:GO:0046872	P:intracellular protein transport; F:metal ion binding
EV	Immunomodulators	DN10391_c0_g1_i20_3761	68	26091	5.66667	11	2	7	2	0.27		Leukocyte surface antigen CD53	TRUE	[INTERPRO, BLASTED, MAPPED, ANNOTATED]	201	20	3.01716e-70	68.92	1	C:GO:0016020	C:membrane			IPR000301 (PRINTS); IPR018499 (PFAM); IPR000301 (PIRSF); IPR008952 (G3DSA:1.10.1450.GENE3D); PTHR19282 (PANTHER); PTHR19282:SF39 (PANTHER); cd03127 (CDD); IPR008952 (SUPERFAMILY)	C:GO:0016021	C:integral component of membrane
EV	Immunomodulators	DN10645_c0_g1_i6_57768	207	52550	5.66667	8	7	8	7	0.53	1	serine protease inhibitor	TRUE	[INTERPRO, BLASTED, MAPPED, ANNOTATED]	241	20	6.59011e-109	73.65	1	C:GO:0005615	C:extracellular space			IPR023796 (PFAM); IPR042185 (G3DSA:2.30.39.GENE3D); IPR042178 (G3DSA:3.30.497.GENE3D); IPR042185 (G3DSA:2.30.39.GENE3D); IPR000215 (PANTHER); IPR015557 (PTHR11461:PANTHER); IPR023795 (PROSITE_PATTERNS); cd00172 (CDD); IPR036186 (SUPERFAMILY)	F:GO:0004867; C:GO:0005615	F:serine-type endopeptidase inhibitor activity; C:extracellular space
EV		DN10766_c0_g1_i1_60329	74	83555	5.66667	11	2	10	2	0.08		RhoGAP domain containing protein	TRUE	[INTERPRO, BLASTED, MAPPED, ANNOTATED]	636	20	6.2716e-157	54.17	3	P:GO:0007165; P:GO:0016043; C:GO:0110165	P:signal transduction; P:cellular component organization; C:cellular anatomical entity			Coil (COILS); IPR000198 (PFAM); IPR008936 (G3DSA:1.10.555.GENE3D); mobidb-lite (MOBIDB_LITE); mobidb-lite (MOBIDB_LITE); mobidb-lite (MOBIDB_LITE); mobidb-lite (MOBIDB_LITE); mobidb-lite (MOBIDB_LITE); mobidb-lite (MOBIDB_LITE); mobidb-lite (MOBIDB_LITE); PTHR45808 (PANTHER); IPR000198 (PROSITE_PROFILES); cd00159 (CDD); IPR008936 (SUPERFAMILY)	P:GO:0007165	P:signal transduction
EV	Immunomodulators	DN12118_c0_g2_i1_41622	122	36706	5.66667	6	3	4	2	0.3	6	Leukocyte surface antigen CD53	TRUE	[INTERPRO, BLASTED, MAPPED, ANNOTATED]	244	20	5.57603e-71	70.46	1	C:GO:0016020	C:membrane			IPR000301 (PRINTS); IPR008952 (G3DSA:1.10.1450.GENE3D); IPR018499 (PFAM); IPR000301 (PIRSF); PTHR19282:SF39 (PANTHER); PTHR19282 (PANTHER); cd03127 (CDD); IPR008952 (SUPERFAMILY)	C:GO:0016021	C:integral component of membrane
EV		DN12262_c0_g1_i1_68587	196	55472	5.66667	8	8	7	7	0.59	2	expressed conserved protein	TRUE	[INTERPRO, BLASTED]	408	10	1.00926e-63	62.53						IPR043792 (PFAM); mobidb-lite (MOBIDB_LITE); mobidb-lite (MOBIDB_LITE); mobidb-lite (MOBIDB_LITE); mobidb-lite (MOBIDB_LITE); mobidb-lite (MOBIDB_LITE); mobidb-lite (MOBIDB_LITE); mobidb-lite (MOBIDB_LITE)	no GO terms	no GO terms
EV		DN12350_c0_g1_i1_64773	52	324594	5.66667	3	1	3	1	0.03		Importin subunit beta-1	TRUE	[INTERPRO, BLASTED, MAPPED, ANNOTATED]	931	20	0	84.45	2	P:GO:0006606; F:GO:0008536	P:protein import into nucleus; F:Ran GTPase binding			IPR011989 (G3DSA:1.25.10.GENE3D); IPR001494 (PFAM); PF13513 (PFAM); IPR040122 (PANTHER); PTHR10527:SF1 (PANTHER); IPR021133 (PROSITE_PROFILES); IPR001494 (PROSITE_PROFILES); IPR016024 (SUPERFAMILY)	P:GO:0006606; P:GO:0006886; F:GO:0008536	P:protein import into nucleus; P:intracellular protein transport; F:Ran GTPase binding
EV		DN6832_c0_g1_i2_76806	90	41996	5.66667	9	3	9	3	0.26		inorganic pyrophosphatase	TRUE	[INTERPRO, BLASTED, MAPPED, ANNOTATED]	337	20	0	84.32	4	P:GO:0006796; F:GO:0000287; F:GO:0004427; C:GO:0005737	P:phosphate-containing compound metabolic process; F:magnesium ion binding; F:inorganic diphosphatase activity; C:cytoplasm	EC:3.6.1.1	Inorganic diphosphatase	IPR008162 (PFAM); IPR036649 (G3DSA:3.90.80.GENE3D); IPR008162 (PANTHER); PTHR10286:SF50 (PANTHER); IPR008162 (PROSITE_PATTERNS); IPR008162 (CDD); IPR036649 (SUPERFAMILY)	P:GO:0006796; F:GO:0000287; F:GO:0004427; C:GO:0005737	P:phosphate-containing compound metabolic process; F:magnesium ion binding; F:inorganic diphosphatase activity; C:cytoplasm
EV		DN8463_c0_g1_i1_20536	180	24293	5.66667	11	6	7	5	1.17		Thioredoxin fold	TRUE	[INTERPRO, BLASTED, MAPPED]	116	20	1.37022e-69	75.33	6	P:GO:0006662; P:GO:0022900; P:GO:0045454; P:GO:0055114; F:GO:0009055; F:GO:0015035	P:glycerol ether metabolic process; P:electron transport chain; P:cell redox homeostasis; P:oxidation-reduction process; F:electron transfer activity; F:protein disulfide oxidoreductase activity			IPR013766 (PFAM); IPR036249 (G3DSA:3.40.30.GENE3D); cd02947 (CDD); IPR036249 (SUPERFAMILY)	no GO terms	no GO terms
EV		DN9932_c0_g2_i1_42834	99	59939	5.66667	9	5	8	4	0.31		UDP-glucose 4-epimerase GalE	TRUE	[INTERPRO, BLASTED, MAPPED, ANNOTATED]	349	20	0	83.5	2	P:GO:0006012; F:GO:0003978	P:galactose metabolic process; F:UDP-glucose 4-epimerase activity	EC:5.1.3.2	UDP-glucose 4-epimerase	PR01713 (PRINTS); IPR005886 (TIGRFAM); IPR016040 (PFAM); G3DSA:3.40.50.720 (GENE3D); G3DSA:3.90.25.10 (GENE3D); PTHR43725 (PANTHER); PTHR43725:SF14 (PANTHER); IPR005886 (CDD); IPR036291 (SUPERFAMILY)	P:GO:0006012; F:GO:0003978	P:galactose metabolic process; F:UDP-glucose 4-epimerase activity
EV		DN10264_c0_g1_i1_14769	93	37320	5.33333	6	1	6	1	0.09		No hit	TRUE	[INTERPRO, NO-BLAST]	301									mobidb-lite (MOBIDB_LITE); mobidb-lite (MOBIDB_LITE); mobidb-lite (MOBIDB_LITE); mobidb-lite (MOBIDB_LITE); mobidb-lite (MOBIDB_LITE); mobidb-lite (MOBIDB_LITE)	no GO terms	no GO terms
EV	Immunomodulators	DN10391_c0_g1_i14_3757	202	37944	5.33333	8	7	3	2	0.4	1	Leukocyte surface antigen CD53	TRUE	[INTERPRO, BLASTED, MAPPED, ANNOTATED]	226	20	7.37773e-77	70.83	1	C:GO:0016020	C:membrane			IPR000301 (PRINTS); IPR000301 (PIRSF); IPR008952 (G3DSA:1.10.1450.GENE3D); IPR018499 (PFAM); PTHR19282:SF39 (PANTHER); PTHR19282 (PANTHER); cd03127 (CDD); IPR008952 (SUPERFAMILY)	C:GO:0016021	C:integral component of membrane
EV		DN10418_c0_g1_i4_8846	124	44880	5.33333	10	7	9	7	0.64	5	alpha tocopherol transfer protein	TRUE	[INTERPRO, BLASTED]	268	20	4.10751e-148	78.72						IPR036865 (G3DSA:3.40.525.GENE3D); IPR001251 (PFAM); PTHR10174 (PANTHER); IPR001251 (PROSITE_PROFILES); IPR001251 (CDD); IPR036865 (SUPERFAMILY)	no GO terms	no GO terms
EV		DN10607_c0_g1_i1_6892	102	65134	5.33333	7	3	6	2	0.16		neutral amino acid transporter A	TRUE	[INTERPRO, BLASTED, MAPPED, ANNOTATED]	484	20	0	78.33	3	P:GO:0055085; F:GO:0015293; C:GO:0016021	P:transmembrane transport; F:symporter activity; C:integral component of membrane			PR00173 (PRINTS); IPR001991 (PFAM); IPR036458 (G3DSA:1.10.3860.GENE3D); PTHR11958 (PANTHER); IPR036458 (SUPERFAMILY)	F:GO:0015293; C:GO:0016021	F:symporter activity; C:integral component of membrane
EV		DN10717_c0_g1_i1_35798	77	85630	5.33333	6	3	5	2	0.12		High affinity cationic amino acid transporter 1	TRUE	[INTERPRO, BLASTED, MAPPED, ANNOTATED]	677	20	0	72.73	5	P:GO:0006486; P:GO:0055085; F:GO:0022857; C:GO:0008250; C:GO:0016021	P:protein glycosylation; P:transmembrane transport; F:transmembrane transporter activity; C:oligosaccharyltransferase complex; C:integral component of membrane			G3DSA:1.20.1740.10 (GENE3D); IPR002293 (PFAM); IPR029485 (PFAM); mobidb-lite (MOBIDB_LITE); mobidb-lite (MOBIDB_LITE); PTHR43243 (PANTHER)	P:GO:0055085; F:GO:0022857; C:GO:0016020	P:transmembrane transport; F:transmembrane transporter activity; C:membrane
EV		DN10848_c0_g1_i6_24787	98	106752	5.33333	7	2	6	2	0.06		NEDD4-like E3 ubiquitin-protein ligase WWP1	TRUE	[INTERPRO, BLASTED, MAPPED, ANNOTATED]	814	20	0	74.57	8	P:GO:0006511; P:GO:0006614; P:GO:0016567; F:GO:0003924; F:GO:0005525; F:GO:0008312; F:GO:0061630; C:GO:0048500	P:ubiquitin-dependent protein catabolic process; P:SRP-dependent cotranslational protein targeting to membrane; P:protein ubiquitination; F:GTPase activity; F:GTP binding; F:7S RNA binding; F:ubiquitin protein ligase activity; C:signal recognition particle	EC:3.6.1.15	Nucleoside-triphosphate phosphatase	IPR001202 (PFAM); G3DSA:2.20.70.10 (GENE3D); IPR024928 (PIRSF); G3DSA:3.30.2410.10 (GENE3D); G3DSA:3.30.2160.10 (GENE3D); G3DSA:2.20.70.10 (GENE3D); G3DSA:2.20.70.10 (GENE3D); G3DSA:3.90.1750.10 (GENE3D); IPR000569 (PFAM); mobidb-lite (MOBIDB_LITE); mobidb-lite (MOBIDB_LITE); mobidb-lite (MOBIDB_LITE); PTHR11254 (PANTHER); PTHR11254:SF66 (PANTHER); IPR001202 (PROSITE_PATTERNS); IPR001202 (PROSITE…	P:GO:0006511; F:GO:0004842; F:GO:0005515; F:GO:0061630	P:ubiquitin-dependent protein catabolic process; F:ubiquitin-protein transferase activity; F:protein binding; F:ubiquitin protein ligase activity
EV		DN11186_c0_g2_i2_62256	72	72879	5.33333	3	2	3	2	0.09	1	carbonic anhydrase	TRUE	[INTERPRO, BLASTED, MAPPED, ANNOTATED]	321	20	1.34506e-145	65.55	3	F:GO:0004089; F:GO:0008270; C:GO:0016020	F:carbonate dehydratase activity; F:zinc ion binding; C:membrane	EC:4.2.1.1	Carbonic anhydrase	IPR036398 (G3DSA:3.10.200.GENE3D); IPR001148 (PFAM); IPR023561 (PANTHER); IPR018431 (PTHR18952:PANTHER); IPR018338 (PROSITE_PATTERNS); IPR001148 (PROSITE_PROFILES); cd00326 (CDD); IPR036398 (SUPERFAMILY)	F:GO:0004089; F:GO:0008270	F:carbonate dehydratase activity; F:zinc ion binding
EV		DN11320_c0_g1_i5_13674	127	51897	5.33333	12	3	7	2	0.2		hypothetical protein EgrG_000663300	TRUE	[INTERPRO, BLASTED, MAPPED]	382	3	8.38056e-14	49.27	2	C:GO:0016020; C:GO:0016021	C:membrane; C:integral component of membrane			mobidb-lite (MOBIDB_LITE); mobidb-lite (MOBIDB_LITE)	no GO terms	no GO terms
EV		DN11803_c0_g1_i2_69784	156	60452	5.33333	6	4	6	4	0.24	1	carbonic anhydrase	TRUE	[INTERPRO, BLASTED, MAPPED, ANNOTATED]	302	20	4.4527e-146	65.71	3	F:GO:0004089; F:GO:0008270; C:GO:0016020	F:carbonate dehydratase activity; F:zinc ion binding; C:membrane	EC:4.2.1.1	Carbonic anhydrase	IPR036398 (G3DSA:3.10.200.GENE3D); IPR001148 (PFAM); IPR023561 (PANTHER); IPR018431 (PTHR18952:PANTHER); IPR018338 (PROSITE_PATTERNS); IPR001148 (PROSITE_PROFILES); cd00326 (CDD); IPR036398 (SUPERFAMILY)	F:GO:0004089; F:GO:0008270	F:carbonate dehydratase activity; F:zinc ion binding
EV		DN12395_c0_g6_i1_39527	169	8973	5.33333	7	3	2	1	0.93	4	Uncharacterised
EV		DN6280_c0_g1_i1_1572	76	114126	5.33333	4	1	4	1	0.03		Dynamin GTPase effector domain containing protein	TRUE	[INTERPRO, BLASTED, MAPPED, ANNOTATED]	910	20	0	87.77	2	F:GO:0003924; F:GO:0005525	F:GTPase activity; F:GTP binding	EC:3.6.1.15	Nucleoside-triphosphate phosphatase	Coil (COILS); IPR022812 (PRINTS); G3DSA:1.20.120.1240 (GENE3D); IPR000375 (PFAM); IPR022812 (PFAM); G3DSA:3.40.50.300 (GENE3D); IPR011993 (G3DSA:2.30.29.GENE3D); IPR003130 (PFAM); mobidb-lite (MOBIDB_LITE); mobidb-lite (MOBIDB_LITE); mobidb-lite (MOBIDB_LITE); mobidb-lite (MOBIDB_LITE); mobidb-lite (MOBIDB_LITE); PTHR11566:SF54 (PANTHER); IPR022812 (PANTHER); IPR019762 (PROSITE_PATTERNS); IPR0018…	F:GO:0003924; F:GO:0005525	F:GTPase activity; F:GTP binding
EV		DN6526_c0_g1_i1_15802	126	53809	5.33333	6	4	6	4	0.27		Actin-related protein 2/3 complex subunit 1A	TRUE	[INTERPRO, BLASTED, MAPPED, ANNOTATED]	378	20	0	82.26	4	P:GO:0034314; F:GO:0003779; C:GO:0005737; C:GO:0005885	P:Arp2/3 complex-mediated actin nucleation; F:actin binding; C:cytoplasm; C:Arp2/3 protein complex			IPR015943 (G3DSA:2.130.10.GENE3D); IPR017383 (PIRSF); IPR001680 (PFAM); IPR017383 (PANTHER); IPR001680 (PROSITE_PROFILES); IPR017986 (PROSITE_PROFILES); IPR036322 (SUPERFAMILY)	P:GO:0030833; P:GO:0034314; F:GO:0005515; C:GO:0005885; C:GO:0015629	P:regulation of actin filament polymerization; P:Arp2/3 complex-mediated actin nucleation; F:protein binding; C:Arp2/3 protein complex; C:actin cytoskeleton
EV		DN7686_c0_g1_i1_8310	138	40404	5.33333	5	3	5	3	0.27		Uncharacterised
EV		DN8091_c0_g1_i1_68351	238	28150	5.33333	6	4	5	4	0.56	2	AChain A, calmodulin	TRUE	[INTERPRO, BLASTED, MAPPED, ANNOTATED]	155	20	1.0814e-72	80.76	44	P:GO:0000165; P:GO:0000226; P:GO:0002027; P:GO:0002576; P:GO:0005513; P:GO:0005980; P:GO:0007223; P:GO:0010800; P:GO:0010801; P:GO:0010881; P:GO:0016032; P:GO:0022400; P:GO:0031954; P:GO:0032465; P:GO:0032516; P:GO:0038095; P:GO:0043647; P:GO:0050999; P:GO:0051343; P:GO:0060315; P:GO:0060316; P:GO:0071902; P:GO:1901844; F:GO:0005509; F:GO:0008179; F:GO:0010856; F:GO:0019855; F:GO:0019901; F:GO:00…	P:MAPK cascade; P:microtubule cytoskeleton organization; P:regulation of heart rate; P:platelet degranulation; P:detection of calcium ion; P:glycogen catabolic process; P:Wnt signaling pathway, calcium modulating pathway; P:positive regulation of peptidyl-threonine phosphorylation; P:negative regulation of peptidyl-threonine phosphorylation; P:regulation of cardiac muscle contraction by regulatio…			PR00450 (PRINTS); G3DSA:1.10.238.10 (GENE3D); G3DSA:1.10.238.10 (GENE3D); G3DSA:1.10.238.10 (GENE3D); IPR002048 (PFAM); PTHR23050:SF427 (PANTHER); PTHR23050 (PANTHER); IPR018247 (PROSITE_PATTERNS); IPR018247 (PROSITE_PATTERNS); IPR018247 (PROSITE_PATTERNS); IPR018247 (PROSITE_PATTERNS); IPR002048 (PROSITE_PROFILES); IPR002048 (PROSITE_PROFILES); IPR002048 (PROSITE_PROFILES); IPR002048 (PROSITE_PR…	F:GO:0005509	F:calcium ion binding
EV		DN8098_c0_g1_i2_17952	99	64905	5.33333	7	4	6	4	0.22	5	expressed conserved protein	TRUE	[INTERPRO, BLASTED]	391	15	1.67896e-74	55.62						mobidb-lite (MOBIDB_LITE); mobidb-lite (MOBIDB_LITE); mobidb-lite (MOBIDB_LITE); mobidb-lite (MOBIDB_LITE); mobidb-lite (MOBIDB_LITE); mobidb-lite (MOBIDB_LITE)	no GO terms	no GO terms
EV		DN10391_c0_g1_i11_3753	71	23402	5	5	2	4	2	0.31	3	Leukocyte surface antigen CD53	TRUE	[INTERPRO, BLASTED, MAPPED, ANNOTATED]	106	20	1.45311e-26	78.79	1	C:GO:0016021	C:integral component of membrane			IPR000301 (PRINTS); IPR018499 (PFAM)	C:GO:0016021	C:integral component of membrane
EV		DN10573_c0_g1_i1_3170	164	25893	5	8	5	7	5	0.83		myoferlin isoform X14	TRUE	[INTERPRO, BLASTED, MAPPED, ANNOTATED]	178	20	1.93118e-65	75.25	2	P:GO:0007520; C:GO:0016021	P:myoblast fusion; C:integral component of membrane			IPR000008 (PRINTS); IPR000008 (PFAM); IPR035892 (G3DSA:2.60.40.GENE3D); PTHR45911 (PANTHER); IPR000008 (PROSITE_PROFILES); SSF49562 (SUPERFAMILY)	no GO terms	no GO terms
EV		DN10591_c0_g3_i1_28994	115	70826	5	8	3	8	3	0.15		BRO1 domain-containing protein BROX	TRUE	[INTERPRO, BLASTED]	489	20	0	68.58						Coil (COILS); IPR004328 (PFAM); IPR038499 (G3DSA:1.25.40.GENE3D); mobidb-lite (MOBIDB_LITE); mobidb-lite (MOBIDB_LITE); mobidb-lite (MOBIDB_LITE); IPR038898 (PANTHER); PTHR23032:SF1 (PANTHER); IPR004328 (PROSITE_PROFILES)	no GO terms	no GO terms
EV	Immunomodulators	DN10610_c6_g1_i8_20266	216	61296	5	10	5	9	4	0.3		glycoprotein Antigen 5	TRUE	[INTERPRO, BLASTED, MAPPED, ANNOTATED]	444	20	0	67.53	2	P:GO:0006508; F:GO:0004252	P:proteolysis; F:serine-type endopeptidase activity	EC:3.4.21.73; EC:3.4.24.7; EC:3.4.21.71; EC:3.4.24.3; EC:3.4.21.34; EC:3.4.21.78; EC:3.4.21.75; EC:3.4.21.26; EC:3.4.21.27; EC:3.4.21.68; EC:3.4.21.69; EC:3.4.24.34; EC:3.4.21.41; EC:3.4.21.83; EC:3.4.21.88; EC:3.4.21.45; EC:3.4.21.89; EC:3.4.21.42; EC:3.4.19.1; EC:3.4.21.43; EC:3.4.21.87; EC:3.4.21.38; EC:3.4.21.35; EC:3.4.21.79; EC:3.4.21.36; EC:3.4.21.102; EC:3.4.21.39; EC:3.4.21; EC:3.4.21.4;…	U-plasminogen activator; Interstitial collagenase; Pancreatic elastase II; Microbial collagenase; Plasma kallikrein; Granzyme A; Furin; Prolyl oligopeptidase; Coagulation factor XIa; T-plasminogen activator; Protein C (activated); Neutrophil collagenase; Complement subcomponent C1r; Oligopeptidase B; Repressor LexA; Complement factor I; Signal peptidase I; Complement subcomponent C1s; Acylaminoac…	Coil (COILS); IPR001314 (PRINTS); IPR043504 (G3DSA:2.40.10.GENE3D); IPR043504 (G3DSA:2.40.10.GENE3D); IPR001254 (PFAM); IPR043504 (G3DSA:2.40.10.GENE3D); mobidb-lite (MOBIDB_LITE); PTHR24260 (PANTHER); IPR018114 (PROSITE_PATTERNS); IPR001254 (PROSITE_PROFILES); IPR001254 (CDD); IPR009003 (SUPERFAMILY)	P:GO:0006508; F:GO:0004252	P:proteolysis; F:serine-type endopeptidase activity
EV	Immunomodulators	DN11280_c0_g3_i1_60806	82	122588	5	8	3	7	2	0.08		calpain A	TRUE	[INTERPRO, BLASTED, MAPPED, ANNOTATED]	699	20	0	82.23	4	P:GO:0006508; F:GO:0004198; F:GO:0005509; C:GO:0016021	P:proteolysis; F:calcium-dependent cysteine-type endopeptidase activity; F:calcium ion binding; C:integral component of membrane	EC:3.4.22; EC:3.4.22.1; EC:3.4.99; EC:3.4.22.41; EC:3.4.22.40; EC:3.4.22.34; EC:3.4.22.8; EC:3.4.22.28; EC:3.4.22.16; EC:3.4.22.27; EC:3.4.22.38; EC:3.4.22.15; EC:3.4.22.14	Acting on peptide bonds (peptidases); Cathepsin B; Acting on peptide bonds (peptidases); Cathepsin F; Bleomycin hydrolase; Legumain; Clostripain; Picornain 3C; Cathepsin H; Cathepsin S; Cathepsin K; Cathepsin L; Actinidain	IPR022684 (PRINTS); G3DSA:3.90.70.10 (GENE3D); IPR022682 (PFAM); G3DSA:2.60.120.380 (GENE3D); IPR001300 (PFAM); PTHR10183:SF396 (PANTHER); PTHR10183 (PANTHER); IPR000169 (PROSITE_PATTERNS); IPR001300 (PROSITE_PROFILES); IPR033883 (CDD); IPR001300 (CDD); IPR036213 (SUPERFAMILY); IPR038765 (SUPERFAMILY)	P:GO:0006508; F:GO:0004198	P:proteolysis; F:calcium-dependent cysteine-type endopeptidase activity
EV		DN12285_c1_g2_i16_43504	65	18979	5	8	3	3	2	0.63		unnamed protein product, partial	TRUE	[INTERPRO, BLASTED]	170	1	6.38796e-08	44.76						mobidb-lite (MOBIDB_LITE); mobidb-lite (MOBIDB_LITE)	no GO terms	no GO terms
EV	Immunomodulators	DN12464_c0_g1_i3_71373	106	50095	5	6	3	6	3	0.21		unnamed protein product	TRUE	[INTERPRO, BLASTED, MAPPED]	184	20	3.70329e-66	67.72	1	C:GO:0005615	C:extracellular space			IPR023796 (PFAM); IPR042178 (G3DSA:3.30.497.GENE3D); IPR042185 (G3DSA:2.30.39.GENE3D); IPR015557 (PTHR11461:PANTHER); IPR000215 (PANTHER); IPR023795 (PROSITE_PATTERNS); IPR036186 (SUPERFAMILY)	F:GO:0004867; C:GO:0005615	F:serine-type endopeptidase inhibitor activity; C:extracellular space
EV		DN4232_c0_g1_i1_69936	117	22527	5	6	3	6	3	0.52		actin depolymerizing factor	TRUE	[INTERPRO, BLASTED, MAPPED, ANNOTATED]	137	20	5.525e-61	75.27	8	P:GO:0006412; P:GO:0030042; F:GO:0003723; F:GO:0003735; F:GO:0003779; C:GO:0005634; C:GO:0005840; C:GO:0015629	P:translation; P:actin filament depolymerization; F:RNA binding; F:structural constituent of ribosome; F:actin binding; C:nucleus; C:ribosome; C:actin cytoskeleton			IPR017904 (PRINTS); IPR029006 (G3DSA:3.40.20.GENE3D); IPR002108 (PFAM); IPR017904 (PANTHER); PTHR11913:SF12 (PANTHER); IPR002108 (PROSITE_PROFILES); IPR017904 (CDD); SSF55753 (SUPERFAMILY)	P:GO:0030042; F:GO:0003779; C:GO:0015629	P:actin filament depolymerization; F:actin binding; C:actin cytoskeleton
EV		DN7647_c0_g1_i1_34152	102	44381	5	5	3	5	3	0.24		endophilin A3	TRUE	[INTERPRO, BLASTED, MAPPED, ANNOTATED]	325	20	1.17559e-96	59.3	10	P:GO:0031175; P:GO:0031323; P:GO:0043933; P:GO:0048259; P:GO:0048488; P:GO:0060255; F:GO:0005515; C:GO:0005768; C:GO:0005829; C:GO:0098793	P:neuron projection development; P:regulation of cellular metabolic process; P:protein-containing complex subunit organization; P:regulation of receptor-mediated endocytosis; P:synaptic vesicle endocytosis; P:regulation of macromolecule metabolic process; F:protein binding; C:endosome; C:cytosol; C:presynapse			Coil (COILS); Coil (COILS); PR00499 (PRINTS); IPR001452 (PRINTS); IPR001452 (PFAM); IPR027267 (G3DSA:1.20.1270.GENE3D); G3DSA:2.30.30.40 (GENE3D); IPR018859 (PFAM); PTHR14167:SF50 (PANTHER); PTHR14167 (PANTHER); IPR001452 (PROSITE_PROFILES); IPR036028 (SUPERFAMILY); IPR027267 (SUPERFAMILY)	F:GO:0005515	F:protein binding
EV		DN10538_c0_g1_i1_29164	102	44224	4.66667	6	2	6	2	0.16		Annexin A7	TRUE	[INTERPRO, BLASTED, MAPPED, ANNOTATED]	347	20	0	79.06	2	F:GO:0005509; F:GO:0005544	F:calcium ion binding; F:calcium-dependent phospholipid binding			IPR001464 (PRINTS); IPR037104 (G3DSA:1.10.220.GENE3D); IPR037104 (G3DSA:1.10.220.GENE3D); IPR018502 (PFAM); IPR037104 (G3DSA:1.10.220.GENE3D); IPR037104 (G3DSA:1.10.220.GENE3D); PTHR10502 (PANTHER); IPR018252 (PROSITE_PATTERNS); IPR018502 (PROSITE_PROFILES); IPR018502 (PROSITE_PROFILES); IPR018502 (PROSITE_PROFILES); IPR018502 (PROSITE_PROFILES); IPR037104 (SUPERFAMILY)	F:GO:0005509; F:GO:0005544	F:calcium ion binding; F:calcium-dependent phospholipid binding
EV		DN10704_c1_g2_i4_35836	111	31685	4.66667	5	2	3	2	0.22	5	hypothetical protein EgrG_000663300	TRUE	[INTERPRO, BLASTED, MAPPED]	222	3	8.59632e-15	53.54	2	C:GO:0016020; C:GO:0016021	C:membrane; C:integral component of membrane			mobidb-lite (MOBIDB_LITE); mobidb-lite (MOBIDB_LITE); mobidb-lite (MOBIDB_LITE)	no GO terms	no GO terms
EV		DN10972_c0_g1_i1_50892	64	213524	4.66667	3	1	3	1	0.02		Chromodomain-helicase-DNA-binding protein	TRUE	[INTERPRO, BLASTED, MAPPED, ANNOTATED]	1643	20	0	60.39	2	F:GO:0097159; F:GO:1901363	F:organic cyclic compound binding; F:heterocyclic compound binding			Coil (COILS); IPR001650 (PFAM); IPR000330 (PFAM); IPR038718 (G3DSA:3.40.50.GENE3D); IPR009462 (PFAM); IPR012957 (PFAM); G3DSA:3.40.50.300 (GENE3D); mobidb-lite (MOBIDB_LITE); mobidb-lite (MOBIDB_LITE); mobidb-lite (MOBIDB_LITE); mobidb-lite (MOBIDB_LITE); mobidb-lite (MOBIDB_LITE); mobidb-lite (MOBIDB_LITE); mobidb-lite (MOBIDB_LITE); PTHR45623 (PANTHER); IPR014001 (PROSITE_PROFILES); IPR001650 (…	F:GO:0005524	F:ATP binding
EV		DN11098_c0_g2_i1_52906	151	14960	4.66667	6	5	4	3	1.78	3	lung cancer oncogene 5	TRUE	[INTERPRO, BLASTED, MAPPED, ANNOTATED]	129	12	1.33796e-15	63.18	1	C:GO:0005856	C:cytoskeleton			PTHR11886:SF93 (PANTHER); IPR001372 (PANTHER)	P:GO:0007017; C:GO:0030286	P:microtubule-based process; C:dynein complex
EV		DN3788_c0_g1_i1_50567	62	15303	4.66667	6	3	4	2	0.82		Uncharacterised
EV		DN4276_c0_g1_i2_44818	77	33979	4.66667	4	2	4	2	0.2		Uncharacterised
EV		DN5505_c0_g1_i1_10479	156	73031	4.66667	10	5	9	4	0.25		oxalate:formate antiporter	TRUE	[INTERPRO, BLASTED, MAPPED, ANNOTATED]	471	20	0	78.94	3	P:GO:0055085; F:GO:0022857; C:GO:0016021	P:transmembrane transport; F:transmembrane transporter activity; C:integral component of membrane			G3DSA:1.20.1250.20 (GENE3D); IPR011701 (PFAM); PTHR11360 (PANTHER); PTHR11360:SF3 (PANTHER); IPR020846 (PROSITE_PROFILES); cd17353 (CDD); IPR036259 (SUPERFAMILY)	P:GO:0055085; F:GO:0022857	P:transmembrane transport; F:transmembrane transporter activity
EV		DN6054_c0_g1_i2_17812	88	70997	4.66667	8	2	6	2	0.09		6-phosphogluconate dehydrogenase, decarboxylating	TRUE	[INTERPRO, BLASTED, MAPPED, ANNOTATED]	215	20	5.41077e-108	76.77	5	P:GO:0009051; P:GO:0046177; F:GO:0004616; F:GO:0050661; C:GO:0005829	P:pentose-phosphate shunt, oxidative branch; P:D-gluconate catabolic process; F:phosphogluconate dehydrogenase (decarboxylating) activity; F:NADP binding; C:cytosol	EC:1.1.1.44	Phosphogluconate dehydrogenase (NADP(+)-dependent, decarboxylating)	IPR006183 (PRINTS); G3DSA:3.40.50.720 (GENE3D); IPR006114 (PFAM); IPR013328 (G3DSA:1.10.1040.GENE3D); PTHR11811:SF50 (PANTHER); IPR006183 (PANTHER); IPR006184 (PROSITE_PATTERNS); IPR008927 (SUPERFAMILY)	P:GO:0006098; P:GO:0055114; F:GO:0004616; F:GO:0016491	P:pentose-phosphate shunt; P:oxidation-reduction process; F:phosphogluconate dehydrogenase (decarboxylating) activity; F:oxidoreductase activity
EV		DN7236_c0_g1_i2_8180	166	48564	4.66667	7	4	6	4	0.3		Arp2/3 complex 34 kDa subunit	TRUE	[INTERPRO, BLASTED, MAPPED, ANNOTATED]	334	20	0	79.38	4	P:GO:0034314; F:GO:0003779; C:GO:0005737; C:GO:0005885	P:Arp2/3 complex-mediated actin nucleation; F:actin binding; C:cytoplasm; C:Arp2/3 protein complex			IPR034666 (G3DSA:3.30.1460.GENE3D); IPR007188 (PFAM); IPR034666 (G3DSA:3.30.1460.GENE3D); PTHR12058:SF0 (PANTHER); IPR007188 (PANTHER); IPR034666 (SUPERFAMILY); IPR034666 (SUPERFAMILY)	P:GO:0030041; P:GO:0030833; P:GO:0034314; C:GO:0005885; C:GO:0015629	P:actin filament polymerization; P:regulation of actin filament polymerization; P:Arp2/3 complex-mediated actin nucleation; C:Arp2/3 protein complex; C:actin cytoskeleton
EV		DN9960_c0_g2_i1_53801	74	52322	4.66667	6	3	4	3	0.2	2	expressed conserved protein	TRUE	[INTERPRO, BLASTED]	392	9	3.48393e-16	48.39						IPR043792 (PFAM); mobidb-lite (MOBIDB_LITE); mobidb-lite (MOBIDB_LITE); mobidb-lite (MOBIDB_LITE); mobidb-lite (MOBIDB_LITE); mobidb-lite (MOBIDB_LITE); mobidb-lite (MOBIDB_LITE); mobidb-lite (MOBIDB_LITE); mobidb-lite (MOBIDB_LITE); mobidb-lite (MOBIDB_LITE)	no GO terms	no GO terms
EV		DN10070_c0_g1_i2_2060	160	51032	4.33333	9	4	7	4	0.28	6	actin protein 3B	TRUE	[INTERPRO, BLASTED, MAPPED, ANNOTATED]	364	20	0	92.34	3	P:GO:0034314; F:GO:0005524; C:GO:0005885	P:Arp2/3 complex-mediated actin nucleation; F:ATP binding; C:Arp2/3 protein complex			G3DSA:3.30.420.40 (GENE3D); IPR004000 (PFAM); G3DSA:3.90.640.10 (GENE3D); G3DSA:3.30.420.40 (GENE3D); IPR015623 (PTHR11937:PANTHER); IPR004000 (PANTHER); IPR020902 (PROSITE_PATTERNS); cd00012 (CDD); IPR043129 (SUPERFAMILY); IPR043129 (SUPERFAMILY)	P:GO:0007015; P:GO:0034314; F:GO:0005524; C:GO:0005885	P:actin filament organization; P:Arp2/3 complex-mediated actin nucleation; F:ATP binding; C:Arp2/3 protein complex
EV	Immunomodulators	DN11064_c0_g2_i2_53099	72	23123	4.33333	7	2	7	2	0.31		hypothetical transcript	TRUE	[INTERPRO, BLASTED, MAPPED, ANNOTATED]	116	20	1.98774e-41	75.79	5	P:GO:0006662; P:GO:0045454; P:GO:0055114; F:GO:0015035; C:GO:0043229	P:glycerol ether metabolic process; P:cell redox homeostasis; P:oxidation-reduction process; F:protein disulfide oxidoreductase activity; C:intracellular organelle			PR00421 (PRINTS); IPR036249 (G3DSA:3.40.30.GENE3D); IPR013766 (PFAM); IPR005746 (TIGRFAM); PTHR46115:SF1 (PANTHER); PTHR46115 (PANTHER); IPR013766 (PROSITE_PROFILES); cd02947 (CDD); IPR036249 (SUPERFAMILY)	P:GO:0006662; P:GO:0045454; F:GO:0015035	P:glycerol ether metabolic process; P:cell redox homeostasis; F:protein disulfide oxidoreductase activity
EV		DN11657_c0_g1_i1_42989	104	62424	4.33333	5	2	4	2	0.11		hypothetical transcript	TRUE	[INTERPRO, BLASTED, MAPPED, ANNOTATED]	530	20	2.0257e-41	47.83	1	C:GO:0110165	C:cellular anatomical entity			IPR013783 (G3DSA:2.60.40.GENE3D); IPR013783 (G3DSA:2.60.40.GENE3D); IPR003961 (PFAM); IPR003961 (PROSITE_PROFILES); IPR003961 (PROSITE_PROFILES); IPR003961 (PROSITE_PROFILES); IPR003961 (PROSITE_PROFILES); IPR003961 (PROSITE_PROFILES); IPR036116 (SUPERFAMILY); IPR036116 (SUPERFAMILY); IPR036116 (SUPERFAMILY)	F:GO:0005515	F:protein binding
EV		DN11676_c0_g1_i1_42896	184	61498	4.33333	7	3	6	2	0.17		Excitatory amino acid transporter	TRUE	[INTERPRO, BLASTED, MAPPED, ANNOTATED]	483	20	0	77.04	3	P:GO:0055085; F:GO:0015293; C:GO:0016021	P:transmembrane transport; F:symporter activity; C:integral component of membrane			PR00173 (PRINTS); IPR001991 (PFAM); IPR036458 (G3DSA:1.10.3860.GENE3D); PTHR11958 (PANTHER); IPR036458 (SUPERFAMILY)	F:GO:0015293; C:GO:0016021	F:symporter activity; C:integral component of membrane
EV		DN11676_c0_g2_i1_67956	96	70211	4.33333	5	5	4	4	0.2	6	unnamed protein product	TRUE	[INTERPRO, BLASTED]	565	20	0	66.17						IPR035892 (G3DSA:2.60.40.GENE3D); IPR000008 (PFAM); IPR035892 (G3DSA:2.60.40.GENE3D); mobidb-lite (MOBIDB_LITE); mobidb-lite (MOBIDB_LITE); mobidb-lite (MOBIDB_LITE); mobidb-lite (MOBIDB_LITE); mobidb-lite (MOBIDB_LITE); IPR043541 (PANTHER); PS51257 (PROSITE_PROFILES); SSF49562 (SUPERFAMILY); SSF49562 (SUPERFAMILY)	no GO terms	no GO terms
EV		DN11948_c3_g1_i5_58176	279	35670	4.33333	6	4	5	3	0.43		multidrug resistance protein 1	TRUE	[INTERPRO, BLASTED, MAPPED, ANNOTATED]	213	20	1.02089e-128	86.14	6	P:GO:0015721; P:GO:0055085; F:GO:0005524; F:GO:0016887; F:GO:0042626; C:GO:0016021	P:bile acid and bile salt transport; P:transmembrane transport; F:ATP binding; F:ATPase activity; F:ATPase-coupled transmembrane transporter activity; C:integral component of membrane	EC:3.6.1.3; EC:3.6.1.15	Adenosinetriphosphatase; Nucleoside-triphosphate phosphatase	IPR003439 (PFAM); G3DSA:3.40.50.300 (GENE3D); IPR039421 (PANTHER); PTHR24221:SF501 (PANTHER); IPR017871 (PROSITE_PATTERNS); IPR003439 (PROSITE_PROFILES); IPR027417 (SUPERFAMILY)	F:GO:0005524; F:GO:0016887	F:ATP binding; F:ATPase activity
EV		DN4508_c0_g1_i1_29941	96	29382	4.33333	10	7	9	7	1.12	3	putative arp2/3 complex 21 kD subunit	TRUE	[INTERPRO, BLASTED, MAPPED, ANNOTATED]	195	20	1.21464e-117	86.53	4	P:GO:0034314; F:GO:0003779; C:GO:0005737; C:GO:0005885	P:Arp2/3 complex-mediated actin nucleation; F:actin binding; C:cytoplasm; C:Arp2/3 protein complex			IPR007204 (PFAM); IPR007204 (PIRSF); IPR036753 (G3DSA:1.10.1760.GENE3D); IPR007204 (PANTHER); IPR036753 (SUPERFAMILY)	P:GO:0030833; P:GO:0034314; C:GO:0005856; C:GO:0005885	P:regulation of actin filament polymerization; P:Arp2/3 complex-mediated actin nucleation; C:cytoskeleton; C:Arp2/3 protein complex
EV		DN4676_c0_g1_i1_76672	92	29965	4.33333	3	3	3	3	0.37	3	tegumental protein	TRUE	[INTERPRO, BLASTED, MAPPED, ANNOTATED]	189	20	9.92958e-112	73.3	2	F:GO:0005509; C:GO:0016020	F:calcium ion binding; C:membrane			G3DSA:1.10.238.10 (GENE3D); IPR018247 (PROSITE_PATTERNS); IPR011992 (SUPERFAMILY)	no GO terms	no GO terms
EV		DN6144_c0_g1_i1_49576	80	24009	4.33333	3	3	3	3	0.48	3	Dynein light chain type 1 2	TRUE	[INTERPRO, BLASTED, MAPPED, ANNOTATED]	101	20	1.49106e-53	69.75	5	P:GO:0007017; F:GO:0003774; C:GO:0005737; C:GO:0005874; C:GO:0030286	P:microtubule-based process; F:motor activity; C:cytoplasm; C:microtubule; C:dynein complex	EC:3.6.1.15	Nucleoside-triphosphate phosphatase	IPR037177 (G3DSA:3.30.740.GENE3D); IPR001372 (PFAM); IPR037177 (SUPERFAMILY)	P:GO:0007017; C:GO:0030286	P:microtubule-based process; C:dynein complex
EV		DN6261_c0_g1_i1_15045	85	44868	4.33333	5	3	5	3	0.24	1	alpha tocopherol transfer protein	TRUE	[INTERPRO, BLASTED]	348	20	0	68.13						IPR036865 (G3DSA:3.40.525.GENE3D); IPR001251 (PFAM); G3DSA:1.10.8.20 (GENE3D); PTHR10174 (PANTHER); IPR001251 (PROSITE_PROFILES); IPR001251 (CDD); IPR036865 (SUPERFAMILY); IPR036273 (SUPERFAMILY)	no GO terms	no GO terms
EV		DN6772_c0_g1_i3_62795	84	38480	4.33333	9	4	6	4	0.39		syntaxin 1a	TRUE	[INTERPRO, BLASTED, MAPPED, ANNOTATED]	293	20	1.42364e-150	81.54	6	P:GO:0006886; P:GO:0017157; P:GO:0061025; F:GO:0000149; F:GO:0005484; C:GO:0016021	P:intracellular protein transport; P:regulation of exocytosis; P:membrane fusion; F:SNARE binding; F:SNAP receptor activity; C:integral component of membrane			Coil (COILS); G3DSA:1.20.5.110 (GENE3D); IPR006011 (PFAM); IPR000727 (PFAM); G3DSA:1.20.58.70 (GENE3D); PTHR19957 (PANTHER); PTHR19957:SF231 (PANTHER); IPR006012 (PROSITE_PATTERNS); IPR000727 (PROSITE_PROFILES); IPR006011 (CDD); cd15848 (CDD); IPR010989 (SUPERFAMILY)	P:GO:0006886; P:GO:0016192; F:GO:0005484; C:GO:0016020	P:intracellular protein transport; P:vesicle-mediated transport; F:SNAP receptor activity; C:membrane
EV		DN7526_c0_g1_i1_37162	55	64874	4.33333	9	3	8	3	0.16		alkaline phosphatase	TRUE	[INTERPRO, BLASTED, MAPPED, ANNOTATED]	539	20	0	74.61	2	P:GO:0016311; F:GO:0004035	P:dephosphorylation; F:alkaline phosphatase activity	EC:3.1.3.1	Alkaline phosphatase	IPR001952 (PRINTS); IPR001952 (PFAM); IPR017850 (G3DSA:3.40.720.GENE3D); IPR001952 (PANTHER); IPR018299 (PROSITE_PATTERNS); IPR001952 (CDD); IPR017850 (SUPERFAMILY)	F:GO:0003824; F:GO:0016791	F:catalytic activity; F:phosphatase activity
EV		DN7945_c0_g1_i3_57636	179	54452	4.33333	9	7	9	7	0.51	3	adenylosuccinate synthetase	TRUE	[INTERPRO, BLASTED, MAPPED, ANNOTATED]	361	20	0	83.65	5	P:GO:0044208; F:GO:0000287; F:GO:0004019; F:GO:0005525; C:GO:0005737	P:'de novo' AMP biosynthetic process; F:magnesium ion binding; F:adenylosuccinate synthase activity; F:GTP binding; C:cytoplasm	EC:6.3.4.4	Adenylosuccinate synthase	IPR042110 (G3DSA:1.10.300.GENE3D); IPR042109 (G3DSA:3.40.440.GENE3D); IPR001114 (PFAM); IPR042111 (G3DSA:3.90.170.GENE3D); IPR001114 (TIGRFAM); IPR001114 (PANTHER); IPR018220 (PROSITE_PATTERNS); IPR033128 (PROSITE_PATTERNS); IPR001114 (HAMAP); IPR001114 (CDD); IPR027417 (SUPERFAMILY)	P:GO:0006164; F:GO:0004019; F:GO:0005525	P:purine nucleotide biosynthetic process; F:adenylosuccinate synthase activity; F:GTP binding
EV		DN9134_c0_g1_i1_19673	421	38231	4.33333	10	9	8	7	1.11	3	programmed cell death protein 6	TRUE	[INTERPRO, BLASTED, MAPPED, ANNOTATED]	174	20	8.21011e-101	77.67	1	F:GO:0005509	F:calcium ion binding			IPR002048 (PFAM); IPR002048 (PFAM); G3DSA:1.10.238.10 (GENE3D); IPR002048 (PFAM); PTHR46212 (PANTHER); PTHR46212:SF4 (PANTHER); IPR018247 (PROSITE_PATTERNS); IPR018247 (PROSITE_PATTERNS); IPR002048 (PROSITE_PROFILES); IPR002048 (PROSITE_PROFILES); IPR002048 (PROSITE_PROFILES); IPR002048 (PROSITE_PROFILES); cd16180 (CDD); IPR011992 (SUPERFAMILY)	F:GO:0005509	F:calcium ion binding
EV		DN9526_c1_g1_i2_26725	133	53815	4.33333	10	2	7	2	0.13		expressed conserved protein	TRUE	[INTERPRO, BLASTED]	430	20	1.0376e-51	55.53						Coil (COILS); mobidb-lite (MOBIDB_LITE); mobidb-lite (MOBIDB_LITE); mobidb-lite (MOBIDB_LITE); mobidb-lite (MOBIDB_LITE); mobidb-lite (MOBIDB_LITE)	no GO terms	no GO terms
EV		DN10418_c0_g1_i2_8844	80	49167	4	8	4	8	4	0.3		alpha tocopherol transfer protein	TRUE	[INTERPRO, BLASTED]	246	20	4.49748e-126	78.29						G3DSA:1.10.8.20 (GENE3D); IPR001251 (PFAM); IPR036865 (G3DSA:3.40.525.GENE3D); PTHR10174 (PANTHER); IPR001251 (CDD); IPR036273 (SUPERFAMILY); IPR036865 (SUPERFAMILY)	no GO terms	no GO terms
EV		DN10568_c0_g1_i8_29200	75	9448	4	6	3	1	1	0.87	6	Uncharacterised
EV		DN10836_c0_g1_i6_11679	91	49433	4	6	3	6	3	0.21		solute carrier family 5	TRUE	[INTERPRO, BLASTED, MAPPED, ANNOTATED]	389	20	0	79.48	3	P:GO:0055085; F:GO:0022857; C:GO:0016021	P:transmembrane transport; F:transmembrane transporter activity; C:integral component of membrane			IPR038377 (G3DSA:1.20.1730.GENE3D); IPR001734 (TIGRFAM); IPR001734 (PFAM); PTHR11819 (PANTHER); IPR018212 (PROSITE_PATTERNS); IPR001734 (PROSITE_PROFILES)	P:GO:0055085; F:GO:0022857; C:GO:0016020	P:transmembrane transport; F:transmembrane transporter activity; C:membrane
EV		DN11320_c0_g1_i15_13678	103	33213	4	7	3	5	3	0.33	5	No hit	TRUE	[INTERPRO, NO-BLAST]	113									mobidb-lite (MOBIDB_LITE); mobidb-lite (MOBIDB_LITE)	no GO terms	no GO terms
EV		DN11532_c0_g2_i7_62128	82	70523	4	8	3	7	2	0.1		expressed conserved protein	TRUE	[INTERPRO, BLASTED]	486	17	6.18767e-69	43.25						mobidb-lite (MOBIDB_LITE); mobidb-lite (MOBIDB_LITE)	no GO terms	no GO terms
EV		DN12158_c0_g2_i2_41455	62	97616	4	4	1	4	1	0.03		protein transport protein sec24c	TRUE	[INTERPRO, BLASTED, MAPPED, ANNOTATED]	602	20	0	78.17	4	P:GO:0006886; P:GO:0006888; F:GO:0008270; C:GO:0030127	P:intracellular protein transport; P:endoplasmic reticulum to Golgi vesicle-mediated transport; F:zinc ion binding; C:COPII vesicle coat			IPR007123 (PFAM); G3DSA:1.20.120.730 (GENE3D); IPR012990 (PFAM); IPR036465 (G3DSA:3.40.50.GENE3D); IPR006896 (PFAM); IPR029006 (G3DSA:3.40.20.GENE3D); IPR006900 (PFAM); PTHR13803:SF5 (PANTHER); PTHR13803 (PANTHER); IPR036180 (SUPERFAMILY); IPR036175 (SUPERFAMILY); IPR036465 (SUPERFAMILY); SSF81995 (SUPERFAMILY)	P:GO:0006886; P:GO:0006888; C:GO:0030127	P:intracellular protein transport; P:endoplasmic reticulum to Golgi vesicle-mediated transport; C:COPII vesicle coat
EV		DN4718_c0_g1_i1_46511	99	34979	4	5	3	5	3	0.31	1	pdz domain containing protein	TRUE	[INTERPRO, BLASTED]	160	20	1.07797e-76	69.43						IPR001478 (PFAM); IPR036034 (G3DSA:2.30.42.GENE3D); PTHR14191:SF22 (PANTHER); PTHR14191 (PANTHER); IPR001478 (PROSITE_PROFILES); cd00992 (CDD); IPR036034 (SUPERFAMILY)	F:GO:0005515	F:protein binding
EV		DN6509_c0_g1_i1_2456	56	51912	4	5	1	4	1	0.06	6	putative rabb and C	TRUE	[INTERPRO, BLASTED, MAPPED, ANNOTATED]	279	20	2.42081e-167	79.12	2	F:GO:0003924; F:GO:0005525	F:GTPase activity; F:GTP binding	EC:3.6.1.15	Nucleoside-triphosphate phosphatase	PR00449 (PRINTS); IPR001806 (PFAM); IPR005225 (TIGRFAM); G3DSA:3.40.50.300 (GENE3D); mobidb-lite (MOBIDB_LITE); mobidb-lite (MOBIDB_LITE); mobidb-lite (MOBIDB_LITE); PTHR47977:SF51 (PANTHER); PTHR47977 (PANTHER); IPR025662 (PROSITE_PATTERNS); PS51419 (PROSITE_PROFILES); cd00154 (CDD); IPR027417 (SUPERFAMILY)	F:GO:0003924; F:GO:0005525	F:GTPase activity; F:GTP binding
EV		DN7545_c0_g1_i1_75976	60	52372	4	4	3	3	2	0.13		dnaJ subfamily A	TRUE	[INTERPRO, BLASTED, MAPPED, ANNOTATED]	397	20	0	80.15	6	P:GO:0006457; P:GO:0009408; F:GO:0005524; F:GO:0031072; F:GO:0046872; F:GO:0051082	P:protein folding; P:response to heat; F:ATP binding; F:heat shock protein binding; F:metal ion binding; F:unfolded protein binding			IPR001623 (PRINTS); IPR001305 (PFAM); G3DSA:2.10.230.10 (GENE3D); G3DSA:2.60.260.20 (GENE3D); IPR001623 (PFAM); IPR036869 (G3DSA:1.10.287.GENE3D); IPR002939 (PFAM); mobidb-lite (MOBIDB_LITE); mobidb-lite (MOBIDB_LITE); PTHR43888 (PANTHER); PTHR43888:SF9 (PANTHER); IPR018253 (PROSITE_PATTERNS); IPR001305 (PROSITE_PROFILES); IPR012724 (HAMAP); IPR001623 (PROSITE_PROFILES); IPR001623 (CDD); cd10747 …	P:GO:0006457; P:GO:0009408; F:GO:0005524; F:GO:0031072; F:GO:0051082	P:protein folding; P:response to heat; F:ATP binding; F:heat shock protein binding; F:unfolded protein binding
EV		DN9056_c0_g1_i5_35630	57	44936	4	6	1	4	1	0.07		Uncharacterised
EV		DN9330_c0_g1_i1_76124	121	63715	4	8	4	7	4	0.22		expressed protein	TRUE	[INTERPRO, BLASTED]	366	14	7.82771e-156	70.84						mobidb-lite (MOBIDB_LITE); mobidb-lite (MOBIDB_LITE); mobidb-lite (MOBIDB_LITE); mobidb-lite (MOBIDB_LITE); mobidb-lite (MOBIDB_LITE); mobidb-lite (MOBIDB_LITE); mobidb-lite (MOBIDB_LITE)	no GO terms	no GO terms
EV		DN10034_c0_g1_i1_51978	122	61596	3.66667	6	2	6	2	0.11		MFS transporter ceroid lipofuscinosis neuronal	TRUE	[INTERPRO, BLASTED, MAPPED, ANNOTATED]	477	20	0	74.92	3	P:GO:1902476; F:GO:0005247; C:GO:0016021	P:chloride transmembrane transport; F:voltage-gated chloride channel activity; C:integral component of membrane			IPR011701 (PFAM); G3DSA:1.20.1250.20 (GENE3D); PTHR23510:SF16 (PANTHER); PTHR23510:SF16 (PANTHER); PTHR23510 (PANTHER); IPR020846 (PROSITE_PROFILES); cd17326 (CDD); IPR036259 (SUPERFAMILY)	P:GO:0055085; F:GO:0022857	P:transmembrane transport; F:transmembrane transporter activity
EV		DN10084_c0_g1_i2_51945	152	63833	3.66667	7	5	7	5	0.29		sodium driven chloride bicarbonate exchanger	TRUE	[INTERPRO, BLASTED, MAPPED, ANNOTATED]	601	20	0	67.84	4	P:GO:0015698; P:GO:0098656; F:GO:0005452; C:GO:0016021	P:inorganic anion transport; P:anion transmembrane transport; F:inorganic anion exchanger activity; C:integral component of membrane			IPR011531 (PFAM); G3DSA:1.10.287.570 (GENE3D); IPR013769 (PFAM); IPR016152 (G3DSA:3.40.930.GENE3D); mobidb-lite (MOBIDB_LITE); mobidb-lite (MOBIDB_LITE); mobidb-lite (MOBIDB_LITE); mobidb-lite (MOBIDB_LITE); mobidb-lite (MOBIDB_LITE); mobidb-lite (MOBIDB_LITE); mobidb-lite (MOBIDB_LITE); IPR003020 (PANTHER); PTHR11453:SF36 (PANTHER); IPR003020 (PANTHER); IPR016152 (SUPERFAMILY)	P:GO:0006820; F:GO:0005452; F:GO:0008509; C:GO:0016020; C:GO:0016021	P:anion transport; F:inorganic anion exchanger activity; F:anion transmembrane transporter activity; C:membrane; C:integral component of membrane
EV		DN10221_c0_g1_i1_65390	256	53501	3.66667	9	7	9	7	0.52	6	Fructose-bisphosphate aldolase	TRUE	[INTERPRO, BLASTED, MAPPED, ANNOTATED]	374	20	0	91.34	2	P:GO:0006096; F:GO:0004332	P:glycolytic process; F:fructose-bisphosphate aldolase activity	EC:4.1.2.13	Fructose-bisphosphate aldolase	IPR013785 (G3DSA:3.20.20.GENE3D); IPR000741 (PFAM); PTHR11627 (PANTHER); IPR029768 (PROSITE_PATTERNS); cd00948 (CDD); SSF51569 (SUPERFAMILY)	P:GO:0006096; F:GO:0003824; F:GO:0004332	P:glycolytic process; F:catalytic activity; F:fructose-bisphosphate aldolase activity
EV		DN11192_c0_g1_i7_24011	91	79451	3.66667	5	2	5	2	0.08		hypothetical transcript	TRUE	[INTERPRO, BLASTED, MAPPED, ANNOTATED]	586	20	9.0512e-34	47.54	1	C:GO:0110165	C:cellular anatomical entity			IPR003961 (PFAM); IPR013783 (G3DSA:2.60.40.GENE3D); IPR013783 (G3DSA:2.60.40.GENE3D); mobidb-lite (MOBIDB_LITE); PTHR46708 (PANTHER); IPR003961 (PROSITE_PROFILES); IPR003961 (PROSITE_PROFILES); IPR003961 (PROSITE_PROFILES); IPR003961 (PROSITE_PROFILES); IPR003961 (CDD); IPR003961 (CDD); IPR036116 (SUPERFAMILY); IPR036116 (SUPERFAMILY); IPR036116 (SUPERFAMILY)	F:GO:0005515	F:protein binding
EV		DN11780_c0_g1_i1_60951	93	49901	3.66667	6	4	5	4	0.29		expressed conserved protein	TRUE	[INTERPRO, BLASTED]	363	12	3.45817e-28	49.99						Coil (COILS); IPR043792 (PFAM); mobidb-lite (MOBIDB_LITE); mobidb-lite (MOBIDB_LITE); mobidb-lite (MOBIDB_LITE); mobidb-lite (MOBIDB_LITE); mobidb-lite (MOBIDB_LITE); mobidb-lite (MOBIDB_LITE)	no GO terms	no GO terms
EV		DN1464_c0_g1_i1_44183	109	32545	3.66667	5	5	5	5	0.63		Uncharacterised
EV		DN1715_c0_g1_i1_4051	84	21983	3.66667	4	3	3	2	0.53	5	peptidylprolyl isomerase	TRUE	[INTERPRO, BLASTED, MAPPED, ANNOTATED]	166	20	6.53312e-94	85.47	5	P:GO:0000413; P:GO:0006457; F:GO:0003755; C:GO:0005737; C:GO:0016021	P:protein peptidyl-prolyl isomerization; P:protein folding; F:peptidyl-prolyl cis-trans isomerase activity; C:cytoplasm; C:integral component of membrane	EC:5.2.1.8	Peptidylprolyl isomerase	IPR002130 (PRINTS); IPR024936 (PIRSF); IPR029000 (G3DSA:2.40.100.GENE3D); IPR002130 (PFAM); PTHR11071 (PANTHER); PTHR11071:SF503 (PANTHER); IPR020892 (PROSITE_PATTERNS); IPR002130 (PROSITE_PROFILES); cd01926 (CDD); IPR029000 (SUPERFAMILY)	P:GO:0000413; P:GO:0006457; F:GO:0003755	P:protein peptidyl-prolyl isomerization; P:protein folding; F:peptidyl-prolyl cis-trans isomerase activity
EV		DN5742_c0_g1_i3_28667	69	44928	3.66667	9	2	7	2	0.15		sorbin	TRUE	[INTERPRO, BLASTED]	272	20	2.62946e-45	61.65						G3DSA:2.30.30.40 (GENE3D); IPR001452 (PFAM); mobidb-lite (MOBIDB_LITE); mobidb-lite (MOBIDB_LITE); mobidb-lite (MOBIDB_LITE); IPR001452 (PROSITE_PROFILES); cd00174 (CDD); IPR036028 (SUPERFAMILY)	F:GO:0005515	F:protein binding
EV		DN7817_c0_g1_i1_51569	111	38349	3.66667	6	4	4	3	0.39		expressed conserved protein	TRUE	[INTERPRO, BLASTED]	253	20	5.54595e-32	59.01						Coil (COILS); Coil (COILS); mobidb-lite (MOBIDB_LITE); mobidb-lite (MOBIDB_LITE); mobidb-lite (MOBIDB_LITE); mobidb-lite (MOBIDB_LITE)	no GO terms	no GO terms
EV		DN10542_c0_g1_i16_3393	105	18358	3.33333	3	2	3	2	0.4	5	unnamed protein product, partial	TRUE	[INTERPRO, BLASTED, MAPPED]	170	2	5.12766e-07	49.46	2	C:GO:0016020; C:GO:0016021	C:membrane; C:integral component of membrane			mobidb-lite (MOBIDB_LITE); mobidb-lite (MOBIDB_LITE); mobidb-lite (MOBIDB_LITE)	no GO terms	no GO terms
EV		DN11109_c0_g1_i2_24127	52	20332	3.33333	4	1	3	1	0.17		Uncharacterised
EV		DN11759_c0_g2_i9_61188	84	96123	3.33333	8	2	4	2	0.07		microtubule actin cross linking factor 1	TRUE	[INTERPRO, BLASTED, MAPPED]	827	20	0	61.85	4	P:GO:0045104; P:GO:0098609; F:GO:0050839; C:GO:0030054	P:intermediate filament cytoskeleton organization; P:cell-cell adhesion; F:cell adhesion molecule binding; C:cell junction			mobidb-lite (MOBIDB_LITE); mobidb-lite (MOBIDB_LITE); mobidb-lite (MOBIDB_LITE)	no GO terms	no GO terms
EV		DN5019_c0_g1_i1_184	68	24850	3.33333	3	1	3	1	0.13	3	Nucleoside diphosphate kinase	TRUE	[INTERPRO, BLASTED, MAPPED, ANNOTATED]	157	20	1.43407e-98	87.53	7	P:GO:0006165; P:GO:0006183; P:GO:0006228; P:GO:0006241; F:GO:0004550; F:GO:0005524; F:GO:0046872	P:nucleoside diphosphate phosphorylation; P:GTP biosynthetic process; P:UTP biosynthetic process; P:CTP biosynthetic process; F:nucleoside diphosphate kinase activity; F:ATP binding; F:metal ion binding	EC:2.7.4.6	Nucleoside-diphosphate kinase	IPR001564 (PRINTS); IPR036850 (G3DSA:3.30.70.GENE3D); IPR034907 (PFAM); PTHR11349 (PANTHER); PTHR11349:SF91 (PANTHER); IPR023005 (PROSITE_PATTERNS); IPR001564 (HAMAP); cd04413 (CDD); IPR036850 (SUPERFAMILY)	P:GO:0006165; P:GO:0006183; P:GO:0006228; P:GO:0006241; F:GO:0004550	P:nucleoside diphosphate phosphorylation; P:GTP biosynthetic process; P:UTP biosynthetic process; P:CTP biosynthetic process; F:nucleoside diphosphate kinase activity
EV		DN7430_c0_g1_i1_2817	55	36479	3.33333	4	1	4	1	0.09	2	charged multivesicular body protein 1b	TRUE	[INTERPRO, BLASTED, MAPPED, ANNOTATED]	206	20	2.19966e-131	85.14	1	P:GO:0007034	P:vacuolar transport			Coil (COILS); IPR042277 (G3DSA:1.20.1260.GENE3D); IPR005024 (PFAM); mobidb-lite (MOBIDB_LITE); mobidb-lite (MOBIDB_LITE); PTHR10476:SF2 (PANTHER); PTHR10476 (PANTHER)	P:GO:0007034	P:vacuolar transport
EV		DN8032_c0_g1_i1_30654	73	45399	3.33333	4	3	4	3	0.23		Programmed cell death protein 10	TRUE	[INTERPRO, BLASTED, MAPPED]	223	20	8.88388e-132	72.47	2	C:GO:0016020; C:GO:0016021	C:membrane; C:integral component of membrane			G3DSA:1.20.120.1950 (GENE3D); PF06840 (PFAM); IPR009652 (PANTHER)	no GO terms	no GO terms
EV		DN8639_c0_g2_i2_25959	192	32444	3.33333	5	5	4	4	0.63	2	expressed conserved protein	TRUE	[INTERPRO, BLASTED, MAPPED]	244	20	6.43915e-84	66.3	2	C:GO:0016020; C:GO:0016021	C:membrane; C:integral component of membrane			mobidb-lite (MOBIDB_LITE); mobidb-lite (MOBIDB_LITE)	no GO terms	no GO terms
EV		DN8663_c0_g1_i1_64042	60	21190	3.33333	3	1	3	1	0.16		calcium-binding protein	TRUE	[INTERPRO, BLASTED, MAPPED, ANNOTATED]	140	20	4.34109e-77	81.24	1	F:GO:0005509	F:calcium ion binding			G3DSA:1.10.238.10 (GENE3D); IPR002048 (PFAM); G3DSA:1.10.238.10 (GENE3D); PTHR46212:SF3 (PANTHER); PTHR46212 (PANTHER); IPR018247 (PROSITE_PATTERNS); IPR018247 (PROSITE_PATTERNS); IPR002048 (PROSITE_PROFILES); IPR002048 (PROSITE_PROFILES); IPR002048 (PROSITE_PROFILES); IPR002048 (PROSITE_PROFILES); IPR002048 (CDD); IPR011992 (SUPERFAMILY)	F:GO:0005509	F:calcium ion binding
EV		DN9318_c0_g1_i2_24530	80	28306	3.33333	5	2	4	1	0.12		Uncharacterised
EV		DN9327_c0_g1_i1_37274	58	81336	3.33333	4	1	4	1	0.04		Receptor Mediated Endocytosis family member	TRUE	[INTERPRO, BLASTED, MAPPED, ANNOTATED]	561	20	0	86.42	3	P:GO:0032456; F:GO:0005509; F:GO:0005525	P:endocytic recycling; F:calcium ion binding; F:GTP binding			IPR000261 (PFAM); G3DSA:1.10.238.10 (GENE3D); IPR031692 (PFAM); IPR040990 (PFAM); G3DSA:1.10.268.20 (GENE3D); IPR022812 (PFAM); G3DSA:3.40.50.300 (GENE3D); PTHR11216:SF122 (PANTHER); PTHR11216 (PANTHER); IPR018247 (PROSITE_PATTERNS); IPR000261 (PROSITE_PROFILES); IPR030381 (PROSITE_PROFILES); IPR002048 (PROSITE_PROFILES); cd09913 (CDD); IPR000261 (CDD); IPR027417 (SUPERFAMILY); IPR011992 (SUPERFA…	F:GO:0005509; F:GO:0005515; F:GO:0005525	F:calcium ion binding; F:protein binding; F:GTP binding
EV		DN9433_c0_g1_i2_18543	59	15510	3.33333	5	1	4	1	0.22	3	Uncharacterised
EV		DN9550_c0_g1_i2_65275	76	35665	3.33333	6	1	5	1	0.09		ATP binding cassette subfamily B MDR:TAP	TRUE	[INTERPRO, BLASTED, MAPPED, ANNOTATED]	315	20	3.06776e-112	70.02	5	P:GO:0055085; F:GO:0005524; F:GO:0016887; F:GO:0042626; C:GO:0016021	P:transmembrane transport; F:ATP binding; F:ATPase activity; F:ATPase-coupled transmembrane transporter activity; C:integral component of membrane	EC:3.6.1.3; EC:3.6.1.15	Adenosinetriphosphatase; Nucleoside-triphosphate phosphatase	IPR011527 (PFAM); IPR036640 (G3DSA:1.20.1560.GENE3D); IPR030275 (PTHR24221:PANTHER); IPR039421 (PANTHER); IPR011527 (PROSITE_PROFILES); cd18577 (CDD); IPR036640 (SUPERFAMILY)	P:GO:0055085; F:GO:0005524; F:GO:0042626; C:GO:0016021	P:transmembrane transport; F:ATP binding; F:ATPase-coupled transmembrane transporter activity; C:integral component of membrane
EV		DN9811_c0_g1_i2_25025	69	45201	3.33333	6	2	6	2	0.15		sorbin	TRUE	[INTERPRO, BLASTED]	314	20	8.50361e-45	62.25						G3DSA:2.30.30.40 (GENE3D); IPR001452 (PFAM); mobidb-lite (MOBIDB_LITE); mobidb-lite (MOBIDB_LITE); mobidb-lite (MOBIDB_LITE); IPR001452 (PROSITE_PROFILES); cd00174 (CDD); IPR036028 (SUPERFAMILY)	F:GO:0005515	F:protein binding
EV	Immunomodulators	DN10610_c6_g1_i11_20270	106	62664	3	6	3	6	3	0.17		glycoprotein Antigen 5	TRUE	[INTERPRO, BLASTED, MAPPED, ANNOTATED]	333	20	3.92833e-170	67.99	3	P:GO:0006383; P:GO:0006508; F:GO:0004252	P:transcription by RNA polymerase III; P:proteolysis; F:serine-type endopeptidase activity	EC:3.4.21.73; EC:3.4.24.7; EC:3.4.21.71; EC:3.4.24.3; EC:3.4.21.34; EC:3.4.21.78; EC:3.4.21.75; EC:3.4.21.26; EC:3.4.21.27; EC:3.4.21.68; EC:3.4.21.69; EC:3.4.24.34; EC:3.4.21.41; EC:3.4.21.83; EC:3.4.21.88; EC:3.4.21.45; EC:3.4.21.89; EC:3.4.21.42; EC:3.4.19.1; EC:3.4.21.43; EC:3.4.21.87; EC:3.4.21.38; EC:3.4.21.35; EC:3.4.21.79; EC:3.4.21.36; EC:3.4.21.102; EC:3.4.21.39; EC:3.4.21; EC:3.4.21.4;…	U-plasminogen activator; Interstitial collagenase; Pancreatic elastase II; Microbial collagenase; Plasma kallikrein; Granzyme A; Furin; Prolyl oligopeptidase; Coagulation factor XIa; T-plasminogen activator; Protein C (activated); Neutrophil collagenase; Complement subcomponent C1r; Oligopeptidase B; Repressor LexA; Complement factor I; Signal peptidase I; Complement subcomponent C1s; Acylaminoac…	Coil (COILS); IPR001314 (PRINTS); IPR001254 (PFAM); IPR043504 (G3DSA:2.40.10.GENE3D); mobidb-lite (MOBIDB_LITE); PTHR24260 (PANTHER); IPR018114 (PROSITE_PATTERNS); IPR001254 (PROSITE_PROFILES); IPR009003 (SUPERFAMILY)	P:GO:0006508; F:GO:0004252	P:proteolysis; F:serine-type endopeptidase activity
EV		DN10702_c1_g1_i7_35861	130	78199	3	6	3	6	3	0.13		ATP binding cassette subfamily B MDR:TAP	TRUE	[INTERPRO, BLASTED, MAPPED, ANNOTATED]	302	20	2.86858e-140	70.31	5	P:GO:0055085; F:GO:0005524; F:GO:0016887; F:GO:0042626; C:GO:0016021	P:transmembrane transport; F:ATP binding; F:ATPase activity; F:ATPase-coupled transmembrane transporter activity; C:integral component of membrane	EC:3.6.1.3; EC:3.6.1.15	Adenosinetriphosphatase; Nucleoside-triphosphate phosphatase	IPR036640 (G3DSA:1.20.1560.GENE3D); IPR003439 (PFAM); IPR011527 (PFAM); IPR036640 (G3DSA:1.20.1560.GENE3D); G3DSA:3.40.50.300 (GENE3D); IPR039421 (PANTHER); PTHR24221:SF501 (PANTHER); IPR011527 (PROSITE_PROFILES); cd18578 (CDD); IPR027417 (SUPERFAMILY); IPR036640 (SUPERFAMILY)	P:GO:0055085; F:GO:0005524; F:GO:0042626; C:GO:0016021	P:transmembrane transport; F:ATP binding; F:ATPase-coupled transmembrane transporter activity; C:integral component of membrane
EV		DN11376_c0_g1_i6_13803	71	123651	3	6	1	6	1	0.03		Leucine-rich repeat-containing protein	TRUE	[INTERPRO, BLASTED, MAPPED]	855	17	0	57.92	2	F:GO:0000166; F:GO:0005524	F:nucleotide binding; F:ATP binding			IPR032675 (G3DSA:3.80.10.GENE3D); SSF52047 (SUPERFAMILY)	no GO terms	no GO terms
EV		DN11704_c0_g1_i1_48025	57	206398	3	6	1	6	1	0.04		protein kinase c eta type	TRUE	[INTERPRO, BLASTED, MAPPED, ANNOTATED]	601	20	1.61572e-158	83.18	7	P:GO:0006468; P:GO:0035556; F:GO:0004674; F:GO:0005089; F:GO:0005524; F:GO:0046872; C:GO:0005737	P:protein phosphorylation; P:intracellular signal transduction; F:protein serine/threonine kinase activity; F:Rho guanyl-nucleotide exchange factor activity; F:ATP binding; F:metal ion binding; C:cytoplasm	EC:2.7.11	Transferring phosphorus-containing groups	mobidb-lite (MOBIDB_LITE); mobidb-lite (MOBIDB_LITE); mobidb-lite (MOBIDB_LITE); mobidb-lite (MOBIDB_LITE); mobidb-lite (MOBIDB_LITE); mobidb-lite (MOBIDB_LITE); mobidb-lite (MOBIDB_LITE); mobidb-lite (MOBIDB_LITE)	no GO terms	no GO terms
EV		DN12093_c0_g1_i1_63725	59	37422	3	3	1	2	1	0.09		Uncharacterised
EV		DN12386_c0_g1_i22_64680	107	30676	3	5	3	5	3	0.36		receptor-type tyrosine-protein phosphatase eta isoform X2	TRUE	[INTERPRO, BLASTED, MAPPED]	279	20	2.26944e-36	47.1	8	P:GO:0006470; P:GO:0016311; P:GO:0035335; F:GO:0004725; F:GO:0016787; F:GO:0016791; C:GO:0016020; C:GO:0016021	P:protein dephosphorylation; P:dephosphorylation; P:peptidyl-tyrosine dephosphorylation; F:protein tyrosine phosphatase activity; F:hydrolase activity; F:phosphatase activity; C:membrane; C:integral component of membrane			IPR013783 (G3DSA:2.60.40.GENE3D); IPR003961 (PFAM); mobidb-lite (MOBIDB_LITE); mobidb-lite (MOBIDB_LITE); PTHR24044 (PANTHER); PTHR24044:SF411 (PANTHER); PTHR24044 (PANTHER); IPR003961 (PROSITE_PROFILES); IPR003961 (PROSITE_PROFILES); IPR003961 (PROSITE_PROFILES); IPR003961 (PROSITE_PROFILES); IPR003961 (CDD); IPR003961 (CDD); IPR036116 (SUPERFAMILY); IPR036116 (SUPERFAMILY)	F:GO:0005515	F:protein binding
EV		DN15114_c0_g1_i1_67613	149	56972	3	5	4	5	4	0.25	5	expressed conserved protein	TRUE	[INTERPRO, BLASTED]	456	20	1.89209e-50	55.47						Coil (COILS); mobidb-lite (MOBIDB_LITE); mobidb-lite (MOBIDB_LITE); mobidb-lite (MOBIDB_LITE); mobidb-lite (MOBIDB_LITE); mobidb-lite (MOBIDB_LITE)	no GO terms	no GO terms
EV		DN3413_c0_g1_i2_38132	135	19446	3	5	4	3	3	0.9	3	Uncharacterised
EV		DN6076_c0_g1_i1_68234	77	48113	3	6	3	6	3	0.22	6	actin, cytoplasmic 2	TRUE	[INTERPRO, BLASTED, MAPPED, ANNOTATED]	376	20	0	89.32	3	F:GO:0005524; C:GO:0005737; C:GO:0005856	F:ATP binding; C:cytoplasm; C:cytoskeleton			IPR004000 (PRINTS); IPR004000 (PFAM); G3DSA:3.30.420.40 (GENE3D); G3DSA:3.90.640.10 (GENE3D); G3DSA:3.30.420.40 (GENE3D); PTHR11937:SF483 (PANTHER); IPR004000 (PANTHER); IPR004001 (PROSITE_PATTERNS); IPR004001 (PROSITE_PATTERNS); cd00012 (CDD); IPR043129 (SUPERFAMILY); IPR043129 (SUPERFAMILY)	no GO terms	no GO terms
EV		DN8618_c0_g1_i2_64066	86	17720	3	5	3	3	2	0.69		Uncharacterised
EV		DN10418_c0_g1_i1_8843	74	47232	2.66667	4	2	4	2	0.14	4	alpha tocopherol transfer protein	TRUE	[INTERPRO, BLASTED]	325	20	0	79.14						IPR036865 (G3DSA:3.40.525.GENE3D); IPR001251 (PFAM); G3DSA:1.10.8.20 (GENE3D); PTHR10174 (PANTHER); IPR001251 (PROSITE_PROFILES); IPR001251 (CDD); IPR036865 (SUPERFAMILY); IPR036273 (SUPERFAMILY)	no GO terms	no GO terms
EV		DN10512_c0_g1_i2_16812	96	27822	2.66667	4	3	4	3	0.4	4	phospholipid scramblase 1-like	TRUE	[INTERPRO, BLASTED, MAPPED]	156	20	3.69762e-28	58.63	2	P:GO:0017121; F:GO:0017128	P:plasma membrane phospholipid scrambling; F:phospholipid scramblase activity			IPR005552 (PFAM); IPR005552 (PANTHER)	P:GO:0017121; F:GO:0017128	P:plasma membrane phospholipid scrambling; F:phospholipid scramblase activity
EV		DN10572_c0_g2_i1_42366	88	27942	2.66667	4	4	4	4	0.57	1	actin related protein 2:3 complex	TRUE	[INTERPRO, BLASTED, MAPPED, ANNOTATED]	167	20	1.1938e-114	96.98	5	P:GO:0034314; F:GO:0003779; C:GO:0005737; C:GO:0005885; C:GO:0016021	P:Arp2/3 complex-mediated actin nucleation; F:actin binding; C:cytoplasm; C:Arp2/3 protein complex; C:integral component of membrane			IPR034666 (G3DSA:3.30.1460.GENE3D); IPR008384 (PIRSF); IPR008384 (PFAM); IPR008384 (PANTHER); PTHR22629:SF1 (PANTHER); cd18521 (CDD); IPR034666 (SUPERFAMILY)	P:GO:0030041; P:GO:0030833; P:GO:0034314; C:GO:0005885; C:GO:0015629	P:actin filament polymerization; P:regulation of actin filament polymerization; P:Arp2/3 complex-mediated actin nucleation; C:Arp2/3 protein complex; C:actin cytoskeleton
EV	Immunomodulators	DN10619_c0_g1_i2_33101	170	37336	2.66667	3	3	1	1	0.19	1	Leukocyte surface antigen CD53	TRUE	[INTERPRO, BLASTED, MAPPED, ANNOTATED]	223	20	1.40726e-71	70.46	1	C:GO:0016020	C:membrane			IPR000301 (PRINTS); IPR018499 (PFAM); IPR008952 (G3DSA:1.10.1450.GENE3D); IPR000301 (PIRSF); PTHR19282 (PANTHER); PTHR19282:SF39 (PANTHER); cd03127 (CDD); IPR008952 (SUPERFAMILY)	C:GO:0016021	C:integral component of membrane
EV		DN10667_c1_g1_i2_72481	58	17666	2.66667	2	1	2	1	0.19	3	Uncharacterised
EV		DN10794_c0_g1_i1_74729	109	50973	2.66667	5	2	5	2	0.13		transmembrane protein 144	TRUE	[INTERPRO, BLASTED, MAPPED, ANNOTATED]	384	20	0	82.99	3	P:GO:0034219; F:GO:0015144; C:GO:0016021	P:carbohydrate transmembrane transport; F:carbohydrate transmembrane transporter activity; C:integral component of membrane			IPR012435 (PFAM); IPR010651 (PANTHER)	P:GO:0034219; F:GO:0015144; C:GO:0016021	P:carbohydrate transmembrane transport; F:carbohydrate transmembrane transporter activity; C:integral component of membrane
EV		DN10811_c0_g1_i3_11948	82	29168	2.66667	5	2	4	2	0.24		carbonyl reductase 1	TRUE	[INTERPRO, BLASTED]	122	20	9.88132e-61	86.48						IPR002347 (PRINTS); G3DSA:3.40.50.720 (GENE3D); IPR002347 (PFAM); PTHR43963 (PANTHER); IPR036291 (SUPERFAMILY)	P:GO:0055114	P:oxidation-reduction process
EV		DN11430_c0_g1_i3_70176	93	27742	2.66667	2	1	2	1	0.12	2	expressed conserved protein	TRUE	[INTERPRO, BLASTED]	115	20	2.14148e-19	61.11						mobidb-lite (MOBIDB_LITE); mobidb-lite (MOBIDB_LITE)	no GO terms	no GO terms
EV		DN11731_c1_g2_i2_61007	168	14060	2.66667	3	2	1	1	0.54	1	Uncharacterised
EV		DN11790_c1_g5_i1_61055	81	68701	2.66667	4	1	3	1	0.05		general vesicular transport factor p115	TRUE	[INTERPRO, BLASTED, MAPPED, ANNOTATED]	565	20	0	71.67	4	P:GO:0006886; P:GO:0048280; C:GO:0000139; C:GO:0016021	P:intracellular protein transport; P:vesicle fusion with Golgi apparatus; C:Golgi membrane; C:integral component of membrane			Coil (COILS); Coil (COILS); IPR011989 (G3DSA:1.25.10.GENE3D); IPR006953 (PFAM); mobidb-lite (MOBIDB_LITE); mobidb-lite (MOBIDB_LITE); mobidb-lite (MOBIDB_LITE); mobidb-lite (MOBIDB_LITE); PTHR10013:SF0 (PANTHER); PTHR10013 (PANTHER)	P:GO:0006886; P:GO:0048280; C:GO:0000139; C:GO:0005737	P:intracellular protein transport; P:vesicle fusion with Golgi apparatus; C:Golgi membrane; C:cytoplasm
EV		DN11808_c0_g5_i1_55858	87	32818	2.66667	3	2	3	2	0.21	5	aldo keto reductase family 1 member B4	TRUE	[INTERPRO, BLASTED, MAPPED, ANNOTATED]	244	20	1.71085e-115	77.75	2	P:GO:0055114; F:GO:0016491	P:oxidation-reduction process; F:oxidoreductase activity			IPR020471 (PRINTS); IPR023210 (PFAM); IPR020471 (PIRSF); IPR036812 (G3DSA:3.20.20.GENE3D); PTHR11732:SF482 (PANTHER); IPR020471 (PANTHER); IPR018170 (PROSITE_PATTERNS); IPR018170 (PROSITE_PATTERNS); IPR023210 (CDD); IPR036812 (SUPERFAMILY)	P:GO:0055114; F:GO:0016491	P:oxidation-reduction process; F:oxidoreductase activity
EV		DN12405_c2_g2_i9_45490	78	43245	2.66667	4	1	4	1	0.08		ATP binding cassette subfamily B MDR:TAP	TRUE	[INTERPRO, BLASTED, MAPPED, ANNOTATED]	204	20	7.30842e-67	81.34	5	P:GO:0055085; F:GO:0005524; F:GO:0016887; F:GO:0042626; C:GO:0016021	P:transmembrane transport; F:ATP binding; F:ATPase activity; F:ATPase-coupled transmembrane transporter activity; C:integral component of membrane	EC:3.6.1.3; EC:3.6.1.15	Adenosinetriphosphatase; Nucleoside-triphosphate phosphatase	IPR003439 (PFAM); IPR036640 (G3DSA:1.20.1560.GENE3D); G3DSA:3.40.50.300 (GENE3D); mobidb-lite (MOBIDB_LITE); IPR039421 (PANTHER); IPR039421 (PANTHER); PTHR24221:SF455 (PANTHER); PTHR24221:SF455 (PANTHER); IPR027417 (SUPERFAMILY)	F:GO:0005524; C:GO:0016021	F:ATP binding; C:integral component of membrane
EV	Immunomodulators	DN3303_c0_g1_i1_3647	102	26394	2.66667	4	4	4	4	0.61	6	peroxiredoxin 1	TRUE	[INTERPRO, BLASTED, MAPPED, ANNOTATED]	181	20	5.16085e-105	82.54	4	P:GO:0055114; P:GO:0098869; F:GO:0004601; F:GO:0051920	P:oxidation-reduction process; P:cellular oxidant detoxification; F:peroxidase activity; F:peroxiredoxin activity	EC:1.11.1.15; EC:1.11.1.7	Acting on a peroxide as acceptor; Peroxidase	IPR000866 (PFAM); IPR019479 (PFAM); IPR036249 (G3DSA:3.40.30.GENE3D); IPR024706 (PIRSF); PTHR10681:SF154 (PANTHER); PTHR10681 (PANTHER); IPR013766 (PROSITE_PROFILES); cd03015 (CDD); IPR036249 (SUPERFAMILY)	P:GO:0055114; F:GO:0016209; F:GO:0016491; F:GO:0051920	P:oxidation-reduction process; F:antioxidant activity; F:oxidoreductase activity; F:peroxiredoxin activity
EV		DN4654_c0_g1_i2_49386	68	28928	2.66667	2	1	2	1	0.11	2	tegumental antigen	TRUE	[INTERPRO, BLASTED, MAPPED]	127	20	3.08438e-27	59.95	3	P:GO:0007017; F:GO:0005509; C:GO:0030286	P:microtubule-based process; F:calcium ion binding; C:dynein complex			no IPS match	no IPS match	no IPS match
EV		DN8133_c0_g1_i2_52088	62	99403	2.66667	5	2	5	2	0.07		putative hepatocyte growth factor-regulated tyrosine kinase substrate (hgs)	TRUE	[INTERPRO, BLASTED, MAPPED, ANNOTATED]	758	20	0	68.25	2	P:GO:0006886; F:GO:0046872	P:intracellular protein transport; F:metal ion binding			Coil (COILS); Coil (COILS); Coil (COILS); IPR000306 (PFAM); IPR024641 (PFAM); IPR017073 (PIRSF); IPR008942 (G3DSA:1.25.40.GENE3D); IPR013083 (G3DSA:3.30.40.GENE3D); IPR002014 (PFAM); mobidb-lite (MOBIDB_LITE); mobidb-lite (MOBIDB_LITE); mobidb-lite (MOBIDB_LITE); mobidb-lite (MOBIDB_LITE); mobidb-lite (MOBIDB_LITE); mobidb-lite (MOBIDB_LITE); mobidb-lite (MOBIDB_LITE); mobidb-lite (MOBIDB_LITE); …	P:GO:0006886; F:GO:0046872	P:intracellular protein transport; F:metal ion binding
EV		DN9792_c0_g1_i1_7585	208	25833	2.66667	5	4	2	1	0.27	5	Cytoplasmic and mitochondrial histidine tRNA synthetase	TRUE	[INTERPRO, BLASTED, MAPPED]	168	6	5.12852e-06	83.05	10	P:GO:0006427; P:GO:0055085; F:GO:0000166; F:GO:0004812; F:GO:0004821; F:GO:0005524; F:GO:0016887; F:GO:0042626; C:GO:0016020; C:GO:0016021	P:histidyl-tRNA aminoacylation; P:transmembrane transport; F:nucleotide binding; F:aminoacyl-tRNA ligase activity; F:histidine-tRNA ligase activity; F:ATP binding; F:ATPase activity; F:ATPase-coupled transmembrane transporter activity; C:membrane; C:integral component of membrane			mobidb-lite (MOBIDB_LITE); mobidb-lite (MOBIDB_LITE)	no GO terms	no GO terms
EV	Immunomodulators	DN10391_c0_g1_i2_3748	105	20164	2.33333	4	2	2	1	0.17	3	Leukocyte surface antigen CD53	TRUE	[INTERPRO, BLASTED, MAPPED, ANNOTATED]	165	20	7.14816e-74	77.63	1	C:GO:0016021	C:integral component of membrane			IPR000301 (PRINTS); IPR008952 (G3DSA:1.10.1450.GENE3D); IPR018499 (PFAM); PTHR19282 (PANTHER); PTHR19282:SF39 (PANTHER); cd03127 (CDD); IPR008952 (SUPERFAMILY)	C:GO:0016021	C:integral component of membrane
EV		DN10716_c0_g2_i6_36072	57	56978	2.33333	3	2	3	2	0.12		von Willebrand factor A domain-containing protein 5A	TRUE	[INTERPRO, BLASTED]	515	20	0	76.18						IPR036465 (G3DSA:3.40.50.GENE3D); IPR002035 (PFAM); IPR013694 (PFAM); PTHR45737:SF6 (PANTHER); PTHR45737 (PANTHER); IPR002035 (PROSITE_PROFILES); IPR013694 (PROSITE_PROFILES); IPR036465 (SUPERFAMILY)	no GO terms	no GO terms
EV		DN10988_c0_g1_i2_40267	74	59959	2.33333	4	2	4	2	0.11		oxalate:formate antiporter	TRUE	[INTERPRO, BLASTED, MAPPED, ANNOTATED]	463	20	0	74.96	3	P:GO:0055085; F:GO:0022857; C:GO:0016021	P:transmembrane transport; F:transmembrane transporter activity; C:integral component of membrane			IPR011701 (PFAM); G3DSA:1.20.1250.20 (GENE3D); PTHR11360:SF3 (PANTHER); PTHR11360 (PANTHER); PS51257 (PROSITE_PROFILES); IPR020846 (PROSITE_PROFILES); cd17353 (CDD); IPR036259 (SUPERFAMILY)	P:GO:0055085; F:GO:0022857	P:transmembrane transport; F:transmembrane transporter activity
EV	Immunomodulators	DN11087_c0_g1_i1_53045	86	57003	2.33333	4	3	4	3	0.18	6	Mastin precursor	TRUE	[INTERPRO, BLASTED, MAPPED, ANNOTATED]	454	20	0	62.4	1	F:GO:0008233	F:peptidase activity			IPR001314 (PRINTS); IPR043504 (G3DSA:2.40.10.GENE3D); IPR001254 (PFAM); IPR043504 (G3DSA:2.40.10.GENE3D); IPR043504 (G3DSA:2.40.10.GENE3D); mobidb-lite (MOBIDB_LITE); PTHR24253 (PANTHER); IPR018114 (PROSITE_PATTERNS); IPR001254 (PROSITE_PROFILES); IPR001254 (CDD); IPR009003 (SUPERFAMILY)	P:GO:0006508; F:GO:0004252	P:proteolysis; F:serine-type endopeptidase activity
EV		DN11906_c0_g1_i2_46358	66	67401	2.33333	5	1	5	1	0.05		unnamed protein product	TRUE	[INTERPRO, BLASTED]	547	20	0	66.3						IPR035892 (G3DSA:2.60.40.GENE3D); IPR000008 (PFAM); IPR035892 (G3DSA:2.60.40.GENE3D); mobidb-lite (MOBIDB_LITE); mobidb-lite (MOBIDB_LITE); mobidb-lite (MOBIDB_LITE); mobidb-lite (MOBIDB_LITE); mobidb-lite (MOBIDB_LITE); mobidb-lite (MOBIDB_LITE); IPR043541 (PANTHER); PTHR46129:SF2 (PANTHER); PS51257 (PROSITE_PROFILES); SSF49562 (SUPERFAMILY); SSF49562 (SUPERFAMILY)	no GO terms	no GO terms
EV		DN12720_c0_g3_i2_70963	122	37727	2.33333	5	1	4	1	0.09		transposase Tn4652	TRUE	[INTERPRO, BLASTED, MAPPED]	235	4	1.34928e-16	47.84	2	C:GO:0016020; C:GO:0016021	C:membrane; C:integral component of membrane			mobidb-lite (MOBIDB_LITE); mobidb-lite (MOBIDB_LITE); mobidb-lite (MOBIDB_LITE)	no GO terms	no GO terms
EV		DN5087_c0_g1_i1_13124	84	21591	2.33333	3	1	3	1	0.16		Uncharacterised
EV		DN6770_c0_g1_i1_11489	118	19941	2.33333	4	2	4	2	0.37	2	Fatty acid-binding protein	TRUE	[INTERPRO, BLASTED, MAPPED]	146	20	1.02101e-29	61.01	1	F:GO:0008289	F:lipid binding			IPR000463 (PRINTS); IPR012674 (G3DSA:2.40.128.GENE3D); IPR031259 (PANTHER); IPR012674 (SUPERFAMILY)	F:GO:0008289	F:lipid binding
EV		DN7845_c0_g1_i1_40740	99	29044	2.33333	4	3	4	3	0.38	2	Tubulin polymerization-promoting protein	TRUE	[INTERPRO, BLASTED, MAPPED, ANNOTATED]	175	20	1.05146e-105	81.06	3	P:GO:0001578; P:GO:0046785; F:GO:0015631	P:microtubule bundle formation; P:microtubule polymerization; F:tubulin binding			IPR008907 (PFAM); G3DSA:1.10.238.10 (GENE3D); mobidb-lite (MOBIDB_LITE); IPR008907 (PANTHER); IPR011992 (SUPERFAMILY)	no GO terms	no GO terms
EV		DN8336_c0_g1_i1_74845	65	44526	2.33333	4	2	4	2	0.15		Gamma-soluble NSF attachment protein	TRUE	[INTERPRO, BLASTED, MAPPED, ANNOTATED]	309	20	2.81329e-164	74.24	1	P:GO:0006886	P:intracellular protein transport			IPR011990 (G3DSA:1.25.40.GENE3D); PF14938 (PFAM); IPR000744 (PANTHER); PTHR13768:SF2 (PANTHER); IPR013026 (PROSITE_PROFILES); IPR011990 (SUPERFAMILY)	P:GO:0006886; F:GO:0005515	P:intracellular protein transport; F:protein binding
EV		DN9113_c0_g1_i2_32308	58	19374	2.33333	2	1	1	1	0.17	5	Uncharacterised
EV		DN924_c0_g1_i1_26022	69	23458	2.33333	3	1	3	1	0.14	1	Uncharacterised
EV		DN9799_c0_g1_i1_46050	155	18919	2.33333	4	4	2	2	0.64	4	Dynein light chain 1, cytoplasmic	TRUE	[INTERPRO, BLASTED, MAPPED, ANNOTATED]	100	20	6.4256e-52	73.03	5	P:GO:0007017; F:GO:0003774; C:GO:0005737; C:GO:0005874; C:GO:0030286	P:microtubule-based process; F:motor activity; C:cytoplasm; C:microtubule; C:dynein complex	EC:3.6.1.15	Nucleoside-triphosphate phosphatase	IPR001372 (PFAM); IPR037177 (G3DSA:3.30.740.GENE3D); mobidb-lite (MOBIDB_LITE); mobidb-lite (MOBIDB_LITE); IPR037177 (SUPERFAMILY)	P:GO:0007017; C:GO:0030286	P:microtubule-based process; C:dynein complex
EV		DN9978_c0_g1_i1_17482	57	136360	2.33333	1	1	1	1	0.02	4	protein transport protein sec24c	TRUE	[INTERPRO, BLASTED, MAPPED, ANNOTATED]	935	20	0	76.69	4	P:GO:0006886; P:GO:0006888; F:GO:0008270; C:GO:0030127	P:intracellular protein transport; P:endoplasmic reticulum to Golgi vesicle-mediated transport; F:zinc ion binding; C:COPII vesicle coat			IPR006895 (PFAM); G3DSA:1.20.120.730 (GENE3D); IPR029006 (G3DSA:3.40.20.GENE3D); IPR006896 (PFAM); IPR036465 (G3DSA:3.40.50.GENE3D); IPR006900 (PFAM); IPR007123 (PFAM); G3DSA:2.60.40.1670 (GENE3D); IPR012990 (PFAM); G3DSA:2.30.30.380 (GENE3D); mobidb-lite (MOBIDB_LITE); mobidb-lite (MOBIDB_LITE); mobidb-lite (MOBIDB_LITE); mobidb-lite (MOBIDB_LITE); PTHR13803 (PANTHER); PTHR13803:SF6 (PANTHER); S…	P:GO:0006886; P:GO:0006888; F:GO:0008270; C:GO:0030127	P:intracellular protein transport; P:endoplasmic reticulum to Golgi vesicle-mediated transport; F:zinc ion binding; C:COPII vesicle coat
EV		DN11387_c1_g1_i5_13639	89	30241	2	4	2	3	1	0.23	4	tetraspanin	TRUE	[INTERPRO, BLASTED, MAPPED]	235	20	3.06724e-54	59.98	2	C:GO:0016020; C:GO:0016021	C:membrane; C:integral component of membrane			IPR018499 (PFAM)	C:GO:0016021	C:integral component of membrane
EV		DN1158_c0_g1_i1_32484	51	37186	2	2	1	2	1	0.09		gamma secretase subunit aph 1	TRUE	[INTERPRO, BLASTED, MAPPED, ANNOTATED]	294	20	5.21548e-150	66.32	4	P:GO:0016485; P:GO:0043085; F:GO:0008410; C:GO:0016021	P:protein processing; P:positive regulation of catalytic activity; F:CoA-transferase activity; C:integral component of membrane			IPR009294 (PFAM); IPR009294 (PANTHER)	P:GO:0016485; P:GO:0043085; C:GO:0016021	P:protein processing; P:positive regulation of catalytic activity; C:integral component of membrane
EV		DN11779_c0_g1_i2_61392	64	52536	2	1	1	1	1	0.06	6	receptor type tyrosine protein phosphatase	TRUE	[INTERPRO, BLASTED, MAPPED, ANNOTATED]	192	20	5.79453e-93	63.93	2	P:GO:0035335; F:GO:0004725	P:peptidyl-tyrosine dephosphorylation; F:protein tyrosine phosphatase activity	EC:3.1.3.48	Protein-tyrosine-phosphatase	IPR000242 (PRINTS); IPR029021 (G3DSA:3.90.190.GENE3D); IPR000242 (PFAM); PTHR19134 (PANTHER); IPR000242 (PROSITE_PROFILES); IPR000387 (PROSITE_PROFILES); cd00047 (CDD); IPR029021 (SUPERFAMILY)	P:GO:0006470; P:GO:0016311; F:GO:0004725; F:GO:0016791	P:protein dephosphorylation; P:dephosphorylation; F:protein tyrosine phosphatase activity; F:phosphatase activity
EV		DN12763_c0_g1_i4_70550	60	13084	2	3	1	3	1	0.26		Uncharacterised
EV		DN1410_c0_g1_i2_69244	68	29790	2	3	2	3	2	0.24		programmed cell death protein	TRUE	[INTERPRO, BLASTED, MAPPED, ANNOTATED]	169	20	1.37392e-96	78.54	1	F:GO:0005509	F:calcium ion binding			IPR002048 (PFAM); IPR002048 (PFAM); G3DSA:1.10.238.10 (GENE3D); PTHR46212:SF4 (PANTHER); PTHR46212 (PANTHER); IPR018247 (PROSITE_PATTERNS); IPR018247 (PROSITE_PATTERNS); IPR002048 (PROSITE_PROFILES); IPR002048 (PROSITE_PROFILES); IPR002048 (PROSITE_PROFILES); IPR002048 (PROSITE_PROFILES); cd16180 (CDD); IPR011992 (SUPERFAMILY)	F:GO:0005509	F:calcium ion binding
EV		DN3309_c0_g1_i1_3629	64	50149	2	5	2	5	2	0.14		synaptobrevin YKT6	TRUE	[INTERPRO, BLASTED, MAPPED, ANNOTATED]	198	20	9.71795e-121	82.93	2	P:GO:0016192; C:GO:0016021	P:vesicle-mediated transport; C:integral component of membrane			IPR001388 (PRINTS); G3DSA:1.20.5.110 (GENE3D); G3DSA:3.30.450.50 (GENE3D); IPR010908 (PFAM); IPR001388 (PFAM); PTHR45806 (PANTHER); PTHR45806:SF1 (PANTHER); IPR042855 (PROSITE_PROFILES); IPR010908 (PROSITE_PROFILES); IPR010908 (CDD); SSF58038 (SUPERFAMILY); IPR011012 (SUPERFAMILY)	P:GO:0016192; C:GO:0016021	P:vesicle-mediated transport; C:integral component of membrane
EV		DN5793_c0_g1_i1_52805	79	32559	2	4	2	3	1	0.21		No hit	TRUE	[INTERPRO, NO-BLAST]	215									Coil (COILS); mobidb-lite (MOBIDB_LITE); mobidb-lite (MOBIDB_LITE); mobidb-lite (MOBIDB_LITE); mobidb-lite (MOBIDB_LITE); mobidb-lite (MOBIDB_LITE); mobidb-lite (MOBIDB_LITE); mobidb-lite (MOBIDB_LITE)	no GO terms	no GO terms
EV		DN8196_c0_g1_i1_27920	104	36154	2	4	2	3	2	0.19	6	hydroxyacylglutathione hydrolase	TRUE	[INTERPRO, BLASTED, MAPPED, ANNOTATED]	283	20	1.32376e-154	76.51	2	P:GO:0019243; F:GO:0004416	P:methylglyoxal catabolic process to D-lactate via S-lactoyl-glutathione; F:hydroxyacylglutathione hydrolase activity	EC:3.1.2.6	Hydroxyacylglutathione hydrolase	IPR001279 (PFAM); IPR017782 (PIRSF); IPR036866 (G3DSA:3.60.15.GENE3D); IPR032282 (PFAM); IPR017782 (TIGRFAM); PTHR11935 (PANTHER); IPR017782 (HAMAP); IPR035680 (CDD); IPR036866 (SUPERFAMILY)	P:GO:0019243; F:GO:0004416	P:methylglyoxal catabolic process to D-lactate via S-lactoyl-glutathione; F:hydroxyacylglutathione hydrolase activity
EV		DN8376_c0_g1_i1_22542	84	27288	2	3	3	3	3	0.41	5	tegumental antigen	TRUE	[INTERPRO, BLASTED, MAPPED]	185	20	7.67437e-58	62.6	3	P:GO:0007017; F:GO:0005509; C:GO:0030286	P:microtubule-based process; F:calcium ion binding; C:dynein complex			IPR001372 (PFAM); IPR037177 (G3DSA:3.30.740.GENE3D); IPR037177 (SUPERFAMILY)	P:GO:0007017; C:GO:0030286	P:microtubule-based process; C:dynein complex
EV		DN8719_c0_g1_i1_13907	63	28403	2	3	1	3	1	0.12	2	Calcium binding protein	TRUE	[INTERPRO, BLASTED, MAPPED, ANNOTATED]	162	20	3.58091e-76	74.38	1	F:GO:0005509	F:calcium ion binding			IPR002048 (PFAM); G3DSA:1.10.238.10 (GENE3D); G3DSA:1.10.238.10 (GENE3D); PTHR23050:SF382 (PANTHER); PTHR23050 (PANTHER); IPR018247 (PROSITE_PATTERNS); IPR018247 (PROSITE_PATTERNS); IPR018247 (PROSITE_PATTERNS); IPR002048 (PROSITE_PROFILES); IPR002048 (PROSITE_PROFILES); IPR002048 (PROSITE_PROFILES); IPR002048 (CDD); IPR002048 (CDD); IPR011992 (SUPERFAMILY)	F:GO:0005509	F:calcium ion binding
EV		DN8829_c0_g1_i3_9726	69	12367	2	3	2	2	1	0.63	5	Uncharacterised
EV		DN10753_c0_g1_i1_47583	65	28224	1.66667	3	2	3	2	0.25	3	unnamed protein product	TRUE	[INTERPRO, BLASTED]	170	1	7.16019e-08	47.25						mobidb-lite (MOBIDB_LITE)	no GO terms	no GO terms
EV		DN10929_c0_g1_i1_65099	71	48409	1.66667	2	1	2	1	0.07	2	Ras-related protein Rap-1b	TRUE	[INTERPRO, BLASTED, MAPPED, ANNOTATED]	183	20	3.30708e-132	94.19	7	P:GO:0032486; F:GO:0003924; F:GO:0005525; C:GO:0005829; C:GO:0005886; C:GO:0030054; C:GO:0070062	P:Rap protein signal transduction; F:GTPase activity; F:GTP binding; C:cytosol; C:plasma membrane; C:cell junction; C:extracellular exosome	EC:3.6.1.15	Nucleoside-triphosphate phosphatase	PR00449 (PRINTS); G3DSA:3.40.50.300 (GENE3D); IPR001806 (PFAM); IPR005225 (TIGRFAM); IPR020849 (PANTHER); PTHR24070:SF424 (PANTHER); IPR020849 (PROSITE_PROFILES); IPR038851 (CDD); IPR027417 (SUPERFAMILY)	P:GO:0007165; P:GO:0032486; F:GO:0003924; F:GO:0005525; C:GO:0016020	P:signal transduction; P:Rap protein signal transduction; F:GTPase activity; F:GTP binding; C:membrane
EV		DN11387_c1_g1_i20_13647	77	19784	1.66667	2	1	2	1	0.17		tetraspanin	TRUE	[INTERPRO, BLASTED, MAPPED]	143	20	3.89404e-23	54	2	C:GO:0016020; C:GO:0016021	C:membrane; C:integral component of membrane			IPR018499 (PFAM); IPR008952 (G3DSA:1.10.1450.GENE3D); cd03127 (CDD); IPR008952 (SUPERFAMILY)	C:GO:0016021	C:integral component of membrane
EV	Immunomodulators	DN11397_c0_g1_i1_39146	54	36731	1.66667	2	1	2	1	0.09		Uncharacterised
EV		DN11814_c0_g2_i1_55922	57	10443	1.66667	3	1	3	1	0.33		Uncharacterised
EV		DN11864_c0_g1_i11_55757	67	30920	1.66667	2	1	2	1	0.11	1	retinol dehydrogenase 11	TRUE	[INTERPRO, BLASTED, MAPPED, ANNOTATED]	252	20	2.03891e-98	75.39	1	C:GO:0016021	C:integral component of membrane			IPR002347 (PFAM); G3DSA:3.40.50.720 (GENE3D); PTHR43157:SF45 (PANTHER); PTHR43157:SF45 (PANTHER); PTHR43157 (PANTHER); IPR036291 (SUPERFAMILY)	P:GO:0055114	P:oxidation-reduction process
EV		DN12741_c0_g3_i1_70786	107	13506	1.66667	4	1	4	1	0.25		Uncharacterised
EV		DN2461_c0_g1_i1_68950	96	20356	1.66667	3	2	3	2	0.36	3	Hyp2p	TRUE	[INTERPRO, BLASTED, MAPPED, ANNOTATED]	156	20	3.8594e-77	78.29	6	P:GO:0006413; P:GO:0045901; P:GO:0045905; F:GO:0003743; F:GO:0003746; F:GO:0043022	P:translational initiation; P:positive regulation of translational elongation; P:positive regulation of translational termination; F:translation initiation factor activity; F:translation elongation factor activity; F:ribosome binding			IPR020189 (PFAM); IPR014722 (G3DSA:2.30.30.GENE3D); IPR001884 (TIGRFAM); IPR001884 (PIRSF); G3DSA:2.40.50.140 (GENE3D); IPR013185 (PFAM); PTHR11673:SF6 (PANTHER); IPR001884 (PANTHER); IPR019769 (PROSITE_PATTERNS); IPR012340 (SUPERFAMILY); IPR008991 (SUPERFAMILY)	P:GO:0045901; P:GO:0045905; F:GO:0003723; F:GO:0003746; F:GO:0043022	P:positive regulation of translational elongation; P:positive regulation of translational termination; F:RNA binding; F:translation elongation factor activity; F:ribosome binding
EV		DN2734_c0_g1_i1_9509	77	10614	1.66667	3	1	2	1	0.32		Uncharacterised
EV		DN339_c0_g1_i1_45117	52	53561	1.66667	1	1	1	1	0.06	6	Proteasome subunit alpha type-3	TRUE	[INTERPRO, BLASTED, MAPPED, ANNOTATED]	256	20	9.35231e-172	88.68	5	P:GO:0006511; F:GO:0004298; C:GO:0005634; C:GO:0005737; C:GO:0019773	P:ubiquitin-dependent protein catabolic process; F:threonine-type endopeptidase activity; C:nucleus; C:cytoplasm; C:proteasome core complex, alpha-subunit complex	EC:3.4.99; EC:3.4.25	Acting on peptide bonds (peptidases); Acting on peptide bonds (peptidases)	IPR001353 (PFAM); IPR000426 (PFAM); IPR029055 (G3DSA:3.60.20.GENE3D); mobidb-lite (MOBIDB_LITE); PTHR11599 (PANTHER); IPR037555 (PTHR11599:PANTHER); IPR000426 (PROSITE_PATTERNS); IPR023332 (PROSITE_PROFILES); cd03751 (CDD); IPR029055 (SUPERFAMILY)	P:GO:0006511; P:GO:0051603; C:GO:0005839; C:GO:0019773	P:ubiquitin-dependent protein catabolic process; P:proteolysis involved in cellular protein catabolic process; C:proteasome core complex; C:proteasome core complex, alpha-subunit complex
EV		DN360_c0_g1_i2_45098	80	23938	1.66667	1	1	1	1	0.14	2	Calmodulin	TRUE	[INTERPRO, BLASTED, MAPPED, ANNOTATED]	183	20	1.20002e-70	80.75	2	P:GO:0019722; F:GO:0005509	P:calcium-mediated signaling; F:calcium ion binding			PR00450 (PRINTS); G3DSA:1.10.238.10 (GENE3D); G3DSA:1.10.238.10 (GENE3D); G3DSA:1.10.238.10 (GENE3D); IPR002048 (PFAM); PTHR23050:SF427 (PANTHER); PTHR23050 (PANTHER); IPR018247 (PROSITE_PATTERNS); IPR018247 (PROSITE_PATTERNS); IPR018247 (PROSITE_PATTERNS); IPR002048 (PROSITE_PROFILES); IPR002048 (PROSITE_PROFILES); IPR002048 (PROSITE_PROFILES); IPR002048 (PROSITE_PROFILES); IPR002048 (CDD); IPR0…	F:GO:0005509	F:calcium ion binding
EV		DN4464_c0_g1_i1_47764	95	49110	1.66667	4	1	4	1	0.07		growth factor receptor bound protein 2	TRUE	[INTERPRO, BLASTED]	250	20	2.01539e-179	82.66						IPR000980 (PRINTS); PR00499 (PRINTS); IPR001452 (PRINTS); IPR000980 (PFAM); IPR036860 (G3DSA:3.30.505.GENE3D); G3DSA:2.30.30.40 (GENE3D); IPR001452 (PFAM); G3DSA:2.30.30.40 (GENE3D); IPR030219 (PTHR19969:PANTHER); PTHR19969 (PANTHER); IPR000980 (PROSITE_PROFILES); IPR001452 (PROSITE_PROFILES); IPR001452 (PROSITE_PROFILES); cd00174 (CDD); cd09941 (CDD); cd11804 (CDD); IPR036860 (SUPERFAMILY); IPR0…	F:GO:0005515	F:protein binding
EV		DN6146_c0_g1_i2_38481	79	19233	1.66667	1	1	1	1	0.18	1	Uncharacterised
EV		DN6780_c0_g1_i2_76288	72	28737	1.66667	2	1	2	1	0.12	1	protein dj-1beta	TRUE	[INTERPRO, BLASTED]	185	20	7.17567e-97	77.89						IPR006287 (TIGRFAM); IPR002818 (PFAM); IPR029062 (G3DSA:3.40.50.GENE3D); PTHR48094 (PANTHER); PTHR48094:SF12 (PANTHER); cd03135 (CDD); IPR029062 (SUPERFAMILY)	no GO terms	no GO terms
EV		DN7353_c0_g1_i1_18857	59	19487	1.66667	3	2	2	2	0.37	3	Uncharacterised
EV		DN7489_c0_g1_i2_41927	84	24556	1.66667	1	1	1	1	0.14	3	adenylate kinase	TRUE	[INTERPRO, BLASTED, MAPPED, ANNOTATED]	117	20	2.29776e-69	86.11	4	P:GO:0016310; P:GO:0046940; F:GO:0004017; F:GO:0005524	P:phosphorylation; P:nucleoside monophosphate phosphorylation; F:adenylate kinase activity; F:ATP binding	EC:2.7.4.4; EC:2.7.4.3	Nucleoside-phosphate kinase; Adenylate kinase	IPR000850 (PRINTS); PF00406 (PFAM); G3DSA:3.40.50.300 (GENE3D); IPR000850 (PANTHER); PTHR23359:SF70 (PANTHER); IPR033690 (PROSITE_PATTERNS); IPR000850 (CDD); IPR027417 (SUPERFAMILY)	P:GO:0006139; F:GO:0005524; F:GO:0019205	P:nucleobase-containing compound metabolic process; F:ATP binding; F:nucleobase-containing compound kinase activity
EV		DN8352_c0_g1_i1_60471	53	174584	1.66667	1	1	1	1	0.05	4	Uncharacterised
EV		DN8513_c0_g1_i1_51818	74	23775	1.66667	3	1	3	1	0.14		Calcium binding protein	TRUE	[INTERPRO, BLASTED, MAPPED, ANNOTATED]	156	20	9.70025e-70	73.5	1	F:GO:0005509	F:calcium ion binding			G3DSA:1.10.238.10 (GENE3D); IPR002048 (PFAM); G3DSA:1.10.238.10 (GENE3D); PTHR10827 (PANTHER); IPR018247 (PROSITE_PATTERNS); IPR002048 (PROSITE_PROFILES); IPR002048 (PROSITE_PROFILES); IPR002048 (PROSITE_PROFILES); IPR002048 (CDD); IPR011992 (SUPERFAMILY)	F:GO:0005509	F:calcium ion binding
EV		DN8794_c1_g1_i2_13857	53	29432	1.66667	2	1	1	1	0.11	2	unnamed protein product	TRUE	[INTERPRO, BLASTED]	240	13	3.64713e-78	63.05						no IPS match	no IPS match	no IPS match
EV		DN9306_c0_g1_i1_48849	78	27467	1.66667	2	2	2	2	0.26	2	Actin-related protein 2/3 complex subunit 5-like protein	TRUE	[INTERPRO, BLASTED, MAPPED, ANNOTATED]	147	20	6.90368e-94	76.86	2	P:GO:0034314; C:GO:0005885	P:Arp2/3 complex-mediated actin nucleation; C:Arp2/3 protein complex			IPR006789 (PFAM); IPR036743 (G3DSA:1.25.40.GENE3D); IPR030075 (PTHR12644:PANTHER); IPR006789 (PANTHER); IPR036743 (SUPERFAMILY)	P:GO:0030833; P:GO:0034314; C:GO:0005885; C:GO:0015629	P:regulation of actin filament polymerization; P:Arp2/3 complex-mediated actin nucleation; C:Arp2/3 protein complex; C:actin cytoskeleton
EV		DN11233_c0_g1_i4_75082	62	20573	1.33333	3	1	3	1	0.16		Uncharacterised
EV		DN11419_c2_g2_i1_19216	114	28426	1.33333	2	2	2	2	0.25	6	Non-lysosomal glucosylceramidase	TRUE	[INTERPRO, BLASTED, MAPPED, ANNOTATED]	248	20	1.17957e-114	68.57	1	F:GO:0003824	F:catalytic activity			IPR006775 (PFAM); IPR024462 (PFAM); PTHR12654 (PANTHER)	F:GO:0004553	F:hydrolase activity, hydrolyzing O-glycosyl compounds
EV		DN1456_c0_g1_i1_31261	63	19040	1.33333	2	1	2	1	0.18	2	Uncharacterised
EV		DN3520_c0_g1_i1_73951	55	14308	1.33333	1	1	1	1	0.24	6	Uncharacterised
EV		DN5659_c0_g1_i1_59964	52	41261	1.33333	2	1	2	1	0.08		expressed conserved protein	TRUE	[INTERPRO, BLASTED, MAPPED, ANNOTATED]	262	11	1.65588e-138	72	1	C:GO:0016021	C:integral component of membrane			G3DSA:1.20.140.150 (GENE3D); mobidb-lite (MOBIDB_LITE)	no GO terms	no GO terms
EV		DN8615_c0_g1_i3_25917	106	47389	1.33333	3	1	3	1	0.07		transmembrane protein 144	TRUE	[INTERPRO, BLASTED, MAPPED, ANNOTATED]	360	20	0	82.74	3	P:GO:0034219; F:GO:0015144; C:GO:0016021	P:carbohydrate transmembrane transport; F:carbohydrate transmembrane transporter activity; C:integral component of membrane			IPR012435 (PFAM); IPR010651 (PANTHER)	P:GO:0034219; F:GO:0015144; C:GO:0016021	P:carbohydrate transmembrane transport; F:carbohydrate transmembrane transporter activity; C:integral component of membrane
EV		DN8916_c0_g1_i3_15679	61	13217	1.33333	2	1	2	1	0.26		Uncharacterised
EV		DN10852_c0_g1_i7_12202	64	30896	1	1	1	1	1	0.11	5	tetraspanin	TRUE	[INTERPRO, BLASTED, MAPPED]	232	20	1.041e-58	61.01	2	C:GO:0016020; C:GO:0016021	C:membrane; C:integral component of membrane			IPR018499 (PFAM)	C:GO:0016021	C:integral component of membrane
EV		DN11780_c0_g1_i4_60952	62	48768	1	1	1	1	1	0.07	4	expressed conserved protein	TRUE	[INTERPRO, BLASTED]	351	16	1.09087e-27	53.72						Coil (COILS); IPR043792 (PFAM); mobidb-lite (MOBIDB_LITE); mobidb-lite (MOBIDB_LITE); mobidb-lite (MOBIDB_LITE); mobidb-lite (MOBIDB_LITE); mobidb-lite (MOBIDB_LITE)	no GO terms	no GO terms
EV		DN12068_c0_g3_i1_63804	72	38987	1	2	2	2	2	0.18	2	expressed conserved protein	TRUE	[INTERPRO, BLASTED]	251	20	3.11621e-31	59.39						Coil (COILS); Coil (COILS); mobidb-lite (MOBIDB_LITE); mobidb-lite (MOBIDB_LITE); mobidb-lite (MOBIDB_LITE); mobidb-lite (MOBIDB_LITE); mobidb-lite (MOBIDB_LITE)	no GO terms	no GO terms
EV		DN6512_c0_g1_i1_28189	99	16134	1	2	1	2	1	0.21	4	expressed conserved protein	TRUE	[INTERPRO, BLASTED, MAPPED, ANNOTATED]	146	13	2.1791e-47	63.2	1	C:GO:0016020	C:membrane			no IPS match	no IPS match	no IPS match
EV		DN6970_c0_g1_i1_68305	80	35110	1	2	1	2	1	0.09		charged multivesicular body protein 1a-like	TRUE	[INTERPRO, BLASTED, MAPPED, ANNOTATED]	207	20	2.98999e-123	81.92	3	P:GO:0007034; C:GO:0043227; C:GO:0043229	P:vacuolar transport; C:membrane-bounded organelle; C:intracellular organelle			Coil (COILS); IPR005024 (PFAM); IPR042277 (G3DSA:1.20.1260.GENE3D); PTHR10476 (PANTHER); PTHR10476:SF2 (PANTHER)	P:GO:0007034	P:vacuolar transport
EV		DN7720_c0_g1_i1_11007	83	25340	1	1	1	1	1	0.13	3	Coactosin-like protein	TRUE	[INTERPRO, BLASTED, MAPPED, ANNOTATED]	141	20	1.18885e-84	70.76	1	F:GO:0003779	F:actin binding			IPR002108 (PFAM); IPR029006 (G3DSA:3.40.20.GENE3D); PTHR10829 (PANTHER); IPR030502 (PTHR10829:PANTHER); IPR002108 (PROSITE_PROFILES); cd11282 (CDD); SSF55753 (SUPERFAMILY)	F:GO:0003779	F:actin binding
EV		DN8067_c0_g1_i1_17960	78	19379	1	2	1	2	1	0.17	5	unnamed protein product	TRUE	[INTERPRO, BLASTED, MAPPED]	121	3	9.57721e-16	69.81	1	C:GO:0005737	C:cytoplasm			Coil (COILS); IPR027267 (G3DSA:1.20.1270.GENE3D); mobidb-lite (MOBIDB_LITE); mobidb-lite (MOBIDB_LITE); IPR027267 (SUPERFAMILY)	no GO terms	no GO terms
EV	Immunomodulators	DN10391_c0_g1_i10_3751	74	36397	0.666667	1	1	1	1	0.09	3	Leukocyte surface antigen CD53	TRUE	[INTERPRO, BLASTED, MAPPED, ANNOTATED]	226	20	3.16696e-101	76.12	1	C:GO:0016021	C:integral component of membrane			IPR000301 (PRINTS); IPR008952 (G3DSA:1.10.1450.GENE3D); IPR000301 (PIRSF); IPR018499 (PFAM); PTHR19282 (PANTHER); PTHR19282:SF39 (PANTHER); cd03127 (CDD); IPR008952 (SUPERFAMILY)	C:GO:0016021	C:integral component of membrane
EV		DN10794_c0_g1_i4_9781	57	67552	0.666667	1	1	1	1	0.05	6	hypothetical protein EgrG_000663300	TRUE	[INTERPRO, BLASTED, MAPPED]	246	3	5.41673e-16	52.57	2	C:GO:0016020; C:GO:0016021	C:membrane; C:integral component of membrane			mobidb-lite (MOBIDB_LITE)	no GO terms	no GO terms
EV		DN11420_c2_g2_i10_19268	57	19586	0.666667	1	1	1	1	0.17	5	receptor-type tyrosine-protein phosphatase eta	TRUE	[INTERPRO, BLASTED, MAPPED]	176	15	8.99258e-10	46.37	5	P:GO:0006470; P:GO:0035335; F:GO:0004725; C:GO:0016020; C:GO:0016021	P:protein dephosphorylation; P:peptidyl-tyrosine dephosphorylation; F:protein tyrosine phosphatase activity; C:membrane; C:integral component of membrane			IPR013783 (G3DSA:2.60.40.GENE3D); IPR003961 (PROSITE_PROFILES); IPR003961 (PROSITE_PROFILES); IPR003961 (CDD); IPR036116 (SUPERFAMILY)	F:GO:0005515	F:protein binding
EV		DN5490_c0_g1_i1_26382	60	12457	0.666667	1	1	1	1	0.28	4	Uncharacterised
EV		DN5743_c0_g1_i1_2904	60	22832	0.666667	1	1	1	1	0.15	4	No hit	TRUE	[INTERPRO, NO-BLAST]	196									no IPS match	no IPS match	no IPS match
EV		DN5954_c0_g1_i1_54751	58	15255	0.666667	1	1	1	1	0.22	3	Uncharacterised
EV		DN6546_c0_g1_i5_28175	67	12087	0.666667	1	1	1	1	0.28	2	Uncharacterised

## Sheet: Table S3. EVSurface
Supplementary Table S3. The full list of proteins identified on A. perfoliata extracellular vesicles (EVs) surface proteomic dataset (Protein hits shaded in grey and in bold represent known helminth released immune modulators, as also identified in the A. perfoliata transcriptome).
Sample set	Immunomodulators	Accession	Score	Mass	Mean Number Reads	Num. of matches	Num. of significant matches	Num. of sequences	Num. of significant sequences	emPAI	Frame	Description	Column1	Tags	Length	#Hits	e-Value	sim mean	#GO	GO IDs	GO Names	Enzyme Codes	Enzyme Names	InterPro IDs	InterPro GO IDs	InterPro GO Names
EVSurface		DN11838_c0_g1_i2_56054	1302	412370	72	75	39	61	29	0.32		WD repeat and FYVE domain-containing protein 3	TRUE	[INTERPRO, BLASTED, MAPPED, ANNOTATED]	665	20	0	72.52	1	F:GO:0046872	F:metal ion binding			IPR013083 (G3DSA:3.30.40.GENE3D); IPR036372 (G3DSA:1.10.1540.GENE3D); IPR001680 (PFAM); IPR000409 (PFAM); IPR000306 (PFAM); IPR015943 (G3DSA:2.130.10.GENE3D); PTHR46108 (PANTHER); IPR019775 (PROSITE_PATTERNS); IPR001680 (PROSITE_PROFILES); IPR000409 (PROSITE_PROFILES); IPR017986 (PROSITE_PROFILES); IPR017455 (PROSITE_PROFILES); IPR011011 (SUPERFAMILY); IPR036372 (SUPERFAMILY); IPR036322 (SUPERFAM…	F:GO:0005515; F:GO:0046872	F:protein binding; F:metal ion binding
EVSurface		DN10367_c0_g1_i3_29401	1039	55896	50.3333	51	36	20	13	1.8		expressed conserved protein	TRUE	[INTERPRO, BLASTED]	418	8	1.18536e-33	61.91						IPR043792 (PFAM); mobidb-lite (MOBIDB_LITE); mobidb-lite (MOBIDB_LITE); mobidb-lite (MOBIDB_LITE); mobidb-lite (MOBIDB_LITE); mobidb-lite (MOBIDB_LITE); mobidb-lite (MOBIDB_LITE); mobidb-lite (MOBIDB_LITE); mobidb-lite (MOBIDB_LITE)	no GO terms	no GO terms
EVSurface		DN10438_c0_g2_i2_34624	1372	253066	50	80	47	68	40	0.8		putative myosin-10 (Myosin heavy chain, nonmuscle IIb) (Nonmuscle myosin heavy chain IIb) (NMMHC II-b) (NMMHC-IIB) (Cellular myosin heavy chain, type B) (Nonmuscle myosin heavy chain-B) (NMMHC-B)	TRUE	[INTERPRO, BLASTED, MAPPED, ANNOTATED]	1999	20	0	82.97	5	F:GO:0003774; F:GO:0005524; F:GO:0051015; C:GO:0016021; C:GO:0016459	F:motor activity; F:ATP binding; F:actin filament binding; C:integral component of membrane; C:myosin complex	EC:3.6.1.15	Nucleoside-triphosphate phosphatase	Coil (COILS); Coil (COILS); Coil (COILS); Coil (COILS); Coil (COILS); Coil (COILS); Coil (COILS); Coil (COILS); Coil (COILS); Coil (COILS); Coil (COILS); IPR001609 (PRINTS); G3DSA:1.20.58.530 (GENE3D); IPR027401 (G3DSA:4.10.270.GENE3D); IPR002928 (PFAM); IPR001609 (PFAM); G3DSA:3.30.70.3240 (GENE3D); IPR036961 (G3DSA:3.40.850.GENE3D); IPR004009 (PFAM); IPR008989 (G3DSA:2.30.30.GENE3D); G3DSA:1.20…	F:GO:0003774; F:GO:0005515; F:GO:0005524; F:GO:0051015; C:GO:0016459	F:motor activity; F:protein binding; F:ATP binding; F:actin filament binding; C:myosin complex
EVSurface		DN11822_c0_g2_i2_55872	1617	34766	44.3333	63	44	14	7	1.27		P29	TRUE	[INTERPRO, BLASTED, MAPPED, ANNOTATED]	136	20	5.54159e-59	84.57	1	C:GO:0005737	C:cytoplasm			Coil (COILS); Coil (COILS); IPR004148 (PFAM); IPR027267 (G3DSA:1.20.1270.GENE3D); IPR004148 (PROSITE_PROFILES); IPR027267 (SUPERFAMILY)	F:GO:0005515; C:GO:0005737	F:protein binding; C:cytoplasm
EVSurface		DN9818_c0_g2_i1_37822	470	414851	44.3333	58	19	53	18	0.16		Basement membrane-specific heparan sulfate proteoglycan core protein	TRUE	[INTERPRO, BLASTED, MAPPED, ANNOTATED]	3697	20	0	68.46	1	C:GO:0016021	C:integral component of membrane			IPR013783 (G3DSA:2.60.40.GENE3D); mobidb-lite (MOBIDB_LITE); mobidb-lite (MOBIDB_LITE); mobidb-lite (MOBIDB_LITE); mobidb-lite (MOBIDB_LITE); PTHR12231 (PANTHER); IPR007110 (PROSITE_PROFILES); IPR007110 (PROSITE_PROFILES); IPR007110 (PROSITE_PROFILES); IPR007110 (PROSITE_PROFILES); IPR007110 (PROSITE_PROFILES); IPR007110 (PROSITE_PROFILES); cd00096 (CDD); IPR036179 (SUPERFAMILY)	no GO terms	no GO terms
EVSurface		DN11694_c0_g1_i1_54338	686	297940	37.3333	58	21	49	15	0.23		Spectrin alpha chain	TRUE	[INTERPRO, BLASTED, MAPPED, ANNOTATED]	2442	20	0	90.89	2	F:GO:0005509; C:GO:0016021	F:calcium ion binding; C:integral component of membrane			Coil (COILS); Coil (COILS); Coil (COILS); Coil (COILS); Coil (COILS); Coil (COILS); Coil (COILS); Coil (COILS); Coil (COILS); Coil (COILS); Coil (COILS); Coil (COILS); Coil (COILS); Coil (COILS); Coil (COILS); Coil (COILS); PR01887 (PRINTS); IPR001452 (PRINTS); IPR014837 (PFAM); G3DSA:1.10.238.10 (GENE3D); G3DSA:1.20.58.60 (GENE3D); G3DSA:2.30.30.40 (GENE3D); IPR001452 (PFAM); G3DSA:1.20.58.60 (G…	F:GO:0005509; F:GO:0005515	F:calcium ion binding; F:protein binding
EVSurface		DN11921_c1_g2_i1_46303	701	80410	37.3333	41	19	32	13	0.9		expressed conserved protein	TRUE	[INTERPRO, BLASTED]	534	16	4.87192e-115	46.82						Coil (COILS); mobidb-lite (MOBIDB_LITE); mobidb-lite (MOBIDB_LITE); mobidb-lite (MOBIDB_LITE)	no GO terms	no GO terms
EVSurface		DN10026_c0_g1_i2_27828	296	259539	33.6667	41	9	38	9	0.12		myosin XV	TRUE	[INTERPRO, BLASTED, MAPPED, ANNOTATED]	2186	20	0	80.26	5	P:GO:0007605; F:GO:0003774; F:GO:0003779; F:GO:0005524; C:GO:0016459	P:sensory perception of sound; F:motor activity; F:actin binding; F:ATP binding; C:myosin complex	EC:3.6.1.15	Nucleoside-triphosphate phosphatase	Coil (COILS); IPR001609 (PRINTS); G3DSA:1.20.120.720 (GENE3D); IPR036961 (G3DSA:3.40.850.GENE3D); IPR000048 (PFAM); IPR000857 (PFAM); IPR001609 (PFAM); G3DSA:1.20.58.530 (GENE3D); IPR038185 (G3DSA:1.25.40.GENE3D); G3DSA:3.30.70.3240 (GENE3D); G3DSA:1.20.5.190 (GENE3D); G3DSA:1.10.10.820 (GENE3D); mobidb-lite (MOBIDB_LITE); mobidb-lite (MOBIDB_LITE); mobidb-lite (MOBIDB_LITE); mobidb-lite (MOBIDB_…	F:GO:0003774; F:GO:0005515; F:GO:0005524; C:GO:0005856; C:GO:0016459	F:motor activity; F:protein binding; F:ATP binding; C:cytoskeleton; C:myosin complex
EVSurface		DN6173_c0_g1_i4_63619	759	164073	33	42	19	36	17	0.43		Collagen alpha-2(I) chain	TRUE	[INTERPRO, BLASTED, MAPPED, ANNOTATED]	1312	20	0	73.28	3	F:GO:0005201; C:GO:0005581; C:GO:0016021	F:extracellular matrix structural constituent; C:collagen trimer; C:integral component of membrane			IPR008160 (PFAM); G3DSA:2.60.120.1000 (GENE3D); IPR000885 (PFAM); mobidb-lite (MOBIDB_LITE); mobidb-lite (MOBIDB_LITE); mobidb-lite (MOBIDB_LITE); mobidb-lite (MOBIDB_LITE); mobidb-lite (MOBIDB_LITE); mobidb-lite (MOBIDB_LITE); mobidb-lite (MOBIDB_LITE); PTHR24023:SF58 (PANTHER); PTHR24023 (PANTHER); PTHR24023:SF58 (PANTHER); PTHR24023 (PANTHER); PTHR24023:SF58 (PANTHER); PTHR24023 (PANTHER); PTH…	F:GO:0005201	F:extracellular matrix structural constituent
EVSurface		DN7822_c0_g2_i1_27391	114	355542	32	34	4	32	4	0.04		expressed conserved protein	TRUE	[INTERPRO, BLASTED, MAPPED, ANNOTATED]	3027	20	0	58.28	3	P:GO:0045104; F:GO:0008092; C:GO:0005856	P:intermediate filament cytoskeleton organization; F:cytoskeletal protein binding; C:cytoskeleton			Coil (COILS); Coil (COILS); Coil (COILS); IPR041615 (PFAM); G3DSA:1.20.58.60 (GENE3D); G3DSA:2.30.30.40 (GENE3D); mobidb-lite (MOBIDB_LITE); mobidb-lite (MOBIDB_LITE); mobidb-lite (MOBIDB_LITE); mobidb-lite (MOBIDB_LITE); mobidb-lite (MOBIDB_LITE); mobidb-lite (MOBIDB_LITE); mobidb-lite (MOBIDB_LITE); mobidb-lite (MOBIDB_LITE); IPR043197 (PANTHER); PTHR23169:SF23 (PANTHER)	P:GO:0045104	P:intermediate filament cytoskeleton organization
EVSurface		DN10746_c0_g1_i6_22331	841	242797	31	46	24	39	18	0.36		expressed conserved protein	TRUE	[INTERPRO, BLASTED]	2104	20	0	64.2						mobidb-lite (MOBIDB_LITE); mobidb-lite (MOBIDB_LITE); mobidb-lite (MOBIDB_LITE)	no GO terms	no GO terms
EVSurface		DN8700_c0_g1_i1_600	1130	46591	29.6667	49	33	16	10	1.79	4	Annexin A7	TRUE	[INTERPRO, BLASTED, MAPPED, ANNOTATED]	324	20	0	78.68	2	F:GO:0005509; F:GO:0005544	F:calcium ion binding; F:calcium-dependent phospholipid binding			IPR001464 (PRINTS); IPR037104 (G3DSA:1.10.220.GENE3D); IPR037104 (G3DSA:1.10.220.GENE3D); IPR037104 (G3DSA:1.10.220.GENE3D); IPR018502 (PFAM); IPR037104 (G3DSA:1.10.220.GENE3D); PTHR10502:SF226 (PANTHER); PTHR10502 (PANTHER); IPR018502 (PROSITE_PROFILES); IPR018502 (PROSITE_PROFILES); IPR018502 (PROSITE_PROFILES); IPR018502 (PROSITE_PROFILES); IPR037104 (SUPERFAMILY)	F:GO:0005509; F:GO:0005544	F:calcium ion binding; F:calcium-dependent phospholipid binding
EVSurface		DN11834_c0_g1_i3_56030	596	116267	29	33	20	29	19	0.74		Leucine-rich repeat-containing protein	TRUE	[INTERPRO, BLASTED]	650	13	0	58.29						IPR032675 (G3DSA:3.80.10.GENE3D); SSF52047 (SUPERFAMILY); SSF52047 (SUPERFAMILY)	no GO terms	no GO terms
EVSurface		DN9930_c0_g1_i1_67885	1313	46070	28.6667	50	32	13	9	2.03		Annexin A13 (Annexin XIII)	TRUE	[INTERPRO, BLASTED, MAPPED, ANNOTATED]	366	20	0	74.54	2	F:GO:0005509; F:GO:0005544	F:calcium ion binding; F:calcium-dependent phospholipid binding			IPR001464 (PRINTS); IPR018502 (PFAM); IPR037104 (G3DSA:1.10.220.GENE3D); IPR037104 (G3DSA:1.10.220.GENE3D); IPR037104 (G3DSA:1.10.220.GENE3D); IPR037104 (G3DSA:1.10.220.GENE3D); PTHR10502 (PANTHER); PTHR10502:SF226 (PANTHER); IPR018252 (PROSITE_PATTERNS); IPR018502 (PROSITE_PROFILES); IPR018502 (PROSITE_PROFILES); IPR018502 (PROSITE_PROFILES); IPR018502 (PROSITE_PROFILES); IPR037104 (SUPERFAMILY)	F:GO:0005509; F:GO:0005544	F:calcium ion binding; F:calcium-dependent phospholipid binding
EVSurface		DN10747_c0_g1_i5_35870	231	214996	28.3333	29	11	26	10	0.16		microtubule actin cross linking factor 1	TRUE	[INTERPRO, BLASTED, MAPPED]	1891	20	0	61.99	4	P:GO:0045104; P:GO:0098609; F:GO:0050839; C:GO:0030054	P:intermediate filament cytoskeleton organization; P:cell-cell adhesion; F:cell adhesion molecule binding; C:cell junction			mobidb-lite (MOBIDB_LITE); mobidb-lite (MOBIDB_LITE); mobidb-lite (MOBIDB_LITE); mobidb-lite (MOBIDB_LITE); mobidb-lite (MOBIDB_LITE); mobidb-lite (MOBIDB_LITE)	no GO terms	no GO terms
EVSurface		DN10163_c0_g1_i1_35077	393	164151	28	37	11	29	8	0.24		peroxidasin	TRUE	[INTERPRO, BLASTED, MAPPED, ANNOTATED]	1347	20	0	77.54	5	P:GO:0006979; P:GO:0055114; P:GO:0098869; F:GO:0004601; F:GO:0020037	P:response to oxidative stress; P:oxidation-reduction process; P:cellular oxidant detoxification; F:peroxidase activity; F:heme binding	EC:1.11.1.7	Peroxidase	IPR019791 (PRINTS); IPR019791 (PFAM); IPR013783 (G3DSA:2.60.40.GENE3D); PF13927 (PFAM); IPR001611 (PFAM); IPR013783 (G3DSA:2.60.40.GENE3D); IPR037120 (G3DSA:1.10.640.GENE3D); IPR032675 (G3DSA:3.80.10.GENE3D); IPR013098 (PFAM); PTHR11475 (PANTHER); PTHR11475 (PANTHER); PTHR11475:SF58 (PANTHER); PTHR11475:SF58 (PANTHER); PTHR11475:SF58 (PANTHER); PTHR11475 (PANTHER); IPR019791 (PROSITE_PROFILES); I…	P:GO:0006979; P:GO:0055114; F:GO:0004601; F:GO:0005515; F:GO:0020037	P:response to oxidative stress; P:oxidation-reduction process; F:peroxidase activity; F:protein binding; F:heme binding
EVSurface		DN11195_c0_g3_i1_24267	231	281324	28	28	9	27	9	0.11		Spectrin alpha actinin	TRUE	[INTERPRO, BLASTED, MAPPED, ANNOTATED]	2491	20	0	67.75	3	F:GO:0003779; F:GO:0005524; F:GO:0046872	F:actin binding; F:ATP binding; F:metal ion binding			Coil (COILS); Coil (COILS); Coil (COILS); Coil (COILS); Coil (COILS); Coil (COILS); Coil (COILS); Coil (COILS); Coil (COILS); Coil (COILS); Coil (COILS); G3DSA:1.20.58.1940 (GENE3D); IPR002017 (PFAM); G3DSA:1.20.58.1940 (GENE3D); G3DSA:1.20.58.60 (GENE3D); mobidb-lite (MOBIDB_LITE); mobidb-lite (MOBIDB_LITE); mobidb-lite (MOBIDB_LITE); mobidb-lite (MOBIDB_LITE); mobidb-lite (MOBIDB_LITE); mobidb-…	F:GO:0005515	F:protein binding
EVSurface		DN11757_c0_g1_i1_61366	613	257438	28	40	21	37	19	0.29		myosin heavy chain	TRUE	[INTERPRO, BLASTED, MAPPED, ANNOTATED]	1950	20	0	92.82	4	F:GO:0003774; F:GO:0005524; F:GO:0051015; C:GO:0016459	F:motor activity; F:ATP binding; F:actin filament binding; C:myosin complex	EC:3.6.1.15	Nucleoside-triphosphate phosphatase	Coil (COILS); Coil (COILS); Coil (COILS); Coil (COILS); Coil (COILS); Coil (COILS); Coil (COILS); Coil (COILS); Coil (COILS); Coil (COILS); Coil (COILS); IPR001609 (PRINTS); G3DSA:1.20.5.1050 (GENE3D); IPR027401 (G3DSA:4.10.270.GENE3D); G3DSA:1.20.5.370 (GENE3D); IPR004009 (PFAM); IPR036961 (G3DSA:3.40.850.GENE3D); G3DSA:3.30.70.3240 (GENE3D); G3DSA:1.20.5.370 (GENE3D); IPR002928 (PFAM); G3DSA:1.…	F:GO:0003774; F:GO:0005515; F:GO:0005524; F:GO:0051015; C:GO:0016459	F:motor activity; F:protein binding; F:ATP binding; F:actin filament binding; C:myosin complex
EVSurface		DN12581_c0_g1_i2_73130	634	79699	26.6667	36	20	25	15	1.07		Heat shock 70 kDa protein 4	TRUE	[INTERPRO, BLASTED, MAPPED, ANNOTATED]	647	20	0	95.29	3	P:GO:0006457; F:GO:0005524; F:GO:0051082	P:protein folding; F:ATP binding; F:unfolded protein binding			Coil (COILS); PR00301 (PRINTS); G3DSA:3.90.640.10 (GENE3D); IPR029048 (G3DSA:1.20.1270.GENE3D); G3DSA:3.30.30.30 (GENE3D); IPR013126 (PFAM); G3DSA:3.30.420.40 (GENE3D); IPR029047 (G3DSA:2.60.34.GENE3D); G3DSA:3.30.420.40 (GENE3D); mobidb-lite (MOBIDB_LITE); IPR013126 (PANTHER); PTHR19375:SF210 (PANTHER); IPR018181 (PROSITE_PATTERNS); IPR018181 (PROSITE_PATTERNS); IPR018181 (PROSITE_PATTERNS); cd1…	no GO terms	no GO terms
EVSurface	Immunomodulators	DN9786_c0_g1_i1_72692	931	114026	25.6667	51	24	38	17	0.81		calpain A	TRUE	[INTERPRO, BLASTED, MAPPED, ANNOTATED]	871	20	0	77.64	4	P:GO:0006508; F:GO:0004198; F:GO:0005509; C:GO:0016021	P:proteolysis; F:calcium-dependent cysteine-type endopeptidase activity; F:calcium ion binding; C:integral component of membrane	EC:3.4.22; EC:3.4.22.1; EC:3.4.99; EC:3.4.22.41; EC:3.4.22.40; EC:3.4.22.34; EC:3.4.22.8; EC:3.4.22.28; EC:3.4.22.16; EC:3.4.22.27; EC:3.4.22.38; EC:3.4.22.15; EC:3.4.22.14	Acting on peptide bonds (peptidases); Cathepsin B; Acting on peptide bonds (peptidases); Cathepsin F; Bleomycin hydrolase; Legumain; Clostripain; Picornain 3C; Cathepsin H; Cathepsin S; Cathepsin K; Cathepsin L; Actinidain	IPR022684 (PRINTS); IPR001300 (PFAM); IPR002048 (PFAM); IPR022682 (PFAM); G3DSA:2.60.120.380 (GENE3D); G3DSA:3.90.70.10 (GENE3D); mobidb-lite (MOBIDB_LITE); PTHR10183 (PANTHER); PTHR10183:SF396 (PANTHER); IPR018247 (PROSITE_PATTERNS); IPR000169 (PROSITE_PATTERNS); IPR002048 (PROSITE_PROFILES); IPR001300 (PROSITE_PROFILES); IPR002048 (PROSITE_PROFILES); IPR002048 (PROSITE_PROFILES); IPR033883 (CDD…	P:GO:0006508; F:GO:0004198; F:GO:0005509	P:proteolysis; F:calcium-dependent cysteine-type endopeptidase activity; F:calcium ion binding
EVSurface		DN11614_c0_g2_i3_53973	338	417695	24.3333	43	9	36	8	0.07		expressed conserved protein	TRUE	[INTERPRO, BLASTED, MAPPED, ANNOTATED]	3470	20	0	79.19	4	P:GO:0006468; F:GO:0004672; F:GO:0005524; C:GO:0016021	P:protein phosphorylation; F:protein kinase activity; F:ATP binding; C:integral component of membrane			PR00014 (PRINTS); IPR013783 (G3DSA:2.60.40.GENE3D); IPR013098 (PFAM); IPR013783 (G3DSA:2.60.40.GENE3D); IPR013783 (G3DSA:2.60.40.GENE3D); IPR013783 (G3DSA:2.60.40.GENE3D); IPR000719 (PFAM); IPR013783 (G3DSA:2.60.40.GENE3D); G3DSA:3.30.200.20 (GENE3D); G3DSA:1.10.510.10 (GENE3D); IPR013783 (G3DSA:2.60.40.GENE3D); IPR013783 (G3DSA:2.60.40.GENE3D); IPR003961 (PFAM); mobidb-lite (MOBIDB_LITE); mobidb…	P:GO:0006468; F:GO:0004672; F:GO:0005515; F:GO:0005524	P:protein phosphorylation; F:protein kinase activity; F:protein binding; F:ATP binding
EVSurface		DN10463_c3_g1_i2_34420	329	159558	23	22	10	20	8	0.18		Plasma membrane calcium-transporting ATPase 3	TRUE	[INTERPRO, BLASTED, MAPPED, ANNOTATED]	1166	20	0	82.57	4	P:GO:0070588; F:GO:0005388; F:GO:0005524; C:GO:0016021	P:calcium ion transmembrane transport; F:calcium transmembrane transporter activity, phosphorylative mechanism; F:ATP binding; C:integral component of membrane	EC:7.2.2.10	P-type Ca(2+) transporter	PR00119 (PRINTS); PF13246 (PFAM); IPR022141 (PFAM); PF00702 (PFAM); IPR001757 (TIGRFAM); PF00122 (PFAM); IPR006068 (PFAM); IPR004014 (PFAM); IPR006408 (TIGRFAM); mobidb-lite (MOBIDB_LITE); mobidb-lite (MOBIDB_LITE); mobidb-lite (MOBIDB_LITE); mobidb-lite (MOBIDB_LITE); mobidb-lite (MOBIDB_LITE); PTHR24093 (PANTHER); IPR030320 (PTHR24093:PANTHER); IPR018303 (PROSITE_PATTERNS); cd02081 (CDD); IPR03…	P:GO:0070588; F:GO:0000166; F:GO:0005388; F:GO:0005524; C:GO:0016020; C:GO:0016021	P:calcium ion transmembrane transport; F:nucleotide binding; F:calcium transmembrane transporter activity, phosphorylative mechanism; F:ATP binding; C:membrane; C:integral component of membrane
EVSurface		DN10879_c1_g1_i8_12057	310	94038	22.6667	21	8	17	6	0.32		von Willebrand factor A domain containing protein	TRUE	[INTERPRO, BLASTED]	796	20	0	73.96						IPR013694 (PFAM); IPR002035 (PFAM); IPR036465 (G3DSA:3.40.50.GENE3D); PTHR45737:SF6 (PANTHER); PTHR45737 (PANTHER); IPR002035 (PROSITE_PROFILES); IPR013694 (PROSITE_PROFILES); IPR036465 (SUPERFAMILY)	no GO terms	no GO terms
EVSurface	Immunomodulators	DN14469_c0_g1_i1_24672	474	56481	22.6667	26	17	22	13	1.47		enolase	TRUE	[INTERPRO, BLASTED, MAPPED, ANNOTATED]	433	20	0	93.4	8	P:GO:0006096; P:GO:0006122; P:GO:0006367; F:GO:0000287; F:GO:0004634; F:GO:0016787; C:GO:0000015; C:GO:0005750	P:glycolytic process; P:mitochondrial electron transport, ubiquinol to cytochrome c; P:transcription initiation from RNA polymerase II promoter; F:magnesium ion binding; F:phosphopyruvate hydratase activity; F:hydrolase activity; C:phosphopyruvate hydratase complex; C:mitochondrial respiratory chain complex III	EC:4.2.1.11	Phosphopyruvate hydratase	IPR000941 (PRINTS); IPR000941 (TIGRFAM); IPR000941 (PIRSF); IPR029017 (G3DSA:3.30.390.GENE3D); IPR036849 (G3DSA:3.20.20.GENE3D); IPR020811 (PFAM); IPR020810 (PFAM); IPR000941 (PANTHER); IPR020809 (PROSITE_PATTERNS); IPR000941 (HAMAP); IPR000941 (CDD); IPR036849 (SUPERFAMILY); IPR029017 (SUPERFAMILY)	P:GO:0006096; F:GO:0000287; F:GO:0004634; C:GO:0000015	P:glycolytic process; F:magnesium ion binding; F:phosphopyruvate hydratase activity; C:phosphopyruvate hydratase complex
EVSurface	Immunomodulators	DN4288_c0_g1_i1_31793	333	95784	22.6667	17	8	15	7	0.27		calpain	TRUE	[INTERPRO, BLASTED, MAPPED, ANNOTATED]	754	20	0	76.76	4	P:GO:0006508; P:GO:0007586; F:GO:0004198; F:GO:0005509	P:proteolysis; P:digestion; F:calcium-dependent cysteine-type endopeptidase activity; F:calcium ion binding	EC:3.4.22; EC:3.4.22.1; EC:3.4.99; EC:3.4.22.41; EC:3.4.22.40; EC:3.4.22.34; EC:3.4.22.8; EC:3.4.22.28; EC:3.4.22.16; EC:3.4.22.27; EC:3.4.22.38; EC:3.4.22.15; EC:3.4.22.14	Acting on peptide bonds (peptidases); Cathepsin B; Acting on peptide bonds (peptidases); Cathepsin F; Bleomycin hydrolase; Legumain; Clostripain; Picornain 3C; Cathepsin H; Cathepsin S; Cathepsin K; Cathepsin L; Actinidain	Coil (COILS); IPR022684 (PRINTS); G3DSA:1.10.238.10 (GENE3D); G3DSA:2.60.120.380 (GENE3D); G3DSA:3.90.70.10 (GENE3D); IPR022682 (PFAM); IPR001300 (PFAM); PTHR10183:SF396 (PANTHER); PTHR10183 (PANTHER); IPR018247 (PROSITE_PATTERNS); IPR000169 (PROSITE_PATTERNS); IPR001300 (PROSITE_PROFILES); IPR002048 (PROSITE_PROFILES); IPR033883 (CDD); cd16182 (CDD); IPR001300 (CDD); IPR038765 (SUPERFAMILY); IPR…	P:GO:0006508; F:GO:0004198; F:GO:0005509	P:proteolysis; F:calcium-dependent cysteine-type endopeptidase activity; F:calcium ion binding
EVSurface		DN6894_c0_g1_i2_12735	631	167726	21.3333	21	12	20	11	0.26		Galectin carbohydrate recognition domain	TRUE	[INTERPRO, BLASTED, MAPPED]	891	20	0	57.43	1	F:GO:0030246	F:carbohydrate binding			G3DSA:2.60.120.200 (GENE3D); IPR001079 (PFAM); mobidb-lite (MOBIDB_LITE); mobidb-lite (MOBIDB_LITE); mobidb-lite (MOBIDB_LITE); mobidb-lite (MOBIDB_LITE); mobidb-lite (MOBIDB_LITE); mobidb-lite (MOBIDB_LITE); mobidb-lite (MOBIDB_LITE); IPR001079 (PROSITE_PROFILES); IPR013320 (SUPERFAMILY)	F:GO:0030246	F:carbohydrate binding
EVSurface		DN5781_c0_g1_i1_2927	1112	27485	20.6667	43	30	10	7	2.52		tegumental antigen	TRUE	[INTERPRO, BLASTED, MAPPED, ANNOTATED]	194	20	1.11707e-95	72.23	3	P:GO:0007017; F:GO:0005509; C:GO:0030286	P:microtubule-based process; F:calcium ion binding; C:dynein complex			IPR001372 (PFAM); IPR037177 (G3DSA:3.30.740.GENE3D); IPR037177 (SUPERFAMILY)	P:GO:0007017; C:GO:0030286	P:microtubule-based process; C:dynein complex
EVSurface		DN10801_c0_g1_i14_11633	594	119058	20.3333	29	16	24	14	0.46		No hit	TRUE	[INTERPRO, NO-BLAST]	1061									mobidb-lite (MOBIDB_LITE); mobidb-lite (MOBIDB_LITE); mobidb-lite (MOBIDB_LITE); mobidb-lite (MOBIDB_LITE); mobidb-lite (MOBIDB_LITE); mobidb-lite (MOBIDB_LITE); mobidb-lite (MOBIDB_LITE); mobidb-lite (MOBIDB_LITE); mobidb-lite (MOBIDB_LITE); mobidb-lite (MOBIDB_LITE); mobidb-lite (MOBIDB_LITE); mobidb-lite (MOBIDB_LITE); mobidb-lite (MOBIDB_LITE); mobidb-lite (MOBIDB_LITE)	no GO terms	no GO terms
EVSurface		DN11364_c0_g2_i1_39228	253	75820	20.3333	29	14	21	12	0.81		phosphoenolpyruvate carboxykinase	TRUE	[INTERPRO, BLASTED, MAPPED, ANNOTATED]	626	20	0	89.31	5	P:GO:0006094; P:GO:0016310; F:GO:0004613; F:GO:0005525; F:GO:0016301	P:gluconeogenesis; P:phosphorylation; F:phosphoenolpyruvate carboxykinase (GTP) activity; F:GTP binding; F:kinase activity	EC:4.1.1.32	Phosphoenolpyruvate carboxykinase (GTP)	IPR013035 (G3DSA:3.90.228.GENE3D); IPR008209 (PIRSF); IPR035077 (PFAM); IPR035078 (PFAM); G3DSA:2.170.8.10 (GENE3D); IPR008210 (G3DSA:3.40.449.GENE3D); PTHR11561:SF0 (PANTHER); IPR008209 (PANTHER); IPR018091 (PROSITE_PATTERNS); IPR008209 (HAMAP); IPR008209 (CDD); SSF53795 (SUPERFAMILY); IPR008210 (SUPERFAMILY)	P:GO:0006094; F:GO:0004611; F:GO:0004613; F:GO:0005525; F:GO:0017076	P:gluconeogenesis; F:phosphoenolpyruvate carboxykinase activity; F:phosphoenolpyruvate carboxykinase (GTP) activity; F:GTP binding; F:purine nucleotide binding
EVSurface	Immunomodulators	DN11960_c0_g1_i1_46290	372	91406	20.3333	22	12	18	10	0.47		molecular chaperone HtpG/HSP90alpha	TRUE	[INTERPRO, BLASTED, MAPPED, ANNOTATED]	743	20	0	90.05	3	P:GO:0006457; F:GO:0005524; F:GO:0051082	P:protein folding; F:ATP binding; F:unfolded protein binding			IPR020575 (PRINTS); IPR037196 (G3DSA:1.20.120.GENE3D); IPR001404 (PIRSF); G3DSA:3.40.50.11260 (GENE3D); IPR003594 (PFAM); G3DSA:3.30.70.2140 (GENE3D); IPR001404 (PFAM); G3DSA:3.30.230.80 (GENE3D); IPR036890 (G3DSA:3.30.565.GENE3D); mobidb-lite (MOBIDB_LITE); mobidb-lite (MOBIDB_LITE); mobidb-lite (MOBIDB_LITE); PTHR11528:SF79 (PANTHER); IPR001404 (PANTHER); IPR019805 (PROSITE_PATTERNS); IPR001404…	P:GO:0006457; F:GO:0005524; F:GO:0051082	P:protein folding; F:ATP binding; F:unfolded protein binding
EVSurface		DN7793_c0_g1_i1_23754	336	41122	20	22	10	18	7	0.86		Annexin A7	TRUE	[INTERPRO, BLASTED, MAPPED, ANNOTATED]	334	20	3.32411e-180	77.98	2	F:GO:0005509; F:GO:0005544	F:calcium ion binding; F:calcium-dependent phospholipid binding			IPR001464 (PRINTS); IPR037104 (G3DSA:1.10.220.GENE3D); IPR018502 (PFAM); IPR037104 (G3DSA:1.10.220.GENE3D); IPR037104 (G3DSA:1.10.220.GENE3D); IPR037104 (G3DSA:1.10.220.GENE3D); PTHR10502 (PANTHER); PTHR10502:SF226 (PANTHER); IPR018502 (PROSITE_PROFILES); IPR018502 (PROSITE_PROFILES); IPR018502 (PROSITE_PROFILES); IPR018502 (PROSITE_PROFILES); IPR037104 (SUPERFAMILY)	F:GO:0005509; F:GO:0005544	F:calcium ion binding; F:calcium-dependent phospholipid binding
EVSurface	Immunomodulators	DN9013_c0_g1_i2_47406	458	61092	20	23	15	15	8	0.98		glycoprotein Antigen 5	TRUE	[INTERPRO, BLASTED, MAPPED, ANNOTATED]	483	20	0	68.67	2	P:GO:0006508; F:GO:0004252	P:proteolysis; F:serine-type endopeptidase activity	EC:3.4.21.73; EC:3.4.24.7; EC:3.4.21.71; EC:3.4.24.3; EC:3.4.21.34; EC:3.4.21.78; EC:3.4.21.75; EC:3.4.21.26; EC:3.4.21.27; EC:3.4.21.68; EC:3.4.21.69; EC:3.4.24.34; EC:3.4.21.41; EC:3.4.21.83; EC:3.4.21.88; EC:3.4.21.45; EC:3.4.21.89; EC:3.4.21.42; EC:3.4.19.1; EC:3.4.21.43; EC:3.4.21.87; EC:3.4.21.38; EC:3.4.21.35; EC:3.4.21.79; EC:3.4.21.36; EC:3.4.21.102; EC:3.4.21.39; EC:3.4.21; EC:3.4.21.4;…	U-plasminogen activator; Interstitial collagenase; Pancreatic elastase II; Microbial collagenase; Plasma kallikrein; Granzyme A; Furin; Prolyl oligopeptidase; Coagulation factor XIa; T-plasminogen activator; Protein C (activated); Neutrophil collagenase; Complement subcomponent C1r; Oligopeptidase B; Repressor LexA; Complement factor I; Signal peptidase I; Complement subcomponent C1s; Acylaminoac…	Coil (COILS); IPR001314 (PRINTS); IPR043504 (G3DSA:2.40.10.GENE3D); IPR001254 (PFAM); IPR043504 (G3DSA:2.40.10.GENE3D); IPR043504 (G3DSA:2.40.10.GENE3D); mobidb-lite (MOBIDB_LITE); PTHR24260 (PANTHER); IPR018114 (PROSITE_PATTERNS); IPR001254 (PROSITE_PROFILES); IPR001254 (CDD); IPR009003 (SUPERFAMILY)	P:GO:0006508; F:GO:0004252	P:proteolysis; F:serine-type endopeptidase activity
EVSurface		DN11263_c0_g1_i4_60744	355	47069	19.6667	25	13	15	8	0.97		Annexin A7	TRUE	[INTERPRO, BLASTED, MAPPED, ANNOTATED]	350	20	0	78.99	2	F:GO:0005509; F:GO:0005544	F:calcium ion binding; F:calcium-dependent phospholipid binding			IPR001464 (PRINTS); IPR037104 (G3DSA:1.10.220.GENE3D); IPR037104 (G3DSA:1.10.220.GENE3D); IPR018502 (PFAM); IPR037104 (G3DSA:1.10.220.GENE3D); IPR037104 (G3DSA:1.10.220.GENE3D); PTHR10502 (PANTHER); IPR018252 (PROSITE_PATTERNS); IPR018502 (PROSITE_PROFILES); IPR018502 (PROSITE_PROFILES); IPR018502 (PROSITE_PROFILES); IPR018502 (PROSITE_PROFILES); IPR037104 (SUPERFAMILY)	F:GO:0005509; F:GO:0005544	F:calcium ion binding; F:calcium-dependent phospholipid binding
EVSurface		DN11977_c0_g1_i2_72857	470	76076	19.3333	25	15	21	11	0.88		H17g protein tegumental antigen	TRUE	[INTERPRO, BLASTED, MAPPED, ANNOTATED]	563	20	0	87.45	2	F:GO:0003779; C:GO:0005856	F:actin binding; C:cytoskeleton			Coil (COILS); Coil (COILS); IPR000798 (PRINTS); IPR019749 (PRINTS); IPR011174 (PIRSF); IPR018979 (PFAM); IPR011259 (PFAM); IPR011993 (G3DSA:2.30.29.GENE3D); IPR018980 (PFAM); G3DSA:1.20.5.450 (GENE3D); G3DSA:3.10.20.90 (GENE3D); IPR014352 (G3DSA:1.20.80.GENE3D); IPR019748 (PFAM); IPR008954 (G3DSA:1.25.40.GENE3D); mobidb-lite (MOBIDB_LITE); mobidb-lite (MOBIDB_LITE); PTHR23281 (PANTHER); PTHR23281…	F:GO:0003779; F:GO:0008092; C:GO:0005856	F:actin binding; F:cytoskeletal protein binding; C:cytoskeleton
EVSurface		DN10491_c0_g3_i2_21343	645	102565	18.6667	25	17	17	13	0.71		Programmed cell death 6-interacting protein	TRUE	[INTERPRO, BLASTED]	839	20	0	72.21						Coil (COILS); IPR025304 (PFAM); IPR004328 (PFAM); IPR038499 (G3DSA:1.25.40.GENE3D); G3DSA:1.20.140.50 (GENE3D); G3DSA:1.20.120.560 (GENE3D); mobidb-lite (MOBIDB_LITE); mobidb-lite (MOBIDB_LITE); mobidb-lite (MOBIDB_LITE); mobidb-lite (MOBIDB_LITE); mobidb-lite (MOBIDB_LITE); PTHR23030 (PANTHER); IPR004328 (PROSITE_PROFILES)	F:GO:0005515	F:protein binding
EVSurface		DN12262_c0_g1_i1_68587	203	55472	17.6667	23	9	17	8	0.68		expressed conserved protein	TRUE	[INTERPRO, BLASTED]	408	10	1.00926e-63	62.53						IPR043792 (PFAM); mobidb-lite (MOBIDB_LITE); mobidb-lite (MOBIDB_LITE); mobidb-lite (MOBIDB_LITE); mobidb-lite (MOBIDB_LITE); mobidb-lite (MOBIDB_LITE); mobidb-lite (MOBIDB_LITE); mobidb-lite (MOBIDB_LITE)	no GO terms	no GO terms
EVSurface		DN8972_c0_g1_i1_2323	395	47626	17.3333	23	11	18	10	1.09		actin modulator protein	TRUE	[INTERPRO, BLASTED, MAPPED, ANNOTATED]	380	20	0	83.98	5	P:GO:0045010; P:GO:0051014; P:GO:0051016; F:GO:0005509; F:GO:0051015	P:actin nucleation; P:actin filament severing; P:barbed-end actin filament capping; F:calcium ion binding; F:actin filament binding			IPR007122 (PRINTS); IPR007123 (PFAM); IPR029006 (G3DSA:3.40.20.GENE3D); IPR029006 (G3DSA:3.40.20.GENE3D); IPR029006 (G3DSA:3.40.20.GENE3D); IPR007122 (PANTHER); PTHR11977:SF109 (PANTHER); cd11290 (CDD); SSF55753 (SUPERFAMILY); SSF55753 (SUPERFAMILY); SSF55753 (SUPERFAMILY)	F:GO:0051015	F:actin filament binding
EVSurface		DN10250_c0_g1_i1_26991	527	257051	17	35	12	28	10	0.16		otoferlin	TRUE	[INTERPRO, BLASTED, MAPPED, ANNOTATED]	2180	20	0	82.76	1	C:GO:0016021	C:integral component of membrane			Coil (COILS); Coil (COILS); IPR012561 (PFAM); IPR035892 (G3DSA:2.60.40.GENE3D); IPR035892 (G3DSA:2.60.40.GENE3D); IPR032362 (PFAM); IPR000008 (PFAM); IPR035892 (G3DSA:2.60.40.GENE3D); IPR035892 (G3DSA:2.60.40.GENE3D); IPR035892 (G3DSA:2.60.40.GENE3D); IPR035892 (G3DSA:2.60.40.GENE3D); mobidb-lite (MOBIDB_LITE); mobidb-lite (MOBIDB_LITE); IPR037721 (PANTHER); IPR000008 (PROSITE_PROFILES); IPR00000…	C:GO:0016021	C:integral component of membrane
EVSurface		DN9481_c0_g1_i1_55273	289	50954	17	17	8	16	7	0.65		ornithine aminotransferase	TRUE	[INTERPRO, BLASTED, MAPPED, ANNOTATED]	431	20	0	88.89	4	F:GO:0004587; F:GO:0030170; F:GO:0050155; C:GO:0016021	F:ornithine-oxo-acid transaminase activity; F:pyridoxal phosphate binding; F:ornithine(lysine) transaminase activity; C:integral component of membrane	EC:2.6.1.13	Ornithine aminotransferase	IPR010164 (TIGRFAM); IPR015421 (G3DSA:3.40.640.GENE3D); IPR005814 (PFAM); IPR005814 (PIRSF); IPR015422 (G3DSA:3.90.1150.GENE3D); PTHR11986 (PANTHER); PTHR11986:SF118 (PANTHER); IPR005814 (PROSITE_PATTERNS); IPR005814 (CDD); IPR015424 (SUPERFAMILY)	F:GO:0003824; F:GO:0004587; F:GO:0008483; F:GO:0030170	F:catalytic activity; F:ornithine-oxo-acid transaminase activity; F:transaminase activity; F:pyridoxal phosphate binding
EVSurface		DN12187_c0_g1_i1_66436	335	110338	16.6667	21	10	21	10	0.34		unnamed protein product	TRUE	[INTERPRO, BLASTED, MAPPED]	866	18	0	68.74	1	C:GO:0005856	C:cytoskeleton			mobidb-lite (MOBIDB_LITE); mobidb-lite (MOBIDB_LITE); mobidb-lite (MOBIDB_LITE); mobidb-lite (MOBIDB_LITE); IPR035915 (SUPERFAMILY)	no GO terms	no GO terms
EVSurface		DN10161_c0_g1_i1_59685	535	82878	16.3333	21	13	13	7	0.47		fascin 2	TRUE	[INTERPRO, BLASTED, MAPPED, ANNOTATED]	640	20	0	64.77	4	P:GO:0007015; P:GO:0016477; F:GO:0030674; F:GO:0051015	P:actin filament organization; P:cell migration; F:protein-macromolecule adaptor activity; F:actin filament binding			IPR022768 (PFAM); G3DSA:2.80.10.50 (GENE3D); G3DSA:2.80.10.50 (GENE3D); mobidb-lite (MOBIDB_LITE); IPR030146 (PTHR10551:PANTHER); IPR010431 (PANTHER); IPR030146 (PTHR10551:PANTHER); IPR010431 (PANTHER); IPR008999 (SUPERFAMILY); IPR008999 (SUPERFAMILY); IPR008999 (SUPERFAMILY)	P:GO:0007015; P:GO:0016477; P:GO:0030036; F:GO:0030674; F:GO:0051015	P:actin filament organization; P:cell migration; P:actin cytoskeleton organization; F:protein-macromolecule adaptor activity; F:actin filament binding
EVSurface		DN10334_c0_g1_i3_17117	570	106374	16.3333	29	14	21	9	0.48		actin, cytoplasmic type 5	TRUE	[INTERPRO, BLASTED, MAPPED, ANNOTATED]	376	20	0	99.35	15	P:GO:0000281; P:GO:0007409; P:GO:0048870; P:GO:0098974; F:GO:0005524; F:GO:0019901; F:GO:0098973; C:GO:0005884; C:GO:0005886; C:GO:0005925; C:GO:0030424; C:GO:0035060; C:GO:0035267; C:GO:0045202; C:GO:0097433	P:mitotic cytokinesis; P:axonogenesis; P:cell motility; P:postsynaptic actin cytoskeleton organization; F:ATP binding; F:protein kinase binding; F:structural constituent of postsynaptic actin cytoskeleton; C:actin filament; C:plasma membrane; C:focal adhesion; C:axon; C:brahma complex; C:NuA4 histone acetyltransferase complex; C:synapse; C:dense body			IPR004000 (PRINTS); G3DSA:3.30.420.40 (GENE3D); G3DSA:3.30.420.40 (GENE3D); IPR004000 (PFAM); G3DSA:3.90.640.10 (GENE3D); PTHR11937:SF192 (PANTHER); IPR004000 (PANTHER); IPR004001 (PROSITE_PATTERNS); IPR020902 (PROSITE_PATTERNS); IPR004001 (PROSITE_PATTERNS); cd00012 (CDD); IPR043129 (SUPERFAMILY); IPR043129 (SUPERFAMILY)	no GO terms	no GO terms
EVSurface		DN5211_c0_g1_i2_35332	381	39251	16	13	9	8	5	0.91		calmodulin	TRUE	[INTERPRO, BLASTED, MAPPED, ANNOTATED]	149	20	4.87143e-102	98.76	29	P:GO:0006468; P:GO:0007099; P:GO:0007605; P:GO:0007608; P:GO:0016060; P:GO:0016061; P:GO:0016062; P:GO:0019722; P:GO:0030048; P:GO:0035071; P:GO:0042052; P:GO:0046716; P:GO:0050790; P:GO:0051383; P:GO:0071361; P:GO:0072499; P:GO:2001259; F:GO:0005509; F:GO:0030234; F:GO:0031489; F:GO:0070855; C:GO:0005813; C:GO:0005814; C:GO:0005938; C:GO:0016028; C:GO:0030496; C:GO:0031475; C:GO:0031476; C:GO:00…	P:protein phosphorylation; P:centriole replication; P:sensory perception of sound; P:sensory perception of smell; P:metarhodopsin inactivation; P:regulation of light-activated channel activity; P:adaptation of rhodopsin mediated signaling; P:calcium-mediated signaling; P:actin filament-based movement; P:salivary gland cell autophagic cell death; P:rhabdomere development; P:muscle cell cellular ho…			G3DSA:1.10.238.10 (GENE3D); G3DSA:1.10.238.10 (GENE3D); IPR002048 (PFAM); PTHR23050 (PANTHER); IPR039030 (PTHR23050:PANTHER); IPR018247 (PROSITE_PATTERNS); IPR018247 (PROSITE_PATTERNS); IPR018247 (PROSITE_PATTERNS); IPR018247 (PROSITE_PATTERNS); IPR002048 (PROSITE_PROFILES); IPR002048 (PROSITE_PROFILES); IPR002048 (PROSITE_PROFILES); IPR002048 (PROSITE_PROFILES); IPR002048 (CDD); IPR002048 (CDD);…	P:GO:0019722; F:GO:0005509	P:calcium-mediated signaling; F:calcium ion binding
EVSurface		DN8957_c0_g1_i1_66134	681	53507	16	24	17	13	10	1.31		expressed conserved protein	TRUE	[INTERPRO, BLASTED]	407	15	8.87154e-75	55.45						mobidb-lite (MOBIDB_LITE); mobidb-lite (MOBIDB_LITE); mobidb-lite (MOBIDB_LITE); mobidb-lite (MOBIDB_LITE); mobidb-lite (MOBIDB_LITE); mobidb-lite (MOBIDB_LITE); mobidb-lite (MOBIDB_LITE)	no GO terms	no GO terms
EVSurface		DN10354_c0_g1_i1_3720	299	133308	15.3333	24	9	23	9	0.24		paramyosin	TRUE	[INTERPRO, BLASTED, MAPPED, ANNOTATED]	863	20	0	95.58	5	F:GO:0003774; C:GO:0005576; C:GO:0016459; C:GO:0030016; C:GO:0032982	F:motor activity; C:extracellular region; C:myosin complex; C:myofibril; C:myosin filament	EC:3.6.1.15	Nucleoside-triphosphate phosphatase	Coil (COILS); Coil (COILS); Coil (COILS); Coil (COILS); Coil (COILS); Coil (COILS); IPR002928 (PFAM); G3DSA:1.20.5.340 (GENE3D); IPR042180 (G3DSA:1.20.5.GENE3D); PTHR22988:SF70 (PANTHER); PTHR22988 (PANTHER); SSF90257 (SUPERFAMILY); SSF90257 (SUPERFAMILY); SSF90257 (SUPERFAMILY); SSF57997 (SUPERFAMILY)	F:GO:0003774; C:GO:0016459	F:motor activity; C:myosin complex
EVSurface		DN8156_c0_g1_i2_52113	212	178345	15	13	3	13	3	0.06		Serine/threonine kinase	TRUE	[INTERPRO, BLASTED, MAPPED, ANNOTATED]	1200	20	0	69.66	5	P:GO:0006468; P:GO:0035556; F:GO:0004674; F:GO:0005524; F:GO:0046872	P:protein phosphorylation; P:intracellular signal transduction; F:protein serine/threonine kinase activity; F:ATP binding; F:metal ion binding	EC:2.7.11	Transferring phosphorus-containing groups	Coil (COILS); Coil (COILS); Coil (COILS); Coil (COILS); Coil (COILS); G3DSA:3.30.60.20 (GENE3D); IPR000719 (PFAM); mobidb-lite (MOBIDB_LITE); mobidb-lite (MOBIDB_LITE); mobidb-lite (MOBIDB_LITE); mobidb-lite (MOBIDB_LITE); IPR029875 (PTHR22988:PANTHER); PTHR22988 (PANTHER); IPR029875 (PTHR22988:PANTHER); PTHR22988 (PANTHER); IPR017441 (PROSITE_PATTERNS); IPR008271 (PROSITE_PATTERNS); IPR000719 (P…	P:GO:0006468; P:GO:0035556; F:GO:0004672; F:GO:0004674; F:GO:0005524	P:protein phosphorylation; P:intracellular signal transduction; F:protein kinase activity; F:protein serine/threonine kinase activity; F:ATP binding
EVSurface		DN7152_c0_g1_i2_8970	456	70198	14.6667	16	10	13	7	0.51		protein kinase C and casein kinase substrate in	TRUE	[INTERPRO, BLASTED, MAPPED, ANNOTATED]	474	20	0	83.52	3	P:GO:0016310; F:GO:0016301; C:GO:0016021	P:phosphorylation; F:kinase activity; C:integral component of membrane			Coil (COILS); IPR001452 (PRINTS); IPR027267 (G3DSA:1.20.1270.GENE3D); IPR001060 (PFAM); G3DSA:2.30.30.40 (GENE3D); IPR001452 (PFAM); mobidb-lite (MOBIDB_LITE); mobidb-lite (MOBIDB_LITE); mobidb-lite (MOBIDB_LITE); mobidb-lite (MOBIDB_LITE); PTHR23065 (PANTHER); PTHR23065:SF11 (PANTHER); IPR001452 (PROSITE_PROFILES); IPR031160 (PROSITE_PROFILES); cd11843 (CDD); IPR027267 (SUPERFAMILY); IPR036028 (…	F:GO:0005515	F:protein binding
EVSurface		DN118_c0_g1_i1_52814	205	21882	14.3333	27	7	5	3	0.77	3	tegumental protein	TRUE	[INTERPRO, BLASTED, MAPPED, ANNOTATED]	99	20	6.72392e-63	80.3	2	P:GO:0007017; C:GO:0030286	P:microtubule-based process; C:dynein complex			IPR001372 (PFAM); IPR037177 (G3DSA:3.30.740.GENE3D); IPR037177 (SUPERFAMILY)	P:GO:0007017; C:GO:0030286	P:microtubule-based process; C:dynein complex
EVSurface		DN7852_c0_g1_i1_1626	189	66578	14.3333	19	7	14	5	0.4		lysyl oxidase	TRUE	[INTERPRO, BLASTED, MAPPED, ANNOTATED]	508	20	0	77.89	6	P:GO:0006897; P:GO:0055114; F:GO:0005044; F:GO:0005507; F:GO:0016641; C:GO:0016020	P:endocytosis; P:oxidation-reduction process; F:scavenger receptor activity; F:copper ion binding; F:oxidoreductase activity, acting on the CH-NH2 group of donors, oxygen as acceptor; C:membrane			IPR001190 (PRINTS); IPR001695 (PRINTS); IPR036772 (G3DSA:3.10.250.GENE3D); IPR001695 (PFAM); IPR036772 (G3DSA:3.10.250.GENE3D); IPR001190 (PFAM); PTHR45817:SF4 (PANTHER); PTHR45817 (PANTHER); PTHR45817:SF4 (PANTHER); IPR001190 (PROSITE_PROFILES); IPR001190 (PROSITE_PROFILES); IPR036772 (SUPERFAMILY); IPR036772 (SUPERFAMILY)	P:GO:0055114; F:GO:0005044; F:GO:0005507; F:GO:0016641; C:GO:0016020	P:oxidation-reduction process; F:scavenger receptor activity; F:copper ion binding; F:oxidoreductase activity, acting on the CH-NH2 group of donors, oxygen as acceptor; C:membrane
EVSurface		DN11218_c0_g1_i1_75075	123	52918	14	17	5	15	5	0.35		Phosphoglycerate kinase	TRUE	[INTERPRO, BLASTED, MAPPED, ANNOTATED]	415	20	0	88.65	7	P:GO:0006094; P:GO:0006096; P:GO:1903862; F:GO:0004618; F:GO:0005524; F:GO:0043531; C:GO:0005829	P:gluconeogenesis; P:glycolytic process; P:positive regulation of oxidative phosphorylation; F:phosphoglycerate kinase activity; F:ATP binding; F:ADP binding; C:cytosol	EC:2.7.2.3	Phosphoglycerate kinase	IPR001576 (PRINTS); IPR015824 (G3DSA:3.40.50.GENE3D); IPR001576 (PIRSF); IPR015824 (G3DSA:3.40.50.GENE3D); IPR001576 (PFAM); IPR015824 (G3DSA:3.40.50.GENE3D); IPR001576 (PANTHER); PTHR11406:SF0 (PANTHER); IPR015911 (PROSITE_PATTERNS); IPR001576 (HAMAP); IPR001576 (CDD); IPR036043 (SUPERFAMILY)	P:GO:0006096; F:GO:0004618	P:glycolytic process; F:phosphoglycerate kinase activity
EVSurface		DN9937_c0_g1_i1_30096	505	134250	14	28	11	23	9	0.3		Kinesin heavy chain	TRUE	[INTERPRO, BLASTED, MAPPED, ANNOTATED]	985	20	0	81.96	5	P:GO:0007018; F:GO:0003777; F:GO:0005524; F:GO:0008017; C:GO:0005874	P:microtubule-based movement; F:microtubule motor activity; F:ATP binding; F:microtubule binding; C:microtubule	EC:3.6.1.15	Nucleoside-triphosphate phosphatase	Coil (COILS); Coil (COILS); Coil (COILS); Coil (COILS); Coil (COILS); Coil (COILS); Coil (COILS); Coil (COILS); Coil (COILS); IPR001752 (PRINTS); IPR036961 (G3DSA:3.40.850.GENE3D); IPR001752 (PFAM); mobidb-lite (MOBIDB_LITE); mobidb-lite (MOBIDB_LITE); mobidb-lite (MOBIDB_LITE); PTHR47968 (PANTHER); PTHR47968:SF31 (PANTHER); IPR019821 (PROSITE_PATTERNS); IPR001752 (PROSITE_PROFILES); cd01369 (CDD…	P:GO:0007018; F:GO:0003777; F:GO:0005524; F:GO:0008017	P:microtubule-based movement; F:microtubule motor activity; F:ATP binding; F:microtubule binding
EVSurface		DN10335_c1_g1_i3_29500	57	244857	13.6667	22	3	21	3	0.04		hemicentin 1	TRUE	[INTERPRO, BLASTED, MAPPED, ANNOTATED]	2123	20	0	77.4	2	F:GO:0003824; F:GO:0005509	F:catalytic activity; F:calcium ion binding			Coil (COILS); PR01705 (PRINTS); IPR013783 (G3DSA:2.60.40.GENE3D); G3DSA:2.10.25.10 (GENE3D); IPR013098 (PFAM); G3DSA:2.10.25.10 (GENE3D); IPR013783 (G3DSA:2.60.40.GENE3D); IPR013783 (G3DSA:2.60.40.GENE3D); IPR013783 (G3DSA:2.60.40.GENE3D); G3DSA:2.10.25.10 (GENE3D); IPR013783 (G3DSA:2.60.40.GENE3D); PF13927 (PFAM); G3DSA:2.10.25.10 (GENE3D); IPR013783 (G3DSA:2.60.40.GENE3D); IPR001881 (PFAM); IPR…	F:GO:0005509	F:calcium ion binding
EVSurface		DN10361_c0_g1_i1_17166	261	95656	13.6667	16	8	16	8	0.31		transitional endoplasmic reticulum atpase	TRUE	[INTERPRO, BLASTED, MAPPED, ANNOTATED]	800	20	0	94.32	3	P:GO:0051301; F:GO:0005524; F:GO:0016787	P:cell division; F:ATP binding; F:hydrolase activity			Coil (COILS); G3DSA:2.40.40.20 (GENE3D); IPR005938 (TIGRFAM); G3DSA:1.10.8.60 (GENE3D); IPR004201 (PFAM); IPR015415 (PFAM); G3DSA:3.10.330.10 (GENE3D); G3DSA:3.40.50.300 (GENE3D); G3DSA:1.10.8.60 (GENE3D); IPR041569 (PFAM); IPR003338 (PFAM); IPR003959 (PFAM); G3DSA:3.40.50.300 (GENE3D); mobidb-lite (MOBIDB_LITE); mobidb-lite (MOBIDB_LITE); PTHR23077:SF69 (PANTHER); PTHR23077 (PANTHER); IPR003960 …	F:GO:0005524; F:GO:0016787; F:GO:0016887	F:ATP binding; F:hydrolase activity; F:ATPase activity
EVSurface		DN11247_c1_g1_i4_75101	231	147344	13.6667	18	4	17	4	0.09		ubiquitin modifier activating enzyme 1	TRUE	[INTERPRO, BLASTED, MAPPED, ANNOTATED]	1059	20	0	82.58	3	P:GO:0006464; F:GO:0005524; F:GO:0008641	P:cellular protein modification process; F:ATP binding; F:ubiquitin-like modifier activating enzyme activity			Coil (COILS); IPR000011 (PRINTS); G3DSA:3.40.50.12550 (GENE3D); IPR000594 (PFAM); IPR038252 (G3DSA:3.10.290.GENE3D); IPR018965 (PFAM); IPR000594 (PFAM); IPR019572 (PFAM); IPR042449 (G3DSA:3.50.50.GENE3D); IPR032420 (PFAM); IPR042063 (G3DSA:1.10.10.GENE3D); G3DSA:3.40.50.720 (GENE3D); IPR018075 (TIGRFAM); IPR042302 (G3DSA:2.40.30.GENE3D); IPR032418 (PFAM); mobidb-lite (MOBIDB_LITE); PTHR10953:SF19…	P:GO:0006464; F:GO:0008641	P:cellular protein modification process; F:ubiquitin-like modifier activating enzyme activity
EVSurface		DN4767_c0_g1_i1_33895	137	90928	13.6667	19	9	17	8	0.33		expressed conserved protein	TRUE	[INTERPRO, BLASTED]	746	18	0	54.78						mobidb-lite (MOBIDB_LITE); mobidb-lite (MOBIDB_LITE); mobidb-lite (MOBIDB_LITE); mobidb-lite (MOBIDB_LITE); mobidb-lite (MOBIDB_LITE); mobidb-lite (MOBIDB_LITE); mobidb-lite (MOBIDB_LITE); mobidb-lite (MOBIDB_LITE); mobidb-lite (MOBIDB_LITE); mobidb-lite (MOBIDB_LITE); mobidb-lite (MOBIDB_LITE); mobidb-lite (MOBIDB_LITE); mobidb-lite (MOBIDB_LITE); mobidb-lite (MOBIDB_LITE); mobidb-lite (MOBIDB_L…	no GO terms	no GO terms
EVSurface		DN9865_c0_g1_i1_63028	363	48202	13.3333	22	9	12	5	0.59		hypothetical transcript	TRUE	[INTERPRO, BLASTED, MAPPED, ANNOTATED]	344	20	0	76.67	3	P:GO:0030833; F:GO:0043167; F:GO:0051015	P:regulation of actin filament polymerization; F:ion binding; F:actin filament binding			IPR007122 (PRINTS); IPR029006 (G3DSA:3.40.20.GENE3D); IPR029006 (G3DSA:3.40.20.GENE3D); IPR007123 (PFAM); IPR029006 (G3DSA:3.40.20.GENE3D); IPR007122 (PANTHER); PTHR11977:SF109 (PANTHER); SSF55753 (SUPERFAMILY); SSF55753 (SUPERFAMILY); SSF55753 (SUPERFAMILY)	F:GO:0051015	F:actin filament binding
EVSurface		DN9938_c0_g3_i1_30142	314	89383	13.3333	23	9	21	8	0.33		Spectrin alpha actinin	TRUE	[INTERPRO, BLASTED, MAPPED, ANNOTATED]	789	20	0	59.87	3	F:GO:0000166; F:GO:0003779; F:GO:0043167	F:nucleotide binding; F:actin binding; F:ion binding			Coil (COILS); Coil (COILS); Coil (COILS); Coil (COILS); Coil (COILS); Coil (COILS); Coil (COILS); G3DSA:1.20.58.1940 (GENE3D); IPR002017 (PFAM); G3DSA:1.20.58.1940 (GENE3D); mobidb-lite (MOBIDB_LITE); mobidb-lite (MOBIDB_LITE); cd00176 (CDD); SSF46966 (SUPERFAMILY); SSF46966 (SUPERFAMILY); SSF46966 (SUPERFAMILY)	F:GO:0005515	F:protein binding
EVSurface		DN10391_c0_g1_i1_17083	119	84165	13	17	4	15	4	0.17		PC3-like endoprotease variant B	TRUE	[INTERPRO, BLASTED, MAPPED, ANNOTATED]	696	20	0	66.93	2	P:GO:0006508; F:GO:0004252	P:proteolysis; F:serine-type endopeptidase activity	EC:3.4.21.73; EC:3.4.24.7; EC:3.4.21.71; EC:3.4.24.3; EC:3.4.21.34; EC:3.4.21.78; EC:3.4.21.75; EC:3.4.21.26; EC:3.4.21.27; EC:3.4.21.68; EC:3.4.21.69; EC:3.4.24.34; EC:3.4.21.41; EC:3.4.21.83; EC:3.4.21.88; EC:3.4.21.45; EC:3.4.21.89; EC:3.4.21.42; EC:3.4.19.1; EC:3.4.21.43; EC:3.4.21.87; EC:3.4.21.38; EC:3.4.21.35; EC:3.4.21.79; EC:3.4.21.36; EC:3.4.21.102; EC:3.4.21.39; EC:3.4.21; EC:3.4.21.4;…	U-plasminogen activator; Interstitial collagenase; Pancreatic elastase II; Microbial collagenase; Plasma kallikrein; Granzyme A; Furin; Prolyl oligopeptidase; Coagulation factor XIa; T-plasminogen activator; Protein C (activated); Neutrophil collagenase; Complement subcomponent C1r; Oligopeptidase B; Repressor LexA; Complement factor I; Signal peptidase I; Complement subcomponent C1s; Acylaminoac…	IPR015500 (PRINTS); IPR002884 (PFAM); IPR000209 (PFAM); IPR008979 (G3DSA:2.60.120.GENE3D); IPR036852 (G3DSA:3.40.50.GENE3D); PTHR42884 (PANTHER); PTHR42884:SF10 (PANTHER); IPR023828 (PROSITE_PATTERNS); PS51892 (PROSITE_PROFILES); IPR002884 (PROSITE_PROFILES); IPR034182 (CDD); IPR036852 (SUPERFAMILY); IPR008979 (SUPERFAMILY)	P:GO:0006508; F:GO:0004252; F:GO:0008236	P:proteolysis; F:serine-type endopeptidase activity; F:serine-type peptidase activity
EVSurface		DN11844_c0_g1_i15_55732	411	55567	13	16	9	12	5	0.5		annexin	TRUE	[INTERPRO, BLASTED, MAPPED, ANNOTATED]	460	20	0	68.6	1	F:GO:0043167	F:ion binding			IPR001464 (PRINTS); IPR037104 (G3DSA:1.10.220.GENE3D); IPR037104 (G3DSA:1.10.220.GENE3D); IPR018502 (PFAM); IPR037104 (G3DSA:1.10.220.GENE3D); IPR037104 (G3DSA:1.10.220.GENE3D); mobidb-lite (MOBIDB_LITE); mobidb-lite (MOBIDB_LITE); PTHR10502 (PANTHER); PTHR10502:SF226 (PANTHER); IPR018502 (PROSITE_PROFILES); IPR018502 (PROSITE_PROFILES); IPR018502 (PROSITE_PROFILES); IPR018502 (PROSITE_PROFILES);…	F:GO:0005509; F:GO:0005544	F:calcium ion binding; F:calcium-dependent phospholipid binding
EVSurface		DN8245_c0_g1_i1_16127	408	88233	12.3333	16	8	13	5	0.34		T-cell immunomodulatory protein	TRUE	[INTERPRO, BLASTED, MAPPED, ANNOTATED]	200	20	3.19279e-115	76.83	1	C:GO:0016021	C:integral component of membrane			IPR024881 (PANTHER)	no GO terms	no GO terms
EVSurface		DN11165_c0_g1_i1_24177	491	42395	11.6667	16	8	15	7	0.82		aldo keto reductase family 1 member B4	TRUE	[INTERPRO, BLASTED, MAPPED, ANNOTATED]	316	20	7.19063e-172	79.25	3	P:GO:0055114; F:GO:0016491; C:GO:0016021	P:oxidation-reduction process; F:oxidoreductase activity; C:integral component of membrane			IPR020471 (PRINTS); IPR036812 (G3DSA:3.20.20.GENE3D); IPR020471 (PIRSF); IPR023210 (PFAM); PTHR11732:SF482 (PANTHER); IPR020471 (PANTHER); IPR018170 (PROSITE_PATTERNS); IPR018170 (PROSITE_PATTERNS); IPR023210 (CDD); IPR036812 (SUPERFAMILY)	P:GO:0055114; F:GO:0016491	P:oxidation-reduction process; F:oxidoreductase activity
EVSurface		DN1602_c0_g1_i1_69974	192	78036	11.6667	13	3	12	3	0.13		Putative actin-interacting protein 1	TRUE	[INTERPRO, BLASTED]	617	20	0	76.43						IPR015943 (G3DSA:2.130.10.GENE3D); IPR001680 (PFAM); IPR015943 (G3DSA:2.130.10.GENE3D); PTHR19856 (PANTHER); PTHR19856:SF0 (PANTHER); IPR019775 (PROSITE_PATTERNS); IPR001680 (PROSITE_PROFILES); IPR001680 (PROSITE_PROFILES); IPR001680 (PROSITE_PROFILES); IPR001680 (PROSITE_PROFILES); IPR017986 (PROSITE_PROFILES); IPR001680 (PROSITE_PROFILES); cd00200 (CDD); IPR036322 (SUPERFAMILY); SSF69322 (SUPER…	F:GO:0005515	F:protein binding
EVSurface		DN8932_c0_g1_i2_2337	268	77699	11.3333	13	8	11	6	0.34		NADP-dependent malic enzyme	TRUE	[INTERPRO, BLASTED, MAPPED, ANNOTATED]	574	20	0	80.39	4	P:GO:0055114; F:GO:0004471; F:GO:0046872; F:GO:0051287	P:oxidation-reduction process; F:malate dehydrogenase (decarboxylating) (NAD+) activity; F:metal ion binding; F:NAD binding	EC:1.1.1.38; EC:1.1.1.39	Malate dehydrogenase (oxaloacetate-decarboxylating); Malate dehydrogenase (decarboxylating)	IPR001891 (PRINTS); IPR001891 (PIRSF); IPR012301 (PFAM); G3DSA:3.40.50.720 (GENE3D); IPR012302 (PFAM); IPR037062 (G3DSA:3.40.50.GENE3D); PTHR23406 (PANTHER); PTHR23406:SF34 (PANTHER); IPR015884 (PROSITE_PATTERNS); IPR036291 (SUPERFAMILY); SSF53223 (SUPERFAMILY)	P:GO:0055114; F:GO:0004470; F:GO:0004471; F:GO:0051287	P:oxidation-reduction process; F:malic enzyme activity; F:malate dehydrogenase (decarboxylating) (NAD+) activity; F:NAD binding
EVSurface		DN9891_c0_g1_i3_12239	194	70226	11.3333	9	3	8	3	0.15		Signal transducing adaptor molecule	TRUE	[INTERPRO, BLASTED, MAPPED]	382	20	5.08943e-146	63	3	P:GO:0006886; C:GO:0016020; C:GO:0016021	P:intracellular protein transport; C:membrane; C:integral component of membrane			IPR001452 (PRINTS); PR00499 (PRINTS); IPR001452 (PFAM); IPR003903 (PFAM); G3DSA:2.30.30.40 (GENE3D); mobidb-lite (MOBIDB_LITE); mobidb-lite (MOBIDB_LITE); mobidb-lite (MOBIDB_LITE); mobidb-lite (MOBIDB_LITE); mobidb-lite (MOBIDB_LITE); mobidb-lite (MOBIDB_LITE); PTHR45929 (PANTHER); IPR003903 (PROSITE_PROFILES); IPR001452 (PROSITE_PROFILES); IPR036028 (SUPERFAMILY)	F:GO:0005515	F:protein binding
EVSurface		DN10702_c1_g1_i7_35861	341	77199	11	15	9	11	5	0.34		ATP binding cassette subfamily B MDR:TAP	TRUE	[INTERPRO, BLASTED, MAPPED, ANNOTATED]	302	20	2.86858e-140	70.31	5	P:GO:0055085; F:GO:0005524; F:GO:0016887; F:GO:0042626; C:GO:0016021	P:transmembrane transport; F:ATP binding; F:ATPase activity; F:ATPase-coupled transmembrane transporter activity; C:integral component of membrane	EC:3.6.1.3; EC:3.6.1.15	Adenosinetriphosphatase; Nucleoside-triphosphate phosphatase	IPR036640 (G3DSA:1.20.1560.GENE3D); IPR003439 (PFAM); IPR011527 (PFAM); IPR036640 (G3DSA:1.20.1560.GENE3D); G3DSA:3.40.50.300 (GENE3D); IPR039421 (PANTHER); PTHR24221:SF501 (PANTHER); IPR011527 (PROSITE_PROFILES); cd18578 (CDD); IPR027417 (SUPERFAMILY); IPR036640 (SUPERFAMILY)	P:GO:0055085; F:GO:0005524; F:GO:0042626; C:GO:0016021	P:transmembrane transport; F:ATP binding; F:ATPase-coupled transmembrane transporter activity; C:integral component of membrane
EVSurface		DN10794_c0_g1_i8_9783	296	78883	11	10	7	5	3	0.18		unnamed protein product, partial	TRUE	[INTERPRO, BLASTED, MAPPED]	215	3	2.12906e-15	52.08	2	C:GO:0016020; C:GO:0016021	C:membrane; C:integral component of membrane			mobidb-lite (MOBIDB_LITE)	no GO terms	no GO terms
EVSurface		DN11256_c0_g1_i8_23166	269	49195	11	15	9	10	7	0.68		Annexin A13 (Annexin XIII)	TRUE	[INTERPRO, BLASTED, MAPPED, ANNOTATED]	349	20	0	76.04	3	F:GO:0005509; F:GO:0005544; F:GO:0016817	F:calcium ion binding; F:calcium-dependent phospholipid binding; F:hydrolase activity, acting on acid anhydrides			IPR001464 (PRINTS); IPR037104 (G3DSA:1.10.220.GENE3D); IPR018502 (PFAM); IPR037104 (G3DSA:1.10.220.GENE3D); IPR037104 (G3DSA:1.10.220.GENE3D); PTHR10502 (PANTHER); IPR018502 (PROSITE_PROFILES); IPR018502 (PROSITE_PROFILES); IPR018502 (PROSITE_PROFILES); IPR037104 (SUPERFAMILY)	F:GO:0005509; F:GO:0005544	F:calcium ion binding; F:calcium-dependent phospholipid binding
EVSurface		DN11332_c0_g1_i2_13563	74	76218	11	16	3	11	3	0.13		serine:threonine protein kinase PAK 3	TRUE	[INTERPRO, BLASTED, MAPPED, ANNOTATED]	494	20	0	80.79	4	P:GO:0006468; F:GO:0004674; F:GO:0005524; C:GO:0016021	P:protein phosphorylation; F:protein serine/threonine kinase activity; F:ATP binding; C:integral component of membrane	EC:2.7.11	Transferring phosphorus-containing groups	IPR000095 (PFAM); G3DSA:1.10.510.10 (GENE3D); G3DSA:3.30.200.20 (GENE3D); IPR036936 (G3DSA:3.90.810.GENE3D); IPR000719 (PFAM); mobidb-lite (MOBIDB_LITE); mobidb-lite (MOBIDB_LITE); mobidb-lite (MOBIDB_LITE); PTHR48015:SF35 (PANTHER); PTHR48015 (PANTHER); PTHR48015:SF35 (PANTHER); IPR008271 (PROSITE_PATTERNS); IPR017441 (PROSITE_PATTERNS); IPR000719 (PROSITE_PROFILES); cd06614 (CDD); IPR011009 (SU…	P:GO:0006468; F:GO:0004672; F:GO:0005524	P:protein phosphorylation; F:protein kinase activity; F:ATP binding
EVSurface		DN9599_c0_g3_i1_14720	232	38737	11	14	5	12	4	0.51		syndecan binding protein syntenin	TRUE	[INTERPRO, BLASTED, MAPPED, ANNOTATED]	301	20	1.62914e-127	69.38	1	C:GO:0110165	C:cellular anatomical entity			IPR036034 (G3DSA:2.30.42.GENE3D); IPR001478 (PFAM); IPR036034 (G3DSA:2.30.42.GENE3D); PTHR12345 (PANTHER); PTHR12345:SF3 (PANTHER); IPR001478 (PROSITE_PROFILES); IPR001478 (PROSITE_PROFILES); cd00992 (CDD); cd00992 (CDD); IPR036034 (SUPERFAMILY); IPR036034 (SUPERFAMILY)	F:GO:0005515	F:protein binding
EVSurface		DN10171_c0_g1_i2_35064	288	42753	10.6667	18	8	14	8	0.81		expressed conserved protein	TRUE	[INTERPRO, BLASTED]	336	2	0.000149664	48.39						mobidb-lite (MOBIDB_LITE); mobidb-lite (MOBIDB_LITE); mobidb-lite (MOBIDB_LITE); mobidb-lite (MOBIDB_LITE); mobidb-lite (MOBIDB_LITE)	no GO terms	no GO terms
EVSurface		DN10181_c0_g1_i1_47181	128	56433	10.6667	11	2	9	2	0.12		cytosolic malate dehydrogenase	TRUE	[INTERPRO, BLASTED, MAPPED, ANNOTATED]	332	20	0	88.39	8	P:GO:0005975; P:GO:0006099; P:GO:0006108; P:GO:0006734; F:GO:0030060; F:GO:0042803; F:GO:0051287; C:GO:0005737	P:carbohydrate metabolic process; P:tricarboxylic acid cycle; P:malate metabolic process; P:NADH metabolic process; F:L-malate dehydrogenase activity; F:protein homodimerization activity; F:NAD binding; C:cytoplasm	EC:1.1.1.37	Malate dehydrogenase	IPR022383 (PFAM); G3DSA:3.40.50.720 (GENE3D); IPR010945 (TIGRFAM); IPR011274 (TIGRFAM); IPR001236 (PFAM); IPR015955 (G3DSA:3.90.110.GENE3D); IPR001557 (PIRSF); IPR010945 (PANTHER); IPR001252 (PROSITE_PATTERNS); IPR011274 (CDD); IPR036291 (SUPERFAMILY); IPR015955 (SUPERFAMILY)	P:GO:0005975; P:GO:0006108; P:GO:0019752; P:GO:0055114; F:GO:0003824; F:GO:0016491; F:GO:0016615; F:GO:0016616; F:GO:0030060	P:carbohydrate metabolic process; P:malate metabolic process; P:carboxylic acid metabolic process; P:oxidation-reduction process; F:catalytic activity; F:oxidoreductase activity; F:malate dehydrogenase activity; F:oxidoreductase activity, acting on the CH-OH group of donors, NAD or NADP as acceptor; F:L-malate dehydrogenase activity
EVSurface		DN8296_c0_g1_i1_28547	147	25536	10.6667	14	7	6	4	1.09		Uncharacterised
EVSurface		DN10752_c0_g1_i1_35881	273	31512	10.3333	13	6	8	4	0.82		carbonyl reductase 1	TRUE	[INTERPRO, BLASTED]	262	20	6.0171e-153	82.6						IPR002347 (PRINTS); IPR002347 (PRINTS); G3DSA:3.40.50.720 (GENE3D); IPR002347 (PFAM); PTHR43963 (PANTHER); PTHR43963:SF4 (PANTHER); cd05324 (CDD); IPR036291 (SUPERFAMILY)	P:GO:0055114	P:oxidation-reduction process
EVSurface		DN6177_c0_g1_i1_38518	139	53381	10.3333	6	3	5	3	0.2		thymidine phosphorylase	TRUE	[INTERPRO, BLASTED, MAPPED, ANNOTATED]	457	20	0	73.24	6	P:GO:0006206; P:GO:0006213; F:GO:0004645; F:GO:0009032; F:GO:0016154; C:GO:0016020	P:pyrimidine nucleobase metabolic process; P:pyrimidine nucleoside metabolic process; F:1,4-alpha-oligoglucan phosphorylase activity; F:thymidine phosphorylase activity; F:pyrimidine-nucleoside phosphorylase activity; C:membrane	EC:2.4.1.1; EC:2.4.2.2; EC:2.4.2.4	Glycogen phosphorylase; Pyrimidine-nucleoside phosphorylase; Thymidine phosphorylase	IPR000053 (PIRSF); IPR035902 (G3DSA:3.40.1030.GENE3D); IPR000312 (PFAM); IPR018090 (TIGRFAM); IPR013102 (PFAM); IPR036320 (G3DSA:1.20.970.GENE3D); IPR036566 (G3DSA:3.90.1170.GENE3D); IPR017459 (PFAM); IPR000053 (PANTHER); IPR017872 (PROSITE_PATTERNS); IPR036566 (SUPERFAMILY); IPR036320 (SUPERFAMILY); IPR035902 (SUPERFAMILY)	P:GO:0006206; P:GO:0006213; F:GO:0004645; F:GO:0016154; F:GO:0016757; F:GO:0016763	P:pyrimidine nucleobase metabolic process; P:pyrimidine nucleoside metabolic process; F:1,4-alpha-oligoglucan phosphorylase activity; F:pyrimidine-nucleoside phosphorylase activity; F:transferase activity, transferring glycosyl groups; F:transferase activity, transferring pentosyl groups
EVSurface		DN10463_c1_g1_i3_34416	379	126944	10	14	9	12	7	0.26		protein AHNAK2	TRUE	[INTERPRO, BLASTED, MAPPED]	887	20	0	58.32	4	P:GO:0043484; C:GO:0005634; C:GO:0005737; C:GO:0030315	P:regulation of RNA splicing; C:nucleus; C:cytoplasm; C:T-tubule			mobidb-lite (MOBIDB_LITE); mobidb-lite (MOBIDB_LITE); mobidb-lite (MOBIDB_LITE); mobidb-lite (MOBIDB_LITE); mobidb-lite (MOBIDB_LITE); mobidb-lite (MOBIDB_LITE); mobidb-lite (MOBIDB_LITE); mobidb-lite (MOBIDB_LITE); mobidb-lite (MOBIDB_LITE); mobidb-lite (MOBIDB_LITE); PTHR23348 (PANTHER)	no GO terms	no GO terms
EVSurface	Immunomodulators	DN11727_c0_g1_i2_61275	294	92115	10	14	3	13	3	0.11		family C2 unassigned peptidase (C02 family)	TRUE	[INTERPRO, BLASTED, MAPPED, ANNOTATED]	769	20	0	74.94	6	P:GO:0006508; P:GO:0008033; P:GO:0090501; F:GO:0004198; F:GO:0004540; F:GO:0005509	P:proteolysis; P:tRNA processing; P:RNA phosphodiester bond hydrolysis; F:calcium-dependent cysteine-type endopeptidase activity; F:ribonuclease activity; F:calcium ion binding	EC:3.4.22; EC:3.4.22.1; EC:3.4.99; EC:3.4.22.41; EC:3.4.22.40; EC:3.4.22.34; EC:3.4.22.8; EC:3.4.22.28; EC:3.4.22.16; EC:3.4.22.27; EC:3.4.22.38; EC:3.4.22.15; EC:3.4.22.14	Acting on peptide bonds (peptidases); Cathepsin B; Acting on peptide bonds (peptidases); Cathepsin F; Bleomycin hydrolase; Legumain; Clostripain; Picornain 3C; Cathepsin H; Cathepsin S; Cathepsin K; Cathepsin L; Actinidain	IPR022684 (PRINTS); IPR001300 (PFAM); G3DSA:2.60.120.380 (GENE3D); IPR022682 (PFAM); G3DSA:1.10.238.10 (GENE3D); G3DSA:3.90.70.10 (GENE3D); PTHR10183 (PANTHER); PTHR10183:SF396 (PANTHER); IPR000169 (PROSITE_PATTERNS); IPR018247 (PROSITE_PATTERNS); IPR002048 (PROSITE_PROFILES); IPR002048 (PROSITE_PROFILES); IPR001300 (PROSITE_PROFILES); IPR002048 (PROSITE_PROFILES); IPR033883 (CDD); IPR001300 (CDD…	P:GO:0006508; F:GO:0004198; F:GO:0005509	P:proteolysis; F:calcium-dependent cysteine-type endopeptidase activity; F:calcium ion binding
EVSurface		DN12296_c2_g2_i8_68465	406	44731	10	15	11	12	9	1.19		Annexin A5	TRUE	[INTERPRO, BLASTED, MAPPED, ANNOTATED]	331	20	0	73.49	2	F:GO:0005509; F:GO:0005544	F:calcium ion binding; F:calcium-dependent phospholipid binding			IPR001464 (PRINTS); IPR037104 (G3DSA:1.10.220.GENE3D); IPR037104 (G3DSA:1.10.220.GENE3D); IPR037104 (G3DSA:1.10.220.GENE3D); IPR037104 (G3DSA:1.10.220.GENE3D); IPR018502 (PFAM); PTHR10502 (PANTHER); PTHR10502:SF102 (PANTHER); IPR018252 (PROSITE_PATTERNS); IPR018252 (PROSITE_PATTERNS); IPR018502 (PROSITE_PROFILES); IPR018502 (PROSITE_PROFILES); IPR018502 (PROSITE_PROFILES); IPR018502 (PROSITE_PROF…	F:GO:0005509; F:GO:0005544	F:calcium ion binding; F:calcium-dependent phospholipid binding
EVSurface		DN15114_c0_g1_i1_67613	195	56972	10	11	7	10	6	0.4		expressed conserved protein	TRUE	[INTERPRO, BLASTED]	456	20	1.89209e-50	55.47						Coil (COILS); mobidb-lite (MOBIDB_LITE); mobidb-lite (MOBIDB_LITE); mobidb-lite (MOBIDB_LITE); mobidb-lite (MOBIDB_LITE); mobidb-lite (MOBIDB_LITE)	no GO terms	no GO terms
EVSurface		DN8196_c0_g1_i1_27920	189	36154	10	9	5	5	3	0.42		hydroxyacylglutathione hydrolase	TRUE	[INTERPRO, BLASTED, MAPPED, ANNOTATED]	283	20	1.32376e-154	76.51	2	P:GO:0019243; F:GO:0004416	P:methylglyoxal catabolic process to D-lactate via S-lactoyl-glutathione; F:hydroxyacylglutathione hydrolase activity	EC:3.1.2.6	Hydroxyacylglutathione hydrolase	IPR001279 (PFAM); IPR017782 (PIRSF); IPR036866 (G3DSA:3.60.15.GENE3D); IPR032282 (PFAM); IPR017782 (TIGRFAM); PTHR11935 (PANTHER); IPR017782 (HAMAP); IPR035680 (CDD); IPR036866 (SUPERFAMILY)	P:GO:0019243; F:GO:0004416	P:methylglyoxal catabolic process to D-lactate via S-lactoyl-glutathione; F:hydroxyacylglutathione hydrolase activity
EVSurface		DN9938_c0_g1_i1_30141	115	71996	10	8	3	8	3	0.14		Spectrin alpha actinin	TRUE	[INTERPRO, BLASTED, MAPPED, ANNOTATED]	633	20	0	64.6	3	F:GO:0003779; F:GO:0005524; F:GO:0046872	F:actin binding; F:ATP binding; F:metal ion binding			Coil (COILS); Coil (COILS); G3DSA:2.30.30.40 (GENE3D); G3DSA:1.20.58.1940 (GENE3D); G3DSA:1.20.58.60 (GENE3D); G3DSA:1.20.58.60 (GENE3D); IPR002017 (PFAM); IPR001452 (PFAM); mobidb-lite (MOBIDB_LITE); mobidb-lite (MOBIDB_LITE); PTHR11915 (PANTHER); IPR001452 (PROSITE_PROFILES); cd00176 (CDD); SSF46966 (SUPERFAMILY); SSF46966 (SUPERFAMILY); IPR036028 (SUPERFAMILY); SSF46966 (SUPERFAMILY)	F:GO:0005515	F:protein binding
EVSurface		DN10916_c1_g1_i1_40242	445	123247	9.66667	18	9	13	5	0.17		Dynein light chain type 1 2	TRUE	[INTERPRO, BLASTED, MAPPED, ANNOTATED]	603	20	0	70.33	2	P:GO:0007017; C:GO:0030286	P:microtubule-based process; C:dynein complex			IPR037177 (G3DSA:3.30.740.GENE3D); IPR001372 (PFAM); mobidb-lite (MOBIDB_LITE); mobidb-lite (MOBIDB_LITE); mobidb-lite (MOBIDB_LITE); mobidb-lite (MOBIDB_LITE); mobidb-lite (MOBIDB_LITE); mobidb-lite (MOBIDB_LITE); mobidb-lite (MOBIDB_LITE); IPR037177 (SUPERFAMILY)	P:GO:0007017; C:GO:0030286	P:microtubule-based process; C:dynein complex
EVSurface		DN7407_c0_g1_i1_28602	307	46080	9.66667	8	5	8	5	0.41		14-3-3 protein epsilon isoform X1	TRUE	[INTERPRO, BLASTED, MAPPED, ANNOTATED]	255	20	2.17594e-171	86.86	6	P:GO:0040024; P:GO:0042308; P:GO:0051220; F:GO:0008134; C:GO:0005634; C:GO:0005737	P:dauer larval development; P:negative regulation of protein import into nucleus; P:cytoplasmic sequestering of protein; F:transcription factor binding; C:nucleus; C:cytoplasm			Coil (COILS); Coil (COILS); IPR000308 (PRINTS); IPR036815 (G3DSA:1.20.190.GENE3D); IPR023410 (PFAM); IPR000308 (PIRSF); PTHR18860:SF17 (PANTHER); IPR000308 (PANTHER); IPR023409 (PROSITE_PATTERNS); cd08774 (CDD); IPR036815 (SUPERFAMILY)	no GO terms	no GO terms
EVSurface		DN8463_c0_g1_i1_20536	153	24293	9.66667	17	8	8	5	1.46		Thioredoxin fold	TRUE	[INTERPRO, BLASTED, MAPPED]	116	20	1.37022e-69	75.33	6	P:GO:0006662; P:GO:0022900; P:GO:0045454; P:GO:0055114; F:GO:0009055; F:GO:0015035	P:glycerol ether metabolic process; P:electron transport chain; P:cell redox homeostasis; P:oxidation-reduction process; F:electron transfer activity; F:protein disulfide oxidoreductase activity			IPR013766 (PFAM); IPR036249 (G3DSA:3.40.30.GENE3D); cd02947 (CDD); IPR036249 (SUPERFAMILY)	no GO terms	no GO terms
EVSurface		DN10593_c0_g1_i11_28936	208	44445	9.33333	9	5	8	4	0.43		putative zinc binding dehydrogenase	TRUE	[INTERPRO, BLASTED, MAPPED, ANNOTATED]	349	20	0	75.9	3	P:GO:0055114; F:GO:0016491; F:GO:0046872	P:oxidation-reduction process; F:oxidoreductase activity; F:metal ion binding			Coil (COILS); IPR013149 (PFAM); G3DSA:3.90.180.10 (GENE3D); G3DSA:3.40.50.720 (GENE3D); IPR013154 (PFAM); PTHR43981 (PANTHER); PTHR43981:SF2 (PANTHER); cd08290 (CDD); IPR036291 (SUPERFAMILY); IPR011032 (SUPERFAMILY)	P:GO:0055114	P:oxidation-reduction process
EVSurface		DN11373_c4_g1_i1_50185	203	72176	9.33333	17	5	15	5	0.25		rab11 family interacting protein 4A	TRUE	[INTERPRO, BLASTED, MAPPED, ANNOTATED]	500	20	0	76.82	1	F:GO:0005509	F:calcium ion binding			Coil (COILS); Coil (COILS); Coil (COILS); Coil (COILS); IPR002048 (PFAM); IPR019018 (PFAM); G3DSA:1.10.238.10 (GENE3D); mobidb-lite (MOBIDB_LITE); mobidb-lite (MOBIDB_LITE); PTHR15726 (PANTHER); PTHR15726:SF7 (PANTHER); IPR019018 (PROSITE_PROFILES); IPR002048 (PROSITE_PROFILES); IPR002048 (PROSITE_PROFILES); IPR037245 (SUPERFAMILY); IPR011992 (SUPERFAMILY)	F:GO:0005509	F:calcium ion binding
EVSurface		DN15763_c0_g1_i1_57495	123	30627	9.33333	11	6	7	4	0.86	1	tegumental protein	TRUE	[INTERPRO, BLASTED, MAPPED, ANNOTATED]	169	20	1.00633e-100	81.53	2	P:GO:0007017; C:GO:0030286	P:microtubule-based process; C:dynein complex			Coil (COILS); IPR037177 (G3DSA:3.30.740.GENE3D); IPR001372 (PFAM); IPR037177 (SUPERFAMILY)	P:GO:0007017; C:GO:0030286	P:microtubule-based process; C:dynein complex
EVSurface		DN9080_c0_g1_i1_35577	376	56261	9.33333	13	8	9	5	0.49		actin protein 3B	TRUE	[INTERPRO, BLASTED, MAPPED, ANNOTATED]	421	20	0	91.72	3	P:GO:0034314; F:GO:0005524; C:GO:0005885	P:Arp2/3 complex-mediated actin nucleation; F:ATP binding; C:Arp2/3 protein complex			G3DSA:3.90.640.10 (GENE3D); IPR004000 (PFAM); G3DSA:3.30.420.40 (GENE3D); G3DSA:3.30.420.40 (GENE3D); IPR015623 (PTHR11937:PANTHER); IPR004000 (PANTHER); IPR020902 (PROSITE_PATTERNS); cd00012 (CDD); IPR043129 (SUPERFAMILY); IPR043129 (SUPERFAMILY)	P:GO:0007015; P:GO:0034314; F:GO:0005524; C:GO:0005885	P:actin filament organization; P:Arp2/3 complex-mediated actin nucleation; F:ATP binding; C:Arp2/3 protein complex
EVSurface		DN9591_c0_g1_i2_51127	353	14777	9.33333	20	13	4	2	0.51		secreted antigen Ts8B1	TRUE	[INTERPRO, BLASTED]	99	17	1.27075e-08	67.45						Coil (COILS); IPR008860 (PFAM)	no GO terms	no GO terms
EVSurface		DN11794_c0_g2_i2_60950	122	128907	9	12	4	10	3	0.11		hypothetical transcript	TRUE	[INTERPRO, BLASTED, MAPPED, ANNOTATED]	953	20	0	57.43	1	C:GO:0016020	C:membrane			mobidb-lite (MOBIDB_LITE); mobidb-lite (MOBIDB_LITE)	no GO terms	no GO terms
EVSurface		DN11808_c0_g5_i1_55858	401	32818	9	15	11	10	6	1.62		aldo keto reductase family 1 member B4	TRUE	[INTERPRO, BLASTED, MAPPED, ANNOTATED]	244	20	1.71085e-115	77.75	2	P:GO:0055114; F:GO:0016491	P:oxidation-reduction process; F:oxidoreductase activity			IPR020471 (PRINTS); IPR023210 (PFAM); IPR020471 (PIRSF); IPR036812 (G3DSA:3.20.20.GENE3D); PTHR11732:SF482 (PANTHER); IPR020471 (PANTHER); IPR018170 (PROSITE_PATTERNS); IPR018170 (PROSITE_PATTERNS); IPR023210 (CDD); IPR036812 (SUPERFAMILY)	P:GO:0055114; F:GO:0016491	P:oxidation-reduction process; F:oxidoreductase activity
EVSurface		DN5743_c0_g1_i2_28647	117	39194	9	11	2	11	2	0.18		Actin binding WH2	TRUE	[INTERPRO, BLASTED, MAPPED]	288	11	1.15043e-42	58.39	1	F:GO:0003779	F:actin binding			IPR003124 (PFAM); mobidb-lite (MOBIDB_LITE); mobidb-lite (MOBIDB_LITE); mobidb-lite (MOBIDB_LITE); IPR003124 (PROSITE_PROFILES)	F:GO:0003779	F:actin binding
EVSurface		DN7526_c0_g1_i1_37162	133	64874	9	18	6	16	6	0.35		alkaline phosphatase	TRUE	[INTERPRO, BLASTED, MAPPED, ANNOTATED]	539	20	0	74.61	2	P:GO:0016311; F:GO:0004035	P:dephosphorylation; F:alkaline phosphatase activity	EC:3.1.3.1	Alkaline phosphatase	IPR001952 (PRINTS); IPR001952 (PFAM); IPR017850 (G3DSA:3.40.720.GENE3D); IPR001952 (PANTHER); IPR018299 (PROSITE_PATTERNS); IPR001952 (CDD); IPR017850 (SUPERFAMILY)	F:GO:0003824; F:GO:0016791	F:catalytic activity; F:phosphatase activity
EVSurface		DN8420_c0_g1_i2_7744	232	42992	9	10	5	9	5	0.45		Annexin A7	TRUE	[INTERPRO, BLASTED, MAPPED, ANNOTATED]	310	20	6.64358e-154	75.86	2	F:GO:0005509; F:GO:0005544	F:calcium ion binding; F:calcium-dependent phospholipid binding			IPR001464 (PRINTS); IPR037104 (G3DSA:1.10.220.GENE3D); IPR037104 (G3DSA:1.10.220.GENE3D); IPR018502 (PFAM); IPR037104 (G3DSA:1.10.220.GENE3D); IPR037104 (G3DSA:1.10.220.GENE3D); PTHR10502:SF226 (PANTHER); PTHR10502 (PANTHER); IPR018252 (PROSITE_PATTERNS); IPR018502 (PROSITE_PROFILES); IPR018502 (PROSITE_PROFILES); IPR018502 (PROSITE_PROFILES); IPR018502 (PROSITE_PROFILES); IPR037104 (SUPERFAMILY)	F:GO:0005509; F:GO:0005544	F:calcium ion binding; F:calcium-dependent phospholipid binding
EVSurface		DN8604_c0_g1_i1_49905	208	113519	9	13	5	12	4	0.15		Band 3 anion transport protein	TRUE	[INTERPRO, BLASTED, MAPPED, ANNOTATED]	914	20	0	63.34	4	P:GO:0015698; P:GO:0098656; F:GO:0005452; C:GO:0016021	P:inorganic anion transport; P:anion transmembrane transport; F:inorganic anion exchanger activity; C:integral component of membrane			IPR013769 (PFAM); IPR016152 (G3DSA:3.40.930.GENE3D); G3DSA:1.10.287.570 (GENE3D); IPR011531 (PFAM); mobidb-lite (MOBIDB_LITE); IPR003020 (PANTHER); IPR016152 (SUPERFAMILY)	P:GO:0006820; F:GO:0005452; F:GO:0008509; C:GO:0016020; C:GO:0016021	P:anion transport; F:inorganic anion exchanger activity; F:anion transmembrane transporter activity; C:membrane; C:integral component of membrane
EVSurface		DN8664_c0_g1_i1_13160	80	72680	9	15	3	14	3	0.14		glycerol kinase	TRUE	[INTERPRO, BLASTED, MAPPED, ANNOTATED]	411	20	0	77.88	4	P:GO:0005975; P:GO:0016310; F:GO:0016301; F:GO:0016773	P:carbohydrate metabolic process; P:phosphorylation; F:kinase activity; F:phosphotransferase activity, alcohol group as acceptor			G3DSA:3.30.420.40 (GENE3D); IPR018485 (PFAM); IPR018484 (PFAM); G3DSA:3.30.420.40 (GENE3D); PTHR10196:SF69 (PANTHER); PTHR10196 (PANTHER); IPR018483 (PROSITE_PATTERNS); IPR043129 (SUPERFAMILY); IPR043129 (SUPERFAMILY)	P:GO:0005975; F:GO:0016773	P:carbohydrate metabolic process; F:phosphotransferase activity, alcohol group as acceptor
EVSurface		DN10221_c0_g1_i1_65390	283	53501	8.66667	12	7	10	7	0.52		Fructose-bisphosphate aldolase	TRUE	[INTERPRO, BLASTED, MAPPED, ANNOTATED]	374	20	0	91.34	2	P:GO:0006096; F:GO:0004332	P:glycolytic process; F:fructose-bisphosphate aldolase activity	EC:4.1.2.13	Fructose-bisphosphate aldolase	IPR013785 (G3DSA:3.20.20.GENE3D); IPR000741 (PFAM); PTHR11627 (PANTHER); IPR029768 (PROSITE_PATTERNS); cd00948 (CDD); SSF51569 (SUPERFAMILY)	P:GO:0006096; F:GO:0003824; F:GO:0004332	P:glycolytic process; F:catalytic activity; F:fructose-bisphosphate aldolase activity
EVSurface		DN10518_c0_g2_i2_28849	123	38469	8.66667	10	5	10	5	0.51		Small heat shock protein p36	TRUE	[INTERPRO, BLASTED, MAPPED, ANNOTATED]	317	20	0	84.45	1	C:GO:0005737	C:cytoplasm			IPR008978 (G3DSA:2.60.40.GENE3D); IPR008978 (G3DSA:2.60.40.GENE3D); IPR002068 (PFAM); G3DSA:1.10.10.1750 (GENE3D); IPR001436 (PANTHER); PTHR45640:SF13 (PANTHER); IPR001436 (PANTHER); PTHR45640:SF13 (PANTHER); IPR002068 (PROSITE_PROFILES); IPR002068 (PROSITE_PROFILES); cd06526 (CDD); cd06526 (CDD); IPR008978 (SUPERFAMILY); IPR008978 (SUPERFAMILY)	no GO terms	no GO terms
EVSurface		DN2084_c0_g1_i1_26571	110	73876	8.66667	10	3	10	3	0.14		Basement membrane-specific heparan sulfate proteoglycan core protein	TRUE	[INTERPRO, BLASTED, MAPPED, ANNOTATED]	671	20	0	60.57	1	C:GO:0016021	C:integral component of membrane			mobidb-lite (MOBIDB_LITE); IPR007110 (PROSITE_PROFILES); IPR007110 (PROSITE_PROFILES)	no GO terms	no GO terms
EVSurface		DN10735_c0_g1_i2_60351	140	59846	8.33333	8	3	7	3	0.17		expressed conserved protein	TRUE	[INTERPRO, BLASTED]	461	13	8.22353e-132	61.39						mobidb-lite (MOBIDB_LITE); mobidb-lite (MOBIDB_LITE); mobidb-lite (MOBIDB_LITE); mobidb-lite (MOBIDB_LITE); mobidb-lite (MOBIDB_LITE); mobidb-lite (MOBIDB_LITE); mobidb-lite (MOBIDB_LITE); mobidb-lite (MOBIDB_LITE); mobidb-lite (MOBIDB_LITE); mobidb-lite (MOBIDB_LITE)	no GO terms	no GO terms
EVSurface		DN11357_c0_g1_i3_64319	250	73107	8.33333	15	6	13	4	0.25		moesin/ezrin/radixin homolog 1-like	TRUE	[INTERPRO, BLASTED, MAPPED, ANNOTATED]	621	20	0	73.05	6	P:GO:0035850; P:GO:0042074; P:GO:0090504; P:GO:1902017; F:GO:0008092; C:GO:0005856	P:epithelial cell differentiation involved in kidney development; P:cell migration involved in gastrulation; P:epiboly; P:regulation of cilium assembly; F:cytoskeletal protein binding; C:cytoskeleton			Coil (COILS); IPR019749 (PRINTS); IPR000798 (PRINTS); IPR014352 (G3DSA:1.20.80.GENE3D); IPR019748 (PFAM); IPR018980 (PFAM); IPR011993 (G3DSA:2.30.29.GENE3D); mobidb-lite (MOBIDB_LITE); mobidb-lite (MOBIDB_LITE); mobidb-lite (MOBIDB_LITE); mobidb-lite (MOBIDB_LITE); mobidb-lite (MOBIDB_LITE); PTHR23281 (PANTHER); PTHR23281:SF18 (PANTHER); IPR000299 (PROSITE_PROFILES); IPR019748 (CDD); SSF50729 (SU…	F:GO:0008092; C:GO:0005856	F:cytoskeletal protein binding; C:cytoskeleton
EVSurface		DN11385_c0_g2_i1_50065	127	64969	8.33333	10	1	9	1	0.05		T-complex protein 1 subunit gamma	TRUE	[INTERPRO, BLASTED, MAPPED, ANNOTATED]	539	20	0	91.97	4	P:GO:0006457; F:GO:0005524; F:GO:0051082; C:GO:0005737	P:protein folding; F:ATP binding; F:unfolded protein binding; C:cytoplasm			IPR017998 (PRINTS); IPR012719 (TIGRFAM); IPR027409 (G3DSA:3.50.7.GENE3D); IPR002423 (PFAM); IPR027410 (G3DSA:3.30.260.GENE3D); IPR027413 (G3DSA:1.10.560.GENE3D); PTHR11353 (PANTHER); PTHR11353:SF24 (PANTHER); IPR002194 (PROSITE_PATTERNS); IPR002194 (PROSITE_PATTERNS); IPR002194 (PROSITE_PATTERNS); IPR012719 (CDD); IPR027413 (SUPERFAMILY); IPR027409 (SUPERFAMILY); IPR027410 (SUPERFAMILY)	P:GO:0006457; F:GO:0005524; F:GO:0051082	P:protein folding; F:ATP binding; F:unfolded protein binding
EVSurface		DN11711_c0_g1_i1_47955	178	50447	8.33333	9	3	9	3	0.21		expressed conserved protein	TRUE	[INTERPRO, BLASTED]	400	19	3.81169e-145	67.4						Coil (COILS); Coil (COILS); mobidb-lite (MOBIDB_LITE); mobidb-lite (MOBIDB_LITE); mobidb-lite (MOBIDB_LITE); mobidb-lite (MOBIDB_LITE)	no GO terms	no GO terms
EVSurface		DN11803_c0_g1_i4_69785	214	59021	8.33333	16	6	11	5	0.38		carbonic anhydrase	TRUE	[INTERPRO, BLASTED, MAPPED, ANNOTATED]	302	20	4.4527e-146	65.71	3	F:GO:0004089; F:GO:0008270; C:GO:0016020	F:carbonate dehydratase activity; F:zinc ion binding; C:membrane	EC:4.2.1.1	Carbonic anhydrase	IPR036398 (G3DSA:3.10.200.GENE3D); IPR001148 (PFAM); IPR023561 (PANTHER); IPR018431 (PTHR18952:PANTHER); IPR018338 (PROSITE_PATTERNS); IPR001148 (PROSITE_PROFILES); cd00326 (CDD); IPR036398 (SUPERFAMILY)	F:GO:0004089; F:GO:0008270	F:carbonate dehydratase activity; F:zinc ion binding
EVSurface		DN7647_c0_g1_i1_34152	208	44381	8.33333	10	7	7	5	0.54		endophilin A3	TRUE	[INTERPRO, BLASTED, MAPPED, ANNOTATED]	325	20	1.17559e-96	59.3	10	P:GO:0031175; P:GO:0031323; P:GO:0043933; P:GO:0048259; P:GO:0048488; P:GO:0060255; F:GO:0005515; C:GO:0005768; C:GO:0005829; C:GO:0098793	P:neuron projection development; P:regulation of cellular metabolic process; P:protein-containing complex subunit organization; P:regulation of receptor-mediated endocytosis; P:synaptic vesicle endocytosis; P:regulation of macromolecule metabolic process; F:protein binding; C:endosome; C:cytosol; C:presynapse			Coil (COILS); Coil (COILS); PR00499 (PRINTS); IPR001452 (PRINTS); IPR001452 (PFAM); IPR027267 (G3DSA:1.20.1270.GENE3D); G3DSA:2.30.30.40 (GENE3D); IPR018859 (PFAM); PTHR14167:SF50 (PANTHER); PTHR14167 (PANTHER); IPR001452 (PROSITE_PROFILES); IPR036028 (SUPERFAMILY); IPR027267 (SUPERFAMILY)	F:GO:0005515	F:protein binding
EVSurface		DN8518_c0_g1_i2_15315	160	39332	8.33333	9	6	5	3	0.62		unnamed protein product	TRUE	[INTERPRO, BLASTED]	231	1	5.44336e-08	57.94						mobidb-lite (MOBIDB_LITE); mobidb-lite (MOBIDB_LITE); mobidb-lite (MOBIDB_LITE); mobidb-lite (MOBIDB_LITE)	no GO terms	no GO terms
EVSurface		DN8639_c0_g2_i1_25958	189	37948	8.33333	11	5	7	2	0.29		expressed conserved protein	TRUE	[INTERPRO, BLASTED, MAPPED]	240	20	1.66222e-76	63.64	2	C:GO:0016020; C:GO:0016021	C:membrane; C:integral component of membrane			mobidb-lite (MOBIDB_LITE); mobidb-lite (MOBIDB_LITE)	no GO terms	no GO terms
EVSurface		DN9645_c0_g1_i2_33804	88	97642	8.33333	11	1	10	1	0.03		CC2D1B protein	TRUE	[INTERPRO, BLASTED, MAPPED, ANNOTATED]	806	20	0	66.44	2	P:GO:0000122; F:GO:0001227	P:negative regulation of transcription by RNA polymerase II; F:DNA-binding transcription repressor activity, RNA polymerase II-specific			Coil (COILS); Coil (COILS); Coil (COILS); IPR035892 (G3DSA:2.60.40.GENE3D); mobidb-lite (MOBIDB_LITE); mobidb-lite (MOBIDB_LITE); mobidb-lite (MOBIDB_LITE); mobidb-lite (MOBIDB_LITE); mobidb-lite (MOBIDB_LITE); mobidb-lite (MOBIDB_LITE); mobidb-lite (MOBIDB_LITE); mobidb-lite (MOBIDB_LITE); mobidb-lite (MOBIDB_LITE); mobidb-lite (MOBIDB_LITE); IPR039725 (PANTHER); SSF49562 (SUPERFAMILY)	F:GO:0001227	F:DNA-binding transcription repressor activity, RNA polymerase II-specific
EVSurface		DN9960_c0_g2_i1_53801	229	52322	8.33333	8	5	8	5	0.36		expressed conserved protein	TRUE	[INTERPRO, BLASTED]	392	9	3.48393e-16	48.39						IPR043792 (PFAM); mobidb-lite (MOBIDB_LITE); mobidb-lite (MOBIDB_LITE); mobidb-lite (MOBIDB_LITE); mobidb-lite (MOBIDB_LITE); mobidb-lite (MOBIDB_LITE); mobidb-lite (MOBIDB_LITE); mobidb-lite (MOBIDB_LITE); mobidb-lite (MOBIDB_LITE); mobidb-lite (MOBIDB_LITE)	no GO terms	no GO terms
EVSurface		DN10573_c0_g1_i1_3170	233	25893	8	10	6	8	5	1.07		myoferlin isoform X14	TRUE	[INTERPRO, BLASTED, MAPPED, ANNOTATED]	178	20	1.93118e-65	75.25	2	P:GO:0007520; C:GO:0016021	P:myoblast fusion; C:integral component of membrane			IPR000008 (PRINTS); IPR000008 (PFAM); IPR035892 (G3DSA:2.60.40.GENE3D); PTHR45911 (PANTHER); IPR000008 (PROSITE_PROFILES); SSF49562 (SUPERFAMILY)	no GO terms	no GO terms
EVSurface	Immunomodulators	DN10645_c0_g1_i6_57768	162	52550	8	12	5	11	5	0.36		serine protease inhibitor	TRUE	[INTERPRO, BLASTED, MAPPED, ANNOTATED]	241	20	6.59011e-109	73.65	1	C:GO:0005615	C:extracellular space			IPR023796 (PFAM); IPR042185 (G3DSA:2.30.39.GENE3D); IPR042178 (G3DSA:3.30.497.GENE3D); IPR042185 (G3DSA:2.30.39.GENE3D); IPR000215 (PANTHER); IPR015557 (PTHR11461:PANTHER); IPR023795 (PROSITE_PATTERNS); cd00172 (CDD); IPR036186 (SUPERFAMILY)	F:GO:0004867; C:GO:0005615	F:serine-type endopeptidase inhibitor activity; C:extracellular space
EVSurface	Immunomodulators	DN11331_c0_g2_i2_50080	153	93222	8	6	3	6	3	0.11		CD63 antigen	TRUE	[INTERPRO, BLASTED, MAPPED, ANNOTATED]	226	20	3.35324e-139	77.97	1	C:GO:0016021	C:integral component of membrane			IPR000301 (PRINTS); IPR000301 (PIRSF); IPR018499 (PFAM); IPR008952 (G3DSA:1.10.1450.GENE3D); PTHR19282:SF39 (PANTHER); PTHR19282 (PANTHER); IPR018503 (PROSITE_PATTERNS); cd03127 (CDD); IPR008952 (SUPERFAMILY)	C:GO:0016021	C:integral component of membrane
EVSurface		DN11803_c0_g3_i1_69783	251	45463	8	11	9	9	7	0.88		carbonic anhydrase	TRUE	[INTERPRO, BLASTED, MAPPED, ANNOTATED]	322	20	1.24101e-118	63.43	3	F:GO:0016829; F:GO:0046872; C:GO:0016020	F:lyase activity; F:metal ion binding; C:membrane			IPR001148 (PFAM); IPR036398 (G3DSA:3.10.200.GENE3D); IPR018431 (PTHR18952:PANTHER); IPR023561 (PANTHER); IPR018338 (PROSITE_PATTERNS); IPR001148 (PROSITE_PROFILES); cd00326 (CDD); IPR036398 (SUPERFAMILY)	F:GO:0004089; F:GO:0008270	F:carbonate dehydratase activity; F:zinc ion binding
EVSurface		DN1202_c0_g1_i1_62670	139	22790	8	7	4	5	2	0.73		Profilin allergen	TRUE	[INTERPRO, BLASTED, MAPPED, ANNOTATED]	129	20	1.69877e-61	62.99	1	F:GO:0003779	F:actin binding			IPR005455 (PFAM); G3DSA:3.30.450.30 (GENE3D); IPR036140 (SUPERFAMILY)	F:GO:0003779	F:actin binding
EVSurface		DN4676_c0_g1_i1_76672	128	29965	8	6	4	4	3	0.52	3	tegumental protein	TRUE	[INTERPRO, BLASTED, MAPPED, ANNOTATED]	189	20	9.92958e-112	73.3	2	F:GO:0005509; C:GO:0016020	F:calcium ion binding; C:membrane			G3DSA:1.10.238.10 (GENE3D); IPR018247 (PROSITE_PATTERNS); IPR011992 (SUPERFAMILY)	no GO terms	no GO terms
EVSurface		DN9626_c0_g1_i1_73563	131	52357	8	12	3	10	3	0.2		basigin related	TRUE	[INTERPRO, BLASTED, MAPPED, ANNOTATED]	308	20	4.41078e-107	64.73	8	P:GO:0001682; P:GO:0006508; P:GO:0090502; F:GO:0003723; F:GO:0004198; F:GO:0004526; C:GO:0016021; C:GO:0030677	P:tRNA 5'-leader removal; P:proteolysis; P:RNA phosphodiester bond hydrolysis, endonucleolytic; F:RNA binding; F:calcium-dependent cysteine-type endopeptidase activity; F:ribonuclease P activity; C:integral component of membrane; C:ribonuclease P complex	EC:3.4.22; EC:3.4.22.1; EC:3.4.99; EC:3.1.30; EC:3.1.26; EC:3.4.22.41; EC:3.4.22.40; EC:3.1.26.5; EC:3.4.22.34; EC:3.4.22.8; EC:3.4.22.28; EC:3.4.22.16; EC:3.4.22.27; EC:3.4.22.38; EC:3.4.22.15; EC:3.4.22.14	Acting on peptide bonds (peptidases); Cathepsin B; Acting on peptide bonds (peptidases); Acting on ester bonds; Acting on ester bonds; Cathepsin F; Bleomycin hydrolase; Ribonuclease P; Legumain; Clostripain; Picornain 3C; Cathepsin H; Cathepsin S; Cathepsin K; Cathepsin L; Actinidain	IPR013783 (G3DSA:2.60.40.GENE3D); mobidb-lite (MOBIDB_LITE); IPR044157 (PTHR10075:PANTHER); IPR043204 (PANTHER); IPR007110 (PROSITE_PROFILES); cd00096 (CDD); IPR036179 (SUPERFAMILY)	P:GO:0007155; P:GO:0007411; F:GO:0005515; C:GO:0005886	P:cell adhesion; P:axon guidance; F:protein binding; C:plasma membrane
EVSurface		DN10753_c0_g1_i1_47583	248	28224	7.66667	10	8	8	6	1.44		unnamed protein product	TRUE	[INTERPRO, BLASTED]	170	1	7.16019e-08	47.25						mobidb-lite (MOBIDB_LITE)	no GO terms	no GO terms
EVSurface		DN10965_c0_g1_i5_14412	335	19634	7.66667	13	10	7	6	1.58	2	Non-lysosomal glucosylceramidase	TRUE	[INTERPRO, BLASTED, MAPPED, ANNOTATED]	171	20	5.52043e-73	67.05	1	F:GO:0003824	F:catalytic activity			IPR024462 (PFAM); PTHR12654 (PANTHER)	no GO terms	no GO terms
EVSurface		DN11588_c0_g1_i3_75796	90	49132	7.66667	11	2	10	2	0.14		Mediator of RNA polymerase II transcription	TRUE	[INTERPRO, BLASTED, MAPPED, ANNOTATED]	271	20	1.5389e-136	71.41	3	P:GO:0006357; F:GO:0003712; C:GO:0016592	P:regulation of transcription by RNA polymerase II; F:transcription coregulator activity; C:mediator complex			IPR009244 (PFAM); mobidb-lite (MOBIDB_LITE); PTHR21428 (PANTHER); IPR037212 (SUPERFAMILY)	P:GO:0006357; F:GO:0003712; C:GO:0016592	P:regulation of transcription by RNA polymerase II; F:transcription coregulator activity; C:mediator complex
EVSurface		DN6399_c0_g1_i2_2192	118	115009	7.66667	11	3	10	3	0.09		V type proton ATPase 116 kDa subunit a	TRUE	[INTERPRO, BLASTED, MAPPED, ANNOTATED]	896	20	0	75.22	4	P:GO:1902600; F:GO:0015078; C:GO:0000220; C:GO:0016021	P:proton transmembrane transport; F:proton transmembrane transporter activity; C:vacuolar proton-transporting V-type ATPase, V0 domain; C:integral component of membrane			Coil (COILS); IPR026028 (PIRSF); IPR002490 (PFAM); IPR002490 (PANTHER)	P:GO:1902600; F:GO:0015078; C:GO:0000220; C:GO:0033179	P:proton transmembrane transport; F:proton transmembrane transporter activity; C:vacuolar proton-transporting V-type ATPase, V0 domain; C:proton-transporting V-type ATPase, V0 domain
EVSurface		DN8881_c0_g1_i1_74706	365	37362	7.66667	12	9	9	7	0.97	2	tegumental antigen	TRUE	[INTERPRO, BLASTED, MAPPED]	248	20	5.19976e-101	57.14	4	P:GO:0007017; F:GO:0003677; F:GO:0005509; C:GO:0030286	P:microtubule-based process; F:DNA binding; F:calcium ion binding; C:dynein complex			IPR002048 (PFAM); G3DSA:1.10.238.10 (GENE3D); IPR037177 (G3DSA:3.30.740.GENE3D); IPR001372 (PFAM); mobidb-lite (MOBIDB_LITE); mobidb-lite (MOBIDB_LITE); IPR002048 (PROSITE_PROFILES); IPR002048 (PROSITE_PROFILES); IPR002048 (CDD); IPR011992 (SUPERFAMILY); IPR037177 (SUPERFAMILY)	P:GO:0007017; F:GO:0005509; C:GO:0030286	P:microtubule-based process; F:calcium ion binding; C:dynein complex
EVSurface	Immunomodulators	DN9485_c0_g1_i1_31367	134	50822	7.66667	6	3	6	3	0.21		agmatinase mitochondrial-like	TRUE	[INTERPRO, BLASTED, MAPPED, ANNOTATED]	306	20	1.79418e-149	77.2	4	P:GO:0000050; P:GO:0006525; F:GO:0004053; F:GO:0046872	P:urea cycle; P:arginine metabolic process; F:arginase activity; F:metal ion binding	EC:3.5.3.1	Arginase	IPR006035 (PRINTS); IPR006035 (PFAM); IPR014033 (TIGRFAM); IPR006035 (PIRSF); G3DSA:3.40.800.10 (GENE3D); PTHR43782 (PANTHER); IPR020855 (PROSITE_PATTERNS); IPR006035 (PROSITE_PROFILES); IPR014033 (CDD); IPR023696 (SUPERFAMILY)	P:GO:0006525; F:GO:0004053; F:GO:0016813; F:GO:0046872	P:arginine metabolic process; F:arginase activity; F:hydrolase activity, acting on carbon-nitrogen (but not peptide) bonds, in linear amidines; F:metal ion binding
EVSurface		DN9714_c0_g1_i3_20481	127	111063	7.66667	13	1	12	1	0.03		Basement membrane-specific heparan sulfate proteoglycan core protein	TRUE	[INTERPRO, BLASTED]	845	20	0	76.13						IPR002172 (PRINTS); IPR013783 (G3DSA:2.60.40.GENE3D); IPR036055 (G3DSA:4.10.400.GENE3D); PF13927 (PFAM); IPR013151 (PFAM); IPR036055 (G3DSA:4.10.400.GENE3D); IPR036055 (G3DSA:4.10.400.GENE3D); IPR002172 (PFAM); IPR013783 (G3DSA:2.60.40.GENE3D); IPR013783 (G3DSA:2.60.40.GENE3D); IPR013783 (G3DSA:2.60.40.GENE3D); PTHR12231 (PANTHER); IPR023415 (PROSITE_PATTERNS); IPR002172 (PROSITE_PROFILES); IPR00…	F:GO:0005515	F:protein binding
EVSurface		DN9764_c0_g1_i1_58013	195	33959	7.66667	9	5	8	4	0.59		adenosine deaminase	TRUE	[INTERPRO, BLASTED, MAPPED, ANNOTATED]	287	20	2.04514e-132	71.8	2	P:GO:0009168; F:GO:0019239	P:purine ribonucleoside monophosphate biosynthetic process; F:deaminase activity			G3DSA:3.20.20.140 (GENE3D); IPR001365 (PFAM); PTHR11409:SF43 (PANTHER); PTHR11409 (PANTHER); IPR032466 (SUPERFAMILY)	F:GO:0019239	F:deaminase activity
EVSurface		DN10970_c0_g1_i1_26507	188	46017	7.33333	8	3	8	3	0.23		calumenin isoform X2	TRUE	[INTERPRO, BLASTED, MAPPED, ANNOTATED]	308	20	1.37444e-175	77.31	2	F:GO:0005509; C:GO:0016020	F:calcium ion binding; C:membrane			G3DSA:1.10.238.10 (GENE3D); IPR002048 (PFAM); G3DSA:1.10.238.10 (GENE3D); IPR002048 (PFAM); G3DSA:1.10.238.10 (GENE3D); IPR002048 (PFAM); IPR002048 (PFAM); IPR027239 (PTHR10827:PANTHER); PTHR10827 (PANTHER); IPR018247 (PROSITE_PATTERNS); IPR018247 (PROSITE_PATTERNS); IPR018247 (PROSITE_PATTERNS); IPR018247 (PROSITE_PATTERNS); IPR018247 (PROSITE_PATTERNS); IPR002048 (PROSITE_PROFILES); IPR002048 (…	F:GO:0005509	F:calcium ion binding
EVSurface		DN11053_c0_g1_i1_16541	208	133410	7.33333	13	4	11	3	0.1		Multidrug resistance protein	TRUE	[INTERPRO, BLASTED, MAPPED, ANNOTATED]	303	20	0	86.22	6	P:GO:0015721; P:GO:0055085; F:GO:0005524; F:GO:0016887; F:GO:0042626; C:GO:0016021	P:bile acid and bile salt transport; P:transmembrane transport; F:ATP binding; F:ATPase activity; F:ATPase-coupled transmembrane transporter activity; C:integral component of membrane	EC:3.6.1.3; EC:3.6.1.15	Adenosinetriphosphatase; Nucleoside-triphosphate phosphatase	IPR036640 (G3DSA:1.20.1560.GENE3D); IPR003439 (PFAM); G3DSA:3.40.50.300 (GENE3D); IPR039421 (PANTHER); PTHR24221:SF501 (PANTHER); IPR017871 (PROSITE_PATTERNS); IPR003439 (PROSITE_PROFILES); cd03249 (CDD); IPR027417 (SUPERFAMILY)	F:GO:0005524; F:GO:0016887; C:GO:0016021	F:ATP binding; F:ATPase activity; C:integral component of membrane
EVSurface		DN11139_c0_g1_i1_62410	74	44198	7.33333	7	2	7	2	0.16		Glyceraldehyde-3-phosphate dehydrogenase	TRUE	[INTERPRO, BLASTED, MAPPED, ANNOTATED]	354	20	0	91.15	7	P:GO:0006006; P:GO:0006096; P:GO:0055114; F:GO:0004365; F:GO:0050661; F:GO:0051287; C:GO:0005737	P:glucose metabolic process; P:glycolytic process; P:oxidation-reduction process; F:glyceraldehyde-3-phosphate dehydrogenase (NAD+) (phosphorylating) activity; F:NADP binding; F:NAD binding; C:cytoplasm	EC:1.2.1.59; EC:1.2.1.12	Glyceraldehyde-3-phosphate dehydrogenase (NAD(P)(+)) (phosphorylating); Glyceraldehyde-3-phosphate dehydrogenase (phosphorylating)	IPR020831 (PRINTS); IPR020828 (PFAM); G3DSA:3.30.360.10 (GENE3D); IPR020831 (PIRSF); IPR020829 (PFAM); G3DSA:3.40.50.720 (GENE3D); IPR006424 (TIGRFAM); IPR020831 (PANTHER); IPR020830 (PROSITE_PATTERNS); SSF55347 (SUPERFAMILY); IPR036291 (SUPERFAMILY)	P:GO:0006006; P:GO:0055114; F:GO:0016620; F:GO:0050661; F:GO:0051287	P:glucose metabolic process; P:oxidation-reduction process; F:oxidoreductase activity, acting on the aldehyde or oxo group of donors, NAD or NADP as acceptor; F:NADP binding; F:NAD binding
EVSurface		DN11753_c0_g1_i7_48074	253	40864	7.33333	10	5	8	4	0.48		Annexin A7	TRUE	[INTERPRO, BLASTED, MAPPED, ANNOTATED]	318	20	4.06655e-177	75.41	2	F:GO:0005509; F:GO:0005544	F:calcium ion binding; F:calcium-dependent phospholipid binding			Coil (COILS); IPR001464 (PRINTS); IPR037104 (G3DSA:1.10.220.GENE3D); IPR037104 (G3DSA:1.10.220.GENE3D); IPR037104 (G3DSA:1.10.220.GENE3D); IPR018502 (PFAM); IPR037104 (G3DSA:1.10.220.GENE3D); PTHR10502:SF226 (PANTHER); PTHR10502 (PANTHER); IPR018252 (PROSITE_PATTERNS); IPR018252 (PROSITE_PATTERNS); IPR018502 (PROSITE_PROFILES); IPR018502 (PROSITE_PROFILES); IPR018502 (PROSITE_PROFILES); IPR018502…	F:GO:0005509; F:GO:0005544	F:calcium ion binding; F:calcium-dependent phospholipid binding
EVSurface		DN12741_c0_g2_i8_70783	217	19229	7.33333	13	7	7	4	1.24		retinol dehydrogenase 11	TRUE	[INTERPRO, BLASTED, MAPPED, ANNOTATED]	176	20	1.54937e-77	79.19	1	C:GO:0016021	C:integral component of membrane			G3DSA:3.40.50.720 (GENE3D); IPR002347 (PFAM); PTHR43157 (PANTHER); PTHR43157:SF45 (PANTHER); IPR036291 (SUPERFAMILY)	P:GO:0055114	P:oxidation-reduction process
EVSurface		DN5903_c0_g1_i1_30730	96	29238	7.33333	7	3	6	3	0.38		ras protein RABF2b	TRUE	[INTERPRO, BLASTED, MAPPED, ANNOTATED]	187	20	5.28496e-94	67.64	5	P:GO:0007186; F:GO:0003924; F:GO:0004930; F:GO:0005525; C:GO:0016021	P:G protein-coupled receptor signaling pathway; F:GTPase activity; F:G protein-coupled receptor activity; F:GTP binding; C:integral component of membrane	EC:3.6.1.15	Nucleoside-triphosphate phosphatase	PR00449 (PRINTS); IPR005225 (TIGRFAM); G3DSA:3.40.50.300 (GENE3D); IPR001806 (PFAM); PTHR47978 (PANTHER); PS51419 (PROSITE_PROFILES); cd00154 (CDD); IPR027417 (SUPERFAMILY)	F:GO:0003924; F:GO:0005525	F:GTPase activity; F:GTP binding
EVSurface		DN6261_c0_g1_i1_15045	209	44868	7.33333	9	5	8	4	0.43		alpha tocopherol transfer protein	TRUE	[INTERPRO, BLASTED]	348	20	0	68.13						IPR036865 (G3DSA:3.40.525.GENE3D); IPR001251 (PFAM); G3DSA:1.10.8.20 (GENE3D); PTHR10174 (PANTHER); IPR001251 (PROSITE_PROFILES); IPR001251 (CDD); IPR036865 (SUPERFAMILY); IPR036273 (SUPERFAMILY)	no GO terms	no GO terms
EVSurface		DN7755_c0_g2_i1_37040	65	77613	7.33333	11	3	10	3	0.13		Seryl tRNA Synthetase	TRUE	[INTERPRO, BLASTED, MAPPED, ANNOTATED]	506	20	0	84.41	3	P:GO:0006434; F:GO:0004828; F:GO:0005524	P:seryl-tRNA aminoacylation; F:serine-tRNA ligase activity; F:ATP binding	EC:6.1.1.11	Serine--tRNA ligase	Coil (COILS); IPR002317 (PRINTS); IPR002317 (TIGRFAM); IPR002317 (PIRSF); IPR015866 (PFAM); IPR042103 (G3DSA:1.10.287.GENE3D); IPR002314 (PFAM); G3DSA:3.30.930.10 (GENE3D); IPR002317 (PANTHER); IPR006195 (PROSITE_PROFILES); IPR033729 (CDD); SSF55681 (SUPERFAMILY); IPR010978 (SUPERFAMILY)	P:GO:0006418; P:GO:0006434; F:GO:0000166; F:GO:0004812; F:GO:0004828; F:GO:0005524	P:tRNA aminoacylation for protein translation; P:seryl-tRNA aminoacylation; F:nucleotide binding; F:aminoacyl-tRNA ligase activity; F:serine-tRNA ligase activity; F:ATP binding
EVSurface		DN8035_c0_g1_i1_68364	318	63559	7.33333	17	7	13	5	0.35		T-complex protein 1 subunit beta	TRUE	[INTERPRO, BLASTED, MAPPED, ANNOTATED]	557	20	0	91.5	4	P:GO:0006457; F:GO:0005524; F:GO:0051082; C:GO:0005832	P:protein folding; F:ATP binding; F:unfolded protein binding; C:chaperonin-containing T-complex			IPR017998 (PRINTS); IPR027410 (G3DSA:3.30.260.GENE3D); IPR002423 (PFAM); IPR027409 (G3DSA:3.50.7.GENE3D); IPR027413 (G3DSA:1.10.560.GENE3D); IPR012716 (TIGRFAM); PTHR11353 (PANTHER); IPR012716 (PTHR11353:PANTHER); IPR002194 (PROSITE_PATTERNS); IPR002194 (PROSITE_PATTERNS); IPR002194 (PROSITE_PATTERNS); IPR012716 (CDD); IPR027413 (SUPERFAMILY); IPR027410 (SUPERFAMILY); IPR027409 (SUPERFAMILY)	P:GO:0006457; F:GO:0005524; F:GO:0051082; C:GO:0005829; C:GO:0005832	P:protein folding; F:ATP binding; F:unfolded protein binding; C:cytosol; C:chaperonin-containing T-complex
EVSurface		DN8091_c0_g1_i1_68351	327	28150	7.33333	12	9	9	7	1.44	2	AChain A, calmodulin	TRUE	[INTERPRO, BLASTED, MAPPED, ANNOTATED]	155	20	1.0814e-72	80.76	44	P:GO:0000165; P:GO:0000226; P:GO:0002027; P:GO:0002576; P:GO:0005513; P:GO:0005980; P:GO:0007223; P:GO:0010800; P:GO:0010801; P:GO:0010881; P:GO:0016032; P:GO:0022400; P:GO:0031954; P:GO:0032465; P:GO:0032516; P:GO:0038095; P:GO:0043647; P:GO:0050999; P:GO:0051343; P:GO:0060315; P:GO:0060316; P:GO:0071902; P:GO:1901844; F:GO:0005509; F:GO:0008179; F:GO:0010856; F:GO:0019855; F:GO:0019901; F:GO:00…	P:MAPK cascade; P:microtubule cytoskeleton organization; P:regulation of heart rate; P:platelet degranulation; P:detection of calcium ion; P:glycogen catabolic process; P:Wnt signaling pathway, calcium modulating pathway; P:positive regulation of peptidyl-threonine phosphorylation; P:negative regulation of peptidyl-threonine phosphorylation; P:regulation of cardiac muscle contraction by regulatio…			PR00450 (PRINTS); G3DSA:1.10.238.10 (GENE3D); G3DSA:1.10.238.10 (GENE3D); G3DSA:1.10.238.10 (GENE3D); IPR002048 (PFAM); PTHR23050:SF427 (PANTHER); PTHR23050 (PANTHER); IPR018247 (PROSITE_PATTERNS); IPR018247 (PROSITE_PATTERNS); IPR018247 (PROSITE_PATTERNS); IPR018247 (PROSITE_PATTERNS); IPR002048 (PROSITE_PROFILES); IPR002048 (PROSITE_PROFILES); IPR002048 (PROSITE_PROFILES); IPR002048 (PROSITE_PR…	F:GO:0005509	F:calcium ion binding
EVSurface		DN9007_c0_g1_i2_22053	74	93354	7.33333	8	2	8	2	0.07		Synaptosomal-associated protein 25-A	TRUE	[INTERPRO, BLASTED, MAPPED, ANNOTATED]	160	20	4.23638e-71	73.14	2	P:GO:0007030; C:GO:0016021	P:Golgi organization; C:integral component of membrane			Coil (COILS); G3DSA:1.20.5.110 (GENE3D); mobidb-lite (MOBIDB_LITE); PTHR19305:SF14 (PANTHER); PTHR19305 (PANTHER); IPR000727 (PROSITE_PROFILES); cd15889 (CDD); SSF58038 (SUPERFAMILY)	no GO terms	no GO terms
EVSurface		DN9904_c0_g1_i3_17491	67	151298	7.33333	8	1	8	1	0.02		Collagen alpha-1(XV) chain	TRUE	[INTERPRO, BLASTED, MAPPED, ANNOTATED]	1275	20	0	72.55	1	C:GO:0005581	C:collagen trimer			IPR016186 (G3DSA:3.10.100.GENE3D); IPR010515 (PFAM); mobidb-lite (MOBIDB_LITE); mobidb-lite (MOBIDB_LITE); mobidb-lite (MOBIDB_LITE); mobidb-lite (MOBIDB_LITE); mobidb-lite (MOBIDB_LITE); mobidb-lite (MOBIDB_LITE); mobidb-lite (MOBIDB_LITE); mobidb-lite (MOBIDB_LITE); mobidb-lite (MOBIDB_LITE); mobidb-lite (MOBIDB_LITE); IPR016187 (SUPERFAMILY)	no GO terms	no GO terms
EVSurface		DN10721_c0_g1_i1_60346	124	64278	7	9	6	6	5	0.28	4	No hit	TRUE	[INTERPRO, NO-BLAST]	480									PR01217 (PRINTS); mobidb-lite (MOBIDB_LITE); mobidb-lite (MOBIDB_LITE); mobidb-lite (MOBIDB_LITE); mobidb-lite (MOBIDB_LITE); mobidb-lite (MOBIDB_LITE); mobidb-lite (MOBIDB_LITE); mobidb-lite (MOBIDB_LITE); mobidb-lite (MOBIDB_LITE); mobidb-lite (MOBIDB_LITE); mobidb-lite (MOBIDB_LITE); mobidb-lite (MOBIDB_LITE); mobidb-lite (MOBIDB_LITE); mobidb-lite (MOBIDB_LITE)	no GO terms	no GO terms
EVSurface		DN11062_c0_g2_i2_16524	104	37773	7	6	1	6	1	0.09		retinol dehydrogenase 11	TRUE	[INTERPRO, BLASTED]	317	20	6.76674e-159	73.06						IPR002347 (PRINTS); G3DSA:3.40.50.720 (GENE3D); IPR002347 (PFAM); PTHR43157 (PANTHER); PTHR43157:SF27 (PANTHER); PTHR43157:SF27 (PANTHER); PTHR43157 (PANTHER); cd05327 (CDD); IPR036291 (SUPERFAMILY)	P:GO:0055114	P:oxidation-reduction process
EVSurface		DN11211_c1_g1_i2_47858	60	17808	7	5	1	4	1	0.19	5	Uncharacterised
EVSurface	Immunomodulators	DN12662_c0_g1_i1_71915	242	31740	7	11	8	8	7	1.01		glutathione S-transferase	TRUE	[INTERPRO, BLASTED, MAPPED, ANNOTATED]	134	20	2.80495e-51	72.53	1	F:GO:0016740	F:transferase activity			G3DSA:1.20.1050.130 (GENE3D); IPR004046 (PFAM); PTHR11571 (PANTHER); PTHR11571:SF222 (PANTHER); IPR010987 (PROSITE_PROFILES); IPR036282 (SUPERFAMILY)	no GO terms	no GO terms
EVSurface		DN6202_c0_g1_i2_40662	208	22290	7	9	5	7	4	0.75		heat shock protein 67b2	TRUE	[INTERPRO, BLASTED, MAPPED]	113	20	5.49364e-49	73.73	3	F:GO:0016740; C:GO:0016020; C:GO:0016021	F:transferase activity; C:membrane; C:integral component of membrane			IPR001763 (PFAM); IPR036873 (G3DSA:3.40.250.GENE3D); PTHR44086:SF1 (PANTHER); PTHR44086 (PANTHER); IPR001763 (PROSITE_PROFILES); IPR036873 (SUPERFAMILY)	no GO terms	no GO terms
EVSurface		DN6825_c0_g1_i1_76788	198	30515	7	11	3	9	3	0.36		nascent polypeptide associated complex subunit	TRUE	[INTERPRO, BLASTED, MAPPED, ANNOTATED]	205	20	5.2922e-96	80.49	2	C:GO:0005854; C:GO:0016021	C:nascent polypeptide-associated complex; C:integral component of membrane			IPR002715 (PFAM); IPR038187 (G3DSA:2.20.70.GENE3D); IPR044034 (PFAM); G3DSA:1.10.8.10 (GENE3D); mobidb-lite (MOBIDB_LITE); mobidb-lite (MOBIDB_LITE); mobidb-lite (MOBIDB_LITE); mobidb-lite (MOBIDB_LITE); IPR016641 (PANTHER); IPR002715 (PROSITE_PROFILES); cd14358 (CDD)	C:GO:0005854	C:nascent polypeptide-associated complex
EVSurface		DN10420_c0_g1_i2_21363	150	110638	6.66667	10	5	10	5	0.16		major egg antigen	TRUE	[INTERPRO, BLASTED, MAPPED, ANNOTATED]	254	20	4.7979e-90	72.38	1	F:GO:0046872	F:metal ion binding			IPR008978 (G3DSA:2.60.40.GENE3D); IPR002068 (PFAM); IPR008978 (G3DSA:2.60.40.GENE3D); IPR001436 (PANTHER); IPR002068 (PROSITE_PROFILES); cd06526 (CDD); IPR008978 (SUPERFAMILY)	no GO terms	no GO terms
EVSurface		DN10704_c1_g2_i4_35836	113	31685	6.66667	7	3	3	2	0.35	5	hypothetical protein EgrG_000663300	TRUE	[INTERPRO, BLASTED, MAPPED]	222	3	8.59632e-15	53.54	2	C:GO:0016020; C:GO:0016021	C:membrane; C:integral component of membrane			mobidb-lite (MOBIDB_LITE); mobidb-lite (MOBIDB_LITE); mobidb-lite (MOBIDB_LITE)	no GO terms	no GO terms
EVSurface	Immunomodulators	DN12253_c1_g2_i1_68480	149	21884	6.66667	8	4	7	4	0.77		hypothetical transcript	TRUE	[INTERPRO, BLASTED, MAPPED, ANNOTATED]	109	20	2.55189e-41	76.38	5	P:GO:0006662; P:GO:0045454; P:GO:0055114; F:GO:0015035; C:GO:0043231	P:glycerol ether metabolic process; P:cell redox homeostasis; P:oxidation-reduction process; F:protein disulfide oxidoreductase activity; C:intracellular membrane-bounded organelle			PR00421 (PRINTS); IPR013766 (PFAM); IPR005746 (PIRSF); IPR036249 (G3DSA:3.40.30.GENE3D); IPR005746 (TIGRFAM); PTHR46115:SF1 (PANTHER); PTHR46115 (PANTHER); IPR013766 (PROSITE_PROFILES); cd02947 (CDD); IPR036249 (SUPERFAMILY)	P:GO:0006662; P:GO:0045454; F:GO:0015035	P:glycerol ether metabolic process; P:cell redox homeostasis; F:protein disulfide oxidoreductase activity
EVSurface		DN9134_c0_g1_i1_19673	328	38231	6.66667	10	5	8	3	0.39		programmed cell death protein 6	TRUE	[INTERPRO, BLASTED, MAPPED, ANNOTATED]	174	20	8.21011e-101	77.67	1	F:GO:0005509	F:calcium ion binding			IPR002048 (PFAM); IPR002048 (PFAM); G3DSA:1.10.238.10 (GENE3D); IPR002048 (PFAM); PTHR46212 (PANTHER); PTHR46212:SF4 (PANTHER); IPR018247 (PROSITE_PATTERNS); IPR018247 (PROSITE_PATTERNS); IPR002048 (PROSITE_PROFILES); IPR002048 (PROSITE_PROFILES); IPR002048 (PROSITE_PROFILES); IPR002048 (PROSITE_PROFILES); cd16180 (CDD); IPR011992 (SUPERFAMILY)	F:GO:0005509	F:calcium ion binding
EVSurface		DN9858_c0_g1_i2_76388	167	85325	6.66667	10	3	10	3	0.12		synaptotagmin protein 4	TRUE	[INTERPRO, BLASTED, MAPPED, ANNOTATED]	650	20	0	72.9	3	P:GO:0006886; F:GO:0017137; F:GO:0046872	P:intracellular protein transport; F:Rab GTPase binding; F:metal ion binding			IPR035892 (G3DSA:2.60.40.GENE3D); IPR013083 (G3DSA:3.30.40.GENE3D); IPR041282 (PFAM); IPR035892 (G3DSA:2.60.40.GENE3D); IPR000008 (PFAM); mobidb-lite (MOBIDB_LITE); mobidb-lite (MOBIDB_LITE); mobidb-lite (MOBIDB_LITE); mobidb-lite (MOBIDB_LITE); mobidb-lite (MOBIDB_LITE); mobidb-lite (MOBIDB_LITE); PTHR45716 (PANTHER); IPR000008 (PROSITE_PROFILES); IPR000008 (PROSITE_PROFILES); IPR010911 (PROSITE…	P:GO:0006886; F:GO:0017137	P:intracellular protein transport; F:Rab GTPase binding
EVSurface		DN4028_c0_g1_i1_10743	152	21999	6.33333	10	2	7	2	0.33		calcium-binding protein	TRUE	[INTERPRO, BLASTED, MAPPED, ANNOTATED]	156	20	2.54569e-83	80.99	1	F:GO:0005509	F:calcium ion binding			G3DSA:1.10.238.10 (GENE3D); IPR002048 (PFAM); G3DSA:1.10.238.10 (GENE3D); PTHR46212 (PANTHER); IPR018247 (PROSITE_PATTERNS); IPR018247 (PROSITE_PATTERNS); IPR018247 (PROSITE_PATTERNS); IPR002048 (PROSITE_PROFILES); IPR002048 (PROSITE_PROFILES); IPR002048 (PROSITE_PROFILES); IPR002048 (PROSITE_PROFILES); IPR002048 (CDD); IPR011992 (SUPERFAMILY)	F:GO:0005509	F:calcium ion binding
EVSurface		DN6076_c0_g1_i1_68234	57	48113	6.33333	10	2	9	2	0.14		actin, cytoplasmic 2	TRUE	[INTERPRO, BLASTED, MAPPED, ANNOTATED]	376	20	0	89.32	3	F:GO:0005524; C:GO:0005737; C:GO:0005856	F:ATP binding; C:cytoplasm; C:cytoskeleton			IPR004000 (PRINTS); IPR004000 (PFAM); G3DSA:3.30.420.40 (GENE3D); G3DSA:3.90.640.10 (GENE3D); G3DSA:3.30.420.40 (GENE3D); PTHR11937:SF483 (PANTHER); IPR004000 (PANTHER); IPR004001 (PROSITE_PATTERNS); IPR004001 (PROSITE_PATTERNS); cd00012 (CDD); IPR043129 (SUPERFAMILY); IPR043129 (SUPERFAMILY)	no GO terms	no GO terms
EVSurface		DN6852_c0_g1_i1_38346	100	86974	6.33333	6	2	6	2	0.08		Ribosomal protein S6 kinase beta-2	TRUE	[INTERPRO, BLASTED, MAPPED, ANNOTATED]	640	20	0	81.61	4	P:GO:0006468; F:GO:0004674; F:GO:0005524; C:GO:0016021	P:protein phosphorylation; F:protein serine/threonine kinase activity; F:ATP binding; C:integral component of membrane	EC:2.7.11	Transferring phosphorus-containing groups	G3DSA:3.30.200.20 (GENE3D); IPR017892 (PFAM); IPR000719 (PFAM); G3DSA:1.10.510.10 (GENE3D); mobidb-lite (MOBIDB_LITE); mobidb-lite (MOBIDB_LITE); mobidb-lite (MOBIDB_LITE); mobidb-lite (MOBIDB_LITE); mobidb-lite (MOBIDB_LITE); PTHR24351 (PANTHER); IPR008271 (PROSITE_PATTERNS); IPR017441 (PROSITE_PATTERNS); IPR000719 (PROSITE_PROFILES); IPR000961 (PROSITE_PROFILES); IPR011009 (SUPERFAMILY)	P:GO:0006468; F:GO:0004672; F:GO:0004674; F:GO:0005524	P:protein phosphorylation; F:protein kinase activity; F:protein serine/threonine kinase activity; F:ATP binding
EVSurface		DN7377_c0_g1_i2_18812	173	44179	6.33333	9	4	9	4	0.33		Ras-related protein Rab-27A	TRUE	[INTERPRO, BLASTED, MAPPED, ANNOTATED]	237	20	2.71804e-158	85.15	2	F:GO:0003924; F:GO:0005525	F:GTPase activity; F:GTP binding	EC:3.6.1.15	Nucleoside-triphosphate phosphatase	PR00449 (PRINTS); G3DSA:3.40.50.300 (GENE3D); IPR001806 (PFAM); IPR005225 (TIGRFAM); PTHR47977:SF20 (PANTHER); PTHR47977 (PANTHER); PS51419 (PROSITE_PROFILES); IPR027417 (SUPERFAMILY)	F:GO:0003924; F:GO:0005525	F:GTPase activity; F:GTP binding
EVSurface		DN8186_c0_g2_i1_27974	127	81285	6.33333	9	2	7	2	0.08		ubiquitin C	TRUE	[INTERPRO, BLASTED, MAPPED]	393	20	4.0093e-137	56.12	3	P:GO:0000398; F:GO:0008270; C:GO:0046540	P:mRNA splicing, via spliceosome; F:zinc ion binding; C:U4/U6 x U5 tri-snRNP complex			G3DSA:3.10.20.90 (GENE3D); G3DSA:3.10.20.90 (GENE3D); G3DSA:3.10.20.90 (GENE3D); IPR000626 (PFAM); IPR000626 (PFAM); mobidb-lite (MOBIDB_LITE); mobidb-lite (MOBIDB_LITE); mobidb-lite (MOBIDB_LITE); mobidb-lite (MOBIDB_LITE); PTHR10677 (PANTHER); PTHR10677:SF3 (PANTHER); PTHR10677 (PANTHER); IPR000626 (PROSITE_PROFILES); IPR000626 (PROSITE_PROFILES); IPR000626 (PROSITE_PROFILES); cd17039 (CDD); cd…	F:GO:0005515	F:protein binding
EVSurface		DN8561_c0_g2_i1_15325	100	74732	6.33333	9	2	8	2	0.09		glucose 6 phosphate 1 dehydrogenase	TRUE	[INTERPRO, BLASTED, MAPPED, ANNOTATED]	541	20	0	84.09	4	P:GO:0006006; P:GO:0006098; F:GO:0004345; F:GO:0050661	P:glucose metabolic process; P:pentose-phosphate shunt; F:glucose-6-phosphate dehydrogenase activity; F:NADP binding	EC:1.1.1.49	Glucose-6-phosphate dehydrogenase (NADP(+))	IPR001282 (PRINTS); G3DSA:3.30.360.10 (GENE3D); G3DSA:3.40.50.720 (GENE3D); IPR001282 (PIRSF); IPR001282 (TIGRFAM); IPR022675 (PFAM); IPR022674 (PFAM); PTHR23429:SF0 (PANTHER); IPR001282 (PANTHER); IPR019796 (PROSITE_PATTERNS); IPR001282 (HAMAP); IPR036291 (SUPERFAMILY); SSF55347 (SUPERFAMILY)	P:GO:0006006; P:GO:0055114; F:GO:0004345; F:GO:0016614; F:GO:0050661	P:glucose metabolic process; P:oxidation-reduction process; F:glucose-6-phosphate dehydrogenase activity; F:oxidoreductase activity, acting on CH-OH group of donors; F:NADP binding
EVSurface		DN9064_c0_g2_i1_9660	67	63650	6.33333	10	1	9	1	0.05		calcium binding protein 39	TRUE	[INTERPRO, BLASTED, MAPPED, ANNOTATED]	356	20	0	88.66	1	C:GO:0016021	C:integral component of membrane			Coil (COILS); IPR013878 (PFAM); IPR011989 (G3DSA:1.25.10.GENE3D); PTHR10182:SF3 (PANTHER); IPR013878 (PANTHER); IPR016024 (SUPERFAMILY)	no GO terms	no GO terms
EVSurface		DN9824_c0_g1_i1_37906	241	52456	6.33333	3	3	2	2	0.2	3	charged multivesicular body protein 5	TRUE	[INTERPRO, BLASTED, MAPPED, ANNOTATED]	221	20	2.12003e-119	78.31	1	P:GO:0007034	P:vacuolar transport			Coil (COILS); IPR005024 (PFAM); mobidb-lite (MOBIDB_LITE); mobidb-lite (MOBIDB_LITE); PTHR22761 (PANTHER); PTHR22761:SF69 (PANTHER)	P:GO:0007034	P:vacuolar transport
EVSurface		DN10565_c0_g1_i2_3141	147	60227	6	10	4	8	4	0.24		Alpha N acetylgalactosaminidase	TRUE	[INTERPRO, BLASTED, MAPPED, ANNOTATED]	421	20	0	74.22	3	P:GO:0005975; F:GO:0004553; C:GO:0016020	P:carbohydrate metabolic process; F:hydrolase activity, hydrolyzing O-glycosyl compounds; C:membrane			IPR002241 (PRINTS); IPR013780 (G3DSA:2.60.40.GENE3D); IPR013785 (G3DSA:3.20.20.GENE3D); IPR035373 (PFAM); IPR002241 (PFAM); PTHR11452:SF58 (PANTHER); IPR002241 (PANTHER); IPR000111 (PROSITE_PATTERNS); IPR002241 (CDD); SSF51011 (SUPERFAMILY); IPR017853 (SUPERFAMILY)	P:GO:0005975; F:GO:0003824; F:GO:0004553	P:carbohydrate metabolic process; F:catalytic activity; F:hydrolase activity, hydrolyzing O-glycosyl compounds
EVSurface		DN10595_c0_g1_i19_3441	67	83076	6	10	3	9	2	0.08		tyrosine protein kinase csk	TRUE	[INTERPRO, BLASTED, MAPPED, ANNOTATED]	716	20	5.44311e-133	65.81	2	P:GO:0006468; F:GO:0004672	P:protein phosphorylation; F:protein kinase activity			Coil (COILS); IPR001245 (PRINTS); IPR001245 (PFAM); G3DSA:1.10.510.10 (GENE3D); mobidb-lite (MOBIDB_LITE); mobidb-lite (MOBIDB_LITE); mobidb-lite (MOBIDB_LITE); mobidb-lite (MOBIDB_LITE); mobidb-lite (MOBIDB_LITE); mobidb-lite (MOBIDB_LITE); mobidb-lite (MOBIDB_LITE); PTHR24416 (PANTHER); IPR017441 (PROSITE_PATTERNS); IPR008266 (PROSITE_PATTERNS); IPR000719 (PROSITE_PROFILES); cd00192 (CDD); IPR0…	P:GO:0006468; F:GO:0004672; F:GO:0005524	P:protein phosphorylation; F:protein kinase activity; F:ATP binding
EVSurface		DN10922_c1_g1_i5_14239	84	46870	6	9	2	9	2	0.15		Deoxyhypusine hydroxylase	TRUE	[INTERPRO, BLASTED, MAPPED, ANNOTATED]	386	20	6.89919e-143	67.85	4	P:GO:0008612; P:GO:0055114; F:GO:0019135; F:GO:0046872	P:peptidyl-lysine modification to peptidyl-hypusine; P:oxidation-reduction process; F:deoxyhypusine monooxygenase activity; F:metal ion binding	EC:1.14.99.29	Deoxyhypusine monooxygenase	IPR011989 (G3DSA:1.25.10.GENE3D); IPR004155 (PFAM); PTHR12697:SF34 (PANTHER); PTHR12697 (PANTHER); IPR016024 (SUPERFAMILY)	no GO terms	no GO terms
EVSurface		DN11187_c0_g1_i2_48677	310	33194	6	10	8	6	4	0.77		endophilin B2	TRUE	[INTERPRO, BLASTED, MAPPED]	222	13	3.93802e-58	49.26	1	C:GO:0005737	C:cytoplasm			Coil (COILS); Coil (COILS); IPR004148 (PFAM); IPR027267 (G3DSA:1.20.1270.GENE3D); mobidb-lite (MOBIDB_LITE); mobidb-lite (MOBIDB_LITE); IPR027267 (SUPERFAMILY)	F:GO:0005515; C:GO:0005737	F:protein binding; C:cytoplasm
EVSurface		DN11676_c0_g1_i1_42896	76	61498	6	5	1	4	1	0.05		Excitatory amino acid transporter	TRUE	[INTERPRO, BLASTED, MAPPED, ANNOTATED]	483	20	0	77.04	3	P:GO:0055085; F:GO:0015293; C:GO:0016021	P:transmembrane transport; F:symporter activity; C:integral component of membrane			PR00173 (PRINTS); IPR001991 (PFAM); IPR036458 (G3DSA:1.10.3860.GENE3D); PTHR11958 (PANTHER); IPR036458 (SUPERFAMILY)	F:GO:0015293; C:GO:0016021	F:symporter activity; C:integral component of membrane
EVSurface		DN12278_c0_g6_i1_68615	405	83102	6	12	7	8	4	0.26		solute carrier family 5	TRUE	[INTERPRO, BLASTED, MAPPED, ANNOTATED]	693	20	0	78.96	3	P:GO:0055085; F:GO:0022857; C:GO:0016021	P:transmembrane transport; F:transmembrane transporter activity; C:integral component of membrane			Coil (COILS); IPR001734 (PFAM); IPR001734 (TIGRFAM); IPR038377 (G3DSA:1.20.1730.GENE3D); PTHR11819 (PANTHER); IPR001734 (PROSITE_PROFILES)	P:GO:0055085; F:GO:0022857; C:GO:0016020	P:transmembrane transport; F:transmembrane transporter activity; C:membrane
EVSurface		DN7817_c0_g1_i1_51569	256	38349	6	11	6	8	4	0.64		expressed conserved protein	TRUE	[INTERPRO, BLASTED]	253	20	5.54595e-32	59.01						Coil (COILS); Coil (COILS); mobidb-lite (MOBIDB_LITE); mobidb-lite (MOBIDB_LITE); mobidb-lite (MOBIDB_LITE); mobidb-lite (MOBIDB_LITE)	no GO terms	no GO terms
EVSurface		DN8064_c0_g1_i1_68336	120	16913	6	10	6	4	2	0.73		Uncharacterised
EVSurface		DN8458_c0_g1_i1_7706	336	50247	6	8	5	6	3	0.37		Secretory carrier-associated membrane protein	TRUE	[INTERPRO, BLASTED, MAPPED, ANNOTATED]	315	20	6.71144e-164	73.31	2	P:GO:0015031; C:GO:0016021	P:protein transport; C:integral component of membrane			Coil (COILS); IPR007273 (PFAM); mobidb-lite (MOBIDB_LITE); mobidb-lite (MOBIDB_LITE); IPR007273 (PANTHER); PTHR10687:SF2 (PANTHER)	P:GO:0015031; C:GO:0016021	P:protein transport; C:integral component of membrane
EVSurface		DN8513_c0_g1_i1_51818	122	23775	6	4	2	4	2	0.3	2	Calcium binding protein	TRUE	[INTERPRO, BLASTED, MAPPED, ANNOTATED]	156	20	9.70025e-70	73.5	1	F:GO:0005509	F:calcium ion binding			G3DSA:1.10.238.10 (GENE3D); IPR002048 (PFAM); G3DSA:1.10.238.10 (GENE3D); PTHR10827 (PANTHER); IPR018247 (PROSITE_PATTERNS); IPR002048 (PROSITE_PROFILES); IPR002048 (PROSITE_PROFILES); IPR002048 (PROSITE_PROFILES); IPR002048 (CDD); IPR011992 (SUPERFAMILY)	F:GO:0005509	F:calcium ion binding
EVSurface		DN8663_c0_g1_i1_64042	157	21190	6	7	4	6	3	0.8		calcium-binding protein	TRUE	[INTERPRO, BLASTED, MAPPED, ANNOTATED]	140	20	4.34109e-77	81.24	1	F:GO:0005509	F:calcium ion binding			G3DSA:1.10.238.10 (GENE3D); IPR002048 (PFAM); G3DSA:1.10.238.10 (GENE3D); PTHR46212:SF3 (PANTHER); PTHR46212 (PANTHER); IPR018247 (PROSITE_PATTERNS); IPR018247 (PROSITE_PATTERNS); IPR002048 (PROSITE_PROFILES); IPR002048 (PROSITE_PROFILES); IPR002048 (PROSITE_PROFILES); IPR002048 (PROSITE_PROFILES); IPR002048 (CDD); IPR011992 (SUPERFAMILY)	F:GO:0005509	F:calcium ion binding
EVSurface		DN8719_c0_g1_i1_13907	390	28403	6	8	6	5	3	0.56		Calcium binding protein	TRUE	[INTERPRO, BLASTED, MAPPED, ANNOTATED]	162	20	3.58091e-76	74.38	1	F:GO:0005509	F:calcium ion binding			IPR002048 (PFAM); G3DSA:1.10.238.10 (GENE3D); G3DSA:1.10.238.10 (GENE3D); PTHR23050:SF382 (PANTHER); PTHR23050 (PANTHER); IPR018247 (PROSITE_PATTERNS); IPR018247 (PROSITE_PATTERNS); IPR018247 (PROSITE_PATTERNS); IPR002048 (PROSITE_PROFILES); IPR002048 (PROSITE_PROFILES); IPR002048 (PROSITE_PROFILES); IPR002048 (CDD); IPR002048 (CDD); IPR011992 (SUPERFAMILY)	F:GO:0005509	F:calcium ion binding
EVSurface		DN9249_c0_g1_i1_7430	71	25344	6	10	2	8	2	0.28		fatty acid binding protein FABP2	TRUE	[INTERPRO, BLASTED, MAPPED]	133	20	2.5755e-39	63.58	1	F:GO:0008289	F:lipid binding			IPR000463 (PRINTS); IPR000566 (PFAM); IPR012674 (G3DSA:2.40.128.GENE3D); IPR033073 (PTHR11955:PANTHER); IPR031259 (PANTHER); IPR012674 (SUPERFAMILY)	P:GO:0050727; F:GO:0005504; F:GO:0008289	P:regulation of inflammatory response; F:fatty acid binding; F:lipid binding
EVSurface		DN9330_c0_g1_i1_76124	170	63715	6	11	5	10	4	0.29		expressed protein	TRUE	[INTERPRO, BLASTED]	366	14	7.82771e-156	70.84						mobidb-lite (MOBIDB_LITE); mobidb-lite (MOBIDB_LITE); mobidb-lite (MOBIDB_LITE); mobidb-lite (MOBIDB_LITE); mobidb-lite (MOBIDB_LITE); mobidb-lite (MOBIDB_LITE); mobidb-lite (MOBIDB_LITE)	no GO terms	no GO terms
EVSurface		DN9431_c0_g1_i1_5402	216	65481	6	11	5	10	5	0.28		Protein disulfide-isomerase	TRUE	[INTERPRO, BLASTED, MAPPED, ANNOTATED]	484	20	0	77.76	5	P:GO:0006457; P:GO:0034976; P:GO:0045454; F:GO:0003756; C:GO:0005783	P:protein folding; P:response to endoplasmic reticulum stress; P:cell redox homeostasis; F:protein disulfide isomerase activity; C:endoplasmic reticulum	EC:5.3.4.1	Protein disulfide-isomerase	PR00421 (PRINTS); PF13848 (PFAM); IPR005788 (TIGRFAM); IPR005792 (TIGRFAM); IPR013766 (PFAM); IPR036249 (G3DSA:3.40.30.GENE3D); IPR036249 (G3DSA:3.40.30.GENE3D); IPR036249 (G3DSA:3.40.30.GENE3D); IPR036249 (G3DSA:3.40.30.GENE3D); PTHR18929 (PANTHER); PTHR18929:SF101 (PANTHER); IPR017937 (PROSITE_PATTERNS); IPR017937 (PROSITE_PATTERNS); IPR013766 (PROSITE_PROFILES); IPR013766 (PROSITE_PROFILES); c…	F:GO:0003756	F:protein disulfide isomerase activity
EVSurface		DN9572_c0_g1_i3_14739	405	23059	6	9	8	7	6	1.96		Calcium binding protein	TRUE	[INTERPRO, BLASTED, MAPPED, ANNOTATED]	146	20	2.71465e-79	79.14	1	F:GO:0005509	F:calcium ion binding			G3DSA:1.10.238.10 (GENE3D); G3DSA:1.10.238.10 (GENE3D); IPR002048 (PFAM); PTHR46212 (PANTHER); IPR018247 (PROSITE_PATTERNS); IPR018247 (PROSITE_PATTERNS); IPR018247 (PROSITE_PATTERNS); IPR002048 (PROSITE_PROFILES); IPR002048 (PROSITE_PROFILES); IPR002048 (PROSITE_PROFILES); IPR011992 (SUPERFAMILY)	F:GO:0005509	F:calcium ion binding
EVSurface		DN10222_c0_g1_i2_1259	236	43377	5.66667	10	5	9	4	0.44		alpha tocopherol transfer protein	TRUE	[INTERPRO, BLASTED]	260	20	9.77975e-134	73.42						IPR001251 (PFAM); IPR036865 (G3DSA:3.40.525.GENE3D); PTHR10174 (PANTHER); IPR001251 (PROSITE_PROFILES); IPR001251 (CDD); IPR036865 (SUPERFAMILY)	no GO terms	no GO terms
EVSurface		DN10715_c0_g2_i2_47603	107	43829	5.66667	10	3	9	2	0.24		putative carbonic anhydrase II (carbonate dehydratase II)	TRUE	[INTERPRO, BLASTED, MAPPED, ANNOTATED]	157	20	1.7344e-78	69.58	2	F:GO:0004089; F:GO:0008270	F:carbonate dehydratase activity; F:zinc ion binding	EC:4.2.1.1	Carbonic anhydrase	IPR036398 (G3DSA:3.10.200.GENE3D); IPR001148 (PFAM); PTHR18952:SF120 (PANTHER); IPR023561 (PANTHER); IPR018338 (PROSITE_PATTERNS); IPR001148 (PROSITE_PROFILES); IPR036398 (SUPERFAMILY)	F:GO:0004089; F:GO:0008270	F:carbonate dehydratase activity; F:zinc ion binding
EVSurface		DN11948_c3_g1_i5_58176	305	35670	5.66667	10	5	8	3	0.43		multidrug resistance protein 1	TRUE	[INTERPRO, BLASTED, MAPPED, ANNOTATED]	213	20	1.02089e-128	86.14	6	P:GO:0015721; P:GO:0055085; F:GO:0005524; F:GO:0016887; F:GO:0042626; C:GO:0016021	P:bile acid and bile salt transport; P:transmembrane transport; F:ATP binding; F:ATPase activity; F:ATPase-coupled transmembrane transporter activity; C:integral component of membrane	EC:3.6.1.3; EC:3.6.1.15	Adenosinetriphosphatase; Nucleoside-triphosphate phosphatase	IPR003439 (PFAM); G3DSA:3.40.50.300 (GENE3D); IPR039421 (PANTHER); PTHR24221:SF501 (PANTHER); IPR017871 (PROSITE_PATTERNS); IPR003439 (PROSITE_PROFILES); IPR027417 (SUPERFAMILY)	F:GO:0005524; F:GO:0016887	F:ATP binding; F:ATPase activity
EVSurface		DN2461_c0_g1_i1_68950	139	20356	5.66667	6	3	6	3	0.58	3	Hyp2p	TRUE	[INTERPRO, BLASTED, MAPPED, ANNOTATED]	156	20	3.8594e-77	78.29	6	P:GO:0006413; P:GO:0045901; P:GO:0045905; F:GO:0003743; F:GO:0003746; F:GO:0043022	P:translational initiation; P:positive regulation of translational elongation; P:positive regulation of translational termination; F:translation initiation factor activity; F:translation elongation factor activity; F:ribosome binding			IPR020189 (PFAM); IPR014722 (G3DSA:2.30.30.GENE3D); IPR001884 (TIGRFAM); IPR001884 (PIRSF); G3DSA:2.40.50.140 (GENE3D); IPR013185 (PFAM); PTHR11673:SF6 (PANTHER); IPR001884 (PANTHER); IPR019769 (PROSITE_PATTERNS); IPR012340 (SUPERFAMILY); IPR008991 (SUPERFAMILY)	P:GO:0045901; P:GO:0045905; F:GO:0003723; F:GO:0003746; F:GO:0043022	P:positive regulation of translational elongation; P:positive regulation of translational termination; F:RNA binding; F:translation elongation factor activity; F:ribosome binding
EVSurface		DN5384_c0_g1_i1_23626	189	40525	5.66667	6	4	5	3	0.37	4	charged multivesicular body protein 4b-like	TRUE	[INTERPRO, BLASTED, MAPPED, ANNOTATED]	216	20	2.02694e-92	71.5	1	P:GO:0007034	P:vacuolar transport			IPR005024 (PFAM); G3DSA:1.10.287.1060 (GENE3D); mobidb-lite (MOBIDB_LITE); PTHR22761 (PANTHER); PTHR22761:SF14 (PANTHER)	P:GO:0007034	P:vacuolar transport
EVSurface		DN7236_c0_g1_i2_8180	62	48564	5.66667	8	2	7	2	0.14		Arp2/3 complex 34 kDa subunit	TRUE	[INTERPRO, BLASTED, MAPPED, ANNOTATED]	334	20	0	79.38	4	P:GO:0034314; F:GO:0003779; C:GO:0005737; C:GO:0005885	P:Arp2/3 complex-mediated actin nucleation; F:actin binding; C:cytoplasm; C:Arp2/3 protein complex			IPR034666 (G3DSA:3.30.1460.GENE3D); IPR007188 (PFAM); IPR034666 (G3DSA:3.30.1460.GENE3D); PTHR12058:SF0 (PANTHER); IPR007188 (PANTHER); IPR034666 (SUPERFAMILY); IPR034666 (SUPERFAMILY)	P:GO:0030041; P:GO:0030833; P:GO:0034314; C:GO:0005885; C:GO:0015629	P:actin filament polymerization; P:regulation of actin filament polymerization; P:Arp2/3 complex-mediated actin nucleation; C:Arp2/3 protein complex; C:actin cytoskeleton
EVSurface		DN7797_c0_g1_i1_11009	135	41445	5.66667	9	4	5	3	0.36		ADP-ribosylation factor	TRUE	[INTERPRO, BLASTED, MAPPED, ANNOTATED]	182	20	4.01092e-129	94.64	5	P:GO:0006886; P:GO:0016192; F:GO:0005525; C:GO:0005794; C:GO:0005886	P:intracellular protein transport; P:vesicle-mediated transport; F:GTP binding; C:Golgi apparatus; C:plasma membrane			Coil (COILS); IPR006689 (PRINTS); G3DSA:3.40.50.300 (GENE3D); IPR006689 (PFAM); IPR005225 (TIGRFAM); PTHR11711:SF383 (PANTHER); PTHR11711 (PANTHER); PS51417 (PROSITE_PROFILES); cd04150 (CDD); IPR027417 (SUPERFAMILY)	F:GO:0005525	F:GTP binding
EVSurface		DN7976_c0_g1_i1_19959	143	33870	5.66667	6	3	5	3	0.32		Myophilin	TRUE	[INTERPRO, BLASTED, MAPPED, ANNOTATED]	222	20	5.6628e-125	85.64	1	C:GO:0016021	C:integral component of membrane			IPR036872 (G3DSA:1.10.418.GENE3D); IPR000557 (PFAM); IPR001715 (PFAM); PTHR47385:SF3 (PANTHER); PTHR47385 (PANTHER); IPR000557 (PROSITE_PROFILES); IPR001715 (PROSITE_PROFILES); IPR036872 (SUPERFAMILY)	F:GO:0005515	F:protein binding
EVSurface		DN8022_c0_g1_i2_30660	112	41636	5.66667	9	4	8	4	0.36	1	syntaxin 1a	TRUE	[INTERPRO, BLASTED, MAPPED, ANNOTATED]	290	20	4.00977e-130	77.6	6	P:GO:0006886; P:GO:0017157; P:GO:0061025; F:GO:0000149; F:GO:0005484; C:GO:0016021	P:intracellular protein transport; P:regulation of exocytosis; P:membrane fusion; F:SNARE binding; F:SNAP receptor activity; C:integral component of membrane			Coil (COILS); IPR000727 (PFAM); G3DSA:1.20.58.70 (GENE3D); G3DSA:1.20.5.110 (GENE3D); IPR006011 (PFAM); PTHR19957 (PANTHER); IPR028669 (PTHR19957:PANTHER); IPR006012 (PROSITE_PATTERNS); IPR000727 (PROSITE_PROFILES); IPR006011 (CDD); IPR010989 (SUPERFAMILY)	P:GO:0006886; P:GO:0016192; P:GO:0017157; F:GO:0000149; F:GO:0005484; C:GO:0016020; C:GO:0016021	P:intracellular protein transport; P:vesicle-mediated transport; P:regulation of exocytosis; F:SNARE binding; F:SNAP receptor activity; C:membrane; C:integral component of membrane
EVSurface		DN1715_c0_g1_i1_4051	127	21983	5.33333	4	2	4	2	0.33		peptidylprolyl isomerase	TRUE	[INTERPRO, BLASTED, MAPPED, ANNOTATED]	166	20	6.53312e-94	85.47	5	P:GO:0000413; P:GO:0006457; F:GO:0003755; C:GO:0005737; C:GO:0016021	P:protein peptidyl-prolyl isomerization; P:protein folding; F:peptidyl-prolyl cis-trans isomerase activity; C:cytoplasm; C:integral component of membrane	EC:5.2.1.8	Peptidylprolyl isomerase	IPR002130 (PRINTS); IPR024936 (PIRSF); IPR029000 (G3DSA:2.40.100.GENE3D); IPR002130 (PFAM); PTHR11071 (PANTHER); PTHR11071:SF503 (PANTHER); IPR020892 (PROSITE_PATTERNS); IPR002130 (PROSITE_PROFILES); cd01926 (CDD); IPR029000 (SUPERFAMILY)	P:GO:0000413; P:GO:0006457; F:GO:0003755	P:protein peptidyl-prolyl isomerization; P:protein folding; F:peptidyl-prolyl cis-trans isomerase activity
EVSurface		DN4137_c0_g1_i1_15271	286	42814	5.33333	7	4	6	3	0.35		charged multivesicular body protein 2a	TRUE	[INTERPRO, BLASTED, MAPPED, ANNOTATED]	229	20	1.09897e-134	83.38	1	P:GO:0007034	P:vacuolar transport			Coil (COILS); Coil (COILS); IPR005024 (PFAM); mobidb-lite (MOBIDB_LITE); PTHR10476:SF4 (PANTHER); PTHR10476 (PANTHER)	P:GO:0007034	P:vacuolar transport
EVSurface		DN5563_c0_g1_i1_10438	285	13589	5.33333	5	3	4	2	0.96		Uncharacterised
EVSurface		DN7430_c0_g1_i1_2817	230	36479	5.33333	10	5	9	4	0.54	2	charged multivesicular body protein 1b	TRUE	[INTERPRO, BLASTED, MAPPED, ANNOTATED]	206	20	2.19966e-131	85.14	1	P:GO:0007034	P:vacuolar transport			Coil (COILS); IPR042277 (G3DSA:1.20.1260.GENE3D); IPR005024 (PFAM); mobidb-lite (MOBIDB_LITE); mobidb-lite (MOBIDB_LITE); PTHR10476:SF2 (PANTHER); PTHR10476 (PANTHER)	P:GO:0007034	P:vacuolar transport
EVSurface		DN8690_c0_g1_i1_49901	158	37848	5.33333	9	5	8	4	0.52		calcium binding protein p22	TRUE	[INTERPRO, BLASTED, MAPPED, ANNOTATED]	105	20	8.76092e-68	92.5	4	P:GO:0006468; F:GO:0004672; F:GO:0005509; F:GO:0005524	P:protein phosphorylation; F:protein kinase activity; F:calcium ion binding; F:ATP binding			IPR002048 (PFAM); G3DSA:1.10.238.10 (GENE3D); PTHR46002 (PANTHER); PTHR46002:SF2 (PANTHER); IPR018247 (PROSITE_PATTERNS); IPR002048 (PROSITE_PROFILES); IPR002048 (PROSITE_PROFILES); IPR002048 (CDD); IPR011992 (SUPERFAMILY)	F:GO:0005509	F:calcium ion binding
EVSurface	Immunomodulators	DN8903_c0_g1_i1_52178	198	60589	5.33333	11	5	9	4	0.24		Putative aminopeptidase W07G4.4	TRUE	[INTERPRO, BLASTED, MAPPED, ANNOTATED]	514	20	0	81.11	5	P:GO:0006508; F:GO:0004177; F:GO:0008235; F:GO:0030145; C:GO:0005737	P:proteolysis; F:aminopeptidase activity; F:metalloexopeptidase activity; F:manganese ion binding; C:cytoplasm	EC:3.4.11; EC:3.4.11.21; EC:3.4.11.6; EC:3.4.11.5; EC:3.4.11.9	Acting on peptide bonds (peptidases); Aspartyl aminopeptidase; Aminopeptidase B; Prolyl aminopeptidase; Xaa-Pro aminopeptidase	IPR011356 (PRINTS); G3DSA:3.40.630.10 (GENE3D); IPR000819 (PFAM); IPR011356 (PANTHER); PTHR11963:SF23 (PANTHER); IPR000819 (PROSITE_PATTERNS); IPR043472 (SUPERFAMILY); SSF53187 (SUPERFAMILY)	P:GO:0006508; P:GO:0019538; F:GO:0030145; F:GO:0070006; C:GO:0005737	P:proteolysis; P:protein metabolic process; F:manganese ion binding; F:metalloaminopeptidase activity; C:cytoplasm
EVSurface		DN10797_c0_g1_i4_22231	75	35156	5	4	2	4	2	0.2		Uncharacterised
EVSurface		DN10981_c0_g3_i1_14175	106	48523	5	9	2	9	2	0.14		F-actin-capping protein subunit alpha	TRUE	[INTERPRO, BLASTED, MAPPED, ANNOTATED]	308	20	0	73.21	3	P:GO:0051016; F:GO:0003779; C:GO:0008290	P:barbed-end actin filament capping; F:actin binding; C:F-actin capping protein complex			IPR002189 (PRINTS); IPR002189 (PFAM); IPR042276 (G3DSA:2.40.160.GENE3D); IPR042489 (G3DSA:1.20.1290.GENE3D); IPR002189 (PANTHER); IPR037282 (SUPERFAMILY)	P:GO:0051016; C:GO:0008290	P:barbed-end actin filament capping; C:F-actin capping protein complex
EVSurface		DN14219_c0_g1_i1_37953	68	39828	5	5	2	5	2	0.17		Basement membrane-specific heparan sulfate proteoglycan core protein	TRUE	[INTERPRO, BLASTED, MAPPED, ANNOTATED]	356	20	0	66.99	1	C:GO:0016021	C:integral component of membrane			IPR013783 (G3DSA:2.60.40.GENE3D); PF13927 (PFAM); IPR013783 (G3DSA:2.60.40.GENE3D); IPR007110 (PROSITE_PROFILES); IPR007110 (PROSITE_PROFILES); cd00096 (CDD); IPR036179 (SUPERFAMILY); IPR036179 (SUPERFAMILY)	no GO terms	no GO terms
EVSurface		DN3788_c0_g1_i1_50567	65	15303	5	6	2	4	1	0.49		Uncharacterised
EVSurface		DN4639_c0_g1_i1_63310	117	45667	5	8	2	8	2	0.15		Hsc70-interacting protein	TRUE	[INTERPRO, BLASTED, MAPPED, ANNOTATED]	359	20	1.83394e-178	70.2	2	P:GO:0009987; F:GO:0046983	P:cellular process; F:protein dimerization activity			Coil (COILS); Coil (COILS); IPR034649 (PFAM); IPR011990 (G3DSA:1.25.40.GENE3D); G3DSA:1.10.260.100 (GENE3D); IPR041243 (PFAM); mobidb-lite (MOBIDB_LITE); mobidb-lite (MOBIDB_LITE); mobidb-lite (MOBIDB_LITE); PTHR45883:SF2 (PANTHER); PTHR45883 (PANTHER); IPR013026 (PROSITE_PROFILES); IPR034649 (CDD); IPR011990 (SUPERFAMILY)	F:GO:0005515; F:GO:0046983	F:protein binding; F:protein dimerization activity
EVSurface		DN4718_c0_g1_i1_46511	133	34979	5	10	5	10	5	0.57		pdz domain containing protein	TRUE	[INTERPRO, BLASTED]	160	20	1.07797e-76	69.43						IPR001478 (PFAM); IPR036034 (G3DSA:2.30.42.GENE3D); PTHR14191:SF22 (PANTHER); PTHR14191 (PANTHER); IPR001478 (PROSITE_PROFILES); cd00992 (CDD); IPR036034 (SUPERFAMILY)	F:GO:0005515	F:protein binding
EVSurface		DN7114_c0_g1_i1_34841	120	50180	5	5	2	5	2	0.14		F actin capping protein subunit beta	TRUE	[INTERPRO, BLASTED, MAPPED, ANNOTATED]	291	20	0	83.64	4	P:GO:0051016; F:GO:0003779; C:GO:0005737; C:GO:0008290	P:barbed-end actin filament capping; F:actin binding; C:cytoplasm; C:F-actin capping protein complex			IPR001698 (PRINTS); IPR043175 (G3DSA:1.20.58.GENE3D); IPR042276 (G3DSA:2.40.160.GENE3D); IPR001698 (PFAM); IPR001698 (PANTHER); IPR037282 (SUPERFAMILY)	P:GO:0051016; C:GO:0008290	P:barbed-end actin filament capping; C:F-actin capping protein complex
EVSurface		DN7545_c0_g1_i1_75976	115	52372	5	10	4	10	4	0.28		dnaJ subfamily A	TRUE	[INTERPRO, BLASTED, MAPPED, ANNOTATED]	397	20	0	80.15	6	P:GO:0006457; P:GO:0009408; F:GO:0005524; F:GO:0031072; F:GO:0046872; F:GO:0051082	P:protein folding; P:response to heat; F:ATP binding; F:heat shock protein binding; F:metal ion binding; F:unfolded protein binding			IPR001623 (PRINTS); IPR001305 (PFAM); G3DSA:2.10.230.10 (GENE3D); G3DSA:2.60.260.20 (GENE3D); IPR001623 (PFAM); IPR036869 (G3DSA:1.10.287.GENE3D); IPR002939 (PFAM); mobidb-lite (MOBIDB_LITE); mobidb-lite (MOBIDB_LITE); PTHR43888 (PANTHER); PTHR43888:SF9 (PANTHER); IPR018253 (PROSITE_PATTERNS); IPR001305 (PROSITE_PROFILES); IPR012724 (HAMAP); IPR001623 (PROSITE_PROFILES); IPR001623 (CDD); cd10747 …	P:GO:0006457; P:GO:0009408; F:GO:0005524; F:GO:0031072; F:GO:0051082	P:protein folding; P:response to heat; F:ATP binding; F:heat shock protein binding; F:unfolded protein binding
EVSurface		DN9007_c0_g1_i2_9587	71	54321	5	7	2	6	2	0.13		pdz domain containing protein	TRUE	[INTERPRO, BLASTED]	422	7	5.6999e-82	61.66						IPR036034 (G3DSA:2.30.42.GENE3D); mobidb-lite (MOBIDB_LITE); mobidb-lite (MOBIDB_LITE); mobidb-lite (MOBIDB_LITE); mobidb-lite (MOBIDB_LITE); IPR001478 (PROSITE_PROFILES); cd00992 (CDD); IPR036034 (SUPERFAMILY)	F:GO:0005515	F:protein binding
EVSurface		DN9306_c0_g1_i1_48849	128	27467	5	5	3	4	3	0.41		Actin-related protein 2/3 complex subunit 5-like protein	TRUE	[INTERPRO, BLASTED, MAPPED, ANNOTATED]	147	20	6.90368e-94	76.86	2	P:GO:0034314; C:GO:0005885	P:Arp2/3 complex-mediated actin nucleation; C:Arp2/3 protein complex			IPR006789 (PFAM); IPR036743 (G3DSA:1.25.40.GENE3D); IPR030075 (PTHR12644:PANTHER); IPR006789 (PANTHER); IPR036743 (SUPERFAMILY)	P:GO:0030833; P:GO:0034314; C:GO:0005885; C:GO:0015629	P:regulation of actin filament polymerization; P:Arp2/3 complex-mediated actin nucleation; C:Arp2/3 protein complex; C:actin cytoskeleton
EVSurface		DN10145_c0_g2_i1_74377	67	74607	4.66667	8	1	8	1	0.04		Myosin catalytic light chain LC-1, mantle muscle isoform 3	TRUE	[INTERPRO, BLASTED, MAPPED, ANNOTATED]	156	20	1.09437e-103	93.27	1	F:GO:0005509	F:calcium ion binding			G3DSA:1.10.238.10 (GENE3D); IPR002048 (PFAM); G3DSA:1.10.238.10 (GENE3D); IPR029655 (PTHR23048:PANTHER); PTHR23048 (PANTHER); IPR002048 (PROSITE_PROFILES); IPR002048 (PROSITE_PROFILES); IPR002048 (CDD); IPR011992 (SUPERFAMILY)	F:GO:0005509	F:calcium ion binding
EVSurface		DN10531_c0_g2_i3_29020	207	34607	4.66667	4	2	4	2	0.2		No hit	TRUE	[INTERPRO, NO-BLAST]	240									mobidb-lite (MOBIDB_LITE); mobidb-lite (MOBIDB_LITE); mobidb-lite (MOBIDB_LITE); mobidb-lite (MOBIDB_LITE); mobidb-lite (MOBIDB_LITE)	no GO terms	no GO terms
EVSurface		DN10859_c0_g1_i2_11986	82	25568	4.66667	8	5	8	5	0.85		major vault protein	TRUE	[INTERPRO, BLASTED, MAPPED, ANNOTATED]	145	20	7.29629e-73	87.8	2	P:GO:0015074; F:GO:0003676	P:DNA integration; F:nucleic acid binding			Coil (COILS); IPR039059 (PANTHER); PTHR14165:SF3 (PANTHER)	no GO terms	no GO terms
EVSurface		DN11009_c0_g4_i1_16586	223	27097	4.66667	7	5	5	3	0.79	4	No hit	TRUE	[INTERPRO, NO-BLAST]	165									mobidb-lite (MOBIDB_LITE); mobidb-lite (MOBIDB_LITE); mobidb-lite (MOBIDB_LITE)	no GO terms	no GO terms
EVSurface		DN11676_c0_g2_i3_67958	105	69252	4.66667	5	2	5	2	0.1		unnamed protein product	TRUE	[INTERPRO, BLASTED]	556	20	0	66.42						IPR000008 (PFAM); IPR035892 (G3DSA:2.60.40.GENE3D); IPR035892 (G3DSA:2.60.40.GENE3D); mobidb-lite (MOBIDB_LITE); mobidb-lite (MOBIDB_LITE); mobidb-lite (MOBIDB_LITE); mobidb-lite (MOBIDB_LITE); mobidb-lite (MOBIDB_LITE); mobidb-lite (MOBIDB_LITE); IPR043541 (PANTHER); PS51257 (PROSITE_PROFILES); SSF49562 (SUPERFAMILY); SSF49562 (SUPERFAMILY)	no GO terms	no GO terms
EVSurface		DN12254_c1_g2_i2_43509	228	23895	4.66667	9	5	6	4	0.93		No hit	TRUE	[INTERPRO, NO-BLAST]	188									mobidb-lite (MOBIDB_LITE); mobidb-lite (MOBIDB_LITE); mobidb-lite (MOBIDB_LITE); mobidb-lite (MOBIDB_LITE)	no GO terms	no GO terms
EVSurface		DN12395_c0_g6_i1_39527	229	8973	4.66667	5	4	4	3	2.72		Uncharacterised
EVSurface	Immunomodulators	DN3303_c0_g1_i1_3647	122	26394	4.66667	5	4	4	4	0.61	6	peroxiredoxin 1	TRUE	[INTERPRO, BLASTED, MAPPED, ANNOTATED]	181	20	5.16085e-105	82.54	4	P:GO:0055114; P:GO:0098869; F:GO:0004601; F:GO:0051920	P:oxidation-reduction process; P:cellular oxidant detoxification; F:peroxidase activity; F:peroxiredoxin activity	EC:1.11.1.15; EC:1.11.1.7	Acting on a peroxide as acceptor; Peroxidase	IPR000866 (PFAM); IPR019479 (PFAM); IPR036249 (G3DSA:3.40.30.GENE3D); IPR024706 (PIRSF); PTHR10681:SF154 (PANTHER); PTHR10681 (PANTHER); IPR013766 (PROSITE_PROFILES); cd03015 (CDD); IPR036249 (SUPERFAMILY)	P:GO:0055114; F:GO:0016209; F:GO:0016491; F:GO:0051920	P:oxidation-reduction process; F:antioxidant activity; F:oxidoreductase activity; F:peroxiredoxin activity
EVSurface		DN3503_c0_g1_i1_21223	107	35796	4.66667	6	3	6	3	0.3		calcyphosin protein	TRUE	[INTERPRO, BLASTED, MAPPED, ANNOTATED]	208	20	1.61719e-133	81.51	1	F:GO:0005509	F:calcium ion binding			G3DSA:1.10.238.10 (GENE3D); G3DSA:1.10.238.10 (GENE3D); IPR002048 (PFAM); IPR002048 (PFAM); PTHR10891 (PANTHER); PTHR10891:SF744 (PANTHER); IPR018247 (PROSITE_PATTERNS); IPR018247 (PROSITE_PATTERNS); IPR002048 (PROSITE_PROFILES); IPR002048 (PROSITE_PROFILES); IPR002048 (PROSITE_PROFILES); IPR002048 (PROSITE_PROFILES); IPR002048 (CDD); IPR011992 (SUPERFAMILY)	F:GO:0005509	F:calcium ion binding
EVSurface		DN8120_c0_g1_i1_66053	78	36341	4.66667	7	1	5	1	0.09		universal stress protein	TRUE	[INTERPRO, BLASTED]	175	20	8.62864e-92	76.11						IPR006015 (PRINTS); IPR006016 (PFAM); IPR014729 (G3DSA:3.40.50.GENE3D); PTHR46989 (PANTHER); cd00293 (CDD); SSF52402 (SUPERFAMILY)	no GO terms	no GO terms
EVSurface		DN9428_c0_g1_i2_31343	118	62256	4.66667	8	4	8	4	0.23		expressed conserved protein	TRUE	[INTERPRO, BLASTED]	474	13	4.45629e-122	59.45						Coil (COILS); Coil (COILS); mobidb-lite (MOBIDB_LITE); mobidb-lite (MOBIDB_LITE); mobidb-lite (MOBIDB_LITE); mobidb-lite (MOBIDB_LITE); mobidb-lite (MOBIDB_LITE); mobidb-lite (MOBIDB_LITE)	no GO terms	no GO terms
EVSurface		DN9932_c0_g2_i6_4385	131	47579	4.66667	8	3	6	2	0.22		Uncharacterised
EVSurface		DN10220_c0_g1_i1_40482	72	22202	4.33333	7	3	6	2	0.52		Nucleoside diphosphate kinase	TRUE	[INTERPRO, BLASTED, MAPPED, ANNOTATED]	157	20	5.17688e-98	87.36	7	P:GO:0006165; P:GO:0006183; P:GO:0006228; P:GO:0006241; F:GO:0004550; F:GO:0005524; F:GO:0046872	P:nucleoside diphosphate phosphorylation; P:GTP biosynthetic process; P:UTP biosynthetic process; P:CTP biosynthetic process; F:nucleoside diphosphate kinase activity; F:ATP binding; F:metal ion binding	EC:2.7.4.6	Nucleoside-diphosphate kinase	IPR001564 (PRINTS); IPR036850 (G3DSA:3.30.70.GENE3D); IPR034907 (PFAM); PTHR11349 (PANTHER); PTHR11349:SF91 (PANTHER); IPR023005 (PROSITE_PATTERNS); IPR001564 (HAMAP); cd04413 (CDD); IPR036850 (SUPERFAMILY)	P:GO:0006165; P:GO:0006183; P:GO:0006228; P:GO:0006241; F:GO:0004550	P:nucleoside diphosphate phosphorylation; P:GTP biosynthetic process; P:UTP biosynthetic process; P:CTP biosynthetic process; F:nucleoside diphosphate kinase activity
EVSurface		DN10902_c0_g1_i1_40241	78	68368	4.33333	5	1	5	1	0.05		Dynein intermediate chain	TRUE	[INTERPRO, BLASTED, MAPPED, ANNOTATED]	583	20	0	69.69	6	P:GO:0007018; F:GO:0003777; F:GO:0005524; C:GO:0005737; C:GO:0005868; C:GO:0005874	P:microtubule-based movement; F:microtubule motor activity; F:ATP binding; C:cytoplasm; C:cytoplasmic dynein complex; C:microtubule	EC:3.6.1.15	Nucleoside-triphosphate phosphatase	Coil (COILS); G3DSA:3.40.50.300 (GENE3D); G3DSA:3.40.50.300 (GENE3D); IPR022780 (PFAM); mobidb-lite (MOBIDB_LITE); mobidb-lite (MOBIDB_LITE); mobidb-lite (MOBIDB_LITE); mobidb-lite (MOBIDB_LITE); mobidb-lite (MOBIDB_LITE); mobidb-lite (MOBIDB_LITE); mobidb-lite (MOBIDB_LITE); mobidb-lite (MOBIDB_LITE); mobidb-lite (MOBIDB_LITE); mobidb-lite (MOBIDB_LITE); IPR008467 (PANTHER); cd00009 (CDD); IPR02…	P:GO:0007018; C:GO:0005868	P:microtubule-based movement; C:cytoplasmic dynein complex
EVSurface		DN11233_c0_g1_i4_75082	70	20573	4.33333	4	2	3	2	0.35		Uncharacterised
EVSurface		DN11339_c0_g1_i1_39225	88	58070	4.33333	8	1	8	1	0.06		putative vesicle-associated membrane protein (vamp)	TRUE	[INTERPRO, BLASTED, MAPPED, ANNOTATED]	335	20	0	74.04	2	C:GO:0005789; C:GO:0016021	C:endoplasmic reticulum membrane; C:integral component of membrane			Coil (COILS); IPR013783 (G3DSA:2.60.40.GENE3D); IPR000535 (PFAM); IPR016763 (PIRSF); IPR013783 (G3DSA:2.60.40.GENE3D); PTHR10809:SF12 (PANTHER); IPR016763 (PANTHER); IPR000535 (PROSITE_PROFILES); IPR000535 (PROSITE_PROFILES); IPR008962 (SUPERFAMILY); IPR008962 (SUPERFAMILY)	C:GO:0005789	C:endoplasmic reticulum membrane
EVSurface		DN1464_c0_g1_i1_44183	86	33173	4.33333	4	2	4	2	0.21		Uncharacterised
EVSurface		DN6351_c0_g1_i1_15544	188	57633	4.33333	4	3	4	3	0.18		expressed conserved protein	TRUE	[INTERPRO, BLASTED]	263	20	2.32228e-97	66.53						IPR043798 (PFAM); mobidb-lite (MOBIDB_LITE); mobidb-lite (MOBIDB_LITE); mobidb-lite (MOBIDB_LITE)	no GO terms	no GO terms
EVSurface		DN6770_c0_g1_i1_11489	125	19941	4.33333	5	2	5	2	0.37		Fatty acid-binding protein	TRUE	[INTERPRO, BLASTED, MAPPED]	146	20	1.02101e-29	61.01	1	F:GO:0008289	F:lipid binding			IPR000463 (PRINTS); IPR012674 (G3DSA:2.40.128.GENE3D); IPR031259 (PANTHER); IPR012674 (SUPERFAMILY)	F:GO:0008289	F:lipid binding
EVSurface		DN7561_c0_g2_i1_62481	124	24832	4.33333	7	3	6	2	0.29		calcium-binding protein	TRUE	[INTERPRO, BLASTED, MAPPED, ANNOTATED]	141	20	7.49939e-73	83.23	1	F:GO:0005509	F:calcium ion binding			G3DSA:1.10.238.10 (GENE3D); IPR002048 (PFAM); G3DSA:1.10.238.10 (GENE3D); PTHR46212 (PANTHER); IPR018247 (PROSITE_PATTERNS); IPR018247 (PROSITE_PATTERNS); IPR018247 (PROSITE_PATTERNS); IPR002048 (PROSITE_PROFILES); IPR002048 (PROSITE_PROFILES); IPR002048 (PROSITE_PROFILES); IPR002048 (PROSITE_PROFILES); IPR011992 (SUPERFAMILY)	F:GO:0005509	F:calcium ion binding
EVSurface		DN8318_c0_g2_i1_60411	58	15009	4.33333	6	1	6	1	0.23		Uncharacterised
EVSurface		DN844_c0_g1_i1_57087	53	25311	4.33333	5	1	4	1	0.13		hemicentin 1	TRUE	[INTERPRO, BLASTED, MAPPED, ANNOTATED]	227	20	1.67544e-150	93.53	1	F:GO:0005509	F:calcium ion binding			IPR036465 (G3DSA:3.40.50.GENE3D); PTHR23277:SF107 (PANTHER); PTHR23277 (PANTHER); cd00198 (CDD); IPR036465 (SUPERFAMILY)	no GO terms	no GO terms
EVSurface		DN9054_c0_g1_i1_60146	80	63222	4.33333	7	2	7	2	0.11		expressed conserved protein	TRUE	[INTERPRO, BLASTED]	463	13	0	71.87						mobidb-lite (MOBIDB_LITE); mobidb-lite (MOBIDB_LITE)	no GO terms	no GO terms
EVSurface		DN9223_c0_g1_i1_45948	122	30407	4.33333	9	3	7	1	0.23		No hit	TRUE	[INTERPRO, NO-BLAST]	221									mobidb-lite (MOBIDB_LITE); mobidb-lite (MOBIDB_LITE); mobidb-lite (MOBIDB_LITE); mobidb-lite (MOBIDB_LITE); mobidb-lite (MOBIDB_LITE)	no GO terms	no GO terms
EVSurface		DN9475_c0_g1_i1_18552	162	45180	4.33333	6	3	6	3	0.24		LIM and SH3 domain protein 1	TRUE	[INTERPRO, BLASTED, MAPPED, ANNOTATED]	132	20	2.96139e-61	82.83	1	F:GO:0046872	F:metal ion binding			IPR001452 (PRINTS); G3DSA:2.30.30.40 (GENE3D); IPR001452 (PFAM); mobidb-lite (MOBIDB_LITE); mobidb-lite (MOBIDB_LITE); PTHR46218:SF2 (PANTHER); PTHR46218 (PANTHER); IPR001452 (PROSITE_PROFILES); IPR036028 (SUPERFAMILY)	F:GO:0005515	F:protein binding
EVSurface		DN9923_c0_g2_i1_30262	76	61804	4.33333	8	2	7	2	0.11		Poly(ADP-ribose) glycohydrolase ARH3	TRUE	[INTERPRO, BLASTED, MAPPED, ANNOTATED]	377	20	1.81377e-174	69.96	4	F:GO:0016758; F:GO:0016787; C:GO:0005783; C:GO:0016020	F:transferase activity, transferring hexosyl groups; F:hydrolase activity; C:endoplasmic reticulum; C:membrane			IPR005502 (PFAM); IPR036705 (G3DSA:1.10.4080.GENE3D); PTHR16222 (PANTHER); PTHR16222:SF24 (PANTHER); IPR036705 (SUPERFAMILY)	no GO terms	no GO terms
EVSurface		DN11189_c0_g1_i5_75881	81	62701	4	6	1	6	1	0.05		AChain A, GTPase KRas	TRUE	[INTERPRO, BLASTED, MAPPED, ANNOTATED]	210	20	5.93734e-115	94.86	4	P:GO:0007165; F:GO:0003924; F:GO:0005525; C:GO:0016020	P:signal transduction; F:GTPase activity; F:GTP binding; C:membrane	EC:3.6.1.15	Nucleoside-triphosphate phosphatase	PR00449 (PRINTS); IPR005225 (TIGRFAM); IPR001806 (PFAM); G3DSA:3.40.50.300 (GENE3D); PTHR24070:SF423 (PANTHER); IPR020849 (PANTHER); IPR020849 (PROSITE_PROFILES); cd04138 (CDD); IPR027417 (SUPERFAMILY)	P:GO:0007165; F:GO:0003924; F:GO:0005525; C:GO:0016020	P:signal transduction; F:GTPase activity; F:GTP binding; C:membrane
EVSurface		DN11428_c0_g1_i1_70073	70	23271	4	8	1	7	1	0.14		universal stress protein	TRUE	[INTERPRO, BLASTED]	170	20	1.6696e-64	56.78						IPR006015 (PRINTS); IPR006016 (PFAM); IPR014729 (G3DSA:3.40.50.GENE3D); PTHR31964:SF126 (PANTHER); PTHR31964 (PANTHER); cd00293 (CDD); SSF52402 (SUPERFAMILY)	no GO terms	no GO terms
EVSurface		DN1579_c0_g1_i1_50348	122	38457	4	3	3	3	3	0.28	1	vacuolar protein sorting associated protein 37b	TRUE	[INTERPRO, BLASTED, MAPPED, ANNOTATED]	207	20	5.49153e-91	69.54	3	P:GO:0015031; P:GO:0032509; C:GO:0000813	P:protein transport; P:endosome transport via multivesicular body sorting pathway; C:ESCRT I complex			IPR009851 (PFAM); mobidb-lite (MOBIDB_LITE); PTHR13678 (PANTHER); PTHR13678:SF18 (PANTHER); IPR009851 (PROSITE_PROFILES)	no GO terms	no GO terms
EVSurface		DN4843_c0_g1_i2_54431	75	41037	4	6	3	5	2	0.17		Uncharacterised
EVSurface		DN5087_c0_g1_i1_13124	179	21591	4	4	3	3	2	0.54	2	Uncharacterised
EVSurface		DN6695_c0_g1_i1_51603	72	97061	4	5	2	5	2	0.07		sodium and chloride dependent glycine	TRUE	[INTERPRO, BLASTED, MAPPED, ANNOTATED]	781	20	0	77.91	3	P:GO:0055085; F:GO:0015293; C:GO:0016021	P:transmembrane transport; F:symporter activity; C:integral component of membrane			Coil (COILS); IPR000175 (PRINTS); IPR000175 (PFAM); mobidb-lite (MOBIDB_LITE); mobidb-lite (MOBIDB_LITE); mobidb-lite (MOBIDB_LITE); mobidb-lite (MOBIDB_LITE); IPR000175 (PANTHER); IPR000175 (PROSITE_PATTERNS); IPR000175 (PROSITE_PROFILES); IPR037272 (SUPERFAMILY)	C:GO:0016021	C:integral component of membrane
EVSurface		DN7489_c0_g1_i2_41927	88	24556	4	4	2	4	2	0.29		adenylate kinase	TRUE	[INTERPRO, BLASTED, MAPPED, ANNOTATED]	117	20	2.29776e-69	86.11	4	P:GO:0016310; P:GO:0046940; F:GO:0004017; F:GO:0005524	P:phosphorylation; P:nucleoside monophosphate phosphorylation; F:adenylate kinase activity; F:ATP binding	EC:2.7.4.4; EC:2.7.4.3	Nucleoside-phosphate kinase; Adenylate kinase	IPR000850 (PRINTS); PF00406 (PFAM); G3DSA:3.40.50.300 (GENE3D); IPR000850 (PANTHER); PTHR23359:SF70 (PANTHER); IPR033690 (PROSITE_PATTERNS); IPR000850 (CDD); IPR027417 (SUPERFAMILY)	P:GO:0006139; F:GO:0005524; F:GO:0019205	P:nucleobase-containing compound metabolic process; F:ATP binding; F:nucleobase-containing compound kinase activity
EVSurface		DN9995_c0_g1_i1_17476	150	82064	4	4	2	4	2	0.08		C2 calcium lipid binding region CaLB	TRUE	[INTERPRO, BLASTED, MAPPED, ANNOTATED]	638	20	0	68.39	3	P:GO:0016070; P:GO:0090305; C:GO:0016020	P:RNA metabolic process; P:nucleic acid phosphodiester bond hydrolysis; C:membrane			Coil (COILS); mobidb-lite (MOBIDB_LITE); mobidb-lite (MOBIDB_LITE); mobidb-lite (MOBIDB_LITE); mobidb-lite (MOBIDB_LITE); mobidb-lite (MOBIDB_LITE); mobidb-lite (MOBIDB_LITE); mobidb-lite (MOBIDB_LITE); mobidb-lite (MOBIDB_LITE); mobidb-lite (MOBIDB_LITE); mobidb-lite (MOBIDB_LITE); mobidb-lite (MOBIDB_LITE)	no GO terms	no GO terms
EVSurface		DN10259_c0_g1_i1_40521	204	40256	3.66667	9	3	8	2	0.27		expressed conserved protein	TRUE	[INTERPRO, BLASTED, MAPPED]	229	15	2.79726e-133	81.89	1	P:GO:0006886	P:intracellular protein transport			Coil (COILS); Coil (COILS); mobidb-lite (MOBIDB_LITE); mobidb-lite (MOBIDB_LITE); mobidb-lite (MOBIDB_LITE)	no GO terms	no GO terms
EVSurface		DN10436_c1_g1_i4_8544	82	56339	3.66667	9	2	8	2	0.12		RhoGAP domain containing protein	TRUE	[INTERPRO, BLASTED, MAPPED]	379	11	4.46112e-50	60.26	3	P:GO:0007165; P:GO:0043547; F:GO:0005096	P:signal transduction; P:positive regulation of GTPase activity; F:GTPase activator activity			Coil (COILS); IPR008936 (G3DSA:1.10.555.GENE3D); IPR000198 (PFAM); mobidb-lite (MOBIDB_LITE); mobidb-lite (MOBIDB_LITE); mobidb-lite (MOBIDB_LITE); mobidb-lite (MOBIDB_LITE); mobidb-lite (MOBIDB_LITE); mobidb-lite (MOBIDB_LITE); PTHR45808 (PANTHER); IPR000198 (PROSITE_PROFILES); cd00159 (CDD); IPR008936 (SUPERFAMILY)	P:GO:0007165	P:signal transduction
EVSurface		DN11320_c0_g1_i15_13678	125	33213	3.66667	5	3	5	3	0.33		No hit	TRUE	[INTERPRO, NO-BLAST]	113									mobidb-lite (MOBIDB_LITE); mobidb-lite (MOBIDB_LITE)	no GO terms	no GO terms
EVSurface		DN12405_c2_g4_i1_45489	55	27409	3.66667	5	1	5	1	0.12		Uncharacterised
EVSurface		DN13419_c0_g1_i1_31173	79	33593	3.66667	7	1	7	1	0.1		proteasome (prosome macropain) subunit beta type 4	TRUE	[INTERPRO, BLASTED, MAPPED, ANNOTATED]	264	20	4.00263e-158	80.09	6	P:GO:0051603; F:GO:0004298; C:GO:0005634; C:GO:0005737; C:GO:0005839; C:GO:0016020	P:proteolysis involved in cellular protein catabolic process; F:threonine-type endopeptidase activity; C:nucleus; C:cytoplasm; C:proteasome core complex; C:membrane	EC:3.4.99; EC:3.4.25	Acting on peptide bonds (peptidases); Acting on peptide bonds (peptidases)	IPR016295 (PIRSF); IPR001353 (PFAM); IPR029055 (G3DSA:3.60.20.GENE3D); PTHR11599 (PANTHER); IPR016295 (PTHR11599:PANTHER); IPR016050 (PROSITE_PATTERNS); IPR023333 (PROSITE_PROFILES); IPR016295 (CDD); IPR029055 (SUPERFAMILY)	P:GO:0051603; F:GO:0004298; C:GO:0005839	P:proteolysis involved in cellular protein catabolic process; F:threonine-type endopeptidase activity; C:proteasome core complex
EVSurface		DN4464_c0_g1_i1_47764	93	49110	3.66667	5	1	5	1	0.07		growth factor receptor bound protein 2	TRUE	[INTERPRO, BLASTED]	250	20	2.01539e-179	82.66						IPR000980 (PRINTS); PR00499 (PRINTS); IPR001452 (PRINTS); IPR000980 (PFAM); IPR036860 (G3DSA:3.30.505.GENE3D); G3DSA:2.30.30.40 (GENE3D); IPR001452 (PFAM); G3DSA:2.30.30.40 (GENE3D); IPR030219 (PTHR19969:PANTHER); PTHR19969 (PANTHER); IPR000980 (PROSITE_PROFILES); IPR001452 (PROSITE_PROFILES); IPR001452 (PROSITE_PROFILES); cd00174 (CDD); cd09941 (CDD); cd11804 (CDD); IPR036860 (SUPERFAMILY); IPR0…	F:GO:0005515	F:protein binding
EVSurface		DN4508_c0_g1_i1_29941	84	29382	3.66667	5	2	5	2	0.24		putative arp2/3 complex 21 kD subunit	TRUE	[INTERPRO, BLASTED, MAPPED, ANNOTATED]	195	20	1.21464e-117	86.53	4	P:GO:0034314; F:GO:0003779; C:GO:0005737; C:GO:0005885	P:Arp2/3 complex-mediated actin nucleation; F:actin binding; C:cytoplasm; C:Arp2/3 protein complex			IPR007204 (PFAM); IPR007204 (PIRSF); IPR036753 (G3DSA:1.10.1760.GENE3D); IPR007204 (PANTHER); IPR036753 (SUPERFAMILY)	P:GO:0030833; P:GO:0034314; C:GO:0005856; C:GO:0005885	P:regulation of actin filament polymerization; P:Arp2/3 complex-mediated actin nucleation; C:cytoskeleton; C:Arp2/3 protein complex
EVSurface		DN10049_c0_g1_i2_15487	170	27070	3.33333	5	3	3	1	0.12		Cytoplasmic and mitochondrial histidine tRNA synthetase	TRUE	[INTERPRO, BLASTED, MAPPED]	168	7	4.52975e-06	78.22	11	P:GO:0006427; P:GO:0055085; F:GO:0000166; F:GO:0004812; F:GO:0004821; F:GO:0005524; F:GO:0016887; F:GO:0017112; F:GO:0042626; C:GO:0016020; C:GO:0016021	P:histidyl-tRNA aminoacylation; P:transmembrane transport; F:nucleotide binding; F:aminoacyl-tRNA ligase activity; F:histidine-tRNA ligase activity; F:ATP binding; F:ATPase activity; F:Rab guanyl-nucleotide exchange factor activity; F:ATPase-coupled transmembrane transporter activity; C:membrane; C:integral component of membrane			mobidb-lite (MOBIDB_LITE); mobidb-lite (MOBIDB_LITE)	no GO terms	no GO terms
EVSurface		DN11875_c2_g1_i6_56172	248	44690	3.33333	7	4	4	2	0.24		solute carrier family 5	TRUE	[INTERPRO, BLASTED, MAPPED, ANNOTATED]	397	20	0	78.79	3	P:GO:0055085; F:GO:0022857; C:GO:0016021	P:transmembrane transport; F:transmembrane transporter activity; C:integral component of membrane			IPR001734 (TIGRFAM); IPR001734 (PFAM); IPR038377 (G3DSA:1.20.1730.GENE3D); PTHR11819 (PANTHER); IPR018212 (PROSITE_PATTERNS); IPR001734 (PROSITE_PROFILES)	P:GO:0055085; F:GO:0022857; C:GO:0016020	P:transmembrane transport; F:transmembrane transporter activity; C:membrane
EVSurface		DN7013_c0_g1_i1_44899	77	22842	3.33333	2	2	1	1	0.15	1	universal stress protein	TRUE	[INTERPRO, BLASTED]	167	20	2.95412e-61	58.37						IPR006015 (PRINTS); IPR006016 (PFAM); IPR014729 (G3DSA:3.40.50.GENE3D); PTHR46989 (PANTHER); cd00293 (CDD); SSF52402 (SUPERFAMILY)	no GO terms	no GO terms
EVSurface		DN7305_c0_g1_i1_44488	125	34051	3.33333	5	4	3	3	0.45	5	Vacuolar protein sorting-associated protein VTA1	TRUE	[INTERPRO, BLASTED]	256	20	2.32003e-121	62.85						IPR023175 (G3DSA:1.25.40.GENE3D); G3DSA:1.20.5.420 (GENE3D); IPR041212 (PFAM); IPR039431 (PFAM); mobidb-lite (MOBIDB_LITE); mobidb-lite (MOBIDB_LITE); PTHR46009 (PANTHER)	no GO terms	no GO terms
EVSurface		DN7664_c0_g1_i2_21096	81	34054	3.33333	6	1	6	1	0.1		multivesicular body subunit 12b	TRUE	[INTERPRO, BLASTED, MAPPED, ANNOTATED]	151	20	2.54618e-71	71.96	6	P:GO:0015867; P:GO:0055085; F:GO:0005347; F:GO:0005509; C:GO:0000813; C:GO:0016021	P:ATP transport; P:transmembrane transport; F:ATP transmembrane transporter activity; F:calcium ion binding; C:ESCRT I complex; C:integral component of membrane			IPR018798 (PFAM); G3DSA:2.100.10.50 (GENE3D); IPR040297 (PANTHER); IPR023341 (PROSITE_PROFILES)	C:GO:0000813	C:ESCRT I complex
EVSurface		DN9792_c0_g1_i5_7587	175	23402	3.33333	5	3	3	1	0.14		Cytoplasmic and mitochondrial histidine tRNA synthetase	TRUE	[INTERPRO, BLASTED, MAPPED]	168	6	4.44405e-06	83.05	10	P:GO:0006427; P:GO:0055085; F:GO:0000166; F:GO:0004812; F:GO:0004821; F:GO:0005524; F:GO:0016887; F:GO:0042626; C:GO:0016020; C:GO:0016021	P:histidyl-tRNA aminoacylation; P:transmembrane transport; F:nucleotide binding; F:aminoacyl-tRNA ligase activity; F:histidine-tRNA ligase activity; F:ATP binding; F:ATPase activity; F:ATPase-coupled transmembrane transporter activity; C:membrane; C:integral component of membrane			mobidb-lite (MOBIDB_LITE); mobidb-lite (MOBIDB_LITE)	no GO terms	no GO terms
EVSurface		DN10436_c0_g1_i1_34321	51	29960	3	6	2	6	2	0.23		Rho GDP-dissociation inhibitor	TRUE	[INTERPRO, BLASTED, MAPPED, ANNOTATED]	190	20	6.52866e-111	74.71	3	P:GO:0050790; F:GO:0005094; C:GO:0005737	P:regulation of catalytic activity; F:Rho GDP-dissociation inhibitor activity; C:cytoplasm			IPR000406 (PFAM); IPR024792 (G3DSA:2.70.50.GENE3D); IPR000406 (PANTHER); PTHR10980:SF3 (PANTHER); IPR014756 (SUPERFAMILY)	F:GO:0005094; C:GO:0005737	F:Rho GDP-dissociation inhibitor activity; C:cytoplasm
EVSurface		DN11430_c0_g1_i3_70176	79	27742	3	3	2	3	2	0.25		expressed conserved protein	TRUE	[INTERPRO, BLASTED]	115	20	2.14148e-19	61.11						mobidb-lite (MOBIDB_LITE); mobidb-lite (MOBIDB_LITE)	no GO terms	no GO terms
EVSurface		DN11731_c1_g2_i2_61007	142	14060	3	3	1	2	1	0.24		Uncharacterised
EVSurface		DN11780_c0_g1_i1_60951	85	49901	3	5	3	4	3	0.21		expressed conserved protein	TRUE	[INTERPRO, BLASTED]	363	12	3.45817e-28	49.99						Coil (COILS); IPR043792 (PFAM); mobidb-lite (MOBIDB_LITE); mobidb-lite (MOBIDB_LITE); mobidb-lite (MOBIDB_LITE); mobidb-lite (MOBIDB_LITE); mobidb-lite (MOBIDB_LITE); mobidb-lite (MOBIDB_LITE)	no GO terms	no GO terms
EVSurface		DN11957_c6_g1_i5_58241	72	22148	3	5	1	3	1	0.15		No hit	TRUE	[INTERPRO, NO-BLAST]	133									mobidb-lite (MOBIDB_LITE); mobidb-lite (MOBIDB_LITE); mobidb-lite (MOBIDB_LITE)	no GO terms	no GO terms
EVSurface		DN12108_c1_g16_i1_41621	88	30115	3	4	1	4	1	0.11		Charged multivesicular body protein 6	TRUE	[INTERPRO, BLASTED, MAPPED, ANNOTATED]	212	20	5.07262e-94	76.33	6	P:GO:0007034; P:GO:0032509; F:GO:0032266; F:GO:0043130; C:GO:0000814; C:GO:0016021	P:vacuolar transport; P:endosome transport via multivesicular body sorting pathway; F:phosphatidylinositol-3-phosphate binding; F:ubiquitin binding; C:ESCRT II complex; C:integral component of membrane			Coil (COILS); IPR005024 (PFAM); mobidb-lite (MOBIDB_LITE); mobidb-lite (MOBIDB_LITE); PTHR22761:SF5 (PANTHER); PTHR22761 (PANTHER)	P:GO:0007034	P:vacuolar transport
EVSurface		DN4177_c0_g1_i1_1775	104	24133	3	6	3	5	2	0.48	2	immunogenic protein ts11	TRUE	[INTERPRO, BLASTED, MAPPED]	151	17	6.95171e-34	61.87	2	P:GO:0010951; F:GO:0004869	P:negative regulation of endopeptidase activity; F:cysteine-type endopeptidase inhibitor activity			G3DSA:3.10.450.10 (GENE3D); SSF54403 (SUPERFAMILY)	no GO terms	no GO terms
EVSurface		DN4632_c0_g1_i1_63339	111	36455	3	5	2	5	2	0.19		vesicle-associated membrane protein 7-like	TRUE	[INTERPRO, BLASTED, MAPPED, ANNOTATED]	228	20	9.62461e-104	67.43	2	P:GO:0016192; C:GO:0016021	P:vesicle-mediated transport; C:integral component of membrane			IPR001388 (PRINTS); G3DSA:1.20.5.110 (GENE3D); IPR001388 (PFAM); G3DSA:3.30.450.50 (GENE3D); PTHR21136 (PANTHER); PTHR21136:SF168 (PANTHER); IPR042855 (PROSITE_PROFILES); IPR010908 (CDD); SSF58038 (SUPERFAMILY); IPR011012 (SUPERFAMILY)	P:GO:0016192; C:GO:0016021	P:vesicle-mediated transport; C:integral component of membrane
EVSurface		DN6700_c0_g1_i1_24721	113	21909	3	6	1	6	1	0.15		dynein light chain 2, cytoplasmic	TRUE	[INTERPRO, BLASTED, MAPPED, ANNOTATED]	99	20	4.92795e-47	77.68	5	P:GO:0007017; F:GO:0003774; C:GO:0005737; C:GO:0005874; C:GO:0030286	P:microtubule-based process; F:motor activity; C:cytoplasm; C:microtubule; C:dynein complex	EC:3.6.1.15	Nucleoside-triphosphate phosphatase	IPR001372 (PFAM); IPR037177 (G3DSA:3.30.740.GENE3D); mobidb-lite (MOBIDB_LITE); mobidb-lite (MOBIDB_LITE); IPR001372 (PANTHER); PTHR11886:SF35 (PANTHER); IPR037177 (SUPERFAMILY)	P:GO:0007017; C:GO:0030286	P:microtubule-based process; C:dynein complex
EVSurface		DN6970_c0_g1_i1_68305	97	35110	3	4	4	4	4	0.44	3	charged multivesicular body protein 1a-like	TRUE	[INTERPRO, BLASTED, MAPPED, ANNOTATED]	207	20	2.98999e-123	81.92	3	P:GO:0007034; C:GO:0043227; C:GO:0043229	P:vacuolar transport; C:membrane-bounded organelle; C:intracellular organelle			Coil (COILS); IPR005024 (PFAM); IPR042277 (G3DSA:1.20.1260.GENE3D); PTHR10476 (PANTHER); PTHR10476:SF2 (PANTHER)	P:GO:0007034	P:vacuolar transport
EVSurface		DN7526_c0_g1_i1_24429	94	12852	3	6	2	6	2	0.6		Uncharacterised
EVSurface		DN8726_c0_g1_i1_26219	102	42005	3	5	2	4	2	0.16		Annexin A7	TRUE	[INTERPRO, BLASTED, MAPPED, ANNOTATED]	310	20	1.25087e-144	73.8	2	F:GO:0005509; F:GO:0005544	F:calcium ion binding; F:calcium-dependent phospholipid binding			IPR001464 (PRINTS); IPR037104 (G3DSA:1.10.220.GENE3D); IPR037104 (G3DSA:1.10.220.GENE3D); IPR018502 (PFAM); IPR037104 (G3DSA:1.10.220.GENE3D); IPR037104 (G3DSA:1.10.220.GENE3D); PTHR10502:SF226 (PANTHER); PTHR10502 (PANTHER); IPR018252 (PROSITE_PATTERNS); IPR018502 (PROSITE_PROFILES); IPR018502 (PROSITE_PROFILES); IPR018502 (PROSITE_PROFILES); IPR018502 (PROSITE_PROFILES); IPR037104 (SUPERFAMILY)	F:GO:0005509; F:GO:0005544	F:calcium ion binding; F:calcium-dependent phospholipid binding
EVSurface		DN10660_c0_g1_i2_45795	97	73079	2.66667	4	1	4	1	0.04		Glucose-6-phosphate isomerase	TRUE	[INTERPRO, BLASTED, MAPPED, ANNOTATED]	558	20	0	87.65	4	P:GO:0006094; P:GO:0006096; F:GO:0004347; C:GO:0016021	P:gluconeogenesis; P:glycolytic process; F:glucose-6-phosphate isomerase activity; C:integral component of membrane	EC:5.3.1.9	Glucose-6-phosphate isomerase	IPR001672 (PRINTS); IPR023096 (G3DSA:1.10.1390.GENE3D); G3DSA:3.40.50.10490 (GENE3D); IPR001672 (PFAM); G3DSA:3.40.50.10490 (GENE3D); PTHR11469:SF5 (PANTHER); IPR001672 (PANTHER); IPR018189 (PROSITE_PATTERNS); IPR018189 (PROSITE_PATTERNS); IPR001672 (HAMAP); IPR001672 (PROSITE_PROFILES); IPR035476 (CDD); IPR035482 (CDD); SSF53697 (SUPERFAMILY)	P:GO:0006094; P:GO:0006096; F:GO:0004347	P:gluconeogenesis; P:glycolytic process; F:glucose-6-phosphate isomerase activity
EVSurface		DN10754_c1_g2_i5_35855	53	22157	2.66667	3	1	2	1	0.15	6	aldo keto reductase family 1 member B4	TRUE	[INTERPRO, BLASTED, MAPPED, ANNOTATED]	116	20	1.13761e-37	72.26	1	C:GO:0016020	C:membrane			IPR023210 (PFAM); IPR036812 (G3DSA:3.20.20.GENE3D); PTHR43827:SF3 (PANTHER); IPR020471 (PANTHER); IPR036812 (SUPERFAMILY)	P:GO:0055114; F:GO:0016491	P:oxidation-reduction process; F:oxidoreductase activity
EVSurface		DN12724_c0_g1_i3_70841	127	38926	2.66667	4	2	3	1	0.08		S-formylglutathione hydrolase	TRUE	[INTERPRO, BLASTED, MAPPED, ANNOTATED]	288	20	4.4483e-173	80.64	4	P:GO:0046294; F:GO:0018738; F:GO:0052689; C:GO:0005737	P:formaldehyde catabolic process; F:S-formylglutathione hydrolase activity; F:carboxylic ester hydrolase activity; C:cytoplasm	EC:3.1.2.12; EC:3.1.1.1	S-formylglutathione hydrolase; Carboxylesterase	IPR029058 (G3DSA:3.40.50.GENE3D); IPR014186 (TIGRFAM); IPR000801 (PFAM); IPR014186 (PANTHER); PTHR10061:SF1 (PANTHER); IPR029058 (SUPERFAMILY)	P:GO:0046294; F:GO:0018738	P:formaldehyde catabolic process; F:S-formylglutathione hydrolase activity
EVSurface		DN42_c0_g1_i1_21400	94	26716	2.66667	4	1	4	1	0.12		dynein light chain	TRUE	[INTERPRO, BLASTED, MAPPED, ANNOTATED]	106	20	3.78999e-47	72.49	5	P:GO:0007017; F:GO:0003774; C:GO:0005737; C:GO:0005874; C:GO:0030286	P:microtubule-based process; F:motor activity; C:cytoplasm; C:microtubule; C:dynein complex	EC:3.6.1.15	Nucleoside-triphosphate phosphatase	IPR001372 (PFAM); IPR037177 (G3DSA:3.30.740.GENE3D); PTHR11886:SF35 (PANTHER); IPR001372 (PANTHER); IPR037177 (SUPERFAMILY)	P:GO:0007017; C:GO:0030286	P:microtubule-based process; C:dynein complex
EVSurface		DN6272_c0_g1_i1_51478	109	24520	2.66667	3	1	3	1	0.14		universal stress protein	TRUE	[INTERPRO, BLASTED]	177	20	3.3709e-55	65.92						IPR006015 (PRINTS); IPR006016 (PFAM); IPR014729 (G3DSA:3.40.50.GENE3D); PTHR46989 (PANTHER); cd00293 (CDD); SSF52402 (SUPERFAMILY)	no GO terms	no GO terms
EVSurface		DN9016_c0_g1_i1_35594	98	12031	2.66667	4	2	4	2	0.66		Uncharacterised
EVSurface		DN10223_c0_g1_i2_1272	87	13049	2.33333	5	1	4	1	0.26		No hit	TRUE	[INTERPRO, NO-BLAST]	136									mobidb-lite (MOBIDB_LITE); mobidb-lite (MOBIDB_LITE); mobidb-lite (MOBIDB_LITE); mobidb-lite (MOBIDB_LITE); mobidb-lite (MOBIDB_LITE)	no GO terms	no GO terms
EVSurface	Immunomodulators	DN10391_c0_g1_i14_3757	72	37944	2.33333	4	1	4	1	0.09		Leukocyte surface antigen CD53	TRUE	[INTERPRO, BLASTED, MAPPED, ANNOTATED]	226	20	7.37773e-77	70.83	1	C:GO:0016020	C:membrane			IPR000301 (PRINTS); IPR000301 (PIRSF); IPR008952 (G3DSA:1.10.1450.GENE3D); IPR018499 (PFAM); PTHR19282:SF39 (PANTHER); PTHR19282 (PANTHER); cd03127 (CDD); IPR008952 (SUPERFAMILY)	C:GO:0016021	C:integral component of membrane
EVSurface		DN10572_c0_g2_i1_42366	64	27942	2.33333	4	3	3	3	0.4	1	actin related protein 2:3 complex	TRUE	[INTERPRO, BLASTED, MAPPED, ANNOTATED]	167	20	1.1938e-114	96.98	5	P:GO:0034314; F:GO:0003779; C:GO:0005737; C:GO:0005885; C:GO:0016021	P:Arp2/3 complex-mediated actin nucleation; F:actin binding; C:cytoplasm; C:Arp2/3 protein complex; C:integral component of membrane			IPR034666 (G3DSA:3.30.1460.GENE3D); IPR008384 (PIRSF); IPR008384 (PFAM); IPR008384 (PANTHER); PTHR22629:SF1 (PANTHER); cd18521 (CDD); IPR034666 (SUPERFAMILY)	P:GO:0030041; P:GO:0030833; P:GO:0034314; C:GO:0005885; C:GO:0015629	P:actin filament polymerization; P:regulation of actin filament polymerization; P:Arp2/3 complex-mediated actin nucleation; C:Arp2/3 protein complex; C:actin cytoskeleton
EVSurface		DN11098_c0_g2_i1_52906	87	14960	2.33333	4	2	3	1	0.51	3	lung cancer oncogene 5	TRUE	[INTERPRO, BLASTED, MAPPED, ANNOTATED]	129	12	1.33796e-15	63.18	1	C:GO:0005856	C:cytoskeleton			PTHR11886:SF93 (PANTHER); IPR001372 (PANTHER)	P:GO:0007017; C:GO:0030286	P:microtubule-based process; C:dynein complex
EVSurface		DN12728_c0_g1_i1_57165	62	42228	2.33333	4	1	4	1	0.08		expressed conserved protein	TRUE	[INTERPRO, BLASTED]	320	9	3.2889e-71	57.15						mobidb-lite (MOBIDB_LITE); mobidb-lite (MOBIDB_LITE); mobidb-lite (MOBIDB_LITE); mobidb-lite (MOBIDB_LITE); mobidb-lite (MOBIDB_LITE); mobidb-lite (MOBIDB_LITE)	no GO terms	no GO terms
EVSurface		DN4232_c0_g1_i1_69936	76	22527	2.33333	2	2	2	2	0.32	3	actin depolymerizing factor	TRUE	[INTERPRO, BLASTED, MAPPED, ANNOTATED]	137	20	5.525e-61	75.27	8	P:GO:0006412; P:GO:0030042; F:GO:0003723; F:GO:0003735; F:GO:0003779; C:GO:0005634; C:GO:0005840; C:GO:0015629	P:translation; P:actin filament depolymerization; F:RNA binding; F:structural constituent of ribosome; F:actin binding; C:nucleus; C:ribosome; C:actin cytoskeleton			IPR017904 (PRINTS); IPR029006 (G3DSA:3.40.20.GENE3D); IPR002108 (PFAM); IPR017904 (PANTHER); PTHR11913:SF12 (PANTHER); IPR002108 (PROSITE_PROFILES); IPR017904 (CDD); SSF55753 (SUPERFAMILY)	P:GO:0030042; F:GO:0003779; C:GO:0015629	P:actin filament depolymerization; F:actin binding; C:actin cytoskeleton
EVSurface		DN5076_c0_g1_i1_13067	63	11129	2.33333	3	1	3	1	0.31		Uncharacterised
EVSurface		DN6787_c0_g1_i1_11496	139	39353	2.33333	3	2	3	2	0.17		sj ts4 protein	TRUE	[INTERPRO, BLASTED]	288	20	2.54706e-142	74.42						mobidb-lite (MOBIDB_LITE); PTHR14024 (PANTHER); PTHR14024 (PANTHER); PTHR14024:SF49 (PANTHER); PTHR14024:SF49 (PANTHER)	no GO terms	no GO terms
EVSurface		DN7284_c0_g1_i1_73690	69	30720	2.33333	2	1	2	1	0.11		expressed conserved protein	TRUE	[INTERPRO, BLASTED, MAPPED]	159	16	4.947e-45	52.98	3	P:GO:0046907; C:GO:0016020; C:GO:0016021	P:intracellular transport; C:membrane; C:integral component of membrane			IPR009635 (PFAM); mobidb-lite (MOBIDB_LITE); mobidb-lite (MOBIDB_LITE); mobidb-lite (MOBIDB_LITE)	C:GO:0016021	C:integral component of membrane
EVSurface		DN7686_c0_g1_i1_8310	103	39688	2.33333	5	2	5	2	0.17		Uncharacterised
EVSurface		DN8067_c0_g1_i1_17960	161	19379	2.33333	5	2	2	2	0.38	5	unnamed protein product	TRUE	[INTERPRO, BLASTED, MAPPED]	121	3	9.57721e-16	69.81	1	C:GO:0005737	C:cytoplasm			Coil (COILS); IPR027267 (G3DSA:1.20.1270.GENE3D); mobidb-lite (MOBIDB_LITE); mobidb-lite (MOBIDB_LITE); IPR027267 (SUPERFAMILY)	no GO terms	no GO terms
EVSurface		DN924_c0_g1_i1_26022	118	23458	2.33333	4	2	3	1	0.14		Uncharacterised
EVSurface		DN9428_c0_g1_i7_5450	113	12728	2.33333	2	1	2	1	0.27	4	Uncharacterised
EVSurface		DN9799_c0_g1_i1_46050	148	18919	2.33333	5	3	3	1	0.39	4	Dynein light chain 1, cytoplasmic	TRUE	[INTERPRO, BLASTED, MAPPED, ANNOTATED]	100	20	6.4256e-52	73.03	5	P:GO:0007017; F:GO:0003774; C:GO:0005737; C:GO:0005874; C:GO:0030286	P:microtubule-based process; F:motor activity; C:cytoplasm; C:microtubule; C:dynein complex	EC:3.6.1.15	Nucleoside-triphosphate phosphatase	IPR001372 (PFAM); IPR037177 (G3DSA:3.30.740.GENE3D); mobidb-lite (MOBIDB_LITE); mobidb-lite (MOBIDB_LITE); IPR037177 (SUPERFAMILY)	P:GO:0007017; C:GO:0030286	P:microtubule-based process; C:dynein complex
EVSurface		DN1069_c0_g1_i1_49574	99	21970	2	2	1	2	1	0.15	5	Xaa-Pro dipeptidase	TRUE	[INTERPRO, BLASTED, MAPPED]	109	8	7.44906e-33	66.78	1	F:GO:0046872	F:metal ion binding			no IPS match	no IPS match	no IPS match
EVSurface		DN10713_c0_g1_i15_10204	73	39236	2	5	2	5	2	0.18		Uncharacterised
EVSurface		DN10929_c0_g1_i1_65099	64	48409	2	3	1	3	1	0.07	2	Ras-related protein Rap-1b	TRUE	[INTERPRO, BLASTED, MAPPED, ANNOTATED]	183	20	3.30708e-132	94.19	7	P:GO:0032486; F:GO:0003924; F:GO:0005525; C:GO:0005829; C:GO:0005886; C:GO:0030054; C:GO:0070062	P:Rap protein signal transduction; F:GTPase activity; F:GTP binding; C:cytosol; C:plasma membrane; C:cell junction; C:extracellular exosome	EC:3.6.1.15	Nucleoside-triphosphate phosphatase	PR00449 (PRINTS); G3DSA:3.40.50.300 (GENE3D); IPR001806 (PFAM); IPR005225 (TIGRFAM); IPR020849 (PANTHER); PTHR24070:SF424 (PANTHER); IPR020849 (PROSITE_PROFILES); IPR038851 (CDD); IPR027417 (SUPERFAMILY)	P:GO:0007165; P:GO:0032486; F:GO:0003924; F:GO:0005525; C:GO:0016020	P:signal transduction; P:Rap protein signal transduction; F:GTPase activity; F:GTP binding; C:membrane
EVSurface		DN12615_c0_g1_i3_72374	301	10043	2	5	5	3	3	3.44	4	No hit	TRUE	[INTERPRO, NO-BLAST]	101									mobidb-lite (MOBIDB_LITE); mobidb-lite (MOBIDB_LITE); mobidb-lite (MOBIDB_LITE)	no GO terms	no GO terms
EVSurface		DN3799_c0_g1_i1_26360	82	28368	2	2	1	2	1	0.12	2	Uncharacterised
EVSurface		DN6144_c0_g1_i1_49576	64	24009	2	2	2	2	2	0.3	3	Dynein light chain type 1 2	TRUE	[INTERPRO, BLASTED, MAPPED, ANNOTATED]	101	20	1.49106e-53	69.75	5	P:GO:0007017; F:GO:0003774; C:GO:0005737; C:GO:0005874; C:GO:0030286	P:microtubule-based process; F:motor activity; C:cytoplasm; C:microtubule; C:dynein complex	EC:3.6.1.15	Nucleoside-triphosphate phosphatase	IPR037177 (G3DSA:3.30.740.GENE3D); IPR001372 (PFAM); IPR037177 (SUPERFAMILY)	P:GO:0007017; C:GO:0030286	P:microtubule-based process; C:dynein complex
EVSurface		DN10282_c0_g1_i1_1399	70	28308	1.66667	4	3	2	1	0.4		No hit	TRUE	[INTERPRO, NO-BLAST]	187									mobidb-lite (MOBIDB_LITE); mobidb-lite (MOBIDB_LITE)	no GO terms	no GO terms
EVSurface	Immunomodulators	DN10619_c0_g1_i2_33101	111	37336	1.66667	3	2	2	1	0.19		Leukocyte surface antigen CD53	TRUE	[INTERPRO, BLASTED, MAPPED, ANNOTATED]	223	20	1.40726e-71	70.46	1	C:GO:0016020	C:membrane			IPR000301 (PRINTS); IPR018499 (PFAM); IPR008952 (G3DSA:1.10.1450.GENE3D); IPR000301 (PIRSF); PTHR19282 (PANTHER); PTHR19282:SF39 (PANTHER); cd03127 (CDD); IPR008952 (SUPERFAMILY)	C:GO:0016021	C:integral component of membrane
EVSurface		DN10794_c0_g1_i6_9782	142	34305	1.66667	3	2	2	1	0.2		Uncharacterised
EVSurface		DN11937_c1_g1_i1_46230	269	9723	1.66667	4	4	2	2	1.49	1	Uncharacterised
EVSurface		DN12741_c0_g3_i1_70786	113	13506	1.66667	3	1	3	1	0.25		Uncharacterised
EVSurface		DN12970_c0_g1_i1_55520	65	18699	1.66667	3	1	3	1	0.18		Uncharacterised
EVSurface		DN4529_c0_g1_i1_67761	108	23671	1.66667	2	1	2	1	0.14		translationally controlled tumor protein	TRUE	[INTERPRO, BLASTED, MAPPED, ANNOTATED]	172	20	1.3351e-88	71.56	1	C:GO:0005737	C:cytoplasm			IPR018105 (PRINTS); IPR011323 (G3DSA:2.170.150.GENE3D); IPR018105 (PFAM); IPR018105 (PANTHER); IPR034737 (PROSITE_PROFILES); IPR011057 (SUPERFAMILY)	no GO terms	no GO terms
EVSurface		DN10542_c0_g1_i12_3391	72	19734	1.33333	2	2	2	2	0.37	6	unnamed protein product, partial	TRUE	[INTERPRO, BLASTED]	181	1	0.000264574	51.25						no IPS match	no IPS match	no IPS match
EVSurface		DN10763_c1_g5_i1_22341	123	10508	1.33333	2	2	1	1	0.76	4	Uncharacterised
EVSurface		DN10979_c0_g6_i1_14501	61	29852	1.33333	2	1	2	1	0.11	4	hypothetical transcript	TRUE	[INTERPRO, BLASTED, MAPPED]	270	12	1.29172e-44	50.59	1	P:GO:0045104	P:intermediate filament cytoskeleton organization			mobidb-lite (MOBIDB_LITE)	no GO terms	no GO terms
EVSurface	Immunomodulators	DN12623_c0_g3_i3_72304	76	16238	1.33333	2	1	2	1	0.21		glutathione S transferase	TRUE	[INTERPRO, BLASTED, MAPPED, ANNOTATED]	137	20	6.43245e-49	69.86	1	F:GO:0016740	F:transferase activity			IPR036249 (G3DSA:3.40.30.GENE3D); IPR004045 (PFAM); G3DSA:1.20.1050.10 (GENE3D),SFLDS00019 (SFLD); IPR040079 (PANTHER); PTHR11571:SF240 (PANTHER); IPR004045 (PROSITE_PROFILES); IPR010987 (PROSITE_PROFILES); IPR036282 (SUPERFAMILY); IPR036249 (SUPERFAMILY)	P:GO:0006749; F:GO:0005515	P:glutathione metabolic process; F:protein binding
EVSurface		DN5307_c0_g1_i1_10825	64	13252	1.33333	2	1	2	1	0.26		Uncharacterised
EVSurface		DN8639_c0_g1_i2_315	116	27870	1.33333	2	1	2	1	0.12		tyrosine protein kinase Src42A	TRUE	[INTERPRO, BLASTED, MAPPED, ANNOTATED]	178	20	1.22482e-64	57.91	2	P:GO:0044237; F:GO:0016301	P:cellular metabolic process; F:kinase activity			IPR001452 (PRINTS); IPR000980 (PFAM); G3DSA:2.30.30.40 (GENE3D); IPR036860 (G3DSA:3.30.505.GENE3D); IPR001452 (PFAM); IPR043539 (PANTHER); IPR001452 (PROSITE_PROFILES); IPR000980 (PROSITE_PROFILES); cd00173 (CDD); cd00174 (CDD); IPR036028 (SUPERFAMILY); IPR036860 (SUPERFAMILY)	F:GO:0005515	F:protein binding
EVSurface		DN10295_c0_g2_i1_1400	107	10906	1	1	1	1	1	0.32	5	collagen triple helix repeat containing protein	TRUE	[INTERPRO, BLASTED, MAPPED, ANNOTATED]	104	20	1.2082e-12	74.35	1	C:GO:0019012	C:virion			mobidb-lite (MOBIDB_LITE); mobidb-lite (MOBIDB_LITE); mobidb-lite (MOBIDB_LITE); mobidb-lite (MOBIDB_LITE)	no GO terms	no GO terms
EVSurface		DN11225_c0_g1_i3_23315	66	18905	1	2	1	2	1	0.18		hypothetical protein EgrG_000663300	TRUE	[INTERPRO, BLASTED, MAPPED]	145	1	0.000633187	45.56	2	C:GO:0016020; C:GO:0016021	C:membrane; C:integral component of membrane			no IPS match	no IPS match	no IPS match
EVSurface		DN11384_c0_g1_i4_13548	78	10029	1	2	2	1	1	0.82	5	Uncharacterised
EVSurface		DN1221_c0_g1_i1_76151	72	21489	1	2	1	2	1	0.16	1	putative synaptobrevin	TRUE	[INTERPRO, BLASTED, MAPPED, ANNOTATED]	110	20	2.54181e-56	85.52	2	P:GO:0016192; C:GO:0016021	P:vesicle-mediated transport; C:integral component of membrane			IPR001388 (PRINTS); IPR016444 (PIRSF); IPR001388 (PFAM); G3DSA:1.20.5.110 (GENE3D); IPR016444 (PANTHER); IPR042855 (PROSITE_PROFILES); SSF58038 (SUPERFAMILY)	P:GO:0016192; C:GO:0016021	P:vesicle-mediated transport; C:integral component of membrane
EVSurface		DN11009_c0_g2_i4_16581	85	15918	0.666667	1	1	1	1	0.21	5	No hit	TRUE	[INTERPRO, NO-BLAST]	162									mobidb-lite (MOBIDB_LITE); mobidb-lite (MOBIDB_LITE); mobidb-lite (MOBIDB_LITE); mobidb-lite (MOBIDB_LITE); mobidb-lite (MOBIDB_LITE)	no GO terms	no GO terms
EVSurface		DN3633_c0_g2_i1_27257	57	7951	0.666667	1	1	1	1	0.44	5	Uncharacterised
EVSurface		DN5490_c0_g1_i1_26382	79	12457	0.666667	1	1	1	1	0.28	4	Uncharacterised
EVSurface		DN5660_c0_g1_i1_60037	71	15244	0.666667	1	1	1	1	0.22	1	expressed conserved protein	TRUE	[INTERPRO, BLASTED, MAPPED, ANNOTATED]	130	20	9.54674e-53	68.44	1	P:GO:0045104	P:intermediate filament cytoskeleton organization			Coil (COILS); mobidb-lite (MOBIDB_LITE)	no GO terms	no GO terms

## Sheet: Table S4. EV depleted ESP
Supplementary Table S4. The full list of proteins identified in A. perfoliata extracellular vesicles (EVs) depleted excretory-secretory products( ESP) proteomic dataset (Protein hits shaded in grey and in bold represent known helminth released immune modulators, as also identified in the A. perfoliata transcriptome).
Sample set	Immunomodulators	Accession	Score	Mass	Mean Number Reads	Num. of matches	Num. of significant matches	Num. of sequences	Num. of significant sequences	emPAI	Frame	Description	Column1	Tags	Length	#Hits	e-Value	sim mean	#GO	GO IDs	GO Names	Enzyme Codes	Enzyme Names	InterPro IDs	InterPro GO IDs	InterPro GO Names
EV depleted ESP		DN11838_c0_g1_i2_56054	6943	412370	292.333	353	219	169	104	2.15		WD repeat and FYVE domain-containing protein 3	TRUE	[INTERPRO, BLASTED, MAPPED, ANNOTATED]	665	20	0	72.52	1	F:GO:0046872	F:metal ion binding			IPR013083 (G3DSA:3.30.40.GENE3D); IPR036372 (G3DSA:1.10.1540.GENE3D); IPR001680 (PFAM); IPR000409 (PFAM); IPR000306 (PFAM); IPR015943 (G3DSA:2.130.10.GENE3D); PTHR46108 (PANTHER); IPR019775 (PROSITE_PATTERNS); IPR001680 (PROSITE_PROFILES); IPR000409 (PROSITE_PROFILES); IPR017986 (PROSITE_PROFILES); IPR017455 (PROSITE_PROFILES); IPR011011 (SUPERFAMILY); IPR036372 (SUPERFAMILY); IPR036322 (SUPERFAM…	F:GO:0005515; F:GO:0046872	F:protein binding; F:metal ion binding
EV depleted ESP		DN9818_c0_g2_i1_37822	2575	414851	168.667	192	107	144	87	1.22		Basement membrane-specific heparan sulfate proteoglycan core protein	TRUE	[INTERPRO, BLASTED, MAPPED, ANNOTATED]	3697	20	0	68.46	1	C:GO:0016021	C:integral component of membrane			IPR013783 (G3DSA:2.60.40.GENE3D); mobidb-lite (MOBIDB_LITE); mobidb-lite (MOBIDB_LITE); mobidb-lite (MOBIDB_LITE); mobidb-lite (MOBIDB_LITE); PTHR12231 (PANTHER); IPR007110 (PROSITE_PROFILES); IPR007110 (PROSITE_PROFILES); IPR007110 (PROSITE_PROFILES); IPR007110 (PROSITE_PROFILES); IPR007110 (PROSITE_PROFILES); IPR007110 (PROSITE_PROFILES); cd00096 (CDD); IPR036179 (SUPERFAMILY)	no GO terms	no GO terms
EV depleted ESP	Immunomodulators	DN14469_c0_g1_i1_24672	5177	56481	146	177	116	40	21	4.47		enolase	TRUE	[INTERPRO, BLASTED, MAPPED, ANNOTATED]	433	20	0	93.4	8	P:GO:0006096; P:GO:0006122; P:GO:0006367; F:GO:0000287; F:GO:0004634; F:GO:0016787; C:GO:0000015; C:GO:0005750	P:glycolytic process; P:mitochondrial electron transport, ubiquinol to cytochrome c; P:transcription initiation from RNA polymerase II promoter; F:magnesium ion binding; F:phosphopyruvate hydratase activity; F:hydrolase activity; C:phosphopyruvate hydratase complex; C:mitochondrial respiratory chain complex III	EC:4.2.1.11	Phosphopyruvate hydratase	IPR000941 (PRINTS); IPR000941 (TIGRFAM); IPR000941 (PIRSF); IPR029017 (G3DSA:3.30.390.GENE3D); IPR036849 (G3DSA:3.20.20.GENE3D); IPR020811 (PFAM); IPR020810 (PFAM); IPR000941 (PANTHER); IPR020809 (PROSITE_PATTERNS); IPR000941 (HAMAP); IPR000941 (CDD); IPR036849 (SUPERFAMILY); IPR029017 (SUPERFAMILY)	P:GO:0006096; F:GO:0000287; F:GO:0004634; C:GO:0000015	P:glycolytic process; F:magnesium ion binding; F:phosphopyruvate hydratase activity; C:phosphopyruvate hydratase complex
EV depleted ESP		DN12789_c0_g1_i5_70580	2655	220523	117.667	144	90	84	52	1.96		alpha 2 macroglobulin	TRUE	[INTERPRO, BLASTED, MAPPED, ANNOTATED]	1910	20	0	60.11	1	C:GO:0005576	C:extracellular region			G3DSA:2.20.130.20 (GENE3D); G3DSA:2.10.25.140 (GENE3D); IPR036595 (G3DSA:2.60.40.GENE3D); IPR011626 (PFAM); IPR041555 (PFAM); G3DSA:1.50.10.20 (GENE3D); G3DSA:2.60.40.1940 (GENE3D); IPR001599 (PFAM); G3DSA:2.60.120.1540 (GENE3D); IPR013783 (G3DSA:2.60.40.GENE3D); IPR001774 (PFAM); IPR009048 (PFAM); G3DSA:2.10.25.10 (GENE3D); mobidb-lite (MOBIDB_LITE); mobidb-lite (MOBIDB_LITE); PTHR11412 (PANTHER…	P:GO:0007154; F:GO:0004866; C:GO:0005576; C:GO:0005615; C:GO:0016020	P:cell communication; F:endopeptidase inhibitor activity; C:extracellular region; C:extracellular space; C:membrane
EV depleted ESP		DN9481_c0_g1_i1_55273	2044	50954	105.667	126	84	32	24	11.27		ornithine aminotransferase	TRUE	[INTERPRO, BLASTED, MAPPED, ANNOTATED]	431	20	0	88.89	4	F:GO:0004587; F:GO:0030170; F:GO:0050155; C:GO:0016021	F:ornithine-oxo-acid transaminase activity; F:pyridoxal phosphate binding; F:ornithine(lysine) transaminase activity; C:integral component of membrane	EC:2.6.1.13	Ornithine aminotransferase	IPR010164 (TIGRFAM); IPR015421 (G3DSA:3.40.640.GENE3D); IPR005814 (PFAM); IPR005814 (PIRSF); IPR015422 (G3DSA:3.90.1150.GENE3D); PTHR11986 (PANTHER); PTHR11986:SF118 (PANTHER); IPR005814 (PROSITE_PATTERNS); IPR005814 (CDD); IPR015424 (SUPERFAMILY)	F:GO:0003824; F:GO:0004587; F:GO:0008483; F:GO:0030170	F:catalytic activity; F:ornithine-oxo-acid transaminase activity; F:transaminase activity; F:pyridoxal phosphate binding
EV depleted ESP		DN10754_c1_g2_i7_35857	3057	41807	96.3333	97	78	22	16	6.22		aldo keto reductase family 1 member B4	TRUE	[INTERPRO, BLASTED, MAPPED]	324	20	9.39716e-144	74.07	2	P:GO:0055114; F:GO:0016491	P:oxidation-reduction process; F:oxidoreductase activity			IPR020471 (PRINTS); IPR023210 (PFAM); IPR020471 (PIRSF); IPR036812 (G3DSA:3.20.20.GENE3D); PTHR11732:SF165 (PANTHER); IPR020471 (PANTHER); IPR018170 (PROSITE_PATTERNS); IPR023210 (CDD); IPR036812 (SUPERFAMILY)	P:GO:0055114; F:GO:0016491	P:oxidation-reduction process; F:oxidoreductase activity
EV depleted ESP		DN10922_c1_g1_i5_14239	1993	46870	94.6667	131	71	36	27	21.9		Deoxyhypusine hydroxylase	TRUE	[INTERPRO, BLASTED, MAPPED, ANNOTATED]	386	20	6.89919e-143	67.85	4	P:GO:0008612; P:GO:0055114; F:GO:0019135; F:GO:0046872	P:peptidyl-lysine modification to peptidyl-hypusine; P:oxidation-reduction process; F:deoxyhypusine monooxygenase activity; F:metal ion binding	EC:1.14.99.29	Deoxyhypusine monooxygenase	IPR011989 (G3DSA:1.25.10.GENE3D); IPR004155 (PFAM); PTHR12697:SF34 (PANTHER); PTHR12697 (PANTHER); IPR016024 (SUPERFAMILY)	no GO terms	no GO terms
EV depleted ESP		DN9431_c0_g1_i1_5402	3042	65481	91	141	100	43	28	5.12		Protein disulfide-isomerase	TRUE	[INTERPRO, BLASTED, MAPPED, ANNOTATED]	484	20	0	77.76	5	P:GO:0006457; P:GO:0034976; P:GO:0045454; F:GO:0003756; C:GO:0005783	P:protein folding; P:response to endoplasmic reticulum stress; P:cell redox homeostasis; F:protein disulfide isomerase activity; C:endoplasmic reticulum	EC:5.3.4.1	Protein disulfide-isomerase	PR00421 (PRINTS); PF13848 (PFAM); IPR005788 (TIGRFAM); IPR005792 (TIGRFAM); IPR013766 (PFAM); IPR036249 (G3DSA:3.40.30.GENE3D); IPR036249 (G3DSA:3.40.30.GENE3D); IPR036249 (G3DSA:3.40.30.GENE3D); IPR036249 (G3DSA:3.40.30.GENE3D); PTHR18929 (PANTHER); PTHR18929:SF101 (PANTHER); IPR017937 (PROSITE_PATTERNS); IPR017937 (PROSITE_PATTERNS); IPR013766 (PROSITE_PROFILES); IPR013766 (PROSITE_PROFILES); c…	F:GO:0003756	F:protein disulfide isomerase activity
EV depleted ESP		DN10163_c0_g1_i1_35077	2110	164151	88.6667	100	66	57	37	2.46		peroxidasin	TRUE	[INTERPRO, BLASTED, MAPPED, ANNOTATED]	1347	20	0	77.54	5	P:GO:0006979; P:GO:0055114; P:GO:0098869; F:GO:0004601; F:GO:0020037	P:response to oxidative stress; P:oxidation-reduction process; P:cellular oxidant detoxification; F:peroxidase activity; F:heme binding	EC:1.11.1.7	Peroxidase	IPR019791 (PRINTS); IPR019791 (PFAM); IPR013783 (G3DSA:2.60.40.GENE3D); PF13927 (PFAM); IPR001611 (PFAM); IPR013783 (G3DSA:2.60.40.GENE3D); IPR037120 (G3DSA:1.10.640.GENE3D); IPR032675 (G3DSA:3.80.10.GENE3D); IPR013098 (PFAM); PTHR11475 (PANTHER); PTHR11475 (PANTHER); PTHR11475:SF58 (PANTHER); PTHR11475:SF58 (PANTHER); PTHR11475:SF58 (PANTHER); PTHR11475 (PANTHER); IPR019791 (PROSITE_PROFILES); I…	P:GO:0006979; P:GO:0055114; F:GO:0004601; F:GO:0005515; F:GO:0020037	P:response to oxidative stress; P:oxidation-reduction process; F:peroxidase activity; F:protein binding; F:heme binding
EV depleted ESP		DN10181_c0_g1_i1_47181	1053	56433	75	82	45	28	17	3.13		cytosolic malate dehydrogenase	TRUE	[INTERPRO, BLASTED, MAPPED, ANNOTATED]	332	20	0	88.39	8	P:GO:0005975; P:GO:0006099; P:GO:0006108; P:GO:0006734; F:GO:0030060; F:GO:0042803; F:GO:0051287; C:GO:0005737	P:carbohydrate metabolic process; P:tricarboxylic acid cycle; P:malate metabolic process; P:NADH metabolic process; F:L-malate dehydrogenase activity; F:protein homodimerization activity; F:NAD binding; C:cytoplasm	EC:1.1.1.37	Malate dehydrogenase	IPR022383 (PFAM); G3DSA:3.40.50.720 (GENE3D); IPR010945 (TIGRFAM); IPR011274 (TIGRFAM); IPR001236 (PFAM); IPR015955 (G3DSA:3.90.110.GENE3D); IPR001557 (PIRSF); IPR010945 (PANTHER); IPR001252 (PROSITE_PATTERNS); IPR011274 (CDD); IPR036291 (SUPERFAMILY); IPR015955 (SUPERFAMILY)	P:GO:0005975; P:GO:0006108; P:GO:0019752; P:GO:0055114; F:GO:0003824; F:GO:0016491; F:GO:0016615; F:GO:0016616; F:GO:0030060	P:carbohydrate metabolic process; P:malate metabolic process; P:carboxylic acid metabolic process; P:oxidation-reduction process; F:catalytic activity; F:oxidoreductase activity; F:malate dehydrogenase activity; F:oxidoreductase activity, acting on the CH-OH group of donors, NAD or NADP as acceptor; F:L-malate dehydrogenase activity
EV depleted ESP		DN12581_c0_g1_i2_73130	1512	79699	74.3333	70	47	34	24	3.82		Heat shock 70 kDa protein 4	TRUE	[INTERPRO, BLASTED, MAPPED, ANNOTATED]	647	20	0	95.29	3	P:GO:0006457; F:GO:0005524; F:GO:0051082	P:protein folding; F:ATP binding; F:unfolded protein binding			Coil (COILS); PR00301 (PRINTS); G3DSA:3.90.640.10 (GENE3D); IPR029048 (G3DSA:1.20.1270.GENE3D); G3DSA:3.30.30.30 (GENE3D); IPR013126 (PFAM); G3DSA:3.30.420.40 (GENE3D); IPR029047 (G3DSA:2.60.34.GENE3D); G3DSA:3.30.420.40 (GENE3D); mobidb-lite (MOBIDB_LITE); IPR013126 (PANTHER); PTHR19375:SF210 (PANTHER); IPR018181 (PROSITE_PATTERNS); IPR018181 (PROSITE_PATTERNS); IPR018181 (PROSITE_PATTERNS); cd1…	no GO terms	no GO terms
EV depleted ESP		DN10334_c0_g1_i3_17117	1765	106374	68.3333	83	47	34	20	1.89		actin, cytoplasmic type 5	TRUE	[INTERPRO, BLASTED, MAPPED, ANNOTATED]	376	20	0	99.35	15	P:GO:0000281; P:GO:0007409; P:GO:0048870; P:GO:0098974; F:GO:0005524; F:GO:0019901; F:GO:0098973; C:GO:0005884; C:GO:0005886; C:GO:0005925; C:GO:0030424; C:GO:0035060; C:GO:0035267; C:GO:0045202; C:GO:0097433	P:mitotic cytokinesis; P:axonogenesis; P:cell motility; P:postsynaptic actin cytoskeleton organization; F:ATP binding; F:protein kinase binding; F:structural constituent of postsynaptic actin cytoskeleton; C:actin filament; C:plasma membrane; C:focal adhesion; C:axon; C:brahma complex; C:NuA4 histone acetyltransferase complex; C:synapse; C:dense body			IPR004000 (PRINTS); G3DSA:3.30.420.40 (GENE3D); G3DSA:3.30.420.40 (GENE3D); IPR004000 (PFAM); G3DSA:3.90.640.10 (GENE3D); PTHR11937:SF192 (PANTHER); IPR004000 (PANTHER); IPR004001 (PROSITE_PATTERNS); IPR020902 (PROSITE_PATTERNS); IPR004001 (PROSITE_PATTERNS); cd00012 (CDD); IPR043129 (SUPERFAMILY); IPR043129 (SUPERFAMILY)	no GO terms	no GO terms
EV depleted ESP		DN9054_c0_g2_i1_35634	865	104901	62.6667	70	32	47	25	1.59		glycogen phosphorylase	TRUE	[INTERPRO, BLASTED, MAPPED, ANNOTATED]	843	20	0	89.16	5	P:GO:0005975; F:GO:0008184; F:GO:0030170; F:GO:0102250; F:GO:0102499	P:carbohydrate metabolic process; F:glycogen phosphorylase activity; F:pyridoxal phosphate binding; F:linear malto-oligosaccharide phosphorylase activity; F:SHG alpha-glucan phosphorylase activity	EC:2.4.1.1	Glycogen phosphorylase	Coil (COILS); IPR000811 (PIRSF); G3DSA:3.40.50.2000 (GENE3D); G3DSA:3.40.50.2000 (GENE3D); IPR011833 (TIGRFAM); IPR000811 (PFAM); PTHR11468:SF13 (PANTHER); IPR000811 (PANTHER); cd04300 (CDD); SSF53756 (SUPERFAMILY)	P:GO:0005975; F:GO:0004645; F:GO:0008184; F:GO:0030170	P:carbohydrate metabolic process; F:1,4-alpha-oligoglucan phosphorylase activity; F:glycogen phosphorylase activity; F:pyridoxal phosphate binding
EV depleted ESP		DN10161_c0_g1_i1_59685	952	82878	62	65	29	32	15	1.44		fascin 2	TRUE	[INTERPRO, BLASTED, MAPPED, ANNOTATED]	640	20	0	64.77	4	P:GO:0007015; P:GO:0016477; F:GO:0030674; F:GO:0051015	P:actin filament organization; P:cell migration; F:protein-macromolecule adaptor activity; F:actin filament binding			IPR022768 (PFAM); G3DSA:2.80.10.50 (GENE3D); G3DSA:2.80.10.50 (GENE3D); mobidb-lite (MOBIDB_LITE); IPR030146 (PTHR10551:PANTHER); IPR010431 (PANTHER); IPR030146 (PTHR10551:PANTHER); IPR010431 (PANTHER); IPR008999 (SUPERFAMILY); IPR008999 (SUPERFAMILY); IPR008999 (SUPERFAMILY)	P:GO:0007015; P:GO:0016477; P:GO:0030036; F:GO:0030674; F:GO:0051015	P:actin filament organization; P:cell migration; P:actin cytoskeleton organization; F:protein-macromolecule adaptor activity; F:actin filament binding
EV depleted ESP		DN10704_c0_g1_i4_9857	932	105635	60	59	30	41	21	1.5		Lysosomal alpha-glucosidase	TRUE	[INTERPRO, BLASTED, MAPPED, ANNOTATED]	902	20	0	74.25	3	P:GO:0005975; F:GO:0004553; F:GO:0030246	P:carbohydrate metabolic process; F:hydrolase activity, hydrolyzing O-glycosyl compounds; F:carbohydrate binding			G3DSA:4.10.110.10 (GENE3D); G3DSA:3.20.20.80 (GENE3D); G3DSA:2.60.40.1760 (GENE3D); IPR013780 (G3DSA:2.60.40.GENE3D); IPR025887 (PFAM); IPR013780 (G3DSA:2.60.40.GENE3D); IPR000519 (PFAM); IPR000322 (PFAM); IPR031727 (PFAM); PTHR22762:SF63 (PANTHER); PTHR22762 (PANTHER); IPR030458 (PROSITE_PATTERNS); IPR017957 (PROSITE_PATTERNS); IPR030459 (PROSITE_PATTERNS); IPR000519 (PROSITE_PROFILES); cd14752 …	P:GO:0005975; F:GO:0003824; F:GO:0004553; F:GO:0030246	P:carbohydrate metabolic process; F:catalytic activity; F:hydrolase activity, hydrolyzing O-glycosyl compounds; F:carbohydrate binding
EV depleted ESP		DN2510_c0_g1_i1_41860	991	99268	58.6667	64	40	39	21	1.83		gynecophoral canal protein	TRUE	[INTERPRO, BLASTED, MAPPED, ANNOTATED]	781	20	0	74.71	1	F:GO:0005488	F:binding			Coil (COILS); IPR036378 (G3DSA:2.30.180.GENE3D); IPR000782 (PFAM); IPR036378 (G3DSA:2.30.180.GENE3D); PTHR10900 (PANTHER); IPR000782 (PROSITE_PROFILES); IPR000782 (PROSITE_PROFILES); IPR036378 (SUPERFAMILY); IPR036378 (SUPERFAMILY); IPR036378 (SUPERFAMILY)	no GO terms	no GO terms
EV depleted ESP		DN11364_c0_g2_i1_39228	1088	80810	56.6667	57	41	29	23	3.19		phosphoenolpyruvate carboxykinase	TRUE	[INTERPRO, BLASTED, MAPPED, ANNOTATED]	626	20	0	89.31	5	P:GO:0006094; P:GO:0016310; F:GO:0004613; F:GO:0005525; F:GO:0016301	P:gluconeogenesis; P:phosphorylation; F:phosphoenolpyruvate carboxykinase (GTP) activity; F:GTP binding; F:kinase activity	EC:4.1.1.32	Phosphoenolpyruvate carboxykinase (GTP)	IPR013035 (G3DSA:3.90.228.GENE3D); IPR008209 (PIRSF); IPR035077 (PFAM); IPR035078 (PFAM); G3DSA:2.170.8.10 (GENE3D); IPR008210 (G3DSA:3.40.449.GENE3D); PTHR11561:SF0 (PANTHER); IPR008209 (PANTHER); IPR018091 (PROSITE_PATTERNS); IPR008209 (HAMAP); IPR008209 (CDD); SSF53795 (SUPERFAMILY); IPR008210 (SUPERFAMILY)	P:GO:0006094; F:GO:0004611; F:GO:0004613; F:GO:0005525; F:GO:0017076	P:gluconeogenesis; F:phosphoenolpyruvate carboxykinase activity; F:phosphoenolpyruvate carboxykinase (GTP) activity; F:GTP binding; F:purine nucleotide binding
EV depleted ESP		DN6375_c0_g1_i1_15550	1134	59632	55	53	33	30	20	4.58		Protein disulfide-isomerase A3	TRUE	[INTERPRO, BLASTED, MAPPED, ANNOTATED]	478	20	0	70.33	3	P:GO:0045454; F:GO:0003756; C:GO:0016021	P:cell redox homeostasis; F:protein disulfide isomerase activity; C:integral component of membrane	EC:5.3.4.1	Protein disulfide-isomerase	PR00421 (PRINTS); IPR005788 (TIGRFAM); IPR036249 (G3DSA:3.40.30.GENE3D); IPR036249 (G3DSA:3.40.30.GENE3D); IPR036249 (G3DSA:3.40.30.GENE3D); IPR013766 (PFAM); IPR036249 (G3DSA:3.40.30.GENE3D); IPR005792 (TIGRFAM); PF13848 (PFAM); PTHR18929:SF210 (PANTHER); PTHR18929 (PANTHER); IPR017937 (PROSITE_PATTERNS); IPR017937 (PROSITE_PATTERNS); IPR013766 (PROSITE_PROFILES); IPR013766 (PROSITE_PROFILES); c…	F:GO:0003756	F:protein disulfide isomerase activity
EV depleted ESP		DN10879_c1_g1_i8_12057	1406	94038	53.3333	67	46	34	29	2.8		von Willebrand factor A domain containing protein	TRUE	[INTERPRO, BLASTED]	796	20	0	73.96						IPR013694 (PFAM); IPR002035 (PFAM); IPR036465 (G3DSA:3.40.50.GENE3D); PTHR45737:SF6 (PANTHER); PTHR45737 (PANTHER); IPR002035 (PROSITE_PROFILES); IPR013694 (PROSITE_PROFILES); IPR036465 (SUPERFAMILY)	no GO terms	no GO terms
EV depleted ESP	Immunomodulators	DN9786_c0_g1_i1_72692	1568	114026	51.6667	59	33	40	20	1.21		calpain A	TRUE	[INTERPRO, BLASTED, MAPPED, ANNOTATED]	871	20	0	77.64	4	P:GO:0006508; F:GO:0004198; F:GO:0005509; C:GO:0016021	P:proteolysis; F:calcium-dependent cysteine-type endopeptidase activity; F:calcium ion binding; C:integral component of membrane	EC:3.4.22; EC:3.4.22.1; EC:3.4.99; EC:3.4.22.41; EC:3.4.22.40; EC:3.4.22.34; EC:3.4.22.8; EC:3.4.22.28; EC:3.4.22.16; EC:3.4.22.27; EC:3.4.22.38; EC:3.4.22.15; EC:3.4.22.14	Acting on peptide bonds (peptidases); Cathepsin B; Acting on peptide bonds (peptidases); Cathepsin F; Bleomycin hydrolase; Legumain; Clostripain; Picornain 3C; Cathepsin H; Cathepsin S; Cathepsin K; Cathepsin L; Actinidain	IPR022684 (PRINTS); IPR001300 (PFAM); IPR002048 (PFAM); IPR022682 (PFAM); G3DSA:2.60.120.380 (GENE3D); G3DSA:3.90.70.10 (GENE3D); mobidb-lite (MOBIDB_LITE); PTHR10183 (PANTHER); PTHR10183:SF396 (PANTHER); IPR018247 (PROSITE_PATTERNS); IPR000169 (PROSITE_PATTERNS); IPR002048 (PROSITE_PROFILES); IPR001300 (PROSITE_PROFILES); IPR002048 (PROSITE_PROFILES); IPR002048 (PROSITE_PROFILES); IPR033883 (CDD…	P:GO:0006508; F:GO:0004198; F:GO:0005509	P:proteolysis; F:calcium-dependent cysteine-type endopeptidase activity; F:calcium ion binding
EV depleted ESP		DN11694_c0_g1_i1_54338	513	297940	50.3333	50	18	40	16	0.22		Spectrin alpha chain	TRUE	[INTERPRO, BLASTED, MAPPED, ANNOTATED]	2442	20	0	90.89	2	F:GO:0005509; C:GO:0016021	F:calcium ion binding; C:integral component of membrane			Coil (COILS); Coil (COILS); Coil (COILS); Coil (COILS); Coil (COILS); Coil (COILS); Coil (COILS); Coil (COILS); Coil (COILS); Coil (COILS); Coil (COILS); Coil (COILS); Coil (COILS); Coil (COILS); Coil (COILS); Coil (COILS); PR01887 (PRINTS); IPR001452 (PRINTS); IPR014837 (PFAM); G3DSA:1.10.238.10 (GENE3D); G3DSA:1.20.58.60 (GENE3D); G3DSA:2.30.30.40 (GENE3D); IPR001452 (PFAM); G3DSA:1.20.58.60 (G…	F:GO:0005509; F:GO:0005515	F:calcium ion binding; F:protein binding
EV depleted ESP		DN10593_c0_g1_i11_28936	1031	44445	49.6667	83	40	29	19	7.01		putative zinc binding dehydrogenase	TRUE	[INTERPRO, BLASTED, MAPPED, ANNOTATED]	349	20	0	75.9	3	P:GO:0055114; F:GO:0016491; F:GO:0046872	P:oxidation-reduction process; F:oxidoreductase activity; F:metal ion binding			Coil (COILS); IPR013149 (PFAM); G3DSA:3.90.180.10 (GENE3D); G3DSA:3.40.50.720 (GENE3D); IPR013154 (PFAM); PTHR43981 (PANTHER); PTHR43981:SF2 (PANTHER); cd08290 (CDD); IPR036291 (SUPERFAMILY); IPR011032 (SUPERFAMILY)	P:GO:0055114	P:oxidation-reduction process
EV depleted ESP		DN11218_c0_g1_i1_75075	958	52918	49.6667	56	38	29	21	5.9		Phosphoglycerate kinase	TRUE	[INTERPRO, BLASTED, MAPPED, ANNOTATED]	415	20	0	88.65	7	P:GO:0006094; P:GO:0006096; P:GO:1903862; F:GO:0004618; F:GO:0005524; F:GO:0043531; C:GO:0005829	P:gluconeogenesis; P:glycolytic process; P:positive regulation of oxidative phosphorylation; F:phosphoglycerate kinase activity; F:ATP binding; F:ADP binding; C:cytosol	EC:2.7.2.3	Phosphoglycerate kinase	IPR001576 (PRINTS); IPR015824 (G3DSA:3.40.50.GENE3D); IPR001576 (PIRSF); IPR015824 (G3DSA:3.40.50.GENE3D); IPR001576 (PFAM); IPR015824 (G3DSA:3.40.50.GENE3D); IPR001576 (PANTHER); PTHR11406:SF0 (PANTHER); IPR015911 (PROSITE_PATTERNS); IPR001576 (HAMAP); IPR001576 (CDD); IPR036043 (SUPERFAMILY)	P:GO:0006096; F:GO:0004618	P:glycolytic process; F:phosphoglycerate kinase activity
EV depleted ESP		DN10221_c0_g1_i1_65390	909	53501	45.6667	56	33	30	23	4.02		Fructose-bisphosphate aldolase	TRUE	[INTERPRO, BLASTED, MAPPED, ANNOTATED]	374	20	0	91.34	2	P:GO:0006096; F:GO:0004332	P:glycolytic process; F:fructose-bisphosphate aldolase activity	EC:4.1.2.13	Fructose-bisphosphate aldolase	IPR013785 (G3DSA:3.20.20.GENE3D); IPR000741 (PFAM); PTHR11627 (PANTHER); IPR029768 (PROSITE_PATTERNS); cd00948 (CDD); SSF51569 (SUPERFAMILY)	P:GO:0006096; F:GO:0003824; F:GO:0004332	P:glycolytic process; F:catalytic activity; F:fructose-bisphosphate aldolase activity
EV depleted ESP		DN8932_c0_g1_i2_2337	1210	77699	45.3333	52	35	31	20	2.18		NADP-dependent malic enzyme	TRUE	[INTERPRO, BLASTED, MAPPED, ANNOTATED]	574	20	0	80.39	4	P:GO:0055114; F:GO:0004471; F:GO:0046872; F:GO:0051287	P:oxidation-reduction process; F:malate dehydrogenase (decarboxylating) (NAD+) activity; F:metal ion binding; F:NAD binding	EC:1.1.1.38; EC:1.1.1.39	Malate dehydrogenase (oxaloacetate-decarboxylating); Malate dehydrogenase (decarboxylating)	IPR001891 (PRINTS); IPR001891 (PIRSF); IPR012301 (PFAM); G3DSA:3.40.50.720 (GENE3D); IPR012302 (PFAM); IPR037062 (G3DSA:3.40.50.GENE3D); PTHR23406 (PANTHER); PTHR23406:SF34 (PANTHER); IPR015884 (PROSITE_PATTERNS); IPR036291 (SUPERFAMILY); SSF53223 (SUPERFAMILY)	P:GO:0055114; F:GO:0004470; F:GO:0004471; F:GO:0051287	P:oxidation-reduction process; F:malic enzyme activity; F:malate dehydrogenase (decarboxylating) (NAD+) activity; F:NAD binding
EV depleted ESP		DN8953_c0_g1_i6_52210	977	54174	45	45	34	23	20	4.22		actin modulator protein	TRUE	[INTERPRO, BLASTED, MAPPED, ANNOTATED]	366	20	0	88.16	5	P:GO:0045010; P:GO:0051014; P:GO:0051016; F:GO:0005509; F:GO:0051015	P:actin nucleation; P:actin filament severing; P:barbed-end actin filament capping; F:calcium ion binding; F:actin filament binding			IPR007122 (PRINTS); IPR029006 (G3DSA:3.40.20.GENE3D); IPR029006 (G3DSA:3.40.20.GENE3D); IPR029006 (G3DSA:3.40.20.GENE3D); IPR007123 (PFAM); IPR007122 (PANTHER); PTHR11977:SF109 (PANTHER); cd11290 (CDD); cd11289 (CDD); SSF55753 (SUPERFAMILY); SSF55753 (SUPERFAMILY); SSF55753 (SUPERFAMILY)	F:GO:0051015	F:actin filament binding
EV depleted ESP		DN9944_c0_g2_i4_42845	1195	43867	42	80	47	29	15	4.72		ef hand family protein	TRUE	[INTERPRO, BLASTED, MAPPED, ANNOTATED]	319	20	0	83.11	1	F:GO:0005509	F:calcium ion binding			G3DSA:1.10.238.10 (GENE3D); G3DSA:1.10.238.10 (GENE3D); IPR002048 (PFAM); PTHR10827:SF52 (PANTHER); PTHR10827 (PANTHER); IPR018247 (PROSITE_PATTERNS); IPR018247 (PROSITE_PATTERNS); IPR018247 (PROSITE_PATTERNS); IPR018247 (PROSITE_PATTERNS); IPR002048 (PROSITE_PROFILES); IPR002048 (PROSITE_PROFILES); IPR002048 (PROSITE_PROFILES); IPR002048 (PROSITE_PROFILES); IPR002048 (PROSITE_PROFILES); cd16226 …	F:GO:0005509	F:calcium ion binding
EV depleted ESP		DN11614_c0_g2_i3_53973	201	408181	41	45	4	43	4	0.03		expressed conserved protein	TRUE	[INTERPRO, BLASTED, MAPPED, ANNOTATED]	3470	20	0	79.19	4	P:GO:0006468; F:GO:0004672; F:GO:0005524; C:GO:0016021	P:protein phosphorylation; F:protein kinase activity; F:ATP binding; C:integral component of membrane			PR00014 (PRINTS); IPR013783 (G3DSA:2.60.40.GENE3D); IPR013098 (PFAM); IPR013783 (G3DSA:2.60.40.GENE3D); IPR013783 (G3DSA:2.60.40.GENE3D); IPR013783 (G3DSA:2.60.40.GENE3D); IPR000719 (PFAM); IPR013783 (G3DSA:2.60.40.GENE3D); G3DSA:3.30.200.20 (GENE3D); G3DSA:1.10.510.10 (GENE3D); IPR013783 (G3DSA:2.60.40.GENE3D); IPR013783 (G3DSA:2.60.40.GENE3D); IPR003961 (PFAM); mobidb-lite (MOBIDB_LITE); mobidb…	P:GO:0006468; F:GO:0004672; F:GO:0005515; F:GO:0005524	P:protein phosphorylation; F:protein kinase activity; F:protein binding; F:ATP binding
EV depleted ESP	Immunomodulators	DN11960_c0_g1_i1_46290	801	91406	41	50	34	36	25	2.2		molecular chaperone HtpG/HSP90alpha	TRUE	[INTERPRO, BLASTED, MAPPED, ANNOTATED]	743	20	0	90.05	3	P:GO:0006457; F:GO:0005524; F:GO:0051082	P:protein folding; F:ATP binding; F:unfolded protein binding			IPR020575 (PRINTS); IPR037196 (G3DSA:1.20.120.GENE3D); IPR001404 (PIRSF); G3DSA:3.40.50.11260 (GENE3D); IPR003594 (PFAM); G3DSA:3.30.70.2140 (GENE3D); IPR001404 (PFAM); G3DSA:3.30.230.80 (GENE3D); IPR036890 (G3DSA:3.30.565.GENE3D); mobidb-lite (MOBIDB_LITE); mobidb-lite (MOBIDB_LITE); mobidb-lite (MOBIDB_LITE); PTHR11528:SF79 (PANTHER); IPR001404 (PANTHER); IPR019805 (PROSITE_PATTERNS); IPR001404…	P:GO:0006457; F:GO:0005524; F:GO:0051082	P:protein folding; F:ATP binding; F:unfolded protein binding
EV depleted ESP		DN11195_c0_g3_i1_24267	467	281324	40.3333	49	18	44	17	0.22		Spectrin alpha actinin	TRUE	[INTERPRO, BLASTED, MAPPED, ANNOTATED]	2491	20	0	67.75	3	F:GO:0003779; F:GO:0005524; F:GO:0046872	F:actin binding; F:ATP binding; F:metal ion binding			Coil (COILS); Coil (COILS); Coil (COILS); Coil (COILS); Coil (COILS); Coil (COILS); Coil (COILS); Coil (COILS); Coil (COILS); Coil (COILS); Coil (COILS); G3DSA:1.20.58.1940 (GENE3D); IPR002017 (PFAM); G3DSA:1.20.58.1940 (GENE3D); G3DSA:1.20.58.60 (GENE3D); mobidb-lite (MOBIDB_LITE); mobidb-lite (MOBIDB_LITE); mobidb-lite (MOBIDB_LITE); mobidb-lite (MOBIDB_LITE); mobidb-lite (MOBIDB_LITE); mobidb-…	F:GO:0005515	F:protein binding
EV depleted ESP		DN9714_c0_g1_i3_20481	770	119463	39.6667	52	26	28	17	0.96		Basement membrane-specific heparan sulfate proteoglycan core protein	TRUE	[INTERPRO, BLASTED]	845	20	0	76.13						IPR002172 (PRINTS); IPR013783 (G3DSA:2.60.40.GENE3D); IPR036055 (G3DSA:4.10.400.GENE3D); PF13927 (PFAM); IPR013151 (PFAM); IPR036055 (G3DSA:4.10.400.GENE3D); IPR036055 (G3DSA:4.10.400.GENE3D); IPR002172 (PFAM); IPR013783 (G3DSA:2.60.40.GENE3D); IPR013783 (G3DSA:2.60.40.GENE3D); IPR013783 (G3DSA:2.60.40.GENE3D); PTHR12231 (PANTHER); IPR023415 (PROSITE_PATTERNS); IPR002172 (PROSITE_PROFILES); IPR00…	F:GO:0005515	F:protein binding
EV depleted ESP		DN10618_c0_g1_i1_32785	752	86124	39	42	29	22	13	1.27		beta galactosidase	TRUE	[INTERPRO, BLASTED, MAPPED, ANNOTATED]	697	20	0	78.22	4	P:GO:0005975; F:GO:0004565; F:GO:0016409; C:GO:0016021	P:carbohydrate metabolic process; F:beta-galactosidase activity; F:palmitoyltransferase activity; C:integral component of membrane	EC:3.2.1.23	Beta-galactosidase	IPR001944 (PRINTS); IPR008979 (G3DSA:2.60.120.GENE3D); IPR026283 (PIRSF); G3DSA:3.20.20.80 (GENE3D); IPR008979 (G3DSA:2.60.120.GENE3D); IPR031330 (PFAM); IPR001944 (PANTHER); PTHR23421:SF172 (PANTHER); IPR019801 (PROSITE_PATTERNS); IPR008979 (SUPERFAMILY); IPR017853 (SUPERFAMILY)	P:GO:0005975; F:GO:0004553; F:GO:0004565	P:carbohydrate metabolic process; F:hydrolase activity, hydrolyzing O-glycosyl compounds; F:beta-galactosidase activity
EV depleted ESP		DN9107_c0_g1_i1_32351	985	74769	38.6667	41	26	27	17	1.8		transketolase	TRUE	[INTERPRO, BLASTED, MAPPED, ANNOTATED]	655	20	0	86.11	1	F:GO:0004802	F:transketolase activity	EC:2.2.1.1	Transketolase	IPR005474 (PFAM); IPR033248 (PFAM); IPR005475 (PFAM); IPR009014 (G3DSA:3.40.50.GENE3D); G3DSA:3.40.50.970 (GENE3D); G3DSA:3.40.50.970 (GENE3D); PTHR43195 (PANTHER); IPR020826 (PROSITE_PATTERNS); cd07033 (CDD); IPR005474 (CDD); IPR029061 (SUPERFAMILY); IPR029061 (SUPERFAMILY); IPR009014 (SUPERFAMILY)	F:GO:0003824	F:catalytic activity
EV depleted ESP		DN10660_c0_g1_i2_45795	709	73079	37.6667	41	23	32	20	1.75		Glucose-6-phosphate isomerase	TRUE	[INTERPRO, BLASTED, MAPPED, ANNOTATED]	558	20	0	87.65	4	P:GO:0006094; P:GO:0006096; F:GO:0004347; C:GO:0016021	P:gluconeogenesis; P:glycolytic process; F:glucose-6-phosphate isomerase activity; C:integral component of membrane	EC:5.3.1.9	Glucose-6-phosphate isomerase	IPR001672 (PRINTS); IPR023096 (G3DSA:1.10.1390.GENE3D); G3DSA:3.40.50.10490 (GENE3D); IPR001672 (PFAM); G3DSA:3.40.50.10490 (GENE3D); PTHR11469:SF5 (PANTHER); IPR001672 (PANTHER); IPR018189 (PROSITE_PATTERNS); IPR018189 (PROSITE_PATTERNS); IPR001672 (HAMAP); IPR001672 (PROSITE_PROFILES); IPR035476 (CDD); IPR035482 (CDD); SSF53697 (SUPERFAMILY)	P:GO:0006094; P:GO:0006096; F:GO:0004347	P:gluconeogenesis; P:glycolytic process; F:glucose-6-phosphate isomerase activity
EV depleted ESP		DN10270_c0_g1_i2_26817	706	108410	37.3333	64	27	48	22	1.04		puromycin sensitive aminopeptidase	TRUE	[INTERPRO, BLASTED, MAPPED, ANNOTATED]	531	20	0	71.28	4	P:GO:0006508; F:GO:0004177; F:GO:0008237; F:GO:0008270	P:proteolysis; F:aminopeptidase activity; F:metallopeptidase activity; F:zinc ion binding	EC:3.4.11; EC:3.4.11.21; EC:3.4.11.6; EC:3.4.11.5; EC:3.4.11.9	Acting on peptide bonds (peptidases); Aspartyl aminopeptidase; Aminopeptidase B; Prolyl aminopeptidase; Xaa-Pro aminopeptidase	IPR001930 (PRINTS); G3DSA:1.10.390.60 (GENE3D); IPR014782 (PFAM); IPR042097 (G3DSA:2.60.40.GENE3D); PF17900 (PFAM); PTHR11533 (PANTHER); PTHR11533:SF174 (PANTHER); IPR034016 (CDD); IPR042097 (SUPERFAMILY); SSF55486 (SUPERFAMILY)	P:GO:0006508; F:GO:0008237; F:GO:0008270	P:proteolysis; F:metallopeptidase activity; F:zinc ion binding
EV depleted ESP		DN10458_c0_g1_i1_34309	638	155218	37	38	22	31	17	0.58		calsyntenin 1	TRUE	[INTERPRO, BLASTED, MAPPED, ANNOTATED]	1239	20	0	70.15	2	F:GO:0005509; C:GO:0016021	F:calcium ion binding; C:integral component of membrane			G3DSA:2.60.40.60 (GENE3D); mobidb-lite (MOBIDB_LITE); mobidb-lite (MOBIDB_LITE); mobidb-lite (MOBIDB_LITE); mobidb-lite (MOBIDB_LITE); IPR026914 (PANTHER); IPR002126 (PROSITE_PROFILES); cd11304 (CDD); cd11304 (CDD); IPR015919 (SUPERFAMILY)	P:GO:0007156; F:GO:0005509; C:GO:0016020	P:homophilic cell adhesion via plasma membrane adhesion molecules; F:calcium ion binding; C:membrane
EV depleted ESP		DN7995_c0_g1_i1_6847	653	88744	36.6667	35	23	24	16	1.22		gynecophoral canal protein	TRUE	[INTERPRO, BLASTED]	310	20	4.31594e-177	73.88						IPR000782 (PFAM); IPR036378 (G3DSA:2.30.180.GENE3D); IPR000782 (PROSITE_PROFILES); IPR036378 (SUPERFAMILY)	no GO terms	no GO terms
EV depleted ESP		DN8664_c0_g1_i1_13160	1104	72680	36.6667	57	38	28	16	1.76		glycerol kinase	TRUE	[INTERPRO, BLASTED, MAPPED, ANNOTATED]	411	20	0	77.88	4	P:GO:0005975; P:GO:0016310; F:GO:0016301; F:GO:0016773	P:carbohydrate metabolic process; P:phosphorylation; F:kinase activity; F:phosphotransferase activity, alcohol group as acceptor			G3DSA:3.30.420.40 (GENE3D); IPR018485 (PFAM); IPR018484 (PFAM); G3DSA:3.30.420.40 (GENE3D); PTHR10196:SF69 (PANTHER); PTHR10196 (PANTHER); IPR018483 (PROSITE_PATTERNS); IPR043129 (SUPERFAMILY); IPR043129 (SUPERFAMILY)	P:GO:0005975; F:GO:0016773	P:carbohydrate metabolic process; F:phosphotransferase activity, alcohol group as acceptor
EV depleted ESP		DN8251_c0_g1_i1_16141	725	115391	36.3333	36	22	23	14	0.7		Peptidyl-glycine alpha-amidating monooxygenase A	TRUE	[INTERPRO, BLASTED, MAPPED, ANNOTATED]	838	20	0	65.74	5	P:GO:0006518; P:GO:0055114; F:GO:0005507; F:GO:0016715; C:GO:0016021	P:peptide metabolic process; P:oxidation-reduction process; F:copper ion binding; F:oxidoreductase activity, acting on paired donors, with incorporation or reduction of molecular oxygen, reduced ascorbate as one donor, and incorporation of one atom of oxygen; C:integral component of membrane	EC:1.14.17	Acting on paired donors, with incorporation or reduction of molecular oxygen. The oxygen incorporated need not be derived from O(2)	IPR000720 (PRINTS); IPR024548 (PFAM); IPR001258 (PFAM); IPR036939 (G3DSA:2.60.120.GENE3D); IPR014784 (G3DSA:2.60.120.GENE3D); IPR000323 (PFAM); IPR011042 (G3DSA:2.120.10.GENE3D); PTHR10680 (PANTHER); PTHR10680:SF14 (PANTHER); IPR013017 (PROSITE_PROFILES); IPR013017 (PROSITE_PROFILES); IPR013017 (PROSITE_PROFILES); cd14958 (CDD); IPR008977 (SUPERFAMILY); IPR008977 (SUPERFAMILY); SSF101898 (SUPERFA…	P:GO:0006518; P:GO:0055114; F:GO:0003824; F:GO:0004497; F:GO:0005507; F:GO:0005515; F:GO:0016715; C:GO:0016020	P:peptide metabolic process; P:oxidation-reduction process; F:catalytic activity; F:monooxygenase activity; F:copper ion binding; F:protein binding; F:oxidoreductase activity, acting on paired donors, with incorporation or reduction of molecular oxygen, reduced ascorbate as one donor, and incorporation of one atom of oxygen; C:membrane
EV depleted ESP		DN9865_c0_g1_i1_63028	1436	48202	36.3333	42	33	17	12	2.76		hypothetical transcript	TRUE	[INTERPRO, BLASTED, MAPPED, ANNOTATED]	344	20	0	76.67	3	P:GO:0030833; F:GO:0043167; F:GO:0051015	P:regulation of actin filament polymerization; F:ion binding; F:actin filament binding			IPR007122 (PRINTS); IPR029006 (G3DSA:3.40.20.GENE3D); IPR029006 (G3DSA:3.40.20.GENE3D); IPR007123 (PFAM); IPR029006 (G3DSA:3.40.20.GENE3D); IPR007122 (PANTHER); PTHR11977:SF109 (PANTHER); SSF55753 (SUPERFAMILY); SSF55753 (SUPERFAMILY); SSF55753 (SUPERFAMILY)	F:GO:0051015	F:actin filament binding
EV depleted ESP		DN10697_c0_g3_i1_6876	642	53200	36	45	26	31	20	3.23		adenylosuccinate synthetase	TRUE	[INTERPRO, BLASTED, MAPPED, ANNOTATED]	431	20	0	82.03	5	P:GO:0044208; F:GO:0000287; F:GO:0004019; F:GO:0005525; C:GO:0005737	P:'de novo' AMP biosynthetic process; F:magnesium ion binding; F:adenylosuccinate synthase activity; F:GTP binding; C:cytoplasm	EC:6.3.4.4	Adenylosuccinate synthase	IPR042110 (G3DSA:1.10.300.GENE3D); IPR001114 (TIGRFAM); IPR042111 (G3DSA:3.90.170.GENE3D); IPR001114 (PFAM); IPR042109 (G3DSA:3.40.440.GENE3D); IPR001114 (PANTHER); IPR033128 (PROSITE_PATTERNS); IPR018220 (PROSITE_PATTERNS); IPR001114 (HAMAP); IPR001114 (CDD); IPR027417 (SUPERFAMILY)	P:GO:0006164; F:GO:0004019; F:GO:0005525	P:purine nucleotide biosynthetic process; F:adenylosuccinate synthase activity; F:GTP binding
EV depleted ESP		DN11811_c2_g4_i1_55908	810	70401	35.3333	46	26	35	18	1.85		Glucose-6-phosphate 1-dehydrogenase	TRUE	[INTERPRO, BLASTED, MAPPED, ANNOTATED]	494	20	0	84.21	4	P:GO:0006006; P:GO:0006098; F:GO:0004345; F:GO:0050661	P:glucose metabolic process; P:pentose-phosphate shunt; F:glucose-6-phosphate dehydrogenase activity; F:NADP binding	EC:1.1.1.49	Glucose-6-phosphate dehydrogenase (NADP(+))	IPR001282 (PRINTS); G3DSA:3.30.360.10 (GENE3D); IPR022674 (PFAM); IPR022675 (PFAM); IPR001282 (PIRSF); IPR001282 (TIGRFAM); G3DSA:3.40.50.720 (GENE3D); PTHR23429:SF0 (PANTHER); IPR001282 (PANTHER); IPR019796 (PROSITE_PATTERNS); IPR001282 (HAMAP); SSF55347 (SUPERFAMILY); IPR036291 (SUPERFAMILY)	P:GO:0006006; P:GO:0055114; F:GO:0004345; F:GO:0016614; F:GO:0050661	P:glucose metabolic process; P:oxidation-reduction process; F:glucose-6-phosphate dehydrogenase activity; F:oxidoreductase activity, acting on CH-OH group of donors; F:NADP binding
EV depleted ESP		DN12309_c0_g1_i3_64783	1378	255163	35	84	53	72	45	0.93		putative myosin-10 (Myosin heavy chain, nonmuscle IIb) (Nonmuscle myosin heavy chain IIb) (NMMHC II-b) (NMMHC-IIB) (Cellular myosin heavy chain, type B) (Nonmuscle myosin heavy chain-B) (NMMHC-B)	TRUE	[INTERPRO, BLASTED, MAPPED, ANNOTATED]	2028	20	0	82.79	5	F:GO:0003774; F:GO:0005524; F:GO:0051015; C:GO:0016021; C:GO:0016459	F:motor activity; F:ATP binding; F:actin filament binding; C:integral component of membrane; C:myosin complex	EC:3.6.1.15	Nucleoside-triphosphate phosphatase	Coil (COILS); Coil (COILS); Coil (COILS); Coil (COILS); Coil (COILS); Coil (COILS); Coil (COILS); Coil (COILS); Coil (COILS); Coil (COILS); Coil (COILS); IPR001609 (PRINTS); IPR008989 (G3DSA:2.30.30.GENE3D); IPR036961 (G3DSA:3.40.850.GENE3D); IPR004009 (PFAM); IPR002928 (PFAM); G3DSA:1.20.120.720 (GENE3D); G3DSA:1.20.5.340 (GENE3D); IPR001609 (PFAM); G3DSA:3.30.70.3240 (GENE3D); G3DSA:1.20.58.530…	F:GO:0003774; F:GO:0005515; F:GO:0005524; F:GO:0051015; C:GO:0016459	F:motor activity; F:protein binding; F:ATP binding; F:actin filament binding; C:myosin complex
EV depleted ESP		DN11119_c0_g1_i2_24053	70	385958	34	31	3	24	3	0.03		expressed conserved protein	TRUE	[INTERPRO, BLASTED, MAPPED, ANNOTATED]	3425	20	0	77.33	4	P:GO:0006468; F:GO:0004672; F:GO:0005524; C:GO:0016021	P:protein phosphorylation; F:protein kinase activity; F:ATP binding; C:integral component of membrane			PR00014 (PRINTS); IPR013098 (PFAM); IPR013783 (G3DSA:2.60.40.GENE3D); IPR013783 (G3DSA:2.60.40.GENE3D); G3DSA:1.10.510.10 (GENE3D); IPR013783 (G3DSA:2.60.40.GENE3D); IPR013783 (G3DSA:2.60.40.GENE3D); IPR000719 (PFAM); G3DSA:3.30.200.20 (GENE3D); IPR013783 (G3DSA:2.60.40.GENE3D); IPR013783 (G3DSA:2.60.40.GENE3D); IPR013783 (G3DSA:2.60.40.GENE3D); IPR013783 (G3DSA:2.60.40.GENE3D); IPR013783 (G3DSA:…	P:GO:0006468; F:GO:0004672; F:GO:0005515; F:GO:0005524	P:protein phosphorylation; F:protein kinase activity; F:protein binding; F:ATP binding
EV depleted ESP		DN1602_c0_g1_i1_69974	662	78036	33.6667	36	22	24	13	1.1		Putative actin-interacting protein 1	TRUE	[INTERPRO, BLASTED]	617	20	0	76.43						IPR015943 (G3DSA:2.130.10.GENE3D); IPR001680 (PFAM); IPR015943 (G3DSA:2.130.10.GENE3D); PTHR19856 (PANTHER); PTHR19856:SF0 (PANTHER); IPR019775 (PROSITE_PATTERNS); IPR001680 (PROSITE_PROFILES); IPR001680 (PROSITE_PROFILES); IPR001680 (PROSITE_PROFILES); IPR001680 (PROSITE_PROFILES); IPR017986 (PROSITE_PROFILES); IPR001680 (PROSITE_PROFILES); cd00200 (CDD); IPR036322 (SUPERFAMILY); SSF69322 (SUPER…	F:GO:0005515	F:protein binding
EV depleted ESP		DN7822_c0_g2_i1_27391	218	355542	33.6667	34	6	29	5	0.06		expressed conserved protein	TRUE	[INTERPRO, BLASTED, MAPPED, ANNOTATED]	3027	20	0	58.28	3	P:GO:0045104; F:GO:0008092; C:GO:0005856	P:intermediate filament cytoskeleton organization; F:cytoskeletal protein binding; C:cytoskeleton			Coil (COILS); Coil (COILS); Coil (COILS); IPR041615 (PFAM); G3DSA:1.20.58.60 (GENE3D); G3DSA:2.30.30.40 (GENE3D); mobidb-lite (MOBIDB_LITE); mobidb-lite (MOBIDB_LITE); mobidb-lite (MOBIDB_LITE); mobidb-lite (MOBIDB_LITE); mobidb-lite (MOBIDB_LITE); mobidb-lite (MOBIDB_LITE); mobidb-lite (MOBIDB_LITE); mobidb-lite (MOBIDB_LITE); IPR043197 (PANTHER); PTHR23169:SF23 (PANTHER)	P:GO:0045104	P:intermediate filament cytoskeleton organization
EV depleted ESP		DN10270_c0_g1_i1_26816	595	111348	33	43	22	38	19	0.89		puromycin sensitive aminopeptidase	TRUE	[INTERPRO, BLASTED, MAPPED, ANNOTATED]	918	20	0	67.78	4	P:GO:0006508; F:GO:0004177; F:GO:0008237; F:GO:0008270	P:proteolysis; F:aminopeptidase activity; F:metallopeptidase activity; F:zinc ion binding	EC:3.4.11; EC:3.4.11.21; EC:3.4.11.6; EC:3.4.11.5; EC:3.4.11.9	Acting on peptide bonds (peptidases); Aspartyl aminopeptidase; Aminopeptidase B; Prolyl aminopeptidase; Xaa-Pro aminopeptidase	IPR001930 (PRINTS); IPR024571 (PFAM); IPR042097 (G3DSA:2.60.40.GENE3D); PF17900 (PFAM); G3DSA:1.10.390.60 (GENE3D); IPR014782 (PFAM); G3DSA:2.60.40.1910 (GENE3D); G3DSA:1.25.50.20 (GENE3D); PTHR11533:SF174 (PANTHER); PTHR11533 (PANTHER); IPR034016 (CDD); SSF55486 (SUPERFAMILY); IPR042097 (SUPERFAMILY)	P:GO:0006508; F:GO:0008237; F:GO:0008270	P:proteolysis; F:metallopeptidase activity; F:zinc ion binding
EV depleted ESP		DN12341_c1_g3_i1_64791	488	78610	33	33	14	22	11	0.63		phosphoglucomutase	TRUE	[INTERPRO, BLASTED, MAPPED, ANNOTATED]	587	20	0	81.02	7	P:GO:0005975; P:GO:0090502; F:GO:0000287; F:GO:0003676; F:GO:0004523; F:GO:0016868; C:GO:0016020	P:carbohydrate metabolic process; P:RNA phosphodiester bond hydrolysis, endonucleolytic; F:magnesium ion binding; F:nucleic acid binding; F:RNA-DNA hybrid ribonuclease activity; F:intramolecular transferase activity, phosphotransferases; C:membrane	EC:3.1.30; EC:3.1.26; EC:3.1.26.4	Acting on ester bonds; Acting on ester bonds; Ribonuclease H	IPR005841 (PRINTS); G3DSA:3.40.120.10 (GENE3D); IPR005846 (PFAM); G3DSA:3.30.310.50 (GENE3D); IPR005845 (PFAM); IPR005844 (PFAM); G3DSA:3.40.120.10 (GENE3D); G3DSA:3.40.120.10 (GENE3D); mobidb-lite (MOBIDB_LITE); PTHR22573 (PANTHER); IPR016066 (PROSITE_PATTERNS); IPR016055 (SUPERFAMILY); IPR016055 (SUPERFAMILY); IPR036900 (SUPERFAMILY); IPR016055 (SUPERFAMILY)	P:GO:0005975; P:GO:0071704; F:GO:0000287; F:GO:0016868	P:carbohydrate metabolic process; P:organic substance metabolic process; F:magnesium ion binding; F:intramolecular transferase activity, phosphotransferases
EV depleted ESP		DN11247_c1_g1_i4_75101	449	147344	32.6667	41	18	37	17	0.48		ubiquitin modifier activating enzyme 1	TRUE	[INTERPRO, BLASTED, MAPPED, ANNOTATED]	1059	20	0	82.58	3	P:GO:0006464; F:GO:0005524; F:GO:0008641	P:cellular protein modification process; F:ATP binding; F:ubiquitin-like modifier activating enzyme activity			Coil (COILS); IPR000011 (PRINTS); G3DSA:3.40.50.12550 (GENE3D); IPR000594 (PFAM); IPR038252 (G3DSA:3.10.290.GENE3D); IPR018965 (PFAM); IPR000594 (PFAM); IPR019572 (PFAM); IPR042449 (G3DSA:3.50.50.GENE3D); IPR032420 (PFAM); IPR042063 (G3DSA:1.10.10.GENE3D); G3DSA:3.40.50.720 (GENE3D); IPR018075 (TIGRFAM); IPR042302 (G3DSA:2.40.30.GENE3D); IPR032418 (PFAM); mobidb-lite (MOBIDB_LITE); PTHR10953:SF19…	P:GO:0006464; F:GO:0008641	P:cellular protein modification process; F:ubiquitin-like modifier activating enzyme activity
EV depleted ESP		DN4872_c0_g1_i1_43079	784	30242	32.3333	69	29	25	17	8.97		peptidyl prolyl cis trans isomerase B	TRUE	[INTERPRO, BLASTED, MAPPED, ANNOTATED]	223	20	5.92672e-122	81.18	9	P:GO:0000413; P:GO:0006457; P:GO:0044794; F:GO:0003755; F:GO:0005488; C:GO:0005753; C:GO:0005783; C:GO:0016021; C:GO:0070013	P:protein peptidyl-prolyl isomerization; P:protein folding; P:positive regulation by host of viral process; F:peptidyl-prolyl cis-trans isomerase activity; F:binding; C:mitochondrial proton-transporting ATP synthase complex; C:endoplasmic reticulum; C:integral component of membrane; C:intracellular organelle lumen	EC:5.2.1.8	Peptidylprolyl isomerase	IPR002130 (PRINTS); IPR029000 (G3DSA:2.40.100.GENE3D); IPR002130 (PFAM); PTHR11071:SF477 (PANTHER); PTHR11071 (PANTHER); IPR020892 (PROSITE_PATTERNS); IPR002130 (PROSITE_PROFILES); IPR029000 (SUPERFAMILY)	P:GO:0000413; P:GO:0006457; F:GO:0003755	P:protein peptidyl-prolyl isomerization; P:protein folding; F:peptidyl-prolyl cis-trans isomerase activity
EV depleted ESP		DN10026_c0_g1_i2_27828	202	259539	31.3333	26	9	22	9	0.12		myosin XV	TRUE	[INTERPRO, BLASTED, MAPPED, ANNOTATED]	2186	20	0	80.26	5	P:GO:0007605; F:GO:0003774; F:GO:0003779; F:GO:0005524; C:GO:0016459	P:sensory perception of sound; F:motor activity; F:actin binding; F:ATP binding; C:myosin complex	EC:3.6.1.15	Nucleoside-triphosphate phosphatase	Coil (COILS); IPR001609 (PRINTS); G3DSA:1.20.120.720 (GENE3D); IPR036961 (G3DSA:3.40.850.GENE3D); IPR000048 (PFAM); IPR000857 (PFAM); IPR001609 (PFAM); G3DSA:1.20.58.530 (GENE3D); IPR038185 (G3DSA:1.25.40.GENE3D); G3DSA:3.30.70.3240 (GENE3D); G3DSA:1.20.5.190 (GENE3D); G3DSA:1.10.10.820 (GENE3D); mobidb-lite (MOBIDB_LITE); mobidb-lite (MOBIDB_LITE); mobidb-lite (MOBIDB_LITE); mobidb-lite (MOBIDB_…	F:GO:0003774; F:GO:0005515; F:GO:0005524; C:GO:0005856; C:GO:0016459	F:motor activity; F:protein binding; F:ATP binding; C:cytoskeleton; C:myosin complex
EV depleted ESP		DN9975_c0_g1_i2_17599	537	114488	31.3333	34	20	27	17	0.71		neutral alpha glucosidase AB	TRUE	[INTERPRO, BLASTED, MAPPED, ANNOTATED]	954	20	0	74.52	3	P:GO:0005975; F:GO:0004553; F:GO:0030246	P:carbohydrate metabolic process; F:hydrolase activity, hydrolyzing O-glycosyl compounds; F:carbohydrate binding			IPR000322 (PFAM); G3DSA:3.20.20.80 (GENE3D); IPR025887 (PFAM); IPR013780 (G3DSA:2.60.40.GENE3D); IPR013780 (G3DSA:2.60.40.GENE3D); mobidb-lite (MOBIDB_LITE); mobidb-lite (MOBIDB_LITE); PTHR22762:SF118 (PANTHER); PTHR22762 (PANTHER); cd06603 (CDD); cd14752 (CDD); SSF51011 (SUPERFAMILY); IPR017853 (SUPERFAMILY); IPR011013 (SUPERFAMILY)	P:GO:0005975; F:GO:0003824; F:GO:0004553; F:GO:0030246	P:carbohydrate metabolic process; F:catalytic activity; F:hydrolase activity, hydrolyzing O-glycosyl compounds; F:carbohydrate binding
EV depleted ESP		DN10334_c0_g1_i1_17115	778	108822	31	33	17	25	10	0.61		actin, cytoplasmic type 5	TRUE	[INTERPRO, BLASTED, MAPPED, ANNOTATED]	376	20	0	99.35	15	P:GO:0000281; P:GO:0007409; P:GO:0048870; P:GO:0098974; F:GO:0005524; F:GO:0019901; F:GO:0098973; C:GO:0005884; C:GO:0005886; C:GO:0005925; C:GO:0030424; C:GO:0035060; C:GO:0035267; C:GO:0045202; C:GO:0097433	P:mitotic cytokinesis; P:axonogenesis; P:cell motility; P:postsynaptic actin cytoskeleton organization; F:ATP binding; F:protein kinase binding; F:structural constituent of postsynaptic actin cytoskeleton; C:actin filament; C:plasma membrane; C:focal adhesion; C:axon; C:brahma complex; C:NuA4 histone acetyltransferase complex; C:synapse; C:dense body			IPR004000 (PRINTS); G3DSA:3.30.420.40 (GENE3D); G3DSA:3.30.420.40 (GENE3D); IPR004000 (PFAM); G3DSA:3.90.640.10 (GENE3D); PTHR11937:SF192 (PANTHER); IPR004000 (PANTHER); IPR004001 (PROSITE_PATTERNS); IPR020902 (PROSITE_PATTERNS); IPR004001 (PROSITE_PATTERNS); cd00012 (CDD); IPR043129 (SUPERFAMILY); IPR043129 (SUPERFAMILY)	no GO terms	no GO terms
EV depleted ESP		DN11822_c0_g2_i2_55872	878	34766	31	47	25	14	7	1.73		P29	TRUE	[INTERPRO, BLASTED, MAPPED, ANNOTATED]	136	20	5.54159e-59	84.57	1	C:GO:0005737	C:cytoplasm			Coil (COILS); Coil (COILS); IPR004148 (PFAM); IPR027267 (G3DSA:1.20.1270.GENE3D); IPR004148 (PROSITE_PROFILES); IPR027267 (SUPERFAMILY)	F:GO:0005515; C:GO:0005737	F:protein binding; C:cytoplasm
EV depleted ESP		DN10746_c0_g1_i6_22331	601	242797	30	35	13	26	11	0.19		expressed conserved protein	TRUE	[INTERPRO, BLASTED]	2104	20	0	64.2						mobidb-lite (MOBIDB_LITE); mobidb-lite (MOBIDB_LITE); mobidb-lite (MOBIDB_LITE)	no GO terms	no GO terms
EV depleted ESP		DN6084_c0_g1_i1_30545	684	91195	30	32	22	27	18	1.1		dipeptidyl peptidase 3	TRUE	[INTERPRO, BLASTED, MAPPED, ANNOTATED]	725	20	0	79.9	5	P:GO:0006508; F:GO:0008239; F:GO:0046872; F:GO:0070006; C:GO:0005737	P:proteolysis; F:dipeptidyl-peptidase activity; F:metal ion binding; F:metalloaminopeptidase activity; C:cytoplasm	EC:3.4.11; EC:3.4.11.21; EC:3.4.14.4; EC:3.4.11.6; EC:3.4.11.5; EC:3.4.11.9; EC:3.4.14.11	Acting on peptide bonds (peptidases); Aspartyl aminopeptidase; Dipeptidyl-peptidase III; Aminopeptidase B; Prolyl aminopeptidase; Xaa-Pro aminopeptidase; Xaa-Pro dipeptidyl-peptidase	IPR005317 (PIRSF); IPR039461 (PFAM); G3DSA:3.30.70.2600 (GENE3D); G3DSA:1.20.120.1470 (GENE3D); PTHR23422:SF11 (PANTHER); IPR039461 (PANTHER)	P:GO:0006508; F:GO:0008239; F:GO:0070006; C:GO:0005737	P:proteolysis; F:dipeptidyl-peptidase activity; F:metalloaminopeptidase activity; C:cytoplasm
EV depleted ESP		DN10367_c0_g1_i3_29401	656	55896	29.6667	33	20	18	12	1.23		expressed conserved protein	TRUE	[INTERPRO, BLASTED]	418	8	1.18536e-33	61.91						IPR043792 (PFAM); mobidb-lite (MOBIDB_LITE); mobidb-lite (MOBIDB_LITE); mobidb-lite (MOBIDB_LITE); mobidb-lite (MOBIDB_LITE); mobidb-lite (MOBIDB_LITE); mobidb-lite (MOBIDB_LITE); mobidb-lite (MOBIDB_LITE); mobidb-lite (MOBIDB_LITE)	no GO terms	no GO terms
EV depleted ESP		DN10844_c0_g1_i3_76359	641	61978	29	35	20	29	15	1.67		6-phosphogluconate dehydrogenase, decarboxylating	TRUE	[INTERPRO, BLASTED, MAPPED, ANNOTATED]	512	20	0	79.74	4	P:GO:0006098; P:GO:0019521; F:GO:0004616; F:GO:0050661	P:pentose-phosphate shunt; P:D-gluconate metabolic process; F:phosphogluconate dehydrogenase (decarboxylating) activity; F:NADP binding	EC:1.1.1.44	Phosphogluconate dehydrogenase (NADP(+)-dependent, decarboxylating)	IPR006183 (PRINTS); IPR013328 (G3DSA:1.10.1040.GENE3D); IPR006113 (TIGRFAM); IPR006115 (PFAM); G3DSA:3.40.50.720 (GENE3D); G3DSA:1.20.5.320 (GENE3D); IPR006113 (PIRSF); IPR006114 (PFAM); PTHR11811:SF50 (PANTHER); IPR006183 (PANTHER); IPR006184 (PROSITE_PATTERNS); IPR036291 (SUPERFAMILY); IPR008927 (SUPERFAMILY)	P:GO:0006098; P:GO:0055114; F:GO:0004616; F:GO:0016491; F:GO:0050661	P:pentose-phosphate shunt; P:oxidation-reduction process; F:phosphogluconate dehydrogenase (decarboxylating) activity; F:oxidoreductase activity; F:NADP binding
EV depleted ESP		DN12317_c0_g1_i4_39494	273	102681	28.6667	35	6	22	5	0.17		beta D xylosidase 2	TRUE	[INTERPRO, BLASTED, MAPPED, ANNOTATED]	830	20	0	70.71	2	P:GO:0005975; F:GO:0004553	P:carbohydrate metabolic process; F:hydrolase activity, hydrolyzing O-glycosyl compounds			IPR001764 (PRINTS); IPR002772 (PFAM); IPR013783 (G3DSA:2.60.40.GENE3D); IPR036881 (G3DSA:3.40.50.GENE3D); IPR001764 (PFAM); IPR036962 (G3DSA:3.20.20.GENE3D); IPR026891 (PFAM); PTHR42721:SF32 (PANTHER); PTHR42721 (PANTHER); IPR036881 (SUPERFAMILY); IPR017853 (SUPERFAMILY)	P:GO:0005975; F:GO:0004553	P:carbohydrate metabolic process; F:hydrolase activity, hydrolyzing O-glycosyl compounds
EV depleted ESP		DN10335_c1_g1_i3_29500	328	244857	28.3333	32	13	28	12	0.19		hemicentin 1	TRUE	[INTERPRO, BLASTED, MAPPED, ANNOTATED]	2123	20	0	77.4	2	F:GO:0003824; F:GO:0005509	F:catalytic activity; F:calcium ion binding			Coil (COILS); PR01705 (PRINTS); IPR013783 (G3DSA:2.60.40.GENE3D); G3DSA:2.10.25.10 (GENE3D); IPR013098 (PFAM); G3DSA:2.10.25.10 (GENE3D); IPR013783 (G3DSA:2.60.40.GENE3D); IPR013783 (G3DSA:2.60.40.GENE3D); IPR013783 (G3DSA:2.60.40.GENE3D); G3DSA:2.10.25.10 (GENE3D); IPR013783 (G3DSA:2.60.40.GENE3D); PF13927 (PFAM); G3DSA:2.10.25.10 (GENE3D); IPR013783 (G3DSA:2.60.40.GENE3D); IPR001881 (PFAM); IPR…	F:GO:0005509	F:calcium ion binding
EV depleted ESP		DN9986_c1_g1_i1_30100	155	237304	28	35	3	26	2	0.04		expressed conserved protein	TRUE	[INTERPRO, BLASTED]	2048	20	0	64.06						mobidb-lite (MOBIDB_LITE); mobidb-lite (MOBIDB_LITE); mobidb-lite (MOBIDB_LITE)	no GO terms	no GO terms
EV depleted ESP		DN11977_c0_g1_i2_72857	874	76076	27.6667	37	24	24	15	1.43		H17g protein tegumental antigen	TRUE	[INTERPRO, BLASTED, MAPPED, ANNOTATED]	563	20	0	87.45	2	F:GO:0003779; C:GO:0005856	F:actin binding; C:cytoskeleton			Coil (COILS); Coil (COILS); IPR000798 (PRINTS); IPR019749 (PRINTS); IPR011174 (PIRSF); IPR018979 (PFAM); IPR011259 (PFAM); IPR011993 (G3DSA:2.30.29.GENE3D); IPR018980 (PFAM); G3DSA:1.20.5.450 (GENE3D); G3DSA:3.10.20.90 (GENE3D); IPR014352 (G3DSA:1.20.80.GENE3D); IPR019748 (PFAM); IPR008954 (G3DSA:1.25.40.GENE3D); mobidb-lite (MOBIDB_LITE); mobidb-lite (MOBIDB_LITE); PTHR23281 (PANTHER); PTHR23281…	F:GO:0003779; F:GO:0008092; C:GO:0005856	F:actin binding; F:cytoskeletal protein binding; C:cytoskeleton
EV depleted ESP		DN2084_c0_g1_i1_26571	339	73876	27.6667	30	16	23	12	1		Basement membrane-specific heparan sulfate proteoglycan core protein	TRUE	[INTERPRO, BLASTED, MAPPED, ANNOTATED]	671	20	0	60.57	1	C:GO:0016021	C:integral component of membrane			mobidb-lite (MOBIDB_LITE); IPR007110 (PROSITE_PROFILES); IPR007110 (PROSITE_PROFILES)	no GO terms	no GO terms
EV depleted ESP		DN10972_c0_g1_i1_50892	51	198195	27.3333	37	1	18	1	0.02		Chromodomain-helicase-DNA-binding protein	TRUE	[INTERPRO, BLASTED, MAPPED, ANNOTATED]	1643	20	0	60.39	2	F:GO:0097159; F:GO:1901363	F:organic cyclic compound binding; F:heterocyclic compound binding			Coil (COILS); IPR001650 (PFAM); IPR000330 (PFAM); IPR038718 (G3DSA:3.40.50.GENE3D); IPR009462 (PFAM); IPR012957 (PFAM); G3DSA:3.40.50.300 (GENE3D); mobidb-lite (MOBIDB_LITE); mobidb-lite (MOBIDB_LITE); mobidb-lite (MOBIDB_LITE); mobidb-lite (MOBIDB_LITE); mobidb-lite (MOBIDB_LITE); mobidb-lite (MOBIDB_LITE); mobidb-lite (MOBIDB_LITE); PTHR45623 (PANTHER); IPR014001 (PROSITE_PROFILES); IPR001650 (…	F:GO:0005524	F:ATP binding
EV depleted ESP		DN11704_c0_g1_i7_61110	431	85995	27.3333	28	14	20	9	0.63		Heat shock 70 kDa protein 4	TRUE	[INTERPRO, BLASTED, MAPPED, ANNOTATED]	664	20	0	95.23	3	P:GO:0006457; F:GO:0005524; F:GO:0051082	P:protein folding; F:ATP binding; F:unfolded protein binding			Coil (COILS); PR00301 (PRINTS); G3DSA:3.30.30.30 (GENE3D); IPR029047 (G3DSA:2.60.34.GENE3D); G3DSA:3.90.640.10 (GENE3D); G3DSA:3.30.420.40 (GENE3D); IPR029048 (G3DSA:1.20.1270.GENE3D); IPR013126 (PFAM); G3DSA:3.30.420.40 (GENE3D); mobidb-lite (MOBIDB_LITE); IPR013126 (PANTHER); PTHR19375:SF210 (PANTHER); IPR018181 (PROSITE_PATTERNS); IPR018181 (PROSITE_PATTERNS); IPR018181 (PROSITE_PATTERNS); cd1…	no GO terms	no GO terms
EV depleted ESP		DN5781_c0_g1_i1_2927	869	27485	26.6667	38	26	19	14	7.77		tegumental antigen	TRUE	[INTERPRO, BLASTED, MAPPED, ANNOTATED]	194	20	1.11707e-95	72.23	3	P:GO:0007017; F:GO:0005509; C:GO:0030286	P:microtubule-based process; F:calcium ion binding; C:dynein complex			IPR001372 (PFAM); IPR037177 (G3DSA:3.30.740.GENE3D); IPR037177 (SUPERFAMILY)	P:GO:0007017; C:GO:0030286	P:microtubule-based process; C:dynein complex
EV depleted ESP		DN12512_c1_g2_i13_73167	383	40540	26.3333	36	18	16	9	1.56		S-formylglutathione hydrolase	TRUE	[INTERPRO, BLASTED, MAPPED, ANNOTATED]	137	20	4.58027e-64	76.71	4	P:GO:0046294; F:GO:0018738; F:GO:0052689; C:GO:0005829	P:formaldehyde catabolic process; F:S-formylglutathione hydrolase activity; F:carboxylic ester hydrolase activity; C:cytosol	EC:3.1.2.12; EC:3.1.1.1	S-formylglutathione hydrolase; Carboxylesterase	IPR029058 (G3DSA:3.40.50.GENE3D); IPR000801 (PFAM); IPR014186 (PANTHER); PTHR10061:SF0 (PANTHER); IPR029058 (SUPERFAMILY)	P:GO:0046294; F:GO:0018738	P:formaldehyde catabolic process; F:S-formylglutathione hydrolase activity
EV depleted ESP		DN12373_c1_g1_i14_39625	524	26185	26	31	18	9	6	2.32		S-formylglutathione hydrolase	TRUE	[INTERPRO, BLASTED, MAPPED, ANNOTATED]	214	20	4.66423e-110	74.64	4	P:GO:0046294; F:GO:0018738; F:GO:0052689; C:GO:0005737	P:formaldehyde catabolic process; F:S-formylglutathione hydrolase activity; F:carboxylic ester hydrolase activity; C:cytoplasm	EC:3.1.2.12; EC:3.1.1.1	S-formylglutathione hydrolase; Carboxylesterase	IPR000801 (PFAM); IPR029058 (G3DSA:3.40.50.GENE3D); IPR014186 (PANTHER); IPR029058 (SUPERFAMILY)	P:GO:0046294; F:GO:0018738	P:formaldehyde catabolic process; F:S-formylglutathione hydrolase activity
EV depleted ESP		DN8972_c0_g1_i1_2323	637	47626	26	34	22	23	16	2.82		actin modulator protein	TRUE	[INTERPRO, BLASTED, MAPPED, ANNOTATED]	380	20	0	83.98	5	P:GO:0045010; P:GO:0051014; P:GO:0051016; F:GO:0005509; F:GO:0051015	P:actin nucleation; P:actin filament severing; P:barbed-end actin filament capping; F:calcium ion binding; F:actin filament binding			IPR007122 (PRINTS); IPR007123 (PFAM); IPR029006 (G3DSA:3.40.20.GENE3D); IPR029006 (G3DSA:3.40.20.GENE3D); IPR029006 (G3DSA:3.40.20.GENE3D); IPR007122 (PANTHER); PTHR11977:SF109 (PANTHER); cd11290 (CDD); SSF55753 (SUPERFAMILY); SSF55753 (SUPERFAMILY); SSF55753 (SUPERFAMILY)	F:GO:0051015	F:actin filament binding
EV depleted ESP		DN10123_c0_g1_i1_21779	357	88670	25.6667	31	19	25	16	0.99		procollagen lysine2 oxoglutarate 5 dioxygenase	TRUE	[INTERPRO, BLASTED, MAPPED, ANNOTATED]	724	20	0	80.17	5	P:GO:0055114; F:GO:0005506; F:GO:0016705; F:GO:0031418; F:GO:0051213	P:oxidation-reduction process; F:iron ion binding; F:oxidoreductase activity, acting on paired donors, with incorporation or reduction of molecular oxygen; F:L-ascorbic acid binding; F:dioxygenase activity			G3DSA:2.60.120.620 (GENE3D); PTHR10730 (PANTHER); PTHR10730:SF45 (PANTHER); IPR005123 (PROSITE_PROFILES); IPR029044 (SUPERFAMILY)	P:GO:0055114; F:GO:0016491	P:oxidation-reduction process; F:oxidoreductase activity
EV depleted ESP		DN11868_c0_g1_i1_44603	341	90018	25.6667	31	9	17	7	0.33		microsomal triglyceride transfer protein large	TRUE	[INTERPRO, BLASTED, MAPPED, ANNOTATED]	748	20	0	67.32	4	P:GO:0015914; P:GO:0016310; F:GO:0005548; F:GO:0016301	P:phospholipid transport; P:phosphorylation; F:phospholipid transporter activity; F:kinase activity			Coil (COILS); PTHR13024:SF0 (PANTHER); IPR039988 (PANTHER)	F:GO:0005548	F:phospholipid transporter activity
EV depleted ESP		DN6787_c0_g1_i1_11496	1027	39353	25.3333	34	27	21	17	4.89		sj ts4 protein	TRUE	[INTERPRO, BLASTED]	288	20	2.54706e-142	74.42						mobidb-lite (MOBIDB_LITE); PTHR14024 (PANTHER); PTHR14024 (PANTHER); PTHR14024:SF49 (PANTHER); PTHR14024:SF49 (PANTHER)	no GO terms	no GO terms
EV depleted ESP		DN7852_c0_g1_i1_1626	357	66578	25	27	12	19	11	0.78		lysyl oxidase	TRUE	[INTERPRO, BLASTED, MAPPED, ANNOTATED]	508	20	0	77.89	6	P:GO:0006897; P:GO:0055114; F:GO:0005044; F:GO:0005507; F:GO:0016641; C:GO:0016020	P:endocytosis; P:oxidation-reduction process; F:scavenger receptor activity; F:copper ion binding; F:oxidoreductase activity, acting on the CH-NH2 group of donors, oxygen as acceptor; C:membrane			IPR001190 (PRINTS); IPR001695 (PRINTS); IPR036772 (G3DSA:3.10.250.GENE3D); IPR001695 (PFAM); IPR036772 (G3DSA:3.10.250.GENE3D); IPR001190 (PFAM); PTHR45817:SF4 (PANTHER); PTHR45817 (PANTHER); PTHR45817:SF4 (PANTHER); IPR001190 (PROSITE_PROFILES); IPR001190 (PROSITE_PROFILES); IPR036772 (SUPERFAMILY); IPR036772 (SUPERFAMILY)	P:GO:0055114; F:GO:0005044; F:GO:0005507; F:GO:0016641; C:GO:0016020	P:oxidation-reduction process; F:scavenger receptor activity; F:copper ion binding; F:oxidoreductase activity, acting on the CH-NH2 group of donors, oxygen as acceptor; C:membrane
EV depleted ESP		DN10600_c0_g1_i1_33030	331	65372	24.6667	26	13	14	9	0.89		cysteine synthase, putative	TRUE	[INTERPRO, BLASTED, MAPPED, ANNOTATED]	418	20	0	68.25	2	P:GO:0006535; F:GO:0003824	P:cysteine biosynthetic process from serine; F:catalytic activity			IPR001926 (PFAM); IPR036052 (G3DSA:3.40.50.GENE3D); IPR036052 (G3DSA:3.40.50.GENE3D); G3DSA:3.10.580.10 (GENE3D); PTHR10314 (PANTHER); PTHR10314:SF177 (PANTHER); cd04608 (CDD); cd01561 (CDD); SSF54631 (SUPERFAMILY); IPR036052 (SUPERFAMILY)	no GO terms	no GO terms
EV depleted ESP		DN10436_c0_g1_i1_34321	481	29960	23.6667	29	20	13	9	4.99		Rho GDP-dissociation inhibitor	TRUE	[INTERPRO, BLASTED, MAPPED, ANNOTATED]	190	20	6.52866e-111	74.71	3	P:GO:0050790; F:GO:0005094; C:GO:0005737	P:regulation of catalytic activity; F:Rho GDP-dissociation inhibitor activity; C:cytoplasm			IPR000406 (PFAM); IPR024792 (G3DSA:2.70.50.GENE3D); IPR000406 (PANTHER); PTHR10980:SF3 (PANTHER); IPR014756 (SUPERFAMILY)	F:GO:0005094; C:GO:0005737	F:Rho GDP-dissociation inhibitor activity; C:cytoplasm
EV depleted ESP	Immunomodulators	DN12464_c0_g1_i3_71373	351	50095	23.6667	25	13	19	10	1.29		unnamed protein product	TRUE	[INTERPRO, BLASTED, MAPPED]	184	20	3.70329e-66	67.72	1	C:GO:0005615	C:extracellular space			IPR023796 (PFAM); IPR042178 (G3DSA:3.30.497.GENE3D); IPR042185 (G3DSA:2.30.39.GENE3D); IPR015557 (PTHR11461:PANTHER); IPR000215 (PANTHER); IPR023795 (PROSITE_PATTERNS); IPR036186 (SUPERFAMILY)	F:GO:0004867; C:GO:0005615	F:serine-type endopeptidase inhibitor activity; C:extracellular space
EV depleted ESP		DN1715_c0_g1_i1_4051	634	21983	23.3333	36	20	20	12	8.7		peptidylprolyl isomerase	TRUE	[INTERPRO, BLASTED, MAPPED, ANNOTATED]	166	20	6.53312e-94	85.47	5	P:GO:0000413; P:GO:0006457; F:GO:0003755; C:GO:0005737; C:GO:0016021	P:protein peptidyl-prolyl isomerization; P:protein folding; F:peptidyl-prolyl cis-trans isomerase activity; C:cytoplasm; C:integral component of membrane	EC:5.2.1.8	Peptidylprolyl isomerase	IPR002130 (PRINTS); IPR024936 (PIRSF); IPR029000 (G3DSA:2.40.100.GENE3D); IPR002130 (PFAM); PTHR11071 (PANTHER); PTHR11071:SF503 (PANTHER); IPR020892 (PROSITE_PATTERNS); IPR002130 (PROSITE_PROFILES); cd01926 (CDD); IPR029000 (SUPERFAMILY)	P:GO:0000413; P:GO:0006457; F:GO:0003755	P:protein peptidyl-prolyl isomerization; P:protein folding; F:peptidyl-prolyl cis-trans isomerase activity
EV depleted ESP		DN11378_c1_g1_i1_50069	324	115615	23	29	12	25	11	0.36		Bravo-like intracellular region	TRUE	[INTERPRO, BLASTED, MAPPED, ANNOTATED]	903	20	0	66.7	1	C:GO:0016021	C:integral component of membrane			IPR026966 (PFAM); mobidb-lite (MOBIDB_LITE); mobidb-lite (MOBIDB_LITE)	no GO terms	no GO terms
EV depleted ESP		DN12307_c2_g1_i3_39943	697	36260	23	39	20	16	10	3.42		aldo keto reductase family 1 member B4	TRUE	[INTERPRO, BLASTED, MAPPED, ANNOTATED]	278	20	9.58125e-146	79.54	2	P:GO:0055114; F:GO:0016491	P:oxidation-reduction process; F:oxidoreductase activity			IPR020471 (PRINTS); IPR023210 (PFAM); IPR036812 (G3DSA:3.20.20.GENE3D); IPR020471 (PIRSF); IPR020471 (PANTHER); PTHR11732:SF482 (PANTHER); IPR018170 (PROSITE_PATTERNS); IPR018170 (PROSITE_PATTERNS); IPR018170 (PROSITE_PATTERNS); IPR023210 (CDD); IPR036812 (SUPERFAMILY)	P:GO:0055114; F:GO:0016491	P:oxidation-reduction process; F:oxidoreductase activity
EV depleted ESP		DN11787_c4_g1_i1_48100	192	96656	22.6667	23	8	19	6	0.31		beta catenin protein 1	TRUE	[INTERPRO, BLASTED]	632	20	0	79.58						Coil (COILS); IPR013180 (PFAM); IPR011989 (G3DSA:1.25.10.GENE3D); mobidb-lite (MOBIDB_LITE); mobidb-lite (MOBIDB_LITE); IPR039678 (PANTHER); IPR016024 (SUPERFAMILY)	no GO terms	no GO terms
EV depleted ESP		DN8156_c0_g1_i2_52113	549	178345	22.6667	34	16	24	12	0.31		Serine/threonine kinase	TRUE	[INTERPRO, BLASTED, MAPPED, ANNOTATED]	1200	20	0	69.66	5	P:GO:0006468; P:GO:0035556; F:GO:0004674; F:GO:0005524; F:GO:0046872	P:protein phosphorylation; P:intracellular signal transduction; F:protein serine/threonine kinase activity; F:ATP binding; F:metal ion binding	EC:2.7.11	Transferring phosphorus-containing groups	Coil (COILS); Coil (COILS); Coil (COILS); Coil (COILS); Coil (COILS); G3DSA:3.30.60.20 (GENE3D); IPR000719 (PFAM); mobidb-lite (MOBIDB_LITE); mobidb-lite (MOBIDB_LITE); mobidb-lite (MOBIDB_LITE); mobidb-lite (MOBIDB_LITE); IPR029875 (PTHR22988:PANTHER); PTHR22988 (PANTHER); IPR029875 (PTHR22988:PANTHER); PTHR22988 (PANTHER); IPR017441 (PROSITE_PATTERNS); IPR008271 (PROSITE_PATTERNS); IPR000719 (P…	P:GO:0006468; P:GO:0035556; F:GO:0004672; F:GO:0004674; F:GO:0005524	P:protein phosphorylation; P:intracellular signal transduction; F:protein kinase activity; F:protein serine/threonine kinase activity; F:ATP binding
EV depleted ESP		DN10491_c0_g3_i2_21343	368	98415	22.3333	24	12	19	12	0.48		Programmed cell death 6-interacting protein	TRUE	[INTERPRO, BLASTED]	839	20	0	72.21						Coil (COILS); IPR025304 (PFAM); IPR004328 (PFAM); IPR038499 (G3DSA:1.25.40.GENE3D); G3DSA:1.20.140.50 (GENE3D); G3DSA:1.20.120.560 (GENE3D); mobidb-lite (MOBIDB_LITE); mobidb-lite (MOBIDB_LITE); mobidb-lite (MOBIDB_LITE); mobidb-lite (MOBIDB_LITE); mobidb-lite (MOBIDB_LITE); PTHR23030 (PANTHER); IPR004328 (PROSITE_PROFILES)	F:GO:0005515	F:protein binding
EV depleted ESP		DN8196_c0_g1_i1_27920	600	36154	22	28	19	11	7	1.86		hydroxyacylglutathione hydrolase	TRUE	[INTERPRO, BLASTED, MAPPED, ANNOTATED]	283	20	1.32376e-154	76.51	2	P:GO:0019243; F:GO:0004416	P:methylglyoxal catabolic process to D-lactate via S-lactoyl-glutathione; F:hydroxyacylglutathione hydrolase activity	EC:3.1.2.6	Hydroxyacylglutathione hydrolase	IPR001279 (PFAM); IPR017782 (PIRSF); IPR036866 (G3DSA:3.60.15.GENE3D); IPR032282 (PFAM); IPR017782 (TIGRFAM); PTHR11935 (PANTHER); IPR017782 (HAMAP); IPR035680 (CDD); IPR036866 (SUPERFAMILY)	P:GO:0019243; F:GO:0004416	P:methylglyoxal catabolic process to D-lactate via S-lactoyl-glutathione; F:hydroxyacylglutathione hydrolase activity
EV depleted ESP		DN9849_c0_g1_i1_49161	140	252924	22	25	7	23	6	0.08		putative myosin-10 (Myosin heavy chain, nonmuscle IIb) (Nonmuscle myosin heavy chain IIb) (NMMHC II-b) (NMMHC-IIB) (Cellular myosin heavy chain, type B) (Nonmuscle myosin heavy chain-B) (NMMHC-B)	TRUE	[INTERPRO, BLASTED, MAPPED, ANNOTATED]	1991	20	0	83.19	5	F:GO:0003774; F:GO:0005524; F:GO:0051015; C:GO:0016021; C:GO:0016459	F:motor activity; F:ATP binding; F:actin filament binding; C:integral component of membrane; C:myosin complex	EC:3.6.1.15	Nucleoside-triphosphate phosphatase	Coil (COILS); Coil (COILS); Coil (COILS); Coil (COILS); Coil (COILS); Coil (COILS); Coil (COILS); Coil (COILS); Coil (COILS); Coil (COILS); Coil (COILS); IPR001609 (PRINTS); IPR027401 (G3DSA:4.10.270.GENE3D); IPR036961 (G3DSA:3.40.850.GENE3D); IPR002928 (PFAM); G3DSA:1.20.120.720 (GENE3D); G3DSA:1.20.58.530 (GENE3D); G3DSA:1.20.5.1050 (GENE3D); IPR004009 (PFAM); IPR001609 (PFAM); G3DSA:3.30.70.32…	F:GO:0003774; F:GO:0005515; F:GO:0005524; F:GO:0051015; C:GO:0016459	F:motor activity; F:protein binding; F:ATP binding; F:actin filament binding; C:myosin complex
EV depleted ESP		DN11126_c0_g1_i1_62265	409	49607	21.6667	28	12	17	9	0.9		retinaldehyde binding protein	TRUE	[INTERPRO, BLASTED]	376	20	5.78968e-160	67.7						IPR001251 (PFAM); IPR036865 (G3DSA:3.40.525.GENE3D); mobidb-lite (MOBIDB_LITE); PTHR45824 (PANTHER); PTHR45824:SF6 (PANTHER); IPR001251 (PROSITE_PROFILES); IPR001251 (CDD); IPR036273 (SUPERFAMILY); IPR036865 (SUPERFAMILY)	no GO terms	no GO terms
EV depleted ESP		DN9145_c0_g1_i1_32319	371	84107	21.6667	25	14	18	10	0.64		leukotriene a4 hydrolase	TRUE	[INTERPRO, BLASTED, MAPPED, ANNOTATED]	624	20	0	81.82	3	P:GO:0006508; F:GO:0008237; F:GO:0008270	P:proteolysis; F:metallopeptidase activity; F:zinc ion binding			IPR001930 (PRINTS); IPR038502 (G3DSA:1.25.40.GENE3D); IPR042097 (G3DSA:2.60.40.GENE3D); IPR014782 (PFAM); G3DSA:1.10.1740.60 (GENE3D); IPR027268 (G3DSA:1.10.390.GENE3D); PF17900 (PFAM); IPR015211 (PFAM); PTHR45726:SF3 (PANTHER); IPR034015 (PANTHER); IPR034015 (CDD); SSF55486 (SUPERFAMILY); IPR042097 (SUPERFAMILY); IPR016024 (SUPERFAMILY)	P:GO:0006508; F:GO:0008237; F:GO:0008270	P:proteolysis; F:metallopeptidase activity; F:zinc ion binding
EV depleted ESP		DN10527_c0_g1_i1_53269	136	152118	21.3333	27	3	16	3	0.07		Heat shock 70 kDa protein 4	TRUE	[INTERPRO, BLASTED]	722	20	0	67.82						PR00301 (PRINTS); G3DSA:3.30.420.40 (GENE3D); IPR029048 (G3DSA:1.20.1270.GENE3D); IPR029047 (G3DSA:2.60.34.GENE3D); G3DSA:3.30.420.40 (GENE3D); IPR013126 (PFAM); G3DSA:3.90.640.10 (GENE3D); mobidb-lite (MOBIDB_LITE); mobidb-lite (MOBIDB_LITE); mobidb-lite (MOBIDB_LITE); mobidb-lite (MOBIDB_LITE); mobidb-lite (MOBIDB_LITE); PTHR45639 (PANTHER); IPR043129 (SUPERFAMILY); IPR029048 (SUPERFAMILY); IPR…	no GO terms	no GO terms
EV depleted ESP		DN12676_c0_g1_i5_72043	513	49478	21.3333	23	18	14	11	1.99		Annexin A13 (Annexin XIII)	TRUE	[INTERPRO, BLASTED, MAPPED, ANNOTATED]	349	20	0	75	2	F:GO:0005509; F:GO:0005544	F:calcium ion binding; F:calcium-dependent phospholipid binding			IPR001464 (PRINTS); IPR018502 (PFAM); IPR037104 (G3DSA:1.10.220.GENE3D); IPR037104 (G3DSA:1.10.220.GENE3D); IPR037104 (G3DSA:1.10.220.GENE3D); IPR037104 (G3DSA:1.10.220.GENE3D); PTHR10502 (PANTHER); IPR018502 (PROSITE_PROFILES); IPR018502 (PROSITE_PROFILES); IPR018502 (PROSITE_PROFILES); IPR037104 (SUPERFAMILY)	F:GO:0005509; F:GO:0005544	F:calcium ion binding; F:calcium-dependent phospholipid binding
EV depleted ESP	Immunomodulators	DN9013_c0_g1_i2_47406	363	61092	21.3333	18	10	14	8	0.69		glycoprotein Antigen 5	TRUE	[INTERPRO, BLASTED, MAPPED, ANNOTATED]	483	20	0	68.67	2	P:GO:0006508; F:GO:0004252	P:proteolysis; F:serine-type endopeptidase activity	EC:3.4.21.73; EC:3.4.24.7; EC:3.4.21.71; EC:3.4.24.3; EC:3.4.21.34; EC:3.4.21.78; EC:3.4.21.75; EC:3.4.21.26; EC:3.4.21.27; EC:3.4.21.68; EC:3.4.21.69; EC:3.4.24.34; EC:3.4.21.41; EC:3.4.21.83; EC:3.4.21.88; EC:3.4.21.45; EC:3.4.21.89; EC:3.4.21.42; EC:3.4.19.1; EC:3.4.21.43; EC:3.4.21.87; EC:3.4.21.38; EC:3.4.21.35; EC:3.4.21.79; EC:3.4.21.36; EC:3.4.21.102; EC:3.4.21.39; EC:3.4.21; EC:3.4.21.4;…	U-plasminogen activator; Interstitial collagenase; Pancreatic elastase II; Microbial collagenase; Plasma kallikrein; Granzyme A; Furin; Prolyl oligopeptidase; Coagulation factor XIa; T-plasminogen activator; Protein C (activated); Neutrophil collagenase; Complement subcomponent C1r; Oligopeptidase B; Repressor LexA; Complement factor I; Signal peptidase I; Complement subcomponent C1s; Acylaminoac…	Coil (COILS); IPR001314 (PRINTS); IPR043504 (G3DSA:2.40.10.GENE3D); IPR001254 (PFAM); IPR043504 (G3DSA:2.40.10.GENE3D); IPR043504 (G3DSA:2.40.10.GENE3D); mobidb-lite (MOBIDB_LITE); PTHR24260 (PANTHER); IPR018114 (PROSITE_PATTERNS); IPR001254 (PROSITE_PROFILES); IPR001254 (CDD); IPR009003 (SUPERFAMILY)	P:GO:0006508; F:GO:0004252	P:proteolysis; F:serine-type endopeptidase activity
EV depleted ESP		DN10361_c0_g1_i1_17166	365	95656	21	29	12	26	11	0.5		transitional endoplasmic reticulum atpase	TRUE	[INTERPRO, BLASTED, MAPPED, ANNOTATED]	800	20	0	94.32	3	P:GO:0051301; F:GO:0005524; F:GO:0016787	P:cell division; F:ATP binding; F:hydrolase activity			Coil (COILS); G3DSA:2.40.40.20 (GENE3D); IPR005938 (TIGRFAM); G3DSA:1.10.8.60 (GENE3D); IPR004201 (PFAM); IPR015415 (PFAM); G3DSA:3.10.330.10 (GENE3D); G3DSA:3.40.50.300 (GENE3D); G3DSA:1.10.8.60 (GENE3D); IPR041569 (PFAM); IPR003338 (PFAM); IPR003959 (PFAM); G3DSA:3.40.50.300 (GENE3D); mobidb-lite (MOBIDB_LITE); mobidb-lite (MOBIDB_LITE); PTHR23077:SF69 (PANTHER); PTHR23077 (PANTHER); IPR003960 …	F:GO:0005524; F:GO:0016787; F:GO:0016887	F:ATP binding; F:hydrolase activity; F:ATPase activity
EV depleted ESP		DN11172_c1_g1_i2_62297	568	87144	21	25	17	20	13	0.81		prolyl endopeptidase	TRUE	[INTERPRO, BLASTED, MAPPED, ANNOTATED]	725	20	0	79.85	2	P:GO:0006508; F:GO:0004252	P:proteolysis; F:serine-type endopeptidase activity	EC:3.4.21.73; EC:3.4.24.7; EC:3.4.21.71; EC:3.4.24.3; EC:3.4.21.34; EC:3.4.21.78; EC:3.4.21.75; EC:3.4.21.26; EC:3.4.21.27; EC:3.4.21.68; EC:3.4.21.69; EC:3.4.24.34; EC:3.4.21.41; EC:3.4.21.83; EC:3.4.21.88; EC:3.4.21.45; EC:3.4.21.89; EC:3.4.21.42; EC:3.4.19.1; EC:3.4.21.43; EC:3.4.21.87; EC:3.4.21.38; EC:3.4.21.35; EC:3.4.21.79; EC:3.4.21.36; EC:3.4.21.102; EC:3.4.21.39; EC:3.4.21; EC:3.4.21.4;…	U-plasminogen activator; Interstitial collagenase; Pancreatic elastase II; Microbial collagenase; Plasma kallikrein; Granzyme A; Furin; Prolyl oligopeptidase; Coagulation factor XIa; T-plasminogen activator; Protein C (activated); Neutrophil collagenase; Complement subcomponent C1r; Oligopeptidase B; Repressor LexA; Complement factor I; Signal peptidase I; Complement subcomponent C1s; Acylaminoac…	IPR002470 (PRINTS); IPR029058 (G3DSA:3.40.50.GENE3D); IPR001375 (PFAM); G3DSA:2.130.10.120 (GENE3D); IPR023302 (PFAM); PTHR42881:SF2 (PANTHER); PTHR42881 (PANTHER); IPR002471 (PROSITE_PATTERNS); SSF50993 (SUPERFAMILY); IPR029058 (SUPERFAMILY)	P:GO:0006508; F:GO:0004252; F:GO:0008236	P:proteolysis; F:serine-type endopeptidase activity; F:serine-type peptidase activity
EV depleted ESP		DN10117_c0_g2_i1_74391	463	61372	20.6667	33	17	22	12	1.19		Cystathionine gamma-lyase	TRUE	[INTERPRO, BLASTED, MAPPED, ANNOTATED]	412	20	0	77.1	3	P:GO:0019346; F:GO:0016829; F:GO:0030170	P:transsulfuration; F:lyase activity; F:pyridoxal phosphate binding			IPR015422 (G3DSA:3.90.1150.GENE3D); IPR000277 (PIRSF); IPR000277 (PFAM); IPR015421 (G3DSA:3.40.640.GENE3D); PTHR11808:SF15 (PANTHER); IPR000277 (PANTHER); IPR000277 (PROSITE_PATTERNS); IPR000277 (CDD); IPR015424 (SUPERFAMILY)	P:GO:0019346; F:GO:0003824; F:GO:0030170	P:transsulfuration; F:catalytic activity; F:pyridoxal phosphate binding
EV depleted ESP		DN10565_c0_g1_i2_3141	406	60227	20.6667	31	15	18	10	0.89		Alpha N acetylgalactosaminidase	TRUE	[INTERPRO, BLASTED, MAPPED, ANNOTATED]	421	20	0	74.22	3	P:GO:0005975; F:GO:0004553; C:GO:0016020	P:carbohydrate metabolic process; F:hydrolase activity, hydrolyzing O-glycosyl compounds; C:membrane			IPR002241 (PRINTS); IPR013780 (G3DSA:2.60.40.GENE3D); IPR013785 (G3DSA:3.20.20.GENE3D); IPR035373 (PFAM); IPR002241 (PFAM); PTHR11452:SF58 (PANTHER); IPR002241 (PANTHER); IPR000111 (PROSITE_PATTERNS); IPR002241 (CDD); SSF51011 (SUPERFAMILY); IPR017853 (SUPERFAMILY)	P:GO:0005975; F:GO:0003824; F:GO:0004553	P:carbohydrate metabolic process; F:catalytic activity; F:hydrolase activity, hydrolyzing O-glycosyl compounds
EV depleted ESP		DN12817_c5_g2_i1_68882	836	49970	20.6667	39	24	15	12	2.59		Non-lysosomal glucosylceramidase	TRUE	[INTERPRO, BLASTED, MAPPED, ANNOTATED]	435	20	0	69.01	1	F:GO:0003824	F:catalytic activity			IPR024462 (PFAM); IPR012341 (G3DSA:1.50.10.GENE3D); IPR006775 (PFAM); PTHR12654:SF0 (PANTHER); PTHR12654 (PANTHER); IPR008928 (SUPERFAMILY)	P:GO:0005975; F:GO:0004553	P:carbohydrate metabolic process; F:hydrolase activity, hydrolyzing O-glycosyl compounds
EV depleted ESP		DN7315_c0_g1_i6_5749	494	56805	20.6667	20	13	17	11	0.97		Thioredoxin fold	TRUE	[INTERPRO, BLASTED, MAPPED]	414	20	0	66.31	1	F:GO:0016853	F:isomerase activity			IPR036249 (G3DSA:3.40.30.GENE3D); IPR013766 (PFAM); IPR036249 (G3DSA:3.40.30.GENE3D); PF13848 (PFAM); mobidb-lite (MOBIDB_LITE); PTHR46295 (PANTHER); IPR013766 (PROSITE_PROFILES); IPR036249 (SUPERFAMILY); IPR036249 (SUPERFAMILY)	no GO terms	no GO terms
[truncated: 501 more rows]
