# Supplementary material for: Evidence of Immune Modulators in the Secretome of the Equine Tapeworm Anoplocephala perfoliata
Source: Pathogens. 2021 Jul 20;10(7):912. doi: 10.3390/pathogens10070912 (PMC8308605; doi:10.3390/pathogens10070912)
Supplement: Supplementary file 1 [file pathogens-10-00912-s001.zip › Supplementary Table S5. Protein sequences of recognised Sigma class GST, HSP90 family and alpha-Enolases.xlsx]

## Sheet: Table S5. Recognised sequences
Supplementary Table S5. Protein sequences of recognised Sigma class GST, HSP90 family (alpha and beta isoforms) and alpha-Enolases.
No.	Species	Phylum/ Class	Short name	Accession Number	Citation
1	Echinococcus granulosus	Cestoda	Egra Mu isozyme/ Egra GSTS2	XP_024351601	Zheng et al., 2013 [136]
2	Echinococcus granulosus	Cestoda	Egra Mu isozyme/ Egra GSTS3	EUB60467	Zheng et al., 2013 [136]
3	Echinococcus granulosus	Cestoda	Egra Sigma_like/ Egra GSTS1	ADQ89757	Iriarte et al., 2012 [137]
4	Echinococcus multicularis	Cestoda	Emul Sigma_like/ Emul GSTS	CDS39356	Tsai et al., 2013 [64]
5	Hymenolepis microstoma	Cestoda	Hmic Sigma_like/ Hmic GSTS1	CDS28394	Tsai et al., 2013 [64]
6	Hymenolepis microstoma	Cestoda	Hmic Sigma_like/ Hmic GSTS2	CDS25704	Tsai et al., 2013 [64]
7	Taenia solium	Cestoda	Tsol Sigma/ TsolGSTS	ACN88552	Nguyen et al., 2010 [52]
8	Homo sapiens	Mammalia	Hsap Sigma_like/ HsapGSTS	O60760	Kanaoka et al., 2000 [138]
9	Mus musculus	Mammalia	Mmus Sigma_like / MmusGSTS	Q9JHF7	Kanaoka et al., 2000 [138]
10	Ascaris suum	Nematoda	Asum Sigma_like/ AsumGSTS	P46436	Liebau et al., 1994 [139] &1997 [140]
11	Haemonchus contortus	Nematoda	Hcon Nu/ HconGSTNu	Q9NAW7	Sharp et al., 1991 [141]
12	Clonorchis sinensis	Trematoda	Csin Sigma / CsinGSTS	O97096	Kang et al., 2001 [142]
13	Fasciola gigantica	Trematoda	Fgig Sigma/ FgigGSTS	AFX98103	Morphew et al., 2012 [127]
14	Fasciola hepatica	Trematoda	Fhep Sigma_like/ FhepGSTS	ABI79450	Morphew et al., 2012 [127]
15	Schistosoma haematobium	Trematoda	Shae Sigma like/ ShaeGSTS	P30114	Trottein et al., 1992 [128]
16	Schistosoma mansoni	Trematoda	Sman Sigma like/ SmanGSTS	P09792	Balloul et al., 1987 [129]
17	Ascaris suum	Nematoda	Asuu HSP90	ACO55134.1	NCBI
18	Brugia malayi	Nematoda	Bmal HSP90	XP_001901767.1	Faya et al., 2015 [130]
19	Brugia pahangi	Nematoda	Bpah HSP90	CAA06694.1	Wang et al., 2012 [131]
20	Caenorhabditis elegans	Nematoda	Cele HSP90	NP_506626.1	Wang et al., 2012 [131]
21	Clonorchis sinensis	Nematoda	Csin HSP90 HtpG	GAA47176.1	Faya et al., 2015 [130]
22	Cricetulus griseus	Mammalia	Cgri HSP90 alpha/Cgri HSP90α	AAA36992.1	Skantar & Carta, 2004 [56]
23	Echinococcus granulosus	Cestoda	Egra HSP90 alpha/Egra HSP90α	CDI70178.1	NCBI
24	Echinococcus granulosus	Cestoda	Egra HSP90 alpha/Egra HSP90α	XP_024345770.1	NCBI
25	Echinococcus granulosus	Cestoda	Egra HSP90	CDS25067.1	NCBI
26	Echinococcus multicularis	Cestoda	Emul HSP90	CDS39694.1	NCBI
27	Equus caballus	Mammalia	Ecab HSP90 alpha/Ecab HSP90α	Q9GKX7.2	Pantzartzi et al., 2013 [132]
28	Equus caballus	Mammalia	Ecab HSP90 beta/Ecab HSP90β	Q9GKX8.3	Pantzartzi et al., 2013 [132]
29	Fasciola gigantica	Trematoda	Fgig HSP90 alpha/Fgig HSP9α	TPP59511.1	NCBI
30	Fasciola hepatica	Trematoda	Fhep HSP90 alpha/Fhep HSP90α	THD20903.1	NCBI
31	Haemonchus contortus	Nematoda	Hcon HSP90	ACU00668.1	Chen & Shih, 2015 [133]
32	Homo sapiens	Mammalia	Hsap HSP90 alpha/Hsap HSP90α	NP_005339.3	Faya et al., 2015 [130]
33	Homo sapiens	Mammalia	Hsap HSP90 beta/Hsap HSP90β	NP_031381.2	Faya et al., 2015 [130]
34	Hymenolepis microstoma	Cestoda	Hmic HSP90	CDS28179.1	NCBI
35	Macaca mulatta	Mammalia	Mmul HSP90 alpha/Mmul HSP90α	NP_001182596.1	NCBI
36	Mus musculus	Mammalia	Mmus HSP90 alpha/Mmus HSP90α	NP_034610.1	PEPIN et al., 2001 [134]; Pantzartzi et al., 2013 [132]; NCBI
37	Mus musculus	Mammalia	Mmus HSP90 beta/Mmus HSP90β	NP_032328.2	PEPIN et al., 2001 [134]; Pantzartzi et al., 2013 [132]; NCBI
38	Rattus sp.	Mammalia	Rattus HSP90	AAB23369.1	Feng et al., 2010 [135]
39	Strongyloides ratti	Nematoda	Srat HSP90 alpha/Srat HSP90α	XP_024500409.1	NCBI
40	Sus scrofa, mammals, pig	Mammalia	Sscr HSP90 alpha/Sscr HSP90α	AAC48718.1	Skantar & Carta, 2004 [56]
41	Toxocara cati	Nematoda	Tcat HSP90	ACO55135.1	Faya et al., 2015 [130]
42	Trichinella spiralis	Nematoda	Tspi HSP90	XP_003374556.1	Faya et al., 2015 [130]
43	Wuchereria bancrofti	Nematoda	Wban HSP90	EJW88125.1	Faya et al., 2015 [130]
44	Onchocerca volvulus	Nematoda	Ovol Enolase	AAP81756	NCBI
45	Fasciola hepatica	Trematoda	Fhep Enolase	THD20548	NCBI
46	Fasciola gigantica	Trematoda	Fgig Enolase	TPP57273	NCBI
47	Clonorchis sinensis	Trematoda	Csin Enolase	KAG5442501	NCBI
48	Schistosoma mansoni	Trematoda	Sman Enolase	Q27877	NCBI
49	Schistosoma haematobium	Trematoda	Shae Enolase	XP_012793992	NCBI
50	Echinococcus multicularis	Cestoda	Emul Enolase	CDS37852	NCBI
51	Echinococcus granulosus	Cestoda	Egran Enolase	ACY30465	NCBI
52	Hymenolepis microstoma	Cestoda	Hmic Enolase	CDS30005	NCBI
53	Hymenolepis microstoma	Cestoda	Hmic Enolase	CDS26422	NCBI
54	Homo sapiens	Mammalia	Hsap Enolase	CAA59331	NCBI
55	Mus musculus	Mammalia	Mmus Enolase	NP_001020559	NCBI
56	Ascaris suum	Nematoda	Asum Enolase	ADQ00605	NCBI
57	Haemonchus contortus	Nematoda	Hcon Enolase	AIZ75644	NCBI
58	Taenia solium	Cestoda	Tsol Enolase	AHB59732	NCBI
